# Supplementary material for: A paracrine-to-autocrine shunt of GREM1 fuels colorectal cancer metastasis via ACVR1C
Source: Mol Cancer. 2026 Jan 24;25:174. doi: 10.1186/s12943-025-02554-w (PMC13371181; doi:10.1186/s12943-025-02554-w)
Supplement: Supplementary file 1 — Supplementary Material 1. [file 12943_2025_2554_MOESM1_ESM.xlsx]

## Sheet: Proteins
Accession	Description	Coverage [%]	MW [kDa]	calc. pI
Q15149	Plectin OS=Homo sapiens OX=9606 GN=PLEC PE=1 SV=3	52	531.5	5.96
P49327	Fatty acid synthase OS=Homo sapiens OX=9606 GN=FASN PE=1 SV=3	67	273.3	6.44
P21333	Filamin-A OS=Homo sapiens OX=9606 GN=FLNA PE=1 SV=4	62	280.6	6.06
P78527	DNA-dependent protein kinase catalytic subunit OS=Homo sapiens OX=9606 GN=PRKDC PE=1 SV=3	45	468.8	7.12
A0A0S2Z3G9	Actinin alpha 4 isoform 1 OS=Homo sapiens OX=9606 GN=ACTN4 PE=2 SV=1	79	104.8	5.44
H7C144	Alpha-actinin-4 OS=Homo sapiens OX=9606 GN=ACTN4 PE=1 SV=2	74	104.3	5.5
A0A024R694	Actinin, alpha 1, isoform CRA_a OS=Homo sapiens OX=9606 GN=ACTN1 PE=2 SV=1	80	103	5.41
E1NZA1	Peroxisome proliferator activated receptor interacting complex protein OS=Homo sapiens OX=9606 GN=PRIC295 PE=2 SV=1	52	292.6	7.43
P13639	Elongation factor 2 OS=Homo sapiens OX=9606 GN=EEF2 PE=1 SV=4	74	95.3	6.83
Q93009	Ubiquitin carboxyl-terminal hydrolase 7 OS=Homo sapiens OX=9606 GN=USP7 PE=1 SV=2	73	128.2	5.55
A0A024R7U6	DNA helicase OS=Homo sapiens OX=9606 GN=MCM4 PE=3 SV=1	69	96.5	6.74
Q6P2Q9	Pre-mRNA-processing-splicing factor 8 OS=Homo sapiens OX=9606 GN=PRPF8 PE=1 SV=2	50	273.4	8.84
A0A087WVQ6	Clathrin heavy chain OS=Homo sapiens OX=9606 GN=CLTC PE=1 SV=1	60	191.9	5.69
F5H2F4	C-1-tetrahydrofolate synthase, cytoplasmic OS=Homo sapiens OX=9606 GN=MTHFD1 PE=1 SV=2	68	104.6	7.59
O14980	Exportin-1 OS=Homo sapiens OX=9606 GN=XPO1 PE=1 SV=1	67	123.3	6.06
O75533	Splicing factor 3B subunit 1 OS=Homo sapiens OX=9606 GN=SF3B1 PE=1 SV=3	58	145.7	7.09
A0A3B3IT92	DNA helicase OS=Homo sapiens OX=9606 GN=MCM4 PE=1 SV=1	64	100.7	6.95
Q86VP6	Cullin-associated NEDD8-dissociated protein 1 OS=Homo sapiens OX=9606 GN=CAND1 PE=1 SV=2	67	136.3	5.78
P11216	Glycogen phosphorylase, brain form OS=Homo sapiens OX=9606 GN=PYGB PE=1 SV=5	68	96.6	6.86
Q01813	ATP-dependent 6-phosphofructokinase, platelet type OS=Homo sapiens OX=9606 GN=PFKP PE=1 SV=2	61	85.5	7.55
A0A024RD80	Heat shock protein 90kDa alpha (Cytosolic), class B member 1, isoform CRA_a OS=Homo sapiens OX=9606 GN=HSP90AB1 PE=3 SV=1	69	83.2	5.03
Q6IBM8	116 kDa U5 small nuclear ribonucleoprotein component OS=Homo sapiens OX=9606 GN=U5-116KD PE=2 SV=1	73	109.4	5
P33993	DNA replication licensing factor MCM7 OS=Homo sapiens OX=9606 GN=MCM7 PE=1 SV=4	70	81.3	6.46
P55060	Exportin-2 OS=Homo sapiens OX=9606 GN=CSE1L PE=1 SV=3	76	110.3	5.77
Q14974	Importin subunit beta-1 OS=Homo sapiens OX=9606 GN=KPNB1 PE=1 SV=2	67	97.1	4.78
A0A7I2V4F0	ATP-dependent RNA helicase DDX1 OS=Homo sapiens OX=9606 GN=DDX1 PE=1 SV=1	75	81.7	7.33
A0A0S2A4E4	4-alpha-glucanotransferase OS=Homo sapiens OX=9606 GN=AGL PE=4 SV=1	67	174.7	6.76
A0A7I2V6B9	Exportin-1 OS=Homo sapiens OX=9606 GN=XPO1 PE=1 SV=1	66	108.2	5.83
P23921	Ribonucleoside-diphosphate reductase large subunit OS=Homo sapiens OX=9606 GN=RRM1 PE=1 SV=1	72	90	7.15
P15924	Desmoplakin OS=Homo sapiens OX=9606 GN=DSP PE=1 SV=3	39	331.6	6.81
Q08211	ATP-dependent RNA helicase A OS=Homo sapiens OX=9606 GN=DHX9 PE=1 SV=4	53	140.9	6.84
A0A024R3T8	Poly [ADP-ribose] polymerase OS=Homo sapiens OX=9606 GN=PARP1 PE=4 SV=1	57	113	8.88
K9JA46	Epididymis luminal secretory protein 52 OS=Homo sapiens OX=9606 GN=EL52 PE=2 SV=1	62	84.6	5.02
Q9Y2A7	Nck-associated protein 1 OS=Homo sapiens OX=9606 GN=NCKAP1 PE=1 SV=1	54	128.7	6.62
C9JZR2	Catenin delta-1 OS=Homo sapiens OX=9606 GN=CTNND1 PE=1 SV=2	56	104.8	6.87
P33176	Kinesin-1 heavy chain OS=Homo sapiens OX=9606 GN=KIF5B PE=1 SV=1	64	109.6	6.51
P58107	Epiplakin OS=Homo sapiens OX=9606 GN=EPPK1 PE=1 SV=3	54	555.3	5.62
P08237	ATP-dependent 6-phosphofructokinase, muscle type OS=Homo sapiens OX=9606 GN=PFKM PE=1 SV=2	64	85.1	7.99
Q13200	26S proteasome non-ATPase regulatory subunit 2 OS=Homo sapiens OX=9606 GN=PSMD2 PE=1 SV=3	70	100.1	5.2
P13010	X-ray repair cross-complementing protein 5 OS=Homo sapiens OX=9606 GN=XRCC5 PE=1 SV=3	70	82.7	5.81
P78344	Eukaryotic translation initiation factor 4 gamma 2 OS=Homo sapiens OX=9606 GN=EIF4G2 PE=1 SV=1	69	102.3	7.14
P27708	CAD protein OS=Homo sapiens OX=9606 GN=CAD PE=1 SV=3	45	242.8	6.46
Q9NYU2	UDP-glucose:glycoprotein glucosyltransferase 1 OS=Homo sapiens OX=9606 GN=UGGT1 PE=1 SV=3	58	177.1	5.63
Q7KZF4	Staphylococcal nuclease domain-containing protein 1 OS=Homo sapiens OX=9606 GN=SND1 PE=1 SV=1	70	101.9	7.17
A0A024RC65	HCG1991735, isoform CRA_a OS=Homo sapiens OX=9606 GN=hCG_1991735 PE=4 SV=1	54	189.1	6.48
P54886	Delta-1-pyrroline-5-carboxylate synthase OS=Homo sapiens OX=9606 GN=ALDH18A1 PE=1 SV=2	66	87.2	7.12
A1LT96	Ubiquitin-activating enzyme E1-like 2, isoform CRA_a OS=Homo sapiens OX=9606 GN=UBE1L2 PE=3 SV=1	69	117.9	6.14
A8K916	AP complex subunit beta OS=Homo sapiens OX=9606 PE=2 SV=1	64	105.6	5.31
Q96T76	MMS19 nucleotide excision repair protein homolog OS=Homo sapiens OX=9606 GN=MMS19 PE=1 SV=2	63	113.2	6.35
Q14204	Cytoplasmic dynein 1 heavy chain 1 OS=Homo sapiens OX=9606 GN=DYNC1H1 PE=1 SV=5	28	532.1	6.4
A0A384MDY0	Catenin (Cadherin-associated protein), alpha 1, 102kDa, isoform CRA_b OS=Homo sapiens OX=9606 GN=CTNNA1 PE=2 SV=1	70	100	6.29
A0A0S2Z4T1	DNA helicase (Fragment) OS=Homo sapiens OX=9606 GN=MCM3 PE=2 SV=1	70	90.9	5.77
B7ZM99	Formyltetrahydrofolate synthetase OS=Homo sapiens OX=9606 GN=MTHFD1L PE=1 SV=1	69	105.8	8.06
Q16531	DNA damage-binding protein 1 OS=Homo sapiens OX=9606 GN=DDB1 PE=1 SV=1	56	126.9	5.26
Q7L576	Cytoplasmic FMR1-interacting protein 1 OS=Homo sapiens OX=9606 GN=CYFIP1 PE=1 SV=1	53	145.1	6.9
B1AHB0	DNA helicase OS=Homo sapiens OX=9606 GN=MCM5 PE=2 SV=1	69	82.2	8.37
O75643	U5 small nuclear ribonucleoprotein 200 kDa helicase OS=Homo sapiens OX=9606 GN=SNRNP200 PE=1 SV=2	44	244.4	6.06
E5KNY5	Leucine-rich PPR-motif containing OS=Homo sapiens OX=9606 GN=LRPPRC PE=4 SV=1	62	157.8	6.13
P42224	Signal transducer and activator of transcription 1-alpha/beta OS=Homo sapiens OX=9606 GN=STAT1 PE=1 SV=2	70	87.3	6.05
Q15393	Splicing factor 3B subunit 3 OS=Homo sapiens OX=9606 GN=SF3B3 PE=1 SV=4	46	135.5	5.26
H6VRF8	Cytokeratin-1 OS=Homo sapiens OX=9606 GN=KRT1 PE=3 SV=1	66	66	8.12
H0Y3P2	Eukaryotic translation initiation factor 4 gamma 2 OS=Homo sapiens OX=9606 GN=EIF4G2 PE=1 SV=1	67	98.1	6.99
A0A024QZM6	SEC24 related gene family, member C (S. cerevisiae), isoform CRA_a OS=Homo sapiens OX=9606 GN=SEC24C PE=3 SV=1	53	118.2	7.06
P42166	Lamina-associated polypeptide 2, isoform alpha OS=Homo sapiens OX=9606 GN=TMPO PE=1 SV=2	76	75.4	7.66
Q15437	Protein transport protein Sec23B OS=Homo sapiens OX=9606 GN=SEC23B PE=1 SV=2	74	86.4	6.89
A0A1S5UZ07	Talin-1 OS=Homo sapiens OX=9606 GN=TLN1 PE=2 SV=1	45	271.3	6.11
J3KN16	Proteasome adapter and scaffold protein ECM29 OS=Homo sapiens OX=9606 GN=ECPAS PE=1 SV=1	42	223.6	8.75
B3KWD0	cDNA FLJ42779 fis, clone BRAWH3005300, highly similar to Exportin-1 OS=Homo sapiens OX=9606 PE=2 SV=1	64	82.4	5.71
O75694	Nuclear pore complex protein Nup155 OS=Homo sapiens OX=9606 GN=NUP155 PE=1 SV=1	51	155.1	6.16
P53618	Coatomer subunit beta OS=Homo sapiens OX=9606 GN=COPB1 PE=1 SV=3	64	107.1	6.05
Q06210	Glutamine--fructose-6-phosphate aminotransferase [isomerizing] 1 OS=Homo sapiens OX=9606 GN=GFPT1 PE=1 SV=3	68	78.8	7.11
A0A024R7L8	UPF1 regulator of nonsense transcripts homolog (Yeast), isoform CRA_a OS=Homo sapiens OX=9606 GN=UPF1 PE=3 SV=1	63	124.3	6.61
A0A494C1L5	Lipopolysaccharide-responsive and beige-like anchor protein OS=Homo sapiens OX=9606 GN=LRBA PE=1 SV=1	31	317.6	5.57
E5KLM1	Dynamin-like 120 kDa protein, form S1 OS=Homo sapiens OX=9606 PE=4 SV=1	58	115.8	7.87
A0A090N7U0	Cullin 1 OS=Homo sapiens OX=9606 GN=CUL1 PE=3 SV=1	63	89.6	8
P17858	ATP-dependent 6-phosphofructokinase, liver type OS=Homo sapiens OX=9606 GN=PFKL PE=1 SV=6	57	85	7.5
Q15436	Protein transport protein Sec23A OS=Homo sapiens OX=9606 GN=SEC23A PE=1 SV=2	73	86.1	7.08
O00571	ATP-dependent RNA helicase DDX3X OS=Homo sapiens OX=9606 GN=DDX3X PE=1 SV=3	75	73.2	7.18
A0A024RB16	Family with sequence similarity 62 (C2 domain containing), member A, isoform CRA_a OS=Homo sapiens OX=9606 GN=FAM62A PE=3 SV=1	61	123.9	5.78
A0A024RDY0	RAN binding protein 5, isoform CRA_d OS=Homo sapiens OX=9606 GN=RANBP5 PE=4 SV=1	63	123.6	4.94
A0A0G2JPQ2	NACHT, LRR and PYD domains-containing protein 2 OS=Homo sapiens OX=9606 GN=NLRP2 PE=1 SV=1	61	120.4	6.07
P35908	Keratin, type II cytoskeletal 2 epidermal OS=Homo sapiens OX=9606 GN=KRT2 PE=1 SV=2	79	65.4	8
P50570	Dynamin-2 OS=Homo sapiens OX=9606 GN=DNM2 PE=1 SV=2	64	98	7.44
A0A2R8YCH5	Catenin beta-1 (Fragment) OS=Homo sapiens OX=9606 GN=CTNNB1 PE=1 SV=1	65	85.2	5.92
A0A024R0Y2	Acetyl-CoA carboxylase 1 OS=Homo sapiens OX=9606 GN=hCG_30204 PE=4 SV=1	43	257.1	6.61
P53621	Coatomer subunit alpha OS=Homo sapiens OX=9606 GN=COPA PE=1 SV=2	52	138.3	7.66
Q53GE9	Elongation factor 1-alpha (Fragment) OS=Homo sapiens OX=9606 PE=2 SV=1	65	50.1	9.01
Q9H6S3	Epidermal growth factor receptor kinase substrate 8-like protein 2 OS=Homo sapiens OX=9606 GN=EPS8L2 PE=1 SV=2	66	80.6	6.84
A0A1B0GVI3	Keratin, type I cytoskeletal 10 OS=Homo sapiens OX=9606 GN=KRT10 PE=1 SV=2	53	63.3	5.26
O75146	Huntingtin-interacting protein 1-related protein OS=Homo sapiens OX=9606 GN=HIP1R PE=1 SV=2	52	119.3	6.67
B4E162	cDNA FLJ56281, highly similar to 6-phosphofructokinase, muscle type OS=Homo sapiens OX=9606 PE=2 SV=1	54	66.7	8.48
Q86Y56	Dynein axonemal assembly factor 5 OS=Homo sapiens OX=9606 GN=DNAAF5 PE=1 SV=4	67	93.5	6.42
Q9Y2L1	Exosome complex exonuclease RRP44 OS=Homo sapiens OX=9606 GN=DIS3 PE=1 SV=2	63	108.9	7.14
B4DJ30	cDNA FLJ61290, highly similar to Neutral alpha-glucosidase AB OS=Homo sapiens OX=9606 PE=2 SV=1	56	112.9	6.06
B3KMC9	5'-3' exoribonuclease OS=Homo sapiens OX=9606 PE=2 SV=1	60	108.5	7.47
Q12931	Heat shock protein 75 kDa, mitochondrial OS=Homo sapiens OX=9606 GN=TRAP1 PE=1 SV=3	58	80.1	8.21
A0A494C0R8	Clustered mitochondria protein homolog OS=Homo sapiens OX=9606 GN=CLUH PE=1 SV=1	46	150.4	6.11
O60841	Eukaryotic translation initiation factor 5B OS=Homo sapiens OX=9606 GN=EIF5B PE=1 SV=4	38	138.7	5.49
Q99460	26S proteasome non-ATPase regulatory subunit 1 OS=Homo sapiens OX=9606 GN=PSMD1 PE=1 SV=2	51	105.8	5.39
P35527	Keratin, type I cytoskeletal 9 OS=Homo sapiens OX=9606 GN=KRT9 PE=1 SV=3	77	62	5.24
A8QI98	DIS3 OS=Homo sapiens OX=9606 PE=2 SV=1	62	109	7.14
A0A384P5S9	Epididymis secretory sperm binding protein OS=Homo sapiens OX=9606 PE=2 SV=1	32	282.1	5.34
P49736	DNA replication licensing factor MCM2 OS=Homo sapiens OX=9606 GN=MCM2 PE=1 SV=4	50	101.8	5.52
H7BXY3	RNA helicase OS=Homo sapiens OX=9606 GN=DHX30 PE=1 SV=1	56	130.5	8.56
Q92621	Nuclear pore complex protein Nup205 OS=Homo sapiens OX=9606 GN=NUP205 PE=1 SV=3	39	227.8	6.19
Q05397	Focal adhesion kinase 1 OS=Homo sapiens OX=9606 GN=PTK2 PE=1 SV=2	59	119.2	6.62
Q15418	Ribosomal protein S6 kinase alpha-1 OS=Homo sapiens OX=9606 GN=RPS6KA1 PE=1 SV=2	62	82.7	7.83
O00159	Unconventional myosin-Ic OS=Homo sapiens OX=9606 GN=MYO1C PE=1 SV=4	51	121.6	9.41
Q12788	Transducin beta-like protein 3 OS=Homo sapiens OX=9606 GN=TBL3 PE=1 SV=2	63	89	6.9
Q9Y678	Coatomer subunit gamma-1 OS=Homo sapiens OX=9606 GN=COPG1 PE=1 SV=1	64	97.7	5.47
A0A090N8Y2	Protein disulfide-isomerase A4 OS=Homo sapiens OX=9606 GN=ERP70 PE=2 SV=1	62	72.9	5.07
A0A024R1N1	Myosin, heavy polypeptide 9, non-muscle, isoform CRA_a OS=Homo sapiens OX=9606 GN=MYH9 PE=3 SV=1	33	226.4	5.6
Q9Y4E8	Ubiquitin carboxyl-terminal hydrolase 15 OS=Homo sapiens OX=9606 GN=USP15 PE=1 SV=3	56	112.3	5.22
Q9Y5L0	Transportin-3 OS=Homo sapiens OX=9606 GN=TNPO3 PE=1 SV=3	57	104.1	5.57
Q8TEX9	Importin-4 OS=Homo sapiens OX=9606 GN=IPO4 PE=1 SV=2	54	118.6	4.96
Q9H0A0	RNA cytidine acetyltransferase OS=Homo sapiens OX=9606 GN=NAT10 PE=1 SV=2	60	115.7	8.27
B2R659	cDNA, FLJ92803, highly similar to Homo sapiens hydroxysteroid (17-beta) dehydrogenase 4 (HSD17B4), mRNA OS=Homo sapiens OX=9606 PE=2 SV=1	67	79.6	8.9
B2R8R5	cDNA, FLJ94025, highly similar to Homo sapiens tripartite motif-containing 28 (TRIM28), mRNA OS=Homo sapiens OX=9606 PE=2 SV=1	64	88.5	5.77
Q92945	Far upstream element-binding protein 2 OS=Homo sapiens OX=9606 GN=KHSRP PE=1 SV=4	59	73.1	7.3
P49368	T-complex protein 1 subunit gamma OS=Homo sapiens OX=9606 GN=CCT3 PE=1 SV=4	76	60.5	6.49
A0A1U9X9D5	Valyl-tRNA synthetase OS=Homo sapiens OX=9606 PE=3 SV=2	48	140.4	7.59
A0A0S2Z487	Junction plakoglobin (Fragment) OS=Homo sapiens OX=9606 GN=JUP PE=2 SV=1	67	81.7	6.14
Q9BV61	TRAP1 protein (Fragment) OS=Homo sapiens OX=9606 GN=TRAP1 PE=2 SV=2	55	79.3	7.8
G5E9A6	Ubiquitin carboxyl-terminal hydrolase OS=Homo sapiens OX=9606 GN=USP11 PE=1 SV=1	61	105	5.33
P29401	Transketolase OS=Homo sapiens OX=9606 GN=TKT PE=1 SV=3	79	67.8	7.66
Q96P70	Importin-9 OS=Homo sapiens OX=9606 GN=IPO9 PE=1 SV=3	45	115.9	4.81
Q86XP3	ATP-dependent RNA helicase DDX42 OS=Homo sapiens OX=9606 GN=DDX42 PE=1 SV=1	59	102.9	7.02
A0A087WZ13	Ribonucleoprotein PTB-binding 1 OS=Homo sapiens OX=9606 GN=RAVER1 PE=1 SV=1	76	77.8	8.84
Q29RF7	Sister chromatid cohesion protein PDS5 homolog A OS=Homo sapiens OX=9606 GN=PDS5A PE=1 SV=1	42	150.7	7.91
E9PKU7	Neutral alpha-glucosidase AB OS=Homo sapiens OX=9606 GN=GANAB PE=1 SV=1	59	96.5	5.94
B4E022	cDNA FLJ56274, highly similar to Transketolase OS=Homo sapiens OX=9606 PE=2 SV=1	81	62.8	7.52
D6REX3	Protein transport protein Sec31A OS=Homo sapiens OX=9606 GN=SEC31A PE=1 SV=1	44	136.1	6.98
O00429	Dynamin-1-like protein OS=Homo sapiens OX=9606 GN=DNM1L PE=1 SV=2	63	81.8	6.81
P19367	Hexokinase-1 OS=Homo sapiens OX=9606 GN=HK1 PE=1 SV=3	54	102.4	6.8
Q14566	DNA replication licensing factor MCM6 OS=Homo sapiens OX=9606 GN=MCM6 PE=1 SV=1	55	92.8	5.41
P47897	Glutamine--tRNA ligase OS=Homo sapiens OX=9606 GN=QARS1 PE=1 SV=1	69	87.7	7.15
Q86TI2	Dipeptidyl peptidase 9 OS=Homo sapiens OX=9606 GN=DPP9 PE=1 SV=3	61	98.2	6.46
B4DT15	ElaC homolog protein 2 OS=Homo sapiens OX=9606 PE=2 SV=1	66	90.5	7.74
D3DUW7	Dynamin-1-like protein OS=Homo sapiens OX=9606 GN=DNM1L PE=3 SV=1	60	84	8.79
P07814	Bifunctional glutamate/proline--tRNA ligase OS=Homo sapiens OX=9606 GN=EPRS1 PE=1 SV=5	48	170.5	7.33
V9HWB4	78 kDa glucose-regulated protein OS=Homo sapiens OX=9606 GN=HEL-S-89n PE=2 SV=1	65	72.3	5.16
Q9UKV8	Protein argonaute-2 OS=Homo sapiens OX=9606 GN=AGO2 PE=1 SV=3	60	97.1	9.19
P52789	Hexokinase-2 OS=Homo sapiens OX=9606 GN=HK2 PE=1 SV=2	51	102.3	6.05
O75369	Filamin-B OS=Homo sapiens OX=9606 GN=FLNB PE=1 SV=2	29	278	5.73
B3KTB3	cDNA FLJ37987 fis, clone CTONG2011429, highly similar to Importin-4 OS=Homo sapiens OX=9606 PE=2 SV=1	57	103.2	4.81
E9PDF6	Unconventional myosin-Ib OS=Homo sapiens OX=9606 GN=MYO1B PE=1 SV=1	49	128.4	9.31
P07437	Tubulin beta chain OS=Homo sapiens OX=9606 GN=TUBB PE=1 SV=2	82	49.6	4.89
Q14315	Filamin-C OS=Homo sapiens OX=9606 GN=FLNC PE=1 SV=3	28	290.8	5.97
P52948	Nuclear pore complex protein Nup98-Nup96 OS=Homo sapiens OX=9606 GN=NUP98 PE=1 SV=4	35	197.5	6.4
O95782	AP-2 complex subunit alpha-1 OS=Homo sapiens OX=9606 GN=AP2A1 PE=1 SV=3	61	107.5	7.03
B0AZQ4	Structural maintenance of chromosomes protein OS=Homo sapiens OX=9606 PE=2 SV=1	43	141.4	7.18
Q9UHD8	Septin-9 OS=Homo sapiens OX=9606 GN=SEPTIN9 PE=1 SV=2	66	65.4	8.97
Q8IZ29	Tubulin beta chain OS=Homo sapiens OX=9606 GN=TUBB2C PE=2 SV=1	82	49.8	4.92
P55072	Transitional endoplasmic reticulum ATPase OS=Homo sapiens OX=9606 GN=VCP PE=1 SV=4	65	89.3	5.26
B2R9K8	cDNA, FLJ94440, highly similar to Homo sapiens chaperonin containing TCP1, subunit 6A (zeta 1)(CCT6A), mRNA OS=Homo sapiens OX=9606 PE=2 SV=1	75	57.9	6.8
H0Y938	Coatomer subunit beta' OS=Homo sapiens OX=9606 GN=COPB2 PE=1 SV=2	66	101.5	5.82
O95486	Protein transport protein Sec24A OS=Homo sapiens OX=9606 GN=SEC24A PE=1 SV=2	49	119.7	7.66
Q71U36	Tubulin alpha-1A chain OS=Homo sapiens OX=9606 GN=TUBA1A PE=1 SV=1	75	50.1	5.06
P22102	Trifunctional purine biosynthetic protein adenosine-3 OS=Homo sapiens OX=9606 GN=GART PE=1 SV=1	58	107.7	6.7
A0A024R8V0	Septin 9, isoform CRA_a OS=Homo sapiens OX=9606 GN=SEPT9 PE=3 SV=1	69	63.6	8.4
Q9Y3L3	SH3 domain-binding protein 1 OS=Homo sapiens OX=9606 GN=SH3BP1 PE=1 SV=3	63	75.7	6.77
Q5VTR2	E3 ubiquitin-protein ligase BRE1A OS=Homo sapiens OX=9606 GN=RNF20 PE=1 SV=2	55	113.6	5.94
P41252	Isoleucine--tRNA ligase, cytoplasmic OS=Homo sapiens OX=9606 GN=IARS1 PE=1 SV=2	47	144.4	6.15
B1AXG1	Non-specific serine/threonine protein kinase OS=Homo sapiens OX=9606 GN=RPS6KA3 PE=1 SV=2	64	80.7	8.28
A0A024R1A3	Ubiquitin-activating enzyme E1 OS=Homo sapiens OX=9606 GN=UBE1 PE=2 SV=1	54	117.8	5.76
F5H5D3	Tubulin alpha chain OS=Homo sapiens OX=9606 GN=TUBA1C PE=1 SV=1	66	57.7	5.07
Q99832	T-complex protein 1 subunit eta OS=Homo sapiens OX=9606 GN=CCT7 PE=1 SV=2	75	59.3	7.65
A0A024R0E2	Cold shock domain containing E1, RNA-binding, isoform CRA_a OS=Homo sapiens OX=9606 GN=CSDE1 PE=4 SV=1	57	88.8	6.25
A0A6Q8PFJ0	Prelamin-A/C OS=Homo sapiens OX=9606 GN=LMNA PE=1 SV=1	64	80.9	8.27
P17987	T-complex protein 1 subunit alpha OS=Homo sapiens OX=9606 GN=TCP1 PE=1 SV=1	78	60.3	6.11
A0A024R0K2	Cold shock domain containing E1, RNA-binding, isoform CRA_b OS=Homo sapiens OX=9606 GN=CSDE1 PE=4 SV=1	60	85.7	6.2
Q9UKN8	General transcription factor 3C polypeptide 4 OS=Homo sapiens OX=9606 GN=GTF3C4 PE=1 SV=2	65	91.9	6.65
Q9H269	Vacuolar protein sorting-associated protein 16 homolog OS=Homo sapiens OX=9606 GN=VPS16 PE=1 SV=2	62	94.6	6.77
Q53HR1	Eukaryotic translation elongation factor 1 alpha 1 variant (Fragment) OS=Homo sapiens OX=9606 PE=2 SV=1	70	39.2	8.84
Q9ULE6	Paladin OS=Homo sapiens OX=9606 GN=PALD1 PE=1 SV=3	64	96.7	6.54
Q8IUB0	CTCL tumor antigen HD-CL-08 OS=Homo sapiens OX=9606 PE=2 SV=1	70	38.6	8.85
O00116	Alkyldihydroxyacetonephosphate synthase, peroxisomal OS=Homo sapiens OX=9606 GN=AGPS PE=1 SV=1	70	72.9	7.34
Q9Y446	Plakophilin-3 OS=Homo sapiens OX=9606 GN=PKP3 PE=1 SV=1	56	87	9.32
A0A1Y0BRN0	Unconventional myosin-6 OS=Homo sapiens OX=9606 GN=Myo6-008 PE=2 SV=1	48	146.9	8.56
A0A024R4U3	Tubulin tyrosine ligase-like family, member 12, isoform CRA_a OS=Homo sapiens OX=9606 GN=TTLL12 PE=4 SV=1	61	74.4	5.53
Q5JPE7	Nodal modulator 2 OS=Homo sapiens OX=9606 GN=NOMO2 PE=1 SV=1	52	139.4	5.76
Q9UNX4	WD repeat-containing protein 3 OS=Homo sapiens OX=9606 GN=WDR3 PE=1 SV=1	61	106	6.64
O95373	Importin-7 OS=Homo sapiens OX=9606 GN=IPO7 PE=1 SV=1	46	119.4	4.82
P52735	Guanine nucleotide exchange factor VAV2 OS=Homo sapiens OX=9606 GN=VAV2 PE=1 SV=2	50	101.2	7.08
Q5JP53	Tubulin beta chain OS=Homo sapiens OX=9606 GN=TUBB PE=1 SV=1	81	47.7	4.81
P04350	Tubulin beta-4A chain OS=Homo sapiens OX=9606 GN=TUBB4A PE=1 SV=2	80	49.6	4.88
J3KR97	Tubulin-specific chaperone D OS=Homo sapiens OX=9606 GN=TBCD PE=1 SV=1	51	136.5	6.34
Q59EC0	Adenosine deaminase, RNA-specific isoform ADAR-a variant (Fragment) OS=Homo sapiens OX=9606 PE=2 SV=1	41	137.7	8.48
B3KU28	Lon protease homolog, mitochondrial OS=Homo sapiens OX=9606 GN=LONP1 PE=2 SV=1	63	95.1	6.27
Q01970	1-phosphatidylinositol 4,5-bisphosphate phosphodiesterase beta-3 OS=Homo sapiens OX=9606 GN=PLCB3 PE=1 SV=2	44	138.7	5.9
Q9NVH2	Integrator complex subunit 7 OS=Homo sapiens OX=9606 GN=INTS7 PE=1 SV=1	51	106.8	8.02
A0A7P0TAE1	Endoplasmin OS=Homo sapiens OX=9606 GN=HSP90B1 PE=4 SV=1	46	90.7	5.24
P06737	Glycogen phosphorylase, liver form OS=Homo sapiens OX=9606 GN=PYGL PE=1 SV=4	54	97.1	7.17
Q9NVI1	Fanconi anemia group I protein OS=Homo sapiens OX=9606 GN=FANCI PE=1 SV=4	44	149.2	6.74
O43143	Pre-mRNA-splicing factor ATP-dependent RNA helicase DHX15 OS=Homo sapiens OX=9606 GN=DHX15 PE=1 SV=2	48	90.9	7.46
P07384	Calpain-1 catalytic subunit OS=Homo sapiens OX=9606 GN=CAPN1 PE=1 SV=1	64	81.8	5.67
Q12768	WASH complex subunit 5 OS=Homo sapiens OX=9606 GN=WASHC5 PE=1 SV=1	49	134.2	6.98
O94973	AP-2 complex subunit alpha-2 OS=Homo sapiens OX=9606 GN=AP2A2 PE=1 SV=2	58	103.9	6.96
O95487	Protein transport protein Sec24B OS=Homo sapiens OX=9606 GN=SEC24B PE=1 SV=2	36	137.3	6.67
Q96JH7	Deubiquitinating protein VCPIP1 OS=Homo sapiens OX=9606 GN=VCPIP1 PE=1 SV=2	46	134.2	7.2
A0A024R1T9	ATP-citrate synthase OS=Homo sapiens OX=9606 GN=ACLY PE=3 SV=1	53	120.8	7.33
A0A024R9L1	RNA helicase aquarius OS=Homo sapiens OX=9606 GN=AQR PE=3 SV=1	43	171.2	6.37
O75843	AP-1 complex subunit gamma-like 2 OS=Homo sapiens OX=9606 GN=AP1G2 PE=1 SV=1	47	87.1	6.55
Q00653	Nuclear factor NF-kappa-B p100 subunit OS=Homo sapiens OX=9606 GN=NFKB2 PE=1 SV=4	51	96.7	6.25
V9HW96	CCT-beta OS=Homo sapiens OX=9606 GN=HEL-S-100n PE=2 SV=1	70	57.5	6.46
B3KM89	cDNA FLJ10528 fis, clone NT2RP2000943, highly similar to Protein transport protein Sec24D OS=Homo sapiens OX=9606 PE=2 SV=1	56	100.2	6.93
W8QEH3	Lamin A/C OS=Homo sapiens OX=9606 GN=LMNA PE=3 SV=1	67	65.1	6.84
Q6NUR7	Ezrin OS=Homo sapiens OX=9606 GN=EZR PE=2 SV=1	51	69.2	6.27
Q14008	Cytoskeleton-associated protein 5 OS=Homo sapiens OX=9606 GN=CKAP5 PE=1 SV=3	34	225.4	7.8
Q96N67	Dedicator of cytokinesis protein 7 OS=Homo sapiens OX=9606 GN=DOCK7 PE=1 SV=4	33	242.4	6.8
P05787	Keratin, type II cytoskeletal 8 OS=Homo sapiens OX=9606 GN=KRT8 PE=1 SV=7	72	53.7	5.59
Q9NRZ9	Lymphoid-specific helicase OS=Homo sapiens OX=9606 GN=HELLS PE=1 SV=1	54	97	7.93
Q12929	Epidermal growth factor receptor kinase substrate 8 OS=Homo sapiens OX=9606 GN=EPS8 PE=1 SV=1	55	91.8	7.5
Q9NSE4	Isoleucine--tRNA ligase, mitochondrial OS=Homo sapiens OX=9606 GN=IARS2 PE=1 SV=2	53	113.7	7.2
V9HW22	Epididymis luminal protein 33 OS=Homo sapiens OX=9606 GN=HEL-S-72p PE=2 SV=1	58	70.9	5.52
Q8WVB6	Chromosome transmission fidelity protein 18 homolog OS=Homo sapiens OX=9606 GN=CHTF18 PE=1 SV=1	44	107.3	7.21
H7BXI1	Extended synaptotagmin-2 OS=Homo sapiens OX=9606 GN=ESYT2 PE=1 SV=2	50	96.3	8.43
Q68E01	Integrator complex subunit 3 OS=Homo sapiens OX=9606 GN=INTS3 PE=1 SV=1	43	118	5.8
Q96QK1	Vacuolar protein sorting-associated protein 35 OS=Homo sapiens OX=9606 GN=VPS35 PE=1 SV=2	44	91.6	5.49
Q8N1F7	Nuclear pore complex protein Nup93 OS=Homo sapiens OX=9606 GN=NUP93 PE=1 SV=2	66	93.4	5.72
A0A024R0R1	Rho guanine nucleotide exchange factor (GEF) 1, isoform CRA_e OS=Homo sapiens OX=9606 GN=ARHGEF1 PE=4 SV=1	43	102.4	5.66
P20700	Lamin-B1 OS=Homo sapiens OX=9606 GN=LMNB1 PE=1 SV=2	62	66.4	5.16
Q9Y6Y8	SEC23-interacting protein OS=Homo sapiens OX=9606 GN=SEC23IP PE=1 SV=1	35	111	5.54
Q9Y2D4	Exocyst complex component 6B OS=Homo sapiens OX=9606 GN=EXOC6B PE=1 SV=3	60	94.1	6.46
Q15386	Ubiquitin-protein ligase E3C OS=Homo sapiens OX=9606 GN=UBE3C PE=1 SV=3	47	123.8	6.71
Q05639	Elongation factor 1-alpha 2 OS=Homo sapiens OX=9606 GN=EEF1A2 PE=1 SV=1	56	50.4	9.03
X5DNP5	General transcription factor IIi isoform B (Fragment) OS=Homo sapiens OX=9606 GN=GTF2I PE=2 SV=1	46	110.2	6.74
A0A6I8PIV1	Leucyl-tRNA synthetase OS=Homo sapiens OX=9606 GN=LARS1 PE=1 SV=1	43	134.3	7.2
P68366	Tubulin alpha-4A chain OS=Homo sapiens OX=9606 GN=TUBA4A PE=1 SV=1	65	49.9	5.06
Q9H583	HEAT repeat-containing protein 1 OS=Homo sapiens OX=9606 GN=HEATR1 PE=1 SV=3	31	242.2	6.54
A8K5Y7	cDNA FLJ78655, highly similar to Homo sapiens exportin 5 (XPO5), mRNA OS=Homo sapiens OX=9606 PE=2 SV=1	48	136.2	5.9
D3DTH7	Myosin IC, isoform CRA_a OS=Homo sapiens OX=9606 GN=MYO1C PE=3 SV=1	50	98.9	9.42
B7Z8N7	Cytoplasmic FMR1-interacting protein OS=Homo sapiens OX=9606 PE=2 SV=1	40	142.5	7.03
Q9UHD2	Serine/threonine-protein kinase TBK1 OS=Homo sapiens OX=9606 GN=TBK1 PE=1 SV=1	68	83.6	6.79
Q10567	AP-1 complex subunit beta-1 OS=Homo sapiens OX=9606 GN=AP1B1 PE=1 SV=2	42	104.6	5.06
Q9UBF2	Coatomer subunit gamma-2 OS=Homo sapiens OX=9606 GN=COPG2 PE=1 SV=1	58	97.6	5.81
B7ZLC9	GEMIN5 protein OS=Homo sapiens OX=9606 GN=GEMIN5 PE=2 SV=1	38	168.3	6.62
Q08945	FACT complex subunit SSRP1 OS=Homo sapiens OX=9606 GN=SSRP1 PE=1 SV=1	50	81	6.87
B3KTS4	cDNA FLJ38665 fis, clone HLUNG2003378, highly similar to Rho guanine nucleotide exchange factor 16 OS=Homo sapiens OX=9606 PE=2 SV=1	61	80.1	7.52
B4E0X8	cDNA FLJ61021, highly similar to Far upstream element-binding protein 1 OS=Homo sapiens OX=9606 PE=2 SV=1	53	66.2	7.56
Q93008	Probable ubiquitin carboxyl-terminal hydrolase FAF-X OS=Homo sapiens OX=9606 GN=USP9X PE=1 SV=4	26	290.3	5.8
Q9UHB6	LIM domain and actin-binding protein 1 OS=Homo sapiens OX=9606 GN=LIMA1 PE=1 SV=1	49	85.2	6.84
A0A3B3IRQ9	Double-stranded RNA-specific adenosine deaminase (Fragment) OS=Homo sapiens OX=9606 GN=ADAR PE=1 SV=1	41	128.3	8.62
Q92797	Symplekin OS=Homo sapiens OX=9606 GN=SYMPK PE=1 SV=2	43	141.1	6.13
Q5VV41	Rho guanine nucleotide exchange factor 16 OS=Homo sapiens OX=9606 GN=ARHGEF16 PE=1 SV=1	60	80.1	7.36
O60231	Pre-mRNA-splicing factor ATP-dependent RNA helicase DHX16 OS=Homo sapiens OX=9606 GN=DHX16 PE=1 SV=2	40	119.2	6.8
Q9C0E2	Exportin-4 OS=Homo sapiens OX=9606 GN=XPO4 PE=1 SV=2	49	130.1	5.05
A0A024DAK3	RNA-specific adenosine deaminase OS=Homo sapiens OX=9606 PE=2 SV=1	38	135.9	8.56
Q15031	Probable leucine--tRNA ligase, mitochondrial OS=Homo sapiens OX=9606 GN=LARS2 PE=1 SV=2	49	101.9	8.22
O60264	SWI/SNF-related matrix-associated actin-dependent regulator of chromatin subfamily A member 5 OS=Homo sapiens OX=9606 GN=SMARCA5 PE=1 SV=1	41	121.8	8.09
B3KMS0	Condensin complex subunit 1 OS=Homo sapiens OX=9606 PE=2 SV=1	39	157.1	6.61
Q59GQ7	SWI/SNF-related matrix-associated actin-dependent regulator of chromatin a3 variant (Fragment) OS=Homo sapiens OX=9606 PE=2 SV=1	49	111.9	8.68
Q12906	Interleukin enhancer-binding factor 3 OS=Homo sapiens OX=9606 GN=ILF3 PE=1 SV=3	49	95.3	8.76
P48643	T-complex protein 1 subunit epsilon OS=Homo sapiens OX=9606 GN=CCT5 PE=1 SV=1	71	59.6	5.66
P56192	Methionine--tRNA ligase, cytoplasmic OS=Homo sapiens OX=9606 GN=MARS1 PE=1 SV=2	49	101.1	6.16
P50416	Carnitine O-palmitoyltransferase 1, liver isoform OS=Homo sapiens OX=9606 GN=CPT1A PE=1 SV=2	46	88.3	8.65
P42345	Serine/threonine-protein kinase mTOR OS=Homo sapiens OX=9606 GN=MTOR PE=1 SV=1	25	288.7	7.17
J3QRV5	LLGL scribble cell polarity complex component 2 OS=Homo sapiens OX=9606 GN=LLGL2 PE=1 SV=1	42	113.3	7.52
Q96AE4	Far upstream element-binding protein 1 OS=Homo sapiens OX=9606 GN=FUBP1 PE=1 SV=3	52	67.5	7.61
A0A494BZW2	Lipopolysaccharide-responsive and beige-like anchor protein (Fragment) OS=Homo sapiens OX=9606 GN=LRBA PE=1 SV=1	26	232.9	5.15
J9R021	Eukaryotic translation initiation factor 3 subunit A OS=Homo sapiens OX=9606 GN=eIF3a PE=2 SV=1	30	166.4	6.79
P50991	T-complex protein 1 subunit delta OS=Homo sapiens OX=9606 GN=CCT4 PE=1 SV=4	62	57.9	7.83
Q12769	Nuclear pore complex protein Nup160 OS=Homo sapiens OX=9606 GN=NUP160 PE=1 SV=3	37	162	5.5
P49792	E3 SUMO-protein ligase RanBP2 OS=Homo sapiens OX=9606 GN=RANBP2 PE=1 SV=2	17	358	6.2
A0A0S2Z5J4	Adaptor-related protein complex 3 beta 1 subunit isoform 1 (Fragment) OS=Homo sapiens OX=9606 GN=AP3B1 PE=2 SV=1	45	121.2	6.04
Q14C86	GTPase-activating protein and VPS9 domain-containing protein 1 OS=Homo sapiens OX=9606 GN=GAPVD1 PE=1 SV=2	33	164.9	5.22
A0A024R1K8	Splicing factor 3a, subunit 1, 120kDa, isoform CRA_a OS=Homo sapiens OX=9606 GN=SF3A1 PE=4 SV=1	49	88.8	5.22
Q4KMR3	MYO1E variant protein OS=Homo sapiens OX=9606 GN=MYO1E PE=2 SV=1	55	127	8.92
V9HWB8	Pyruvate kinase OS=Homo sapiens OX=9606 GN=HEL-S-30 PE=2 SV=1	69	57.9	7.84
O00267	Transcription elongation factor SPT5 OS=Homo sapiens OX=9606 GN=SUPT5H PE=1 SV=1	39	120.9	5.06
Q9NVE7	4'-phosphopantetheine phosphatase OS=Homo sapiens OX=9606 GN=PANK4 PE=1 SV=1	57	85.9	6.28
B3GQS7	60 kDa chaperonin OS=Homo sapiens OX=9606 GN=HSPD1 PE=2 SV=1	60	60.6	6.04
O94832	Unconventional myosin-Id OS=Homo sapiens OX=9606 GN=MYO1D PE=1 SV=2	48	116.1	9.39
Q6PD62	RNA polymerase-associated protein CTR9 homolog OS=Homo sapiens OX=9606 GN=CTR9 PE=1 SV=1	38	133.4	6.77
Q96LD4	E3 ubiquitin-protein ligase TRIM47 OS=Homo sapiens OX=9606 GN=TRIM47 PE=1 SV=2	60	69.5	6.44
O75448	Mediator of RNA polymerase II transcription subunit 24 OS=Homo sapiens OX=9606 GN=MED24 PE=1 SV=1	48	110.2	6.95
Q9H1B7	Probable E3 ubiquitin-protein ligase IRF2BPL OS=Homo sapiens OX=9606 GN=IRF2BPL PE=1 SV=1	48	82.6	8.24
A0A024R1S5	GTP-binding protein 1 OS=Homo sapiens OX=9606 GN=GTPBP1 PE=4 SV=1	57	71.4	8.22
Q9H2M9	Rab3 GTPase-activating protein non-catalytic subunit OS=Homo sapiens OX=9606 GN=RAB3GAP2 PE=1 SV=1	44	155.9	5.62
A0A384MR33	Structural maintenance of chromosomes protein OS=Homo sapiens OX=9606 GN=SMC1L1 PE=2 SV=1	36	143.1	7.64
O43156	TELO2-interacting protein 1 homolog OS=Homo sapiens OX=9606 GN=TTI1 PE=1 SV=3	46	122	5.97
Q9HBB9	HC56 OS=Homo sapiens OX=9606 PE=4 SV=1	47	118.7	6.14
F5GY88	Mediator complex subunit 24 OS=Homo sapiens OX=9606 GN=MED24 PE=1 SV=2	48	112.1	7.03
A0A024R821	Eukaryotic translation initiation factor 3 subunit B OS=Homo sapiens OX=9606 GN=EIF3S9 PE=3 SV=1	52	92.4	5
Q9NVP1	ATP-dependent RNA helicase DDX18 OS=Homo sapiens OX=9606 GN=DDX18 PE=1 SV=2	58	75.4	9.5
P40763	Signal transducer and activator of transcription 3 OS=Homo sapiens OX=9606 GN=STAT3 PE=1 SV=2	57	88	6.3
A0A0G2JIW1	Heat shock 70 kDa protein 1B OS=Homo sapiens OX=9606 GN=HSPA1B PE=1 SV=1	57	70.1	5.66
A0A024R179	Nuclear cap binding protein subunit 1, 80kDa, isoform CRA_a OS=Homo sapiens OX=9606 GN=NCBP1 PE=3 SV=1	44	91.8	6.43
Q12979	Active breakpoint cluster region-related protein OS=Homo sapiens OX=9606 GN=ABR PE=1 SV=2	53	97.5	6.55
A2NX49	Acetyl-CoA carboxylase 1 OS=Homo sapiens OX=9606 PE=2 SV=1	25	264.4	6.46
A0A090N7Y2	ATP-binding cassette, sub-family F (GCN20), member 2 OS=Homo sapiens OX=9606 GN=ABCF2 PE=4 SV=1	47	72.4	7.49
B4DJ53	Dynamin GTPase OS=Homo sapiens OX=9606 PE=2 SV=1	57	67.9	7.91
A0A1W2PNX8	Protein unc-45 homolog A OS=Homo sapiens OX=9606 GN=UNC45A PE=1 SV=1	43	118.3	6.71
Q9BSJ2	Gamma-tubulin complex component 2 OS=Homo sapiens OX=9606 GN=TUBGCP2 PE=1 SV=2	56	102.5	6.84
B4E365	cDNA FLJ56210, highly similar to Zinc phosphodiesterase ELAC protein 2 OS=Homo sapiens OX=9606 PE=2 SV=1	62	70	7.01
Q9BWH6	RNA polymerase II-associated protein 1 OS=Homo sapiens OX=9606 GN=RPAP1 PE=1 SV=3	35	152.7	6.38
Q16891	MICOS complex subunit MIC60 OS=Homo sapiens OX=9606 GN=IMMT PE=1 SV=1	51	83.6	6.48
F8WA11	CLIP-associating protein 1 OS=Homo sapiens OX=9606 GN=CLASP1 PE=1 SV=2	34	162.7	8.72
P11498	Pyruvate carboxylase, mitochondrial OS=Homo sapiens OX=9606 GN=PC PE=1 SV=2	50	129.6	6.84
Q53GX7	Threonyl-tRNA synthetase (Fragment) OS=Homo sapiens OX=9606 PE=2 SV=1	63	83.4	6.67
P46013	Proliferation marker protein Ki-67 OS=Homo sapiens OX=9606 GN=MKI67 PE=1 SV=2	24	358.5	9.45
Q13885	Tubulin beta-2A chain OS=Homo sapiens OX=9606 GN=TUBB2A PE=1 SV=1	63	49.9	4.89
B4E0Q9	Protein transport protein SEC23 OS=Homo sapiens OX=9606 PE=2 SV=1	75	45	9.25
P35269	General transcription factor IIF subunit 1 OS=Homo sapiens OX=9606 GN=GTF2F1 PE=1 SV=2	46	58.2	7.49
Q8NE71	ATP-binding cassette sub-family F member 1 OS=Homo sapiens OX=9606 GN=ABCF1 PE=1 SV=2	51	95.9	6.8
Q8WUM0	Nuclear pore complex protein Nup133 OS=Homo sapiens OX=9606 GN=NUP133 PE=1 SV=2	45	128.9	5.1
Q7Z460	CLIP-associating protein 1 OS=Homo sapiens OX=9606 GN=CLASP1 PE=1 SV=1	33	169.3	9.03
P57740	Nuclear pore complex protein Nup107 OS=Homo sapiens OX=9606 GN=NUP107 PE=1 SV=1	53	106.3	5.43
C9J2Y9	DNA-directed RNA polymerase subunit beta OS=Homo sapiens OX=9606 GN=POLR2B PE=1 SV=2	42	133	7.15
Q9NR30	Nucleolar RNA helicase 2 OS=Homo sapiens OX=9606 GN=DDX21 PE=1 SV=5	48	87.3	9.28
Q9NQX3	Gephyrin OS=Homo sapiens OX=9606 GN=GPHN PE=1 SV=1	60	79.7	5.43
P42285	Exosome RNA helicase MTR4 OS=Homo sapiens OX=9606 GN=MTREX PE=1 SV=3	46	117.7	6.52
B7Z4V2	75 kDa glucose-regulated protein OS=Homo sapiens OX=9606 PE=2 SV=1	50	72.4	5.94
Q9BZL6	Serine/threonine-protein kinase D2 OS=Homo sapiens OX=9606 GN=PRKD2 PE=1 SV=3	46	96.7	6.84
Q00839	Heterogeneous nuclear ribonucleoprotein U OS=Homo sapiens OX=9606 GN=HNRNPU PE=1 SV=6	41	90.5	6
Q08J23	RNA cytosine C(5)-methyltransferase NSUN2 OS=Homo sapiens OX=9606 GN=NSUN2 PE=1 SV=2	57	86.4	6.77
B4DZX1	4'-phosphopantetheine phosphatase OS=Homo sapiens OX=9606 PE=2 SV=1	54	81.4	6.16
Q9BPX3	Condensin complex subunit 3 OS=Homo sapiens OX=9606 GN=NCAPG PE=1 SV=1	43	114.3	5.59
P17812	CTP synthase 1 OS=Homo sapiens OX=9606 GN=CTPS1 PE=1 SV=2	55	66.6	6.46
Q9UIA9	Exportin-7 OS=Homo sapiens OX=9606 GN=XPO7 PE=1 SV=3	50	123.8	6.32
O43264	Centromere/kinetochore protein zw10 homolog OS=Homo sapiens OX=9606 GN=ZW10 PE=1 SV=3	59	88.8	6.27
A0A590UJQ1	E3 ubiquitin-protein ligase OS=Homo sapiens OX=9606 GN=ITCH PE=1 SV=1	44	103.1	6.48
A0A384P5T6	Epididymis secretory sperm binding protein OS=Homo sapiens OX=9606 PE=2 SV=1	39	111.3	5.22
O75582	Ribosomal protein S6 kinase alpha-5 OS=Homo sapiens OX=9606 GN=RPS6KA5 PE=1 SV=1	43	89.8	7.11
Q658Y4	Protein FAM91A1 OS=Homo sapiens OX=9606 GN=FAM91A1 PE=1 SV=3	49	93.9	6.39
Q8N1G2	Cap-specific mRNA (nucleoside-2'-O-)-methyltransferase 1 OS=Homo sapiens OX=9606 GN=CMTR1 PE=1 SV=1	51	95.3	7.05
A0A024R5Z9	Pyruvate kinase OS=Homo sapiens OX=9606 GN=PKM2 PE=3 SV=1	63	58	7.71
B2ZZ89	Spectrin beta chain OS=Homo sapiens OX=9606 GN=SPTBN1 PE=2 SV=1	24	274.4	5.57
P08727	Keratin, type I cytoskeletal 19 OS=Homo sapiens OX=9606 GN=KRT19 PE=1 SV=4	78	44.1	5.14
O60568	Multifunctional procollagen lysine hydroxylase and glycosyltransferase LH3 OS=Homo sapiens OX=9606 GN=PLOD3 PE=1 SV=1	53	84.7	6.05
Q9BSP4	PFKL protein (Fragment) OS=Homo sapiens OX=9606 GN=PFKL PE=2 SV=2	51	53.6	8.32
V9HWK0	Signal recognition particle subunit SRP72 OS=Homo sapiens OX=9606 GN=HEL103 PE=2 SV=1	46	74.6	9.26
A0A0S2Z537	E3 ubiquitin protein ligase (Fragment) OS=Homo sapiens OX=9606 GN=RNF40 PE=2 SV=1	42	113.6	6.23
A0A024QZN4	Metavinculin OS=Homo sapiens OX=9606 GN=VCL PE=3 SV=1	44	116.6	6.09
A0A384N5Z8	Epididymis secretory sperm binding protein OS=Homo sapiens OX=9606 PE=2 SV=1	35	76.1	9.44
A0A6Q8PF33	Alanine--tRNA ligase OS=Homo sapiens OX=9606 GN=AARS1 PE=1 SV=1	44	106	5.71
Q13509	Tubulin beta-3 chain OS=Homo sapiens OX=9606 GN=TUBB3 PE=1 SV=2	63	50.4	4.93
A8MXP9	Matrin-3 OS=Homo sapiens OX=9606 GN=MATR3 PE=1 SV=1	43	99.9	6.04
Q02809	Procollagen-lysine,2-oxoglutarate 5-dioxygenase 1 OS=Homo sapiens OX=9606 GN=PLOD1 PE=1 SV=2	57	83.5	6.95
O14936	Peripheral plasma membrane protein CASK OS=Homo sapiens OX=9606 GN=CASK PE=1 SV=3	43	105.1	6.43
B9A6J2	Rab3 GTPase-activating protein catalytic subunit OS=Homo sapiens OX=9606 GN=RAB3GAP1 PE=2 SV=1	38	110.5	5.55
Q5VIR6	Vacuolar protein sorting-associated protein 53 homolog OS=Homo sapiens OX=9606 GN=VPS53 PE=1 SV=2	54	94.3	6.7
A5YKK6	CCR4-NOT transcription complex subunit 1 OS=Homo sapiens OX=9606 GN=CNOT1 PE=1 SV=2	23	266.8	7.11
Q9BXP5	Serrate RNA effector molecule homolog OS=Homo sapiens OX=9606 GN=SRRT PE=1 SV=1	39	100.6	5.96
P12270	Nucleoprotein TPR OS=Homo sapiens OX=9606 GN=TPR PE=1 SV=3	20	267.1	5.02
A3KMH1	von Willebrand factor A domain-containing protein 8 OS=Homo sapiens OX=9606 GN=VWA8 PE=1 SV=2	24	214.7	7.4
H0Y5C6	Filamin-A (Fragment) OS=Homo sapiens OX=9606 GN=FLNA PE=1 SV=1	91	29.8	5.11
I3L4N8	Actin, cytoplasmic 2 OS=Homo sapiens OX=9606 GN=ACTG1 PE=1 SV=9	71	39	5.47
Q9UL18	Protein argonaute-1 OS=Homo sapiens OX=9606 GN=AGO1 PE=1 SV=3	56	97.2	9.16
M0R0K9	Transcription intermediary factor 1-beta (Fragment) OS=Homo sapiens OX=9606 GN=TRIM28 PE=1 SV=1	73	48.4	4.94
Q6N096	Uncharacterized protein DKFZp686I15196 OS=Homo sapiens OX=9606 GN=DKFZp686I15196 PE=2 SV=1	43	50.9	8.06
Q58F09	Glucosidase I OS=Homo sapiens OX=9606 GN=GCS1 PE=2 SV=1	54	91.9	9.01
Q13671	Ras and Rab interactor 1 OS=Homo sapiens OX=9606 GN=RIN1 PE=1 SV=4	51	84	8.02
P49915	GMP synthase [glutamine-hydrolyzing] OS=Homo sapiens OX=9606 GN=GMPS PE=1 SV=1	55	76.7	6.87
Q9NTZ6	RNA-binding protein 12 OS=Homo sapiens OX=9606 GN=RBM12 PE=1 SV=1	31	97.3	8.63
Q08AF3	Schlafen family member 5 OS=Homo sapiens OX=9606 GN=SLFN5 PE=1 SV=1	43	101	8.22
O14617	AP-3 complex subunit delta-1 OS=Homo sapiens OX=9606 GN=AP3D1 PE=1 SV=1	39	130.1	8.48
Q9ULK4	Mediator of RNA polymerase II transcription subunit 23 OS=Homo sapiens OX=9606 GN=MED23 PE=1 SV=2	38	156.4	7.4
Q96JC1	Vam6/Vps39-like protein OS=Homo sapiens OX=9606 GN=VPS39 PE=1 SV=2	53	101.7	6.99
Q13724	Mannosyl-oligosaccharide glucosidase OS=Homo sapiens OX=9606 GN=MOGS PE=1 SV=5	54	91.9	8.9
E9PC69	Non-specific serine/threonine protein kinase OS=Homo sapiens OX=9606 GN=MARK2 PE=1 SV=3	51	86.6	9.64
Q8WX93	Palladin OS=Homo sapiens OX=9606 GN=PALLD PE=1 SV=3	29	150.5	7.09
F5GZS6	4F2 cell-surface antigen heavy chain OS=Homo sapiens OX=9606 GN=SLC3A2 PE=1 SV=1	47	64.8	5.1
A0A2U3TZN6	Peripheral plasma membrane protein CASK OS=Homo sapiens OX=9606 GN=CASK PE=1 SV=1	45	100.1	6.35
P11387	DNA topoisomerase 1 OS=Homo sapiens OX=9606 GN=TOP1 PE=1 SV=2	41	90.7	9.31
B4DKY1	Cysteinyl-tRNA synthetase OS=Homo sapiens OX=9606 GN=CARS1 PE=1 SV=1	45	84.2	7.05
Q8NCN5	Pyruvate dehydrogenase phosphatase regulatory subunit, mitochondrial OS=Homo sapiens OX=9606 GN=PDPR PE=1 SV=2	46	99.3	6.35
Q13617	Cullin-2 OS=Homo sapiens OX=9606 GN=CUL2 PE=1 SV=2	46	86.9	6.92
P05023	Sodium/potassium-transporting ATPase subunit alpha-1 OS=Homo sapiens OX=9606 GN=ATP1A1 PE=1 SV=1	42	112.8	5.49
Q96A65	Exocyst complex component 4 OS=Homo sapiens OX=9606 GN=EXOC4 PE=1 SV=1	43	110.4	6.49
Q9HCE1	Helicase MOV-10 OS=Homo sapiens OX=9606 GN=MOV10 PE=1 SV=2	44	113.6	8.82
A0A024R0Q5	Protein phosphatase 1, regulatory (Inhibitor) subunit 13 like, isoform CRA_a OS=Homo sapiens OX=9606 GN=PPP1R13L PE=4 SV=1	44	89	6.81
O15111	Inhibitor of nuclear factor kappa-B kinase subunit alpha OS=Homo sapiens OX=9606 GN=CHUK PE=1 SV=2	51	84.6	6.73
A0A024R8K7	Integrin beta OS=Homo sapiens OX=9606 GN=ITGB4 PE=3 SV=1	28	194.9	6.1
O43314	Inositol hexakisphosphate and diphosphoinositol-pentakisphosphate kinase 2 OS=Homo sapiens OX=9606 GN=PPIP5K2 PE=1 SV=3	35	140.3	8.22
P50990	T-complex protein 1 subunit theta OS=Homo sapiens OX=9606 GN=CCT8 PE=1 SV=4	69	59.6	5.6
Q9UID3	Vacuolar protein sorting-associated protein 51 homolog OS=Homo sapiens OX=9606 GN=VPS51 PE=1 SV=2	42	86	6.47
A8K2R3	cDNA FLJ75083, highly similar to Homo sapiens amine oxidase (flavin containing) domain 2 (AOF2),mRNA OS=Homo sapiens OX=9606 PE=1 SV=1	52	81.1	6.23
Q6MZM3	Uncharacterized protein DKFZp686C21148 OS=Homo sapiens OX=9606 GN=DKFZp686C21148 PE=2 SV=1	37	141.2	5.4
O94906	Pre-mRNA-processing factor 6 OS=Homo sapiens OX=9606 GN=PRPF6 PE=1 SV=1	40	106.9	8.25
B3KT81	cDNA FLJ37836 fis, clone BRSSN2010587, weakly similar to Homo sapiens MDN1, midasin homolog (yeast) (MDN1), mRNA OS=Homo sapiens OX=9606 PE=2 SV=1	40	114.7	7.65
Q8WUM4	Programmed cell death 6-interacting protein OS=Homo sapiens OX=9606 GN=PDCD6IP PE=1 SV=1	52	96	6.52
Q8TCG1	Protein CIP2A OS=Homo sapiens OX=9606 GN=CIP2A PE=1 SV=2	51	102.1	6.23
Q9NUQ8	ATP-binding cassette sub-family F member 3 OS=Homo sapiens OX=9606 GN=ABCF3 PE=1 SV=2	51	79.7	6.34
B3KMB1	Structural maintenance of chromosomes protein OS=Homo sapiens OX=9606 PE=2 SV=1	36	135.5	8.43
A0A0A0MT01	Actin-depolymerizing factor OS=Homo sapiens OX=9606 GN=GSN PE=1 SV=1	46	84.7	5.83
A0A087X0X3	Heterogeneous nuclear ribonucleoprotein M OS=Homo sapiens OX=9606 GN=HNRNPM PE=1 SV=1	51	77.5	8.78
A0A1P7ZIN0	L-afadin OS=Homo sapiens OX=9606 PE=2 SV=1	26	206.4	6.47
B7Z683	Active breakpoint cluster region-related protein OS=Homo sapiens OX=9606 GN=ABR PE=1 SV=1	53	73.5	7.68
O43592	Exportin-T OS=Homo sapiens OX=9606 GN=XPOT PE=1 SV=2	46	109.9	5.39
M0R2B7	DNA polymerase OS=Homo sapiens OX=9606 GN=POLD1 PE=1 SV=1	38	126.3	7.21
A0A7P0TA76	Long-chain-fatty-acid--CoA ligase 3 OS=Homo sapiens OX=9606 GN=ACSL3 PE=4 SV=1	54	79.6	8.46
A0A024R2X6	Ubiquitin carboxyl-terminal hydrolase OS=Homo sapiens OX=9606 GN=USP4 PE=3 SV=1	44	103.9	5.52
B3KM75	cDNA FLJ10429 fis, clone NT2RP1000413, highly similar to Nck-associated protein 1 OS=Homo sapiens OX=9606 PE=2 SV=1	83	27	5.8
A0A0G2JNH2	Tight junction protein ZO-1 OS=Homo sapiens OX=9606 GN=TJP1 PE=1 SV=1	26	187.7	6.7
Q05CW7	NAT10 protein (Fragment) OS=Homo sapiens OX=9606 GN=NAT10 PE=2 SV=1	59	62.3	9.26
V9HW90	Glutathione reductase OS=Homo sapiens OX=9606 GN=HEL-75 PE=2 SV=1	63	56.2	8.5
Q53GN4	WD repeat domain 1, isoform CRA_a (Fragment) OS=Homo sapiens OX=9606 GN=WDR1 PE=2 SV=1	56	66.1	6.65
B7Z766	cDNA FLJ54564, highly similar to 150 kDa oxygen-regulated protein (Orp150) OS=Homo sapiens OX=9606 PE=2 SV=1	43	94.1	5.01
Q8IX18	Probable ATP-dependent RNA helicase DHX40 OS=Homo sapiens OX=9606 GN=DHX40 PE=1 SV=2	55	88.5	8.65
P54136	Arginine--tRNA ligase, cytoplasmic OS=Homo sapiens OX=9606 GN=RARS1 PE=1 SV=2	53	75.3	6.68
Q5T1Z8	Pumilio homolog 1 OS=Homo sapiens OX=9606 GN=PUM1 PE=1 SV=1	31	130	6.9
Q99570	Phosphoinositide 3-kinase regulatory subunit 4 OS=Homo sapiens OX=9606 GN=PIK3R4 PE=1 SV=3	31	153	7.17
Q8N122	Regulatory-associated protein of mTOR OS=Homo sapiens OX=9606 GN=RPTOR PE=1 SV=1	30	148.9	6.89
B4DPV7	Cysteinyl-tRNA synthetase OS=Homo sapiens OX=9606 PE=2 SV=1	43	92	7.08
Q9C0I1	Myotubularin-related protein 12 OS=Homo sapiens OX=9606 GN=MTMR12 PE=1 SV=2	48	86.1	6.62
Q12996	Cleavage stimulation factor subunit 3 OS=Homo sapiens OX=9606 GN=CSTF3 PE=1 SV=1	50	82.9	8.12
Q8TAF3	WD repeat-containing protein 48 OS=Homo sapiens OX=9606 GN=WDR48 PE=1 SV=1	53	76.2	7.03
A0A024R2J9	TBC1 domain family, member 5, isoform CRA_b OS=Homo sapiens OX=9606 GN=TBC1D5 PE=4 SV=1	45	88.9	6.54
B1AHC9	ATP-dependent DNA helicase 2 subunit 1 OS=Homo sapiens OX=9606 GN=XRCC6 PE=1 SV=1	50	64.2	9.28
A0A2S1ZR79	Structural maintenance of chromosomes 6 OS=Homo sapiens OX=9606 GN=SMC6 PE=2 SV=1	41	126.3	6.99
O43252	Bifunctional 3'-phosphoadenosine 5'-phosphosulfate synthase 1 OS=Homo sapiens OX=9606 GN=PAPSS1 PE=1 SV=2	53	70.8	6.86
B2RBE5	cDNA, FLJ95468, highly similar to Homo sapiens transcriptional coactivator tubedown-100 (TBDN100),transcript variant 1, mRNA OS=Homo sapiens OX=9606 PE=2 SV=1	47	101.2	7.42
Q14157	Ubiquitin-associated protein 2-like OS=Homo sapiens OX=9606 GN=UBAP2L PE=1 SV=2	36	114.5	7.11
Q58EY4	SWI/SNF related, matrix associated, actin dependent regulator of chromatin, subfamily c, member 1 OS=Homo sapiens OX=9606 GN=SMARCC1 PE=2 SV=1	29	122.8	5.72
Q96HW7	Integrator complex subunit 4 OS=Homo sapiens OX=9606 GN=INTS4 PE=1 SV=2	42	108.1	6.44
B3KQT9	Protein disulfide-isomerase OS=Homo sapiens OX=9606 PE=2 SV=1	61	54.1	7.21
Q9H2U1	ATP-dependent DNA/RNA helicase DHX36 OS=Homo sapiens OX=9606 GN=DHX36 PE=1 SV=2	38	114.7	7.68
Q9Y5K6	CD2-associated protein OS=Homo sapiens OX=9606 GN=CD2AP PE=1 SV=1	49	71.4	6.4
Q9Y5B9	FACT complex subunit SPT16 OS=Homo sapiens OX=9606 GN=SUPT16H PE=1 SV=1	33	119.8	5.66
B7Z992	Actin-depolymerizing factor OS=Homo sapiens OX=9606 PE=2 SV=1	48	78.8	6.11
Q9NPI6	mRNA-decapping enzyme 1A OS=Homo sapiens OX=9606 GN=DCP1A PE=1 SV=3	60	63.2	6.25
P34932	Heat shock 70 kDa protein 4 OS=Homo sapiens OX=9606 GN=HSPA4 PE=1 SV=4	41	94.3	5.19
Q09666	Neuroblast differentiation-associated protein AHNAK OS=Homo sapiens OX=9606 GN=AHNAK PE=1 SV=2	14	628.7	6.15
Q8IYB8	ATP-dependent RNA helicase SUPV3L1, mitochondrial OS=Homo sapiens OX=9606 GN=SUPV3L1 PE=1 SV=1	45	87.9	7.99
Q16643	Drebrin OS=Homo sapiens OX=9606 GN=DBN1 PE=1 SV=4	48	71.4	4.45
P02533	Keratin, type I cytoskeletal 14 OS=Homo sapiens OX=9606 GN=KRT14 PE=1 SV=4	55	51.5	5.16
P51114	Fragile X mental retardation syndrome-related protein 1 OS=Homo sapiens OX=9606 GN=FXR1 PE=1 SV=3	49	69.7	6.15
A8MQ02	Afadin OS=Homo sapiens OX=9606 GN=AFDN PE=1 SV=2	25	201.7	6.51
Q5VW36	Focadhesin OS=Homo sapiens OX=9606 GN=FOCAD PE=1 SV=1	25	199.9	6.62
A0A0S2Z392	G protein-coupled receptor kinase (Fragment) OS=Homo sapiens OX=9606 GN=ADRBK1 PE=2 SV=1	51	79.5	7.28
Q14137	Ribosome biogenesis protein BOP1 OS=Homo sapiens OX=9606 GN=BOP1 PE=1 SV=2	53	83.6	6.19
O95817	BAG family molecular chaperone regulator 3 OS=Homo sapiens OX=9606 GN=BAG3 PE=1 SV=3	58	61.6	6.95
Q96SU4	Oxysterol-binding protein-related protein 9 OS=Homo sapiens OX=9606 GN=OSBPL9 PE=1 SV=2	40	83.1	6.18
Q6MZP3	Uncharacterized protein DKFZp686I05169 OS=Homo sapiens OX=9606 GN=DKFZp686I05169 PE=2 SV=1	33	145.6	5.52
B4DEZ1	Exocyst complex component OS=Homo sapiens OX=9606 PE=2 SV=1	44	92.9	6.27
Q9NW82	WD repeat-containing protein 70 OS=Homo sapiens OX=9606 GN=WDR70 PE=1 SV=1	50	73.2	6.33
Q86W92	Liprin-beta-1 OS=Homo sapiens OX=9606 GN=PPFIBP1 PE=1 SV=2	39	114	5.55
Q7Z3J2	VPS35 endosomal protein-sorting factor-like OS=Homo sapiens OX=9606 GN=VPS35L PE=1 SV=2	39	109.5	7.21
A8K8X0	cDNA FLJ75187, highly similar to Homo sapiens nap1 P120 OS=Homo sapiens OX=9606 PE=2 SV=1	37	112.1	6.7
Q9P0K7	Ankycorbin OS=Homo sapiens OX=9606 GN=RAI14 PE=1 SV=2	47	110	6.21
A0A2X0TVR3	ARHGAP12 (Fragment) OS=Homo sapiens OX=9606 GN=ARHGAP12 PE=4 SV=1	40	96	7.44
Q9H089	Large subunit GTPase 1 homolog OS=Homo sapiens OX=9606 GN=LSG1 PE=1 SV=2	50	75.2	6.38
Q15061	WD repeat-containing protein 43 OS=Homo sapiens OX=9606 GN=WDR43 PE=1 SV=3	42	74.8	5.57
Q9Y4R8	Telomere length regulation protein TEL2 homolog OS=Homo sapiens OX=9606 GN=TELO2 PE=1 SV=2	46	91.7	5.76
A0A024RDQ0	Heat shock 110 kDa protein OS=Homo sapiens OX=9606 GN=HSPH1 PE=3 SV=1	46	92.1	5.55
P02786	Transferrin receptor protein 1 OS=Homo sapiens OX=9606 GN=TFRC PE=1 SV=2	44	84.8	6.61
Q14258	E3 ubiquitin/ISG15 ligase TRIM25 OS=Homo sapiens OX=9606 GN=TRIM25 PE=1 SV=2	56	70.9	8.09
Q5JTH9	RRP12-like protein OS=Homo sapiens OX=9606 GN=RRP12 PE=1 SV=2	30	143.6	8.75
O15042	U2 snRNP-associated SURP motif-containing protein OS=Homo sapiens OX=9606 GN=U2SURP PE=1 SV=2	33	118.2	8.47
Q1RLN5	ARHGAP12 protein OS=Homo sapiens OX=9606 GN=ARHGAP12 PE=1 SV=1	42	90.8	8.51
Q8TAG9	Exocyst complex component 6 OS=Homo sapiens OX=9606 GN=EXOC6 PE=1 SV=3	44	93.7	6.2
E7EW49	CLIP-associating protein 2 OS=Homo sapiens OX=9606 GN=CLASP2 PE=1 SV=1	24	165.6	8.25
P31943	Heterogeneous nuclear ribonucleoprotein H OS=Homo sapiens OX=9606 GN=HNRNPH1 PE=1 SV=4	50	49.2	6.3
O15294	UDP-N-acetylglucosamine--peptide N-acetylglucosaminyltransferase 110 kDa subunit OS=Homo sapiens OX=9606 GN=OGT PE=1 SV=3	36	116.9	6.7
Q8TAT6	Nuclear protein localization protein 4 homolog OS=Homo sapiens OX=9606 GN=NPLOC4 PE=1 SV=3	51	68.1	6.38
A0A024R6H0	Cleavage and polyadenylation specificity factor subunit 2 OS=Homo sapiens OX=9606 GN=CPSF2 PE=3 SV=1	49	88.4	5.11
A0A024R566	Splicing factor 1 OS=Homo sapiens OX=9606 GN=SF1 PE=3 SV=1	35	61.9	9.28
Q05209	Tyrosine-protein phosphatase non-receptor type 12 OS=Homo sapiens OX=9606 GN=PTPN12 PE=1 SV=3	35	88.1	5.62
A0A024RDE8	PDZ and LIM domain 5, isoform CRA_c OS=Homo sapiens OX=9606 GN=PDLIM5 PE=4 SV=1	52	63.9	8.21
Q12959	Disks large homolog 1 OS=Homo sapiens OX=9606 GN=DLG1 PE=1 SV=2	44	100.4	5.76
Q9BZH6	WD repeat-containing protein 11 OS=Homo sapiens OX=9606 GN=WDR11 PE=1 SV=1	35	136.6	6.92
Q7Z2W4	Zinc finger CCCH-type antiviral protein 1 OS=Homo sapiens OX=9606 GN=ZC3HAV1 PE=1 SV=3	41	101.4	8.4
O15397	Importin-8 OS=Homo sapiens OX=9606 GN=IPO8 PE=1 SV=2	35	119.9	5.16
A0A590UJS9	Disks large homolog 1 OS=Homo sapiens OX=9606 GN=DLG1 PE=1 SV=1	48	93.5	5.92
Q63HL4	NADPH--cytochrome P450 reductase OS=Homo sapiens OX=9606 GN=DKFZp686G04235 PE=2 SV=1	56	77	5.58
X6RLX0	ELKS/Rab6-interacting/CAST family member 1 OS=Homo sapiens OX=9606 GN=ERC1 PE=1 SV=1	38	128.4	5.97
B4DVQ5	Eukaryotic translation initiation factor 3 subunit C OS=Homo sapiens OX=9606 GN=EIF3C PE=2 SV=1	35	103.6	5.53
Q6P996	Pyridoxal-dependent decarboxylase domain-containing protein 1 OS=Homo sapiens OX=9606 GN=PDXDC1 PE=1 SV=2	54	86.7	5.38
A0A0S2Z4Z0	RNA binding motif protein 14 isoform 1 (Fragment) OS=Homo sapiens OX=9606 GN=RBM14 PE=2 SV=1	43	69.4	9.67
Q92973	Transportin-1 OS=Homo sapiens OX=9606 GN=TNPO1 PE=1 SV=2	37	102.3	4.98
P42167	Lamina-associated polypeptide 2, isoforms beta/gamma OS=Homo sapiens OX=9606 GN=TMPO PE=1 SV=2	47	50.6	9.38
P85037	Forkhead box protein K1 OS=Homo sapiens OX=9606 GN=FOXK1 PE=1 SV=1	47	75.4	9.32
P26358	DNA (cytosine-5)-methyltransferase 1 OS=Homo sapiens OX=9606 GN=DNMT1 PE=1 SV=2	27	183.1	7.75
Q9BXB4	Oxysterol-binding protein-related protein 11 OS=Homo sapiens OX=9606 GN=OSBPL11 PE=1 SV=2	37	83.6	7.06
Q59GW5	Tripartite motif-containing 25 variant (Fragment) OS=Homo sapiens OX=9606 PE=2 SV=1	53	72.2	8.06
Q9Y263	Phospholipase A-2-activating protein OS=Homo sapiens OX=9606 GN=PLAA PE=1 SV=2	41	87.1	6.37
A7MD03	CCDC132 protein OS=Homo sapiens OX=9606 GN=CCDC132 PE=2 SV=1	41	110.3	6.07
P46199	Translation initiation factor IF-2, mitochondrial OS=Homo sapiens OX=9606 GN=MTIF2 PE=1 SV=2	33	81.3	7.15
A0A024R9R3	Vacuolar protein sorting-associated protein 18 homolog OS=Homo sapiens OX=9606 GN=VPS18 PE=3 SV=1	37	110.1	6.07
Q99959	Plakophilin-2 OS=Homo sapiens OX=9606 GN=PKP2 PE=1 SV=2	42	97.4	9.33
Q8NI27	THO complex subunit 2 OS=Homo sapiens OX=9606 GN=THOC2 PE=1 SV=2	25	182.7	8.44
Q5U0Q1	Ras-GTPase-activating protein SH3-domain-binding protein OS=Homo sapiens OX=9606 GN=G3BP PE=2 SV=1	53	52.1	5.52
Q13619	Cullin-4A OS=Homo sapiens OX=9606 GN=CUL4A PE=1 SV=3	48	87.6	8.13
A0A140T9E9	Bromodomain-containing protein 2 (Fragment) OS=Homo sapiens OX=9606 GN=BRD2 PE=1 SV=1	33	88.4	9.09
P26599	Polypyrimidine tract-binding protein 1 OS=Homo sapiens OX=9606 GN=PTBP1 PE=1 SV=1	57	57.2	9.17
A0A7P0TAU8	2'-5'-oligoadenylate synthase 3 OS=Homo sapiens OX=9606 GN=OAS3 PE=4 SV=1	34	125.9	8
Q96HY7	Probable 2-oxoglutarate dehydrogenase E1 component DHKTD1, mitochondrial OS=Homo sapiens OX=9606 GN=DHTKD1 PE=1 SV=2	39	103	6.93
A0A0C4DG89	RNA helicase OS=Homo sapiens OX=9606 GN=DDX46 PE=1 SV=1	28	117.4	9.29
Q15334	Lethal(2) giant larvae protein homolog 1 OS=Homo sapiens OX=9606 GN=LLGL1 PE=1 SV=3	27	115.3	6.29
Q9HAU4	E3 ubiquitin-protein ligase SMURF2 OS=Homo sapiens OX=9606 GN=SMURF2 PE=1 SV=1	46	86.1	7.96
A0A024RDY9	Rho guanine nucleotide exchange factor (GEF) 7, isoform CRA_b OS=Homo sapiens OX=9606 GN=ARHGEF7 PE=4 SV=1	47	73.1	7.21
A0A024R588	Splicing factor 1 OS=Homo sapiens OX=9606 GN=SF1 PE=3 SV=1	32	59.7	9.5
O95479	GDH/6PGL endoplasmic bifunctional protein OS=Homo sapiens OX=9606 GN=H6PD PE=1 SV=2	47	88.8	7.3
Q08426	Peroxisomal bifunctional enzyme OS=Homo sapiens OX=9606 GN=EHHADH PE=1 SV=3	50	79.4	9.14
Q9UJC3	Protein Hook homolog 1 OS=Homo sapiens OX=9606 GN=HOOK1 PE=1 SV=2	43	84.6	5.15
H0YAR2	Polyadenylate-binding protein OS=Homo sapiens OX=9606 GN=PABPC1 PE=1 SV=2	39	66.6	9.28
O75044	SLIT-ROBO Rho GTPase-activating protein 2 OS=Homo sapiens OX=9606 GN=SRGAP2 PE=1 SV=3	31	120.8	6.7
Q96CW5	Gamma-tubulin complex component 3 OS=Homo sapiens OX=9606 GN=TUBGCP3 PE=1 SV=2	36	103.5	8.12
P29317	Ephrin type-A receptor 2 OS=Homo sapiens OX=9606 GN=EPHA2 PE=1 SV=2	37	108.2	6.23
M0QXD6	Transcription initiation factor IIF subunit alpha (Fragment) OS=Homo sapiens OX=9606 GN=GTF2F1 PE=1 SV=1	39	48.6	7.44
Q8N1B4	Vacuolar protein sorting-associated protein 52 homolog OS=Homo sapiens OX=9606 GN=VPS52 PE=1 SV=1	48	82.2	5.99
Q14247	Src substrate cortactin OS=Homo sapiens OX=9606 GN=CTTN PE=1 SV=2	50	61.5	5.4
A1A5C4	RRBP1 protein OS=Homo sapiens OX=9606 GN=RRBP1 PE=2 SV=1	30	102.8	5.38
A0A1S5UZH8	SLIT-ROBO Rho GTPase-activating protein 2 OS=Homo sapiens OX=9606 GN=SRGAP2 PE=2 SV=1	33	110.6	6.84
A0A0S2Z5P5	Mini-chromosome maintenance complex-binding protein (Fragment) OS=Homo sapiens OX=9606 GN=MCMBP PE=2 SV=1	57	72.7	5.78
Q9BTE3	Mini-chromosome maintenance complex-binding protein OS=Homo sapiens OX=9606 GN=MCMBP PE=1 SV=2	57	72.9	5.87
A0A669KAX4	Cullin-4B OS=Homo sapiens OX=9606 GN=CUL4B PE=1 SV=1	40	102.5	8.06
Q9Y2U8	Inner nuclear membrane protein Man1 OS=Homo sapiens OX=9606 GN=LEMD3 PE=1 SV=2	35	99.9	7.55
O60763	General vesicular transport factor p115 OS=Homo sapiens OX=9606 GN=USO1 PE=1 SV=2	39	107.8	4.91
Q9H6R4	Nucleolar protein 6 OS=Homo sapiens OX=9606 GN=NOL6 PE=1 SV=2	29	127.5	7.64
P16885	1-phosphatidylinositol 4,5-bisphosphate phosphodiesterase gamma-2 OS=Homo sapiens OX=9606 GN=PLCG2 PE=1 SV=4	29	147.8	6.64
Q92620	Pre-mRNA-splicing factor ATP-dependent RNA helicase PRP16 OS=Homo sapiens OX=9606 GN=DHX38 PE=1 SV=2	30	140.4	6.54
P05783	Keratin, type I cytoskeletal 18 OS=Homo sapiens OX=9606 GN=KRT18 PE=1 SV=2	61	48	5.45
P19338	Nucleolin OS=Homo sapiens OX=9606 GN=NCL PE=1 SV=3	30	76.6	4.7
A0A024R872	Chromosome 9 open reading frame 88, isoform CRA_a OS=Homo sapiens OX=9606 GN=C9orf88 PE=3 SV=1	37	82.6	6.15
B2R8Y4	cDNA, FLJ94117, highly similar to Homo sapiens actinin, alpha 3 (ACTN3), mRNA OS=Homo sapiens OX=9606 PE=1 SV=1	15	103.2	5.6
A0A024R7F7	Transportin 2 (Importin 3, karyopherin beta 2b), isoform CRA_b OS=Homo sapiens OX=9606 GN=TNPO2 PE=4 SV=1	37	100.3	4.98
B2RB32	Alpha-1,4 glucan phosphorylase OS=Homo sapiens OX=9606 PE=2 SV=1	22	97	7.03
B5BUE6	DEAD box protein 5 (Fragment) OS=Homo sapiens OX=9606 GN=DDX5 PE=2 SV=1	51	69.1	8.92
P18074	General transcription and DNA repair factor IIH helicase subunit XPD OS=Homo sapiens OX=9606 GN=ERCC2 PE=1 SV=1	43	86.9	7.15
P00367	Glutamate dehydrogenase 1, mitochondrial OS=Homo sapiens OX=9606 GN=GLUD1 PE=1 SV=2	51	61.4	7.8
E9PLK3	Aminopeptidase OS=Homo sapiens OX=9606 GN=NPEPPS PE=1 SV=1	38	102.9	5.6
Q96KP1	Exocyst complex component 2 OS=Homo sapiens OX=9606 GN=EXOC2 PE=1 SV=1	42	104	6.9
Q13618	Cullin-3 OS=Homo sapiens OX=9606 GN=CUL3 PE=1 SV=2	39	88.9	8.48
E9PPJ0	Splicing factor 3B subunit 2 OS=Homo sapiens OX=9606 GN=SF3B2 PE=1 SV=1	34	98.1	5.62
P23368	NAD-dependent malic enzyme, mitochondrial OS=Homo sapiens OX=9606 GN=ME2 PE=1 SV=1	54	65.4	7.61
A0A7I2YQN2	Heterogeneous nuclear ribonucleoprotein Q OS=Homo sapiens OX=9606 GN=SYNCRIP PE=1 SV=1	46	62.5	7.56
Q0MQR4	Poly(ADP-ribose) glycohydrolase OS=Homo sapiens OX=9606 GN=PARG PE=1 SV=1	36	110.9	6.55
P49756	RNA-binding protein 25 OS=Homo sapiens OX=9606 GN=RBM25 PE=1 SV=3	31	100.1	6.32
P21127	Cyclin-dependent kinase 11B OS=Homo sapiens OX=9606 GN=CDK11B PE=1 SV=4	41	92.6	5.54
Q9Y2X7	ARF GTPase-activating protein GIT1 OS=Homo sapiens OX=9606 GN=GIT1 PE=1 SV=2	49	84.3	6.8
Q9P2E9	Ribosome-binding protein 1 OS=Homo sapiens OX=9606 GN=RRBP1 PE=1 SV=5	22	152.4	8.6
B4DZJ6	cDNA FLJ54706, highly similar to Ubiquitin-associated protein 2-like OS=Homo sapiens OX=9606 PE=2 SV=1	35	93.9	8.32
Q9P2R3	Rabankyrin-5 OS=Homo sapiens OX=9606 GN=ANKFY1 PE=1 SV=2	34	128.3	6.1
A0A384N6C7	Epididymis secretory sperm binding protein OS=Homo sapiens OX=9606 PE=2 SV=1	52	64	8.27
Q08AM6	Protein VAC14 homolog OS=Homo sapiens OX=9606 GN=VAC14 PE=1 SV=1	39	87.9	6.13
A0A6Q8PEX6	Elongator complex protein 1 OS=Homo sapiens OX=9606 GN=ELP1 PE=1 SV=1	31	146.4	5.82
O95671	Probable bifunctional dTTP/UTP pyrophosphatase/methyltransferase protein OS=Homo sapiens OX=9606 GN=ASMTL PE=1 SV=3	48	68.8	6.07
P04843	Dolichyl-diphosphooligosaccharide--protein glycosyltransferase subunit 1 OS=Homo sapiens OX=9606 GN=RPN1 PE=1 SV=1	51	68.5	6.38
Q8NER5	Activin receptor type-1C OS=Homo sapiens OX=9606 GN=ACVR1C PE=1 SV=1	47	54.8	7.88
Q03252	Lamin-B2 OS=Homo sapiens OX=9606 GN=LMNB2 PE=1 SV=4	47	69.9	5.59
A0A0S2Z4R1	Tyrosine--tRNA ligase (Fragment) OS=Homo sapiens OX=9606 GN=YARS PE=2 SV=1	54	59.1	7.05
Q14126	Desmoglein-2 OS=Homo sapiens OX=9606 GN=DSG2 PE=1 SV=2	38	122.2	5.24
O60488	Long-chain-fatty-acid--CoA ligase 4 OS=Homo sapiens OX=9606 GN=ACSL4 PE=1 SV=2	45	79.1	8.38
Q9NZQ3	NCK-interacting protein with SH3 domain OS=Homo sapiens OX=9606 GN=NCKIPSD PE=1 SV=1	32	78.9	6.38
A6NHR9	Structural maintenance of chromosomes flexible hinge domain-containing protein 1 OS=Homo sapiens OX=9606 GN=SMCHD1 PE=1 SV=2	23	226.2	7.3
A0A7P0T9U7	Splicing factor 1 OS=Homo sapiens OX=9606 GN=SF1 PE=4 SV=1	21	80.3	9.2
Q9NSD9	Phenylalanine--tRNA ligase beta subunit OS=Homo sapiens OX=9606 GN=FARSB PE=1 SV=3	48	66.1	6.84
A0A384ME17	Elongation factor Tu OS=Homo sapiens OX=9606 GN=TUFM PE=2 SV=1	55	49.8	7.61
B3KXW5	AP-1 complex subunit gamma OS=Homo sapiens OX=9606 PE=2 SV=1	39	94.1	7.05
Q13308	Inactive tyrosine-protein kinase 7 OS=Homo sapiens OX=9606 GN=PTK7 PE=1 SV=2	30	118.3	7.09
Q9BZE4	GTP-binding protein 4 OS=Homo sapiens OX=9606 GN=GTPBP4 PE=1 SV=3	45	73.9	9.5
O43390	Heterogeneous nuclear ribonucleoprotein R OS=Homo sapiens OX=9606 GN=HNRNPR PE=1 SV=1	39	70.9	8.13
B7Z2C6	cDNA FLJ54515, highly similar to Rho-GTPase-activating protein 4 OS=Homo sapiens OX=9606 PE=2 SV=1	31	102.2	6.25
Q8N3C0	Activating signal cointegrator 1 complex subunit 3 OS=Homo sapiens OX=9606 GN=ASCC3 PE=1 SV=3	16	251.3	7.09
Q5SRE5	Nucleoporin NUP188 OS=Homo sapiens OX=9606 GN=NUP188 PE=1 SV=1	24	195.9	6.73
A0A384N6C2	Inosine-5'-monophosphate dehydrogenase OS=Homo sapiens OX=9606 GN=IMPDH PE=2 SV=1	53	55.8	6.9
Q13546	Receptor-interacting serine/threonine-protein kinase 1 OS=Homo sapiens OX=9606 GN=RIPK1 PE=1 SV=3	37	75.9	6.33
Q96FS4	Signal-induced proliferation-associated protein 1 OS=Homo sapiens OX=9606 GN=SIPA1 PE=1 SV=1	35	112.1	6.6
E3W994	CLIP-associating protein 2 OS=Homo sapiens OX=9606 GN=CLASP2 PE=1 SV=2	27	138.8	8.34
Q13045	Protein flightless-1 homolog OS=Homo sapiens OX=9606 GN=FLII PE=1 SV=2	29	144.7	6.05
Q9HC35	Echinoderm microtubule-associated protein-like 4 OS=Homo sapiens OX=9606 GN=EML4 PE=1 SV=3	37	108.8	6.4
A0A7P0TB24	Sphingomyelin phosphodiesterase 4 OS=Homo sapiens OX=9606 GN=SMPD4 PE=4 SV=1	40	93.3	7.97
A0A0S2Z5H3	Clathrin interactor 1 isoform 2 (Fragment) OS=Homo sapiens OX=9606 GN=CLINT1 PE=2 SV=1	29	70.3	6.58
A8MYT4	Phosphatidylinositol 3-kinase catalytic subunit type 3 OS=Homo sapiens OX=9606 GN=PIK3C3 PE=1 SV=2	36	94.3	6.64
O43150	Arf-GAP with SH3 domain, ANK repeat and PH domain-containing protein 2 OS=Homo sapiens OX=9606 GN=ASAP2 PE=1 SV=3	32	111.6	6.68
O76021	Ribosomal L1 domain-containing protein 1 OS=Homo sapiens OX=9606 GN=RSL1D1 PE=1 SV=3	32	54.9	10.13
A0A384MTI6	Vesicle-fusing ATPase OS=Homo sapiens OX=9606 PE=2 SV=1	41	82.5	6.95
O00411	DNA-directed RNA polymerase, mitochondrial OS=Homo sapiens OX=9606 GN=POLRMT PE=1 SV=2	28	138.5	8.98
Q8N766	ER membrane protein complex subunit 1 OS=Homo sapiens OX=9606 GN=EMC1 PE=1 SV=1	30	111.7	7.66
Q9BYX2	TBC1 domain family member 2A OS=Homo sapiens OX=9606 GN=TBC1D2 PE=1 SV=3	36	105.3	6.58
Q9BUF5	Tubulin beta-6 chain OS=Homo sapiens OX=9606 GN=TUBB6 PE=1 SV=1	58	49.8	4.88
Q9UQ88	Cyclin-dependent kinase 11A OS=Homo sapiens OX=9606 GN=CDK11A PE=1 SV=4	36	91.3	5.36
A8KA05	Protein argonaute-3 OS=Homo sapiens OX=9606 GN=EIF2C3 PE=2 SV=1	36	97.3	9.11
V9GYM8	Guanine nucleotide exchange factor H1 OS=Homo sapiens OX=9606 GN=ARHGEF2 PE=1 SV=1	31	116	7.37
B4DH07	Pitrilysin metalloproteinase 1 OS=Homo sapiens OX=9606 PE=2 SV=1	32	116.2	6.67
Q75QN2	Integrator complex subunit 8 OS=Homo sapiens OX=9606 GN=INTS8 PE=1 SV=1	32	113	7.05
B2R959	cDNA, FLJ94229, highly similar to Homo sapiens heterogeneous nuclear ribonucleoprotein L (HNRPL),mRNA OS=Homo sapiens OX=9606 PE=2 SV=1	55	60.2	7.11
Q68EM7	Rho GTPase-activating protein 17 OS=Homo sapiens OX=9606 GN=ARHGAP17 PE=1 SV=1	33	95.4	7.62
Q14690	Protein RRP5 homolog OS=Homo sapiens OX=9606 GN=PDCD11 PE=1 SV=3	26	208.6	8.87
A0A5H1ZRQ2	RNA helicase OS=Homo sapiens OX=9606 GN=DDX17 PE=1 SV=2	39	80.4	8.37
A0A7I2V5Y5	Kinesin-like protein OS=Homo sapiens OX=9606 GN=KIF23 PE=1 SV=1	32	111.6	8.5
Q8WWM7	Ataxin-2-like protein OS=Homo sapiens OX=9606 GN=ATXN2L PE=1 SV=2	25	113.3	8.59
Q6P1N1	PPM2C protein (Fragment) OS=Homo sapiens OX=9606 GN=PPM2C PE=2 SV=1	54	68.4	7.9
Q9UBV2	Protein sel-1 homolog 1 OS=Homo sapiens OX=9606 GN=SEL1L PE=1 SV=3	35	88.7	5.39
A0A7P0T9L0	Calnexin OS=Homo sapiens OX=9606 GN=CANX PE=4 SV=1	42	62.5	4.58
Q9UK59	Lariat debranching enzyme OS=Homo sapiens OX=9606 GN=DBR1 PE=1 SV=2	39	61.5	5.47
O00459	Phosphatidylinositol 3-kinase regulatory subunit beta OS=Homo sapiens OX=9606 GN=PIK3R2 PE=1 SV=2	44	81.5	6.43
O75676	Ribosomal protein S6 kinase alpha-4 OS=Homo sapiens OX=9606 GN=RPS6KA4 PE=1 SV=1	41	85.6	8.28
D9YZV0	HBS1-like protein OS=Homo sapiens OX=9606 GN=HBS1L PE=1 SV=1	44	75.4	6.61
A7E2F7	CAP-GLY domain containing linker protein 2 OS=Homo sapiens OX=9606 GN=CLIP2 PE=2 SV=1	29	111.7	6.76
Q96T88	E3 ubiquitin-protein ligase UHRF1 OS=Homo sapiens OX=9606 GN=UHRF1 PE=1 SV=1	38	89.8	7.56
B4E2A6	cDNA FLJ55508, highly similar to Sad1/unc-84-like protein 2 OS=Homo sapiens OX=9606 PE=2 SV=1	40	83.9	6.84
Q15046	Lysine--tRNA ligase OS=Homo sapiens OX=9606 GN=KARS1 PE=1 SV=3	42	68	6.35
B7Z481	cDNA FLJ54018, highly similar to PDZ and LIM domain protein 5 OS=Homo sapiens OX=9606 PE=2 SV=1	54	51.2	7.78
Q9H4E7	Differentially expressed in FDCP 6 homolog OS=Homo sapiens OX=9606 GN=DEF6 PE=1 SV=1	34	73.9	6.05
Q06124	Tyrosine-protein phosphatase non-receptor type 11 OS=Homo sapiens OX=9606 GN=PTPN11 PE=1 SV=3	50	68	7.3
A0A2R8Y5S7	Radixin OS=Homo sapiens OX=9606 GN=RDX PE=1 SV=1	35	69.3	6.27
Q9HCS7	Pre-mRNA-splicing factor SYF1 OS=Homo sapiens OX=9606 GN=XAB2 PE=1 SV=2	36	99.9	6.23
Q12851	Mitogen-activated protein kinase kinase kinase kinase 2 OS=Homo sapiens OX=9606 GN=MAP4K2 PE=1 SV=2	39	91.5	6.34
P50454	Serpin H1 OS=Homo sapiens OX=9606 GN=SERPINH1 PE=1 SV=2	49	46.4	8.69
Q8NB90	ATPase family protein 2 homolog OS=Homo sapiens OX=9606 GN=SPATA5 PE=1 SV=3	43	97.8	5.66
O95786	Antiviral innate immune response receptor RIG-I OS=Homo sapiens OX=9606 GN=DDX58 PE=1 SV=2	30	106.5	6.4
A0A494C128	Nucleolar protein 56 OS=Homo sapiens OX=9606 GN=NOP56 PE=1 SV=1	56	53	8.48
Q5T4S7	E3 ubiquitin-protein ligase UBR4 OS=Homo sapiens OX=9606 GN=UBR4 PE=1 SV=1	7	573.5	6.04
Q53FX3	Vacuolar protein sorting 11 (Yeast homolog) variant (Fragment) OS=Homo sapiens OX=9606 PE=2 SV=1	38	107.7	6.95
O14715	RANBP2-like and GRIP domain-containing protein 8 OS=Homo sapiens OX=9606 GN=RGPD8 PE=1 SV=2	14	198.9	6.49
A0A0S2Z3L2	P-type Ca(2+) transporter (Fragment) OS=Homo sapiens OX=9606 GN=ATP2A2 PE=2 SV=1	36	114.7	5.34
P19838	Nuclear factor NF-kappa-B p105 subunit OS=Homo sapiens OX=9606 GN=NFKB1 PE=1 SV=2	33	105.3	5.4
O43776	Asparagine--tRNA ligase, cytoplasmic OS=Homo sapiens OX=9606 GN=NARS1 PE=1 SV=1	44	62.9	6.25
Q96F88	Processing of 1, ribonuclease P/MRP subunit (S. cerevisiae) OS=Homo sapiens OX=9606 GN=POP1 PE=2 SV=1	29	114.6	9.2
Q9NVM9	Integrator complex subunit 13 OS=Homo sapiens OX=9606 GN=INTS13 PE=1 SV=2	45	80.2	6.7
A0A6Q8PHH9	Diadenosine tetraphosphate synthetase OS=Homo sapiens OX=9606 GN=GARS1 PE=1 SV=1	40	79.3	6.7
A0A024RA36	KIAA0241, isoform CRA_b OS=Homo sapiens OX=9606 GN=KIAA0241 PE=4 SV=1	41	71.9	6.21
Q9H6S0	3'-5' RNA helicase YTHDC2 OS=Homo sapiens OX=9606 GN=YTHDC2 PE=1 SV=2	25	160.1	8.4
A0A7I2V492	Kinesin-like protein OS=Homo sapiens OX=9606 GN=KIF5C PE=1 SV=1	31	109.3	6.14
Q9H8H0	Nucleolar protein 11 OS=Homo sapiens OX=9606 GN=NOL11 PE=1 SV=1	53	81.1	6.07
Q9ULH1	Arf-GAP with SH3 domain, ANK repeat and PH domain-containing protein 1 OS=Homo sapiens OX=9606 GN=ASAP1 PE=1 SV=4	29	125.4	7.31
A0A024RAC5	Epididymis secretory sperm binding protein OS=Homo sapiens OX=9606 GN=RCC2 PE=2 SV=1	50	56	8.78
P28370	Probable global transcription activator SNF2L1 OS=Homo sapiens OX=9606 GN=SMARCA1 PE=1 SV=2	25	122.5	8.09
Q6XZF7	Dynamin-binding protein OS=Homo sapiens OX=9606 GN=DNMBP PE=1 SV=1	24	177.2	5.39
A0A024R4A5	Trinucleotide repeat containing 15, isoform CRA_a OS=Homo sapiens OX=9606 GN=TNRC15 PE=4 SV=1	22	149.9	5.54
Q27J81	Inverted formin-2 OS=Homo sapiens OX=9606 GN=INF2 PE=1 SV=2	22	135.5	5.38
Q01433	AMP deaminase 2 OS=Homo sapiens OX=9606 GN=AMPD2 PE=1 SV=2	31	100.6	6.93
A0A3S6H812	Protein arginine N-methyltransferase 1 transcript variant 22 OS=Homo sapiens OX=9606 GN=PRMT1 PE=2 SV=1	55	43.8	5.99
H0YFD6	Enoyl-CoA hydratase OS=Homo sapiens OX=9606 GN=HADHA PE=1 SV=2	41	86.3	9.1
Q8TB72	Pumilio homolog 2 OS=Homo sapiens OX=9606 GN=PUM2 PE=1 SV=2	23	114.1	7.08
Q8N523	Tuftelin-interacting protein 11 OS=Homo sapiens OX=9606 GN=TFIP11 PE=2 SV=1	38	96.7	5.67
Q9Y2X3	Nucleolar protein 58 OS=Homo sapiens OX=9606 GN=NOP58 PE=1 SV=1	42	59.5	8.92
B4DS79	cDNA FLJ56828, highly similar to Adapter-relatedprotein complex 1 beta-1 subunit OS=Homo sapiens OX=9606 PE=2 SV=1	41	53.8	4.69
Q96GQ7	Probable ATP-dependent RNA helicase DDX27 OS=Homo sapiens OX=9606 GN=DDX27 PE=1 SV=2	33	89.8	9.28
B4DRW8	Pitrilysin metalloproteinase 1 OS=Homo sapiens OX=9606 PE=2 SV=1	33	109.7	7.28
Q6NXG1	Epithelial splicing regulatory protein 1 OS=Homo sapiens OX=9606 GN=ESRP1 PE=1 SV=2	49	75.5	6.68
P26368	Splicing factor U2AF 65 kDa subunit OS=Homo sapiens OX=9606 GN=U2AF2 PE=1 SV=4	45	53.5	9.09
P26038	Moesin OS=Homo sapiens OX=9606 GN=MSN PE=1 SV=3	30	67.8	6.4
Q13751	Laminin subunit beta-3 OS=Homo sapiens OX=9606 GN=LAMB3 PE=1 SV=1	23	129.5	7.21
O75330	Hyaluronan mediated motility receptor OS=Homo sapiens OX=9606 GN=HMMR PE=1 SV=2	34	84	5.83
Q7KZ85	Transcription elongation factor SPT6 OS=Homo sapiens OX=9606 GN=SUPT6H PE=1 SV=2	18	198.9	4.91
B7ZKT9	KIAA1033 protein OS=Homo sapiens OX=9606 GN=KIAA1033 PE=2 SV=1	27	136.4	7.44
A0A7I2V409	Non-specific serine/threonine protein kinase OS=Homo sapiens OX=9606 GN=MARK3 PE=1 SV=1	38	88.8	9.42
Q15345	Leucine-rich repeat-containing protein 41 OS=Homo sapiens OX=9606 GN=LRRC41 PE=1 SV=3	27	88.6	8.38
B4DU42	cDNA FLJ56153, highly similar to Homo sapiens transforming growth factor beta regulator 4 (TBRG4), transcript variant 1, mRNA OS=Homo sapiens OX=9606 PE=2 SV=1	43	71.8	7.3
Q9H4Z3	mRNA (2'-O-methyladenosine-N(6)-)-methyltransferase OS=Homo sapiens OX=9606 GN=PCIF1 PE=1 SV=1	37	80.6	7.42
P04844	Dolichyl-diphosphooligosaccharide--protein glycosyltransferase subunit 2 OS=Homo sapiens OX=9606 GN=RPN2 PE=1 SV=3	41	69.2	5.69
O94874	E3 UFM1-protein ligase 1 OS=Homo sapiens OX=9606 GN=UFL1 PE=1 SV=2	29	89.5	6.79
Q8IVT2	Mitotic interactor and substrate of PLK1 OS=Homo sapiens OX=9606 GN=MISP PE=1 SV=1	44	75.3	6.83
O95202	Mitochondrial proton/calcium exchanger protein OS=Homo sapiens OX=9606 GN=LETM1 PE=1 SV=1	38	83.3	6.7
Q92804	TATA-binding protein-associated factor 2N OS=Homo sapiens OX=9606 GN=TAF15 PE=1 SV=1	23	61.8	8.02
A0A024QZ70	TAO kinase 1, isoform CRA_a OS=Homo sapiens OX=9606 GN=TAOK1 PE=4 SV=1	24	116	7.65
Q6PJG6	BRCA1-associated ATM activator 1 OS=Homo sapiens OX=9606 GN=BRAT1 PE=1 SV=2	38	88.1	5.27
Q643R0	HCTP4 OS=Homo sapiens OX=9606 GN=HCTP4 PE=2 SV=1	33	85.6	9.23
Q13144	Translation initiation factor eIF-2B subunit epsilon OS=Homo sapiens OX=9606 GN=EIF2B5 PE=1 SV=3	42	80.3	5.08
A0A0A0MTH9	TATA-binding protein-associated factor 172 OS=Homo sapiens OX=9606 GN=BTAF1 PE=1 SV=1	20	206.8	6.52
P49754	Vacuolar protein sorting-associated protein 41 homolog OS=Homo sapiens OX=9606 GN=VPS41 PE=1 SV=3	32	98.5	5.85
A0A499FJY3	RNA-binding protein 15 OS=Homo sapiens OX=9606 GN=RBM15 PE=1 SV=1	38	101.3	9.96
P08779	Keratin, type I cytoskeletal 16 OS=Homo sapiens OX=9606 GN=KRT16 PE=1 SV=4	53	51.2	5.05
A0A140VKE7	Testis tissue sperm-binding protein Li 64n OS=Homo sapiens OX=9606 PE=2 SV=1	29	94.5	5.88
Q5TEJ8	Protein THEMIS2 OS=Homo sapiens OX=9606 GN=THEMIS2 PE=1 SV=1	42	72	6.1
Q9Y5A7	NEDD8 ultimate buster 1 OS=Homo sapiens OX=9606 GN=NUB1 PE=1 SV=2	32	70.5	5.96
A0A0S2Z4X9	Glutamine--fructose-6-phosphate transaminase (isomerizing) (Fragment) OS=Homo sapiens OX=9606 GN=GFPT2 PE=2 SV=1	26	76.9	7.37
P13647	Keratin, type II cytoskeletal 5 OS=Homo sapiens OX=9606 GN=KRT5 PE=1 SV=3	40	62.3	7.74
B4DTX4	cDNA FLJ59756, highly similar to Ras GTPase-activating protein 1 OS=Homo sapiens OX=9606 PE=2 SV=1	35	101.7	7.77
B7ZL34	PUM2 protein OS=Homo sapiens OX=9606 GN=PUM2 PE=2 SV=1	24	105.9	6.86
E7ESY4	Metastasis-associated protein MTA1 OS=Homo sapiens OX=9606 GN=MTA1 PE=1 SV=1	42	79.3	9.11
P14868	Aspartate--tRNA ligase, cytoplasmic OS=Homo sapiens OX=9606 GN=DARS1 PE=1 SV=2	47	57.1	6.55
Q96S55	ATPase WRNIP1 OS=Homo sapiens OX=9606 GN=WRNIP1 PE=1 SV=2	38	72.1	6.1
A0A024R1C2	DNA topoisomerase OS=Homo sapiens OX=9606 GN=TOP3B PE=3 SV=1	39	96.6	8.12
Q9H3S7	Tyrosine-protein phosphatase non-receptor type 23 OS=Homo sapiens OX=9606 GN=PTPN23 PE=1 SV=1	16	178.9	6.92
Q07666	KH domain-containing, RNA-binding, signal transduction-associated protein 1 OS=Homo sapiens OX=9606 GN=KHDRBS1 PE=1 SV=1	28	48.2	8.66
Q7Z5L9	Interferon regulatory factor 2-binding protein 2 OS=Homo sapiens OX=9606 GN=IRF2BP2 PE=1 SV=2	43	61	8.69
Q9UHB9	Signal recognition particle subunit SRP68 OS=Homo sapiens OX=9606 GN=SRP68 PE=1 SV=2	43	70.7	8.56
Q86UE8	Serine/threonine-protein kinase tousled-like 2 OS=Homo sapiens OX=9606 GN=TLK2 PE=1 SV=2	30	87.6	8.41
Q2NL82	Pre-rRNA-processing protein TSR1 homolog OS=Homo sapiens OX=9606 GN=TSR1 PE=1 SV=1	31	91.8	7.42
P26641	Elongation factor 1-gamma OS=Homo sapiens OX=9606 GN=EEF1G PE=1 SV=3	48	50.1	6.67
Q6L8Q7	2',5'-phosphodiesterase 12 OS=Homo sapiens OX=9606 GN=PDE12 PE=1 SV=2	44	67.3	6.57
A0A024R8A7	HCG31253, isoform CRA_a OS=Homo sapiens OX=9606 GN=hCG_31253 PE=4 SV=1	48	61.6	8.38
Q9BQG0	Myb-binding protein 1A OS=Homo sapiens OX=9606 GN=MYBBP1A PE=1 SV=2	23	148.8	9.28
Q9H4L5	Oxysterol-binding protein-related protein 3 OS=Homo sapiens OX=9606 GN=OSBPL3 PE=1 SV=1	35	101.2	6.87
A0A146IHP0	SUN domain-containing protein 1 OS=Homo sapiens OX=9606 GN=SUN1 PE=2 SV=1	26	98.7	7.39
Q5W0V3	FHF complex subunit HOOK interacting protein 2A OS=Homo sapiens OX=9606 GN=FHIP2A PE=1 SV=1	39	86.5	5.29
P21980	Protein-glutamine gamma-glutamyltransferase 2 OS=Homo sapiens OX=9606 GN=TGM2 PE=1 SV=2	33	77.3	5.22
H7BXH2	Serine/threonine-protein phosphatase 6 regulatory subunit 3 OS=Homo sapiens OX=9606 GN=PPP6R3 PE=1 SV=1	32	92.4	4.63
Q9BVJ6	U3 small nucleolar RNA-associated protein 14 homolog A OS=Homo sapiens OX=9606 GN=UTP14A PE=1 SV=1	41	87.9	7.87
A0A024R0Z3	RNA helicase OS=Homo sapiens OX=9606 GN=DDX23 PE=4 SV=1	37	95.5	9.55
Q9UBC2	Epidermal growth factor receptor substrate 15-like 1 OS=Homo sapiens OX=9606 GN=EPS15L1 PE=1 SV=1	43	94.2	5.11
A0A1U9X7R2	GNL1 OS=Homo sapiens OX=9606 PE=4 SV=1	38	68.6	5.95
Q8NEL9	Phospholipase DDHD1 OS=Homo sapiens OX=9606 GN=DDHD1 PE=1 SV=2	28	100.4	5.67
Q02218	2-oxoglutarate dehydrogenase, mitochondrial OS=Homo sapiens OX=9606 GN=OGDH PE=1 SV=3	31	115.9	6.86
Q9Y3Z3	Deoxynucleoside triphosphate triphosphohydrolase SAMHD1 OS=Homo sapiens OX=9606 GN=SAMHD1 PE=1 SV=2	51	72.2	7.14
P26196	Probable ATP-dependent RNA helicase DDX6 OS=Homo sapiens OX=9606 GN=DDX6 PE=1 SV=2	58	54.4	8.66
B7Z2R3	cDNA FLJ59510, highly similar to Homo sapiens tight junction protein 2 (TJP2), transcript variant 2, mRNA OS=Homo sapiens OX=9606 PE=2 SV=1	33	115.1	6.71
A0A140VJQ7	Testicular tissue protein Li 133 OS=Homo sapiens OX=9606 PE=2 SV=1	31	87.6	5.86
P17655	Calpain-2 catalytic subunit OS=Homo sapiens OX=9606 GN=CAPN2 PE=1 SV=6	42	79.9	4.98
A0A0S2Z428	HCG2039812, isoform CRA_b (Fragment) OS=Homo sapiens OX=9606 GN=KRT6A PE=2 SV=1	41	60	8
B4DEB0	cDNA FLJ56054, highly similar to 26S proteasome non-ATPase regulatory subunit 3 OS=Homo sapiens OX=9606 PE=2 SV=1	44	58.5	7.68
A0A024RCR6	BCL2-associated athanogene 6 OS=Homo sapiens OX=9606 GN=BAG6 PE=1 SV=1	24	118.6	5.6
Q9BSC4	Nucleolar protein 10 OS=Homo sapiens OX=9606 GN=NOL10 PE=1 SV=1	42	80.3	8.46
A0A024RA49	Anillin, actin binding protein (Scraps homolog, Drosophila), isoform CRA_e OS=Homo sapiens OX=9606 GN=ANLN PE=4 SV=1	26	124.1	8.07
Q9NTI5	Sister chromatid cohesion protein PDS5 homolog B OS=Homo sapiens OX=9606 GN=PDS5B PE=1 SV=1	24	164.6	8.47
Q9BQ70	Transcription factor 25 OS=Homo sapiens OX=9606 GN=TCF25 PE=1 SV=1	39	76.6	6.35
Q14444	Caprin-1 OS=Homo sapiens OX=9606 GN=CAPRIN1 PE=1 SV=2	36	78.3	5.25
Q96Q05	Trafficking protein particle complex subunit 9 OS=Homo sapiens OX=9606 GN=TRAPPC9 PE=1 SV=2	30	128.4	6.62
P24928	DNA-directed RNA polymerase II subunit RPB1 OS=Homo sapiens OX=9606 GN=POLR2A PE=1 SV=2	18	217	7.37
A2A274	Aconitate hydratase, mitochondrial OS=Homo sapiens OX=9606 GN=ACO2 PE=1 SV=1	35	87.8	7.37
A0A024R1U0	Ran GTPase activating protein 1, isoform CRA_d OS=Homo sapiens OX=9606 GN=RANGAP1 PE=4 SV=1	43	63.5	4.68
Q4AEJ3	Mitochondrial transmembrane GTPase Fzo-1 OS=Homo sapiens OX=9606 GN=hfzo1 PE=2 SV=1	41	84.1	6.37
B7WP74	Pre-mRNA-splicing factor CWC22 homolog (Fragment) OS=Homo sapiens OX=9606 GN=CWC22 PE=1 SV=1	32	85.5	5.71
Q9NU22	Midasin OS=Homo sapiens OX=9606 GN=MDN1 PE=1 SV=2	6	632.4	5.68
B4DDF7	cDNA FLJ53296, highly similar to Serine/threonine-protein phosphatase 2A 65 kDa regulatory subunit A alpha isoform OS=Homo sapiens OX=9606 PE=2 SV=1	34	64.1	5.14
Q9UL03	Integrator complex subunit 6 OS=Homo sapiens OX=9606 GN=INTS6 PE=1 SV=1	36	100.3	8.62
P35580	Myosin-10 OS=Homo sapiens OX=9606 GN=MYH10 PE=1 SV=3	15	228.9	5.54
B5MCF9	Pescadillo homolog OS=Homo sapiens OX=9606 GN=PES1 PE=1 SV=1	40	66	7.5
P41214	Eukaryotic translation initiation factor 2D OS=Homo sapiens OX=9606 GN=EIF2D PE=1 SV=3	60	64.7	7.65
P04040	Catalase OS=Homo sapiens OX=9606 GN=CAT PE=1 SV=3	42	59.7	7.39
A0A024R0H6	RNA polymerase II-associated factor 1 homolog OS=Homo sapiens OX=9606 GN=PAF1 PE=3 SV=1	40	59.9	4.63
Q7Z2Z2	Elongation factor-like GTPase 1 OS=Homo sapiens OX=9606 GN=EFL1 PE=1 SV=2	26	125.4	5.91
Q5T447	E3 ubiquitin-protein ligase HECTD3 OS=Homo sapiens OX=9606 GN=HECTD3 PE=1 SV=1	32	97.1	5.64
P52701	DNA mismatch repair protein Msh6 OS=Homo sapiens OX=9606 GN=MSH6 PE=1 SV=2	23	152.7	6.9
A0A7P0TAQ9	DnaJ homolog subfamily C member 10 OS=Homo sapiens OX=9606 GN=DNAJC10 PE=4 SV=1	39	87.9	7.09
G3V3H3	Kinesin light chain OS=Homo sapiens OX=9606 GN=KLC1 PE=1 SV=1	33	68.7	5.96
B4DRC7	Tetratricopeptide repeat protein 27 OS=Homo sapiens OX=9606 PE=2 SV=1	40	90.9	5.83
Q86UK7	E3 ubiquitin-protein ligase ZNF598 OS=Homo sapiens OX=9606 GN=ZNF598 PE=1 SV=1	29	98.6	8.4
Q9NZ52	ADP-ribosylation factor-binding protein GGA3 OS=Homo sapiens OX=9606 GN=GGA3 PE=1 SV=1	42	78.3	5.58
A1L3Z9	Glutamine-rich 1 OS=Homo sapiens OX=9606 GN=QRICH1 PE=2 SV=1	34	86.4	5.87
Q8IY18	Structural maintenance of chromosomes protein 5 OS=Homo sapiens OX=9606 GN=SMC5 PE=1 SV=2	28	128.7	8.38
Q6IQ30	Polyadenylate-binding protein OS=Homo sapiens OX=9606 GN=PABPC4 PE=2 SV=1	33	72.3	9.35
Q9H0B6	Kinesin light chain 2 OS=Homo sapiens OX=9606 GN=KLC2 PE=1 SV=1	41	68.9	7.15
O43290	U4/U6.U5 tri-snRNP-associated protein 1 OS=Homo sapiens OX=9606 GN=SART1 PE=1 SV=1	33	90.2	6.13
Q92896	Golgi apparatus protein 1 OS=Homo sapiens OX=9606 GN=GLG1 PE=1 SV=2	26	134.5	6.9
P04259	Keratin, type II cytoskeletal 6B OS=Homo sapiens OX=9606 GN=KRT6B PE=1 SV=5	40	60	8
Q8IYB7	DIS3-like exonuclease 2 OS=Homo sapiens OX=9606 GN=DIS3L2 PE=1 SV=4	34	99.2	6.1
A8K5S1	cDNA FLJ78650, highly similar to Homo sapiens mucosa associated lymphoid tissue lymphoma translocation gene 1 (MALT1), transcript variant 1, mRNA OS=Homo sapiens OX=9606 PE=2 SV=1	36	92.2	5.73
Q9GZR7	ATP-dependent RNA helicase DDX24 OS=Homo sapiens OX=9606 GN=DDX24 PE=1 SV=1	26	96.3	9.06
Q6P2E9	Enhancer of mRNA-decapping protein 4 OS=Homo sapiens OX=9606 GN=EDC4 PE=1 SV=1	20	151.6	5.86
A0A024QYZ6	Exocyst complex component 3 OS=Homo sapiens OX=9606 GN=EXOC3 PE=3 SV=1	24	85.5	6.29
B4DUC2	cDNA FLJ54483, highly similar to Serine/threonine-protein kinase tousled-like 2 OS=Homo sapiens OX=9606 PE=2 SV=1	32	82.4	8.18
Q9H9Y6	DNA-directed RNA polymerase I subunit RPA2 OS=Homo sapiens OX=9606 GN=POLR1B PE=1 SV=2	27	128.1	7.83
Q9UKM7	Endoplasmic reticulum mannosyl-oligosaccharide 1,2-alpha-mannosidase OS=Homo sapiens OX=9606 GN=MAN1B1 PE=1 SV=2	24	79.5	7.72
Q13136	Liprin-alpha-1 OS=Homo sapiens OX=9606 GN=PPFIA1 PE=1 SV=1	26	135.7	6.29
P43246	DNA mismatch repair protein Msh2 OS=Homo sapiens OX=9606 GN=MSH2 PE=1 SV=1	31	104.7	5.77
P46087	Probable 28S rRNA (cytosine(4447)-C(5))-methyltransferase OS=Homo sapiens OX=9606 GN=NOP2 PE=1 SV=2	35	89.2	9.23
Q9UBD5	Origin recognition complex subunit 3 OS=Homo sapiens OX=9606 GN=ORC3 PE=1 SV=1	34	82.2	7.61
Q5T8P6	RNA-binding protein 26 OS=Homo sapiens OX=9606 GN=RBM26 PE=1 SV=3	22	113.5	9.16
Q86VR6	RNA helicase (Fragment) OS=Homo sapiens OX=9606 GN=DDX10 PE=2 SV=1	35	85.8	9.22
Q5QJE6	Deoxynucleotidyltransferase terminal-interacting protein 2 OS=Homo sapiens OX=9606 GN=DNTTIP2 PE=1 SV=2	28	84.4	6.16
A8K8Z3	cDNA FLJ77613, highly similar to Homo sapiens tousled-like kinase 1 (TLK1), mRNA OS=Homo sapiens OX=9606 PE=2 SV=1	27	86.6	8.72
Q96EN8	Molybdenum cofactor sulfurase OS=Homo sapiens OX=9606 GN=MOCOS PE=1 SV=2	31	98.1	6.7
A0A024R5S9	E3 ubiquitin-protein ligase OS=Homo sapiens OX=9606 GN=NEDD4 PE=4 SV=1	31	104.1	5.92
B3KS06	Vacuolar protein sorting-associated protein 53 homolog OS=Homo sapiens OX=9606 PE=2 SV=1	55	56.7	6.47
Q9H8V3	Protein ECT2 OS=Homo sapiens OX=9606 GN=ECT2 PE=1 SV=4	29	103.4	7.71
A3F769	NF-kappaB repressing factor OS=Homo sapiens OX=9606 GN=NRF PE=2 SV=1	37	77.6	8.79
Q5SSJ5	Heterochromatin protein 1-binding protein 3 OS=Homo sapiens OX=9606 GN=HP1BP3 PE=1 SV=1	37	61.2	9.67
Q2PNX9	Phosphatidic acid-preferring phospholipase A1 OS=Homo sapiens OX=9606 PE=2 SV=1	34	83.1	5.83
Q8NHH9	Atlastin-2 OS=Homo sapiens OX=9606 GN=ATL2 PE=1 SV=2	35	66.2	5.48
A0A7I2YQV8	Heterogeneous nuclear ribonucleoprotein Q OS=Homo sapiens OX=9606 GN=SYNCRIP PE=1 SV=1	38	51.9	8.31
Q8N3E9	1-phosphatidylinositol 4,5-bisphosphate phosphodiesterase delta-3 OS=Homo sapiens OX=9606 GN=PLCD3 PE=1 SV=3	34	89.2	6.98
Q96D46	60S ribosomal export protein NMD3 OS=Homo sapiens OX=9606 GN=NMD3 PE=1 SV=1	50	57.6	7.14
A0A024RDB2	Ras-GTPase activating protein SH3 domain-binding protein 2, isoform CRA_b OS=Homo sapiens OX=9606 GN=G3BP2 PE=4 SV=1	40	50.8	5.38
Q8N163	Cell cycle and apoptosis regulator protein 2 OS=Homo sapiens OX=9606 GN=CCAR2 PE=1 SV=2	30	102.8	5.22
Q8IV36	Protein HID1 OS=Homo sapiens OX=9606 GN=HID1 PE=1 SV=1	32	88.7	6.06
Q8NBJ5	Procollagen galactosyltransferase 1 OS=Homo sapiens OX=9606 GN=COLGALT1 PE=1 SV=1	39	71.6	7.31
Q9Y620	DNA repair and recombination protein RAD54B OS=Homo sapiens OX=9606 GN=RAD54B PE=1 SV=1	26	102.9	8.12
Q9NV88	Integrator complex subunit 9 OS=Homo sapiens OX=9606 GN=INTS9 PE=1 SV=2	46	73.8	6.33
Q8TCS8	Polyribonucleotide nucleotidyltransferase 1, mitochondrial OS=Homo sapiens OX=9606 GN=PNPT1 PE=1 SV=2	38	85.9	7.77
O14641	Segment polarity protein dishevelled homolog DVL-2 OS=Homo sapiens OX=9606 GN=DVL2 PE=1 SV=1	32	78.9	6.02
A0A384MTS3	Epididymis secretory sperm binding protein OS=Homo sapiens OX=9606 PE=2 SV=1	28	92.5	7.96
A5PL36	USP19 protein (Fragment) OS=Homo sapiens OX=9606 GN=USP19 PE=2 SV=1	22	158.9	6.98
P69905	Hemoglobin subunit alpha OS=Homo sapiens OX=9606 GN=HBA2 PE=1 SV=2	74	15.2	8.68
R9QDW5	Signal transducer and activator of transcription OS=Homo sapiens OX=9606 GN=STAT2 PE=3 SV=1	31	97.9	5.49
P23229	Integrin alpha-6 OS=Homo sapiens OX=9606 GN=ITGA6 PE=1 SV=5	26	126.5	6.61
B3KXH8	cDNA FLJ45417 fis, clone BRHIP3033811, highly similar to Sorting nexin-9 OS=Homo sapiens OX=9606 PE=2 SV=1	51	45.6	8.15
Q2NKM7	DDX11 protein OS=Homo sapiens OX=9606 GN=DDX11 PE=2 SV=1	23	101.6	7.56
A0A0B4J1S8	Phosphatidylinositol 4-kinase beta OS=Homo sapiens OX=9606 GN=PI4KB PE=1 SV=1	26	92.7	6.32
A0A0A0MTB8	WD repeat-containing protein 36 OS=Homo sapiens OX=9606 GN=WDR36 PE=1 SV=1	31	99.3	7.36
Q86U44	N6-adenosine-methyltransferase catalytic subunit OS=Homo sapiens OX=9606 GN=METTL3 PE=1 SV=2	39	64.4	6.42
B4DK32	cDNA FLJ61095, highly similar to Ubiquitin conjugation factor E4 A (Fragment) OS=Homo sapiens OX=9606 PE=2 SV=1	29	119.7	5.21
O75962	Triple functional domain protein OS=Homo sapiens OX=9606 GN=TRIO PE=1 SV=2	10	346.7	6.37
Q8WVV9	Heterogeneous nuclear ribonucleoprotein L-like OS=Homo sapiens OX=9606 GN=HNRNPLL PE=1 SV=1	39	60	7.72
Q96EY7	Pentatricopeptide repeat domain-containing protein 3, mitochondrial OS=Homo sapiens OX=9606 GN=PTCD3 PE=1 SV=3	32	78.5	6.42
B4DSD7	Serine/threonine-protein phosphatase 2A 56 kDa regulatory subunit OS=Homo sapiens OX=9606 PE=2 SV=1	38	65.4	7.83
O15327	Inositol polyphosphate 4-phosphatase type II OS=Homo sapiens OX=9606 GN=INPP4B PE=1 SV=4	33	104.7	6.27
F8WJN3	Cleavage and polyadenylation specificity factor subunit 6 OS=Homo sapiens OX=9606 GN=CPSF6 PE=1 SV=1	33	52.2	6.43
P51610	Host cell factor 1 OS=Homo sapiens OX=9606 GN=HCFC1 PE=1 SV=2	13	208.6	7.46
C9JFK9	BAG family molecular chaperone regulator 3 (Fragment) OS=Homo sapiens OX=9606 GN=BAG3 PE=1 SV=1	64	34.7	9.39
B7ZLW0	LPP protein OS=Homo sapiens OX=9606 GN=LPP PE=2 SV=1	42	65.7	7.37
P31040	Succinate dehydrogenase [ubiquinone] flavoprotein subunit, mitochondrial OS=Homo sapiens OX=9606 GN=SDHA PE=1 SV=2	36	72.6	7.39
A8K6K2	cDNA FLJ75877, highly similar to Homo sapiens 5'-nucleotidase, cytosolic II (NT5C2), mRNA OS=Homo sapiens OX=9606 PE=2 SV=1	32	64.9	6.14
A0A669KB89	Protein scribble homolog OS=Homo sapiens OX=9606 GN=SCRIB PE=1 SV=1	19	177.7	5.14
B2RTX8	WAPAL protein OS=Homo sapiens OX=9606 GN=WAPAL PE=2 SV=1	26	132.1	5.48
A0A0A0MTC1	E3 ubiquitin-protein ligase RNF213 OS=Homo sapiens OX=9606 GN=RNF213 PE=1 SV=1	7	596.1	6.42
Q15084	Protein disulfide-isomerase A6 OS=Homo sapiens OX=9606 GN=PDIA6 PE=1 SV=1	38	48.1	5.08
Q9NXF1	Testis-expressed protein 10 OS=Homo sapiens OX=9606 GN=TEX10 PE=1 SV=2	30	105.6	9.36
P52732	Kinesin-like protein KIF11 OS=Homo sapiens OX=9606 GN=KIF11 PE=1 SV=2	32	119.1	5.64
Q96FC9	ATP-dependent DNA helicase DDX11 OS=Homo sapiens OX=9606 GN=DDX11 PE=1 SV=1	22	108.2	7.31
Q05BV6	PIK3R2 protein OS=Homo sapiens OX=9606 GN=PIK3R2 PE=2 SV=1	48	52.7	6.19
A0A024R0F6	Tripartite motif-containing 33, isoform CRA_a OS=Homo sapiens OX=9606 GN=TRIM33 PE=4 SV=1	22	122.4	6.67
Q86V48	Leucine zipper protein 1 OS=Homo sapiens OX=9606 GN=LUZP1 PE=1 SV=2	24	120.2	8.5
Q96D71	RalBP1-associated Eps domain-containing protein 1 OS=Homo sapiens OX=9606 GN=REPS1 PE=1 SV=3	31	86.6	5.69
A0A7P0T871	Complex I assembly factor ACAD9, mitochondrial OS=Homo sapiens OX=9606 GN=ACAD9 PE=4 SV=1	33	72.5	7.4
Q9NVR0	Kelch-like protein 11 OS=Homo sapiens OX=9606 GN=KLHL11 PE=1 SV=1	27	80.1	6.16
Q96RN5	Mediator of RNA polymerase II transcription subunit 15 OS=Homo sapiens OX=9606 GN=MED15 PE=1 SV=2	19	86.7	9.42
P68871	Hemoglobin subunit beta OS=Homo sapiens OX=9606 GN=HBB PE=1 SV=2	82	16	7.28
Q01780	Exosome component 10 OS=Homo sapiens OX=9606 GN=EXOSC10 PE=1 SV=2	26	100.8	8.46
Q14161	ARF GTPase-activating protein GIT2 OS=Homo sapiens OX=9606 GN=GIT2 PE=1 SV=2	29	84.5	7.23
Q9UPU5	Ubiquitin carboxyl-terminal hydrolase 24 OS=Homo sapiens OX=9606 GN=USP24 PE=1 SV=3	12	294.2	6.14
B4E2X3	cDNA FLJ56024 OS=Homo sapiens OX=9606 PE=2 SV=1	35	78.6	6.73
P46934	E3 ubiquitin-protein ligase NEDD4 OS=Homo sapiens OX=9606 GN=NEDD4 PE=1 SV=4	18	149	6.58
Q96RS6	NudC domain-containing protein 1 OS=Homo sapiens OX=9606 GN=NUDCD1 PE=1 SV=2	44	66.7	5.11
O00469	Procollagen-lysine,2-oxoglutarate 5-dioxygenase 2 OS=Homo sapiens OX=9606 GN=PLOD2 PE=1 SV=2	37	84.6	6.71
A0A2R8YFS8	Breast cancer anti-estrogen resistance protein 1 OS=Homo sapiens OX=9606 GN=BCAR1 PE=1 SV=1	27	95.4	5.68
A5PKY0	EPS15L1 protein (Fragment) OS=Homo sapiens OX=9606 GN=EPS15L1 PE=2 SV=1	51	66.3	5.26
Q1KMD3	Heterogeneous nuclear ribonucleoprotein U-like protein 2 OS=Homo sapiens OX=9606 GN=HNRNPUL2 PE=1 SV=1	27	85.1	4.91
D3DUK1	Breast cancer anti-estrogen resistance 1, isoform CRA_a OS=Homo sapiens OX=9606 GN=BCAR1 PE=3 SV=1	27	95.1	5.74
A8K8N5	cDNA FLJ76940, highly similar to Homo sapiens ubiquitin specific peptidase 8 (USP8), mRNA OS=Homo sapiens OX=9606 PE=2 SV=1	23	127.4	8.56
B4DMD3	cDNA FLJ58174, highly similar to WW domain-binding protein 11 OS=Homo sapiens OX=9606 PE=2 SV=1	28	64.9	7.01
Q8IY81	pre-rRNA 2'-O-ribose RNA methyltransferase FTSJ3 OS=Homo sapiens OX=9606 GN=FTSJ3 PE=1 SV=2	34	96.5	8.4
B3KY60	cDNA FLJ16777 fis, clone BRHIP2029567, highly similar to Cell division cycle 5-like protein OS=Homo sapiens OX=9606 PE=2 SV=1	34	92.2	8.18
A0A0S2Z2Z6	Annexin (Fragment) OS=Homo sapiens OX=9606 GN=ANXA6 PE=2 SV=1	32	75.8	5.6
A8K3S3	Kinesin-like protein OS=Homo sapiens OX=9606 PE=2 SV=1	37	81.3	7.83
B7Z6N1	cDNA FLJ54385, highly similar to ETS domain-containing transcription factor ERF OS=Homo sapiens OX=9606 PE=2 SV=1	37	57.4	6.92
Q8IYT2	Cap-specific mRNA (nucleoside-2'-O-)-methyltransferase 2 OS=Homo sapiens OX=9606 GN=CMTR2 PE=1 SV=2	31	88.1	7.01
H9KV28	Protein diaphanous homolog 1 OS=Homo sapiens OX=9606 GN=DIAPH1 PE=1 SV=2	20	136.8	5.24
P57772	Selenocysteine-specific elongation factor OS=Homo sapiens OX=9606 GN=EEFSEC PE=1 SV=4	33	65.3	8.35
O95819	Mitogen-activated protein kinase kinase kinase kinase 4 OS=Homo sapiens OX=9606 GN=MAP4K4 PE=1 SV=2	21	142	7.46
Q96P48	Arf-GAP with Rho-GAP domain, ANK repeat and PH domain-containing protein 1 OS=Homo sapiens OX=9606 GN=ARAP1 PE=1 SV=3	18	162.1	6.23
A0A7P0T868	Protein AATF OS=Homo sapiens OX=9606 GN=AATF PE=4 SV=1	33	60.8	4.94
P19174	1-phosphatidylinositol 4,5-bisphosphate phosphodiesterase gamma-1 OS=Homo sapiens OX=9606 GN=PLCG1 PE=1 SV=1	22	148.4	6.05
Q9BXB5	Oxysterol-binding protein-related protein 10 OS=Homo sapiens OX=9606 GN=OSBPL10 PE=1 SV=2	35	83.9	8.31
Q01167	Forkhead box protein K2 OS=Homo sapiens OX=9606 GN=FOXK2 PE=1 SV=3	33	69	9.54
V9HWH7	5-aminoimidazole-4-carboxamide ribonucleotide formyltransferase OS=Homo sapiens OX=9606 GN=HEL-S-70p PE=2 SV=1	44	64.6	6.71
A0A024QZW7	Nucleoporin 153kDa, isoform CRA_a OS=Homo sapiens OX=9606 GN=NUP153 PE=4 SV=1	17	153.9	8.73
E7EN19	Mitogen-activated protein kinase kinase kinase kinase 4 OS=Homo sapiens OX=9606 GN=MAP4K4 PE=1 SV=1	20	144.8	7.49
A0A1W2PNW1	Signal transducer and activator of transcription (Fragment) OS=Homo sapiens OX=9606 GN=STAT6 PE=1 SV=2	23	88.8	6.35
Q8TC07	TBC1 domain family member 15 OS=Homo sapiens OX=9606 GN=TBC1D15 PE=1 SV=2	36	79.4	5.67
Q9BXW9	Fanconi anemia group D2 protein OS=Homo sapiens OX=9606 GN=FANCD2 PE=1 SV=2	20	164	5.88
Q15942	Zyxin OS=Homo sapiens OX=9606 GN=ZYX PE=1 SV=1	28	61.2	6.67
A0A6Q8PHK0	E3 ubiquitin-protein ligase TRIP12 OS=Homo sapiens OX=9606 GN=TRIP12 PE=1 SV=1	16	228.3	8.6
H0YKT5	Transducin-like enhancer protein 3 OS=Homo sapiens OX=9606 GN=TLE3 PE=1 SV=1	33	83.5	7.17
Q53F02	Cleavage and polyadenylation specific factor 3, 73kDa variant (Fragment) OS=Homo sapiens OX=9606 PE=2 SV=1	41	77.4	5.66
Q9UQ16	Dynamin-3 OS=Homo sapiens OX=9606 GN=DNM3 PE=1 SV=4	25	97.7	8.35
Q86YV9	Hermansky-Pudlak syndrome 6 protein OS=Homo sapiens OX=9606 GN=HPS6 PE=1 SV=1	36	82.9	6.28
B7ZLJ0	DIAPH2 protein OS=Homo sapiens OX=9606 GN=DIAPH2 PE=2 SV=1	25	125.4	6.51
A0A0G2JQH3	Cytoplasmic FMR1-interacting protein 1 (Fragment) OS=Homo sapiens OX=9606 GN=CYFIP1 PE=1 SV=1	48	21.1	8.94
Q96QU8	Exportin-6 OS=Homo sapiens OX=9606 GN=XPO6 PE=1 SV=1	26	128.8	6.35
E9PHA2	Condensin complex subunit 2 OS=Homo sapiens OX=9606 GN=NCAPH PE=1 SV=1	29	81.5	5.06
Q2VF42	Glucose-6-phosphate 1-dehydrogenase (Fragment) OS=Homo sapiens OX=9606 GN=G6PD PE=3 SV=1	45	54.8	7.28
Q96P47	Arf-GAP with GTPase, ANK repeat and PH domain-containing protein 3 OS=Homo sapiens OX=9606 GN=AGAP3 PE=1 SV=2	25	95	7.97
A0A384NYG5	Mediator of RNA polymerase II transcription subunit 17 OS=Homo sapiens OX=9606 GN=MED17 PE=2 SV=1	39	72.8	7.44
A0A024R843	Tripartite motif-containing 32, isoform CRA_a OS=Homo sapiens OX=9606 GN=TRIM32 PE=3 SV=1	48	71.9	6.98
B5BU25	U2 snRNP auxiliary factor large subunit OS=Homo sapiens OX=9606 GN=U2AF2 PE=2 SV=1	45	53.1	9.09
Q86WA8	Lon protease homolog 2, peroxisomal OS=Homo sapiens OX=9606 GN=LONP2 PE=1 SV=1	32	94.6	7.3
R4GNG3	ARF GTPase-activating protein GIT2 (Fragment) OS=Homo sapiens OX=9606 GN=GIT2 PE=1 SV=1	32	71.5	6.58
Q14573	Inositol 1,4,5-trisphosphate receptor type 3 OS=Homo sapiens OX=9606 GN=ITPR3 PE=1 SV=2	14	303.9	6.48
A0A6Q8PFA6	Kinesin-like protein OS=Homo sapiens OX=9606 GN=KIF2A PE=1 SV=1	32	78	6.68
O14672	Disintegrin and metalloproteinase domain-containing protein 10 OS=Homo sapiens OX=9606 GN=ADAM10 PE=1 SV=1	31	84.1	7.77
Q86X55	Histone-arginine methyltransferase CARM1 OS=Homo sapiens OX=9606 GN=CARM1 PE=1 SV=3	36	65.8	6.73
Q6ZRP7	Sulfhydryl oxidase 2 OS=Homo sapiens OX=9606 GN=QSOX2 PE=1 SV=3	29	77.5	7.72
B3KNC3	Nucleolar complex protein 2 homolog OS=Homo sapiens OX=9606 PE=2 SV=1	27	84.9	5.62
Q96SB3	Neurabin-2 OS=Homo sapiens OX=9606 GN=PPP1R9B PE=1 SV=3	28	89.3	4.97
Q9Y2X0	Mediator of RNA polymerase II transcription subunit 16 OS=Homo sapiens OX=9606 GN=MED16 PE=1 SV=2	28	96.7	7.37
B0UZZ8	Chromosome 6 open reading frame 11 OS=Homo sapiens OX=9606 GN=C6orf11 PE=2 SV=1	35	68	9.67
Q9H4M9	EH domain-containing protein 1 OS=Homo sapiens OX=9606 GN=EHD1 PE=1 SV=2	44	60.6	6.83
Q9Y6M1	Insulin-like growth factor 2 mRNA-binding protein 2 OS=Homo sapiens OX=9606 GN=IGF2BP2 PE=1 SV=2	35	66.1	8.46
Q9UI26	Importin-11 OS=Homo sapiens OX=9606 GN=IPO11 PE=1 SV=1	24	112.5	5.25
E5KRK5	Complex I-75kD OS=Homo sapiens OX=9606 GN=NDUFS1 PE=3 SV=1	34	79.4	6.23
Q16512	Serine/threonine-protein kinase N1 OS=Homo sapiens OX=9606 GN=PKN1 PE=1 SV=2	29	103.9	6.37
Q4KMP7	TBC1 domain family member 10B OS=Homo sapiens OX=9606 GN=TBC1D10B PE=1 SV=3	31	87.1	9.19
E2RVJ0	Anion exchange protein OS=Homo sapiens OX=9606 GN=SLC4A1 PE=2 SV=1	23	101.9	5.22
B2RNR6	Zinc finger RNA binding protein OS=Homo sapiens OX=9606 GN=ZFR PE=2 SV=1	17	116.9	9.04
Q8WUA4	General transcription factor 3C polypeptide 2 OS=Homo sapiens OX=9606 GN=GTF3C2 PE=1 SV=2	29	100.6	7.31
Q53GS9	U4/U6.U5 tri-snRNP-associated protein 2 OS=Homo sapiens OX=9606 GN=USP39 PE=1 SV=2	33	65.3	8.91
P06733	Alpha-enolase OS=Homo sapiens OX=9606 GN=ENO1 PE=1 SV=2	55	47.1	7.39
Q96PE3	Inositol polyphosphate-4-phosphatase type I A OS=Homo sapiens OX=9606 GN=INPP4A PE=1 SV=1	30	109.9	6.96
E9PK91	Bcl-2-associated transcription factor 1 OS=Homo sapiens OX=9606 GN=BCLAF1 PE=1 SV=1	22	100.3	9.95
A0A2U3TZM0	DNA helicase OS=Homo sapiens OX=9606 GN=CHD4 PE=1 SV=1	15	216.7	6
O75427	Leucine-rich repeat and calponin homology domain-containing protein 4 OS=Homo sapiens OX=9606 GN=LRCH4 PE=1 SV=2	38	73.4	8.22
A0A087X295	WD repeat-containing protein 6 OS=Homo sapiens OX=9606 GN=WDR6 PE=1 SV=1	28	124.9	6.92
A0A024R8D6	Protein kinase C OS=Homo sapiens OX=9606 GN=PKN3 PE=4 SV=1	26	99.4	8.46
A0A024R534	Metastasis associated 1 family, member 2, isoform CRA_a OS=Homo sapiens OX=9606 GN=MTA2 PE=4 SV=1	34	75	9.66
Q9ULT8	E3 ubiquitin-protein ligase HECTD1 OS=Homo sapiens OX=9606 GN=HECTD1 PE=1 SV=3	11	289.2	5.35
A8K6U7	cDNA FLJ78252, highly similar to Homo sapiens heterogeneous nuclear ribonucleoprotein U-like 1 (HNRPUL1), transcript variant 1, mRNA OS=Homo sapiens OX=9606 PE=2 SV=1	20	95.6	6.92
O15031	Plexin-B2 OS=Homo sapiens OX=9606 GN=PLXNB2 PE=1 SV=3	15	205	6.24
A0A2X0U2H5	DOCK1 (Fragment) OS=Homo sapiens OX=9606 GN=DOCK1 PE=3 SV=1	14	215.2	7.56
Q8N8S7	Protein enabled homolog OS=Homo sapiens OX=9606 GN=ENAH PE=1 SV=2	33	66.5	6.93
A0A1U9X9B3	Valyl-tRNA synthetase OS=Homo sapiens OX=9606 PE=3 SV=1	22	121.5	7.14
Q8TDD1	ATP-dependent RNA helicase DDX54 OS=Homo sapiens OX=9606 GN=DDX54 PE=1 SV=2	31	98.5	10.02
O75113	NEDD4-binding protein 1 OS=Homo sapiens OX=9606 GN=N4BP1 PE=1 SV=4	31	100.3	5.36
B2RAT5	cDNA, FLJ95100, highly similar to Homo sapiens up-regulated gene 4 (URG4), mRNA OS=Homo sapiens OX=9606 PE=2 SV=1	23	104	6.48
A8K8F9	Phosphoinositide phospholipase C OS=Homo sapiens OX=9606 PE=2 SV=1	32	85.6	6.7
Q12797	Aspartyl/asparaginyl beta-hydroxylase OS=Homo sapiens OX=9606 GN=ASPH PE=1 SV=3	26	85.8	5.01
O95235	Kinesin-like protein KIF20A OS=Homo sapiens OX=9606 GN=KIF20A PE=1 SV=1	27	100.2	6.92
Q02880	DNA topoisomerase 2-beta OS=Homo sapiens OX=9606 GN=TOP2B PE=1 SV=3	17	183.2	8
Q709C8	Vacuolar protein sorting-associated protein 13C OS=Homo sapiens OX=9606 GN=VPS13C PE=1 SV=1	8	422.1	6.83
B4E1E2	Hepatocyte growth factor-regulated tyrosine kinase substrate OS=Homo sapiens OX=9606 PE=2 SV=1	23	74.8	7.99
Q9NX98	Oxysterol-binding protein OS=Homo sapiens OX=9606 PE=2 SV=1	41	65.9	7.36
Q8ND04	Protein SMG8 OS=Homo sapiens OX=9606 GN=SMG8 PE=1 SV=1	32	109.6	7.68
Q68CQ4	U3 small nucleolar RNA-associated protein 25 homolog OS=Homo sapiens OX=9606 GN=UTP25 PE=1 SV=2	40	87	5.88
Q68CN4	Uncharacterized protein OS=Homo sapiens OX=9606 GN=DKFZp686E23209 PE=1 SV=2	19	51.5	7.56
Q6AI08	HEAT repeat-containing protein 6 OS=Homo sapiens OX=9606 GN=HEATR6 PE=1 SV=1	24	128.7	7.03
Q15269	Periodic tryptophan protein 2 homolog OS=Homo sapiens OX=9606 GN=PWP2 PE=2 SV=2	26	102.4	6.15
A0A087WXK8	Chromosome 20 open reading frame 129 OS=Homo sapiens OX=9606 GN=FAM83D PE=1 SV=1	30	67.6	6.95
Q9UNY4	Transcription termination factor 2 OS=Homo sapiens OX=9606 GN=TTF2 PE=1 SV=2	19	129.5	8.37
O15344	E3 ubiquitin-protein ligase Midline-1 OS=Homo sapiens OX=9606 GN=MID1 PE=1 SV=1	32	75.2	6.8
B4DGE7	cDNA FLJ61235, weakly similar to WD repeat protein YBL104C OS=Homo sapiens OX=9606 PE=2 SV=1	29	98.6	6.8
Q9Y2W1	Thyroid hormone receptor-associated protein 3 OS=Homo sapiens OX=9606 GN=THRAP3 PE=1 SV=2	18	108.6	10.15
B7ZKS3	Ubiquitinyl hydrolase 1 OS=Homo sapiens OX=9606 GN=USP48 PE=2 SV=1	28	118.9	6
A0A6Q8KRG2	Golgin subfamily A member 2 OS=Homo sapiens OX=9606 GN=GOLGA2 PE=1 SV=1	20	111.6	5
Q14147	Probable ATP-dependent RNA helicase DHX34 OS=Homo sapiens OX=9606 GN=DHX34 PE=1 SV=2	29	128	7.56
Q969S9	Ribosome-releasing factor 2, mitochondrial OS=Homo sapiens OX=9606 GN=GFM2 PE=1 SV=1	30	86.5	6.51
B4DPY2	cDNA FLJ59286, highly similar to Pre-mRNA-processing factor 40 homolog A (Fragment) OS=Homo sapiens OX=9606 PE=2 SV=1	22	92.8	8.15
Q8ND24	RING finger protein 214 OS=Homo sapiens OX=9606 GN=RNF214 PE=1 SV=2	37	77.6	6.95
E9PKP7	Nucleolar transcription factor 1 OS=Homo sapiens OX=9606 GN=UBTF PE=1 SV=1	28	87.4	9.89
A0A024RB22	SWI/SNF related, matrix associated, actin dependent regulator of chromatin, subfamily c, member 2, isoform CRA_a OS=Homo sapiens OX=9606 GN=SMARCC2 PE=4 SV=1	15	132.8	5.69
O75400	Pre-mRNA-processing factor 40 homolog A OS=Homo sapiens OX=9606 GN=PRPF40A PE=1 SV=2	22	108.7	7.56
P08243	Asparagine synthetase [glutamine-hydrolyzing] OS=Homo sapiens OX=9606 GN=ASNS PE=1 SV=4	40	64.3	6.86
Q9BVA0	Katanin p80 WD40 repeat-containing subunit B1 OS=Homo sapiens OX=9606 GN=KATNB1 PE=1 SV=1	36	72.3	7.56
A0A140VJZ1	Ubiquitin carboxyl-terminal hydrolase OS=Homo sapiens OX=9606 PE=2 SV=1	23	95.7	5.03
B3KN06	Coronin OS=Homo sapiens OX=9606 PE=2 SV=1	34	53.2	6.93
Q9NSV4	Protein diaphanous homolog 3 OS=Homo sapiens OX=9606 GN=DIAPH3 PE=1 SV=4	19	136.8	7.03
Q12849	G-rich sequence factor 1 OS=Homo sapiens OX=9606 GN=GRSF1 PE=1 SV=3	39	53.1	6.19
O95251	Histone acetyltransferase KAT7 OS=Homo sapiens OX=9606 GN=KAT7 PE=1 SV=1	25	70.6	8.85
P01859	Immunoglobulin heavy constant gamma 2 OS=Homo sapiens OX=9606 GN=IGHG2 PE=1 SV=2	25	35.9	7.59
Q9Y4C2	TRPM8 channel-associated factor 1 OS=Homo sapiens OX=9606 GN=TCAF1 PE=1 SV=3	27	102.1	6.54
A0A140VJM0	Testicular tissue protein Li 96 OS=Homo sapiens OX=9606 PE=2 SV=1	18	116.5	6.77
Q9UNS1	Protein timeless homolog OS=Homo sapiens OX=9606 GN=TIMELESS PE=1 SV=2	21	138.6	5.4
O60343	TBC1 domain family member 4 OS=Homo sapiens OX=9606 GN=TBC1D4 PE=1 SV=2	17	146.5	7.01
Q8TBR3	Fusion (Involved in t(1216) in malignant liposarcoma) OS=Homo sapiens OX=9606 GN=FUS PE=2 SV=1	23	53.4	9.38
A0MNN4	CDW3/SMU1 OS=Homo sapiens OX=9606 GN=SMU1 PE=2 SV=1	39	57.5	7.18
Q6IT96	Histone deacetylase OS=Homo sapiens OX=9606 GN=HDAC1 PE=2 SV=1	38	55.1	5.48
Q5HYD7	Phosphoinositide phospholipase C OS=Homo sapiens OX=9606 GN=DKFZp686K101 PE=4 SV=1	31	88.1	7.14
Q9Y3I0	RNA-splicing ligase RtcB homolog OS=Homo sapiens OX=9606 GN=RTCB PE=1 SV=1	40	55.2	7.23
Q5HYM3	Oxysterol-binding protein OS=Homo sapiens OX=9606 GN=DKFZp686C0249 PE=2 SV=1	26	101.2	7.06
O60942	mRNA-capping enzyme OS=Homo sapiens OX=9606 GN=RNGTT PE=1 SV=1	31	68.5	8.13
Q4LDX3	Tyrosine-protein kinase OS=Homo sapiens OX=9606 GN=JAK1 PE=2 SV=1	21	131.6	7.61
Q9NVR2	Integrator complex subunit 10 OS=Homo sapiens OX=9606 GN=INTS10 PE=1 SV=2	27	82.2	7.44
P54652	Heat shock-related 70 kDa protein 2 OS=Homo sapiens OX=9606 GN=HSPA2 PE=1 SV=1	18	70	5.74
C9J164	Ras-associated and pleckstrin homology domains-containing protein 1 OS=Homo sapiens OX=9606 GN=RAPH1 PE=1 SV=1	39	67.1	5.94
B4DX78	RNA helicase OS=Homo sapiens OX=9606 PE=2 SV=1	43	53.7	5.9
Q6P1N0	Coiled-coil and C2 domain-containing protein 1A OS=Homo sapiens OX=9606 GN=CC2D1A PE=1 SV=1	22	104	8.09
Q8WVM7	Cohesin subunit SA-1 OS=Homo sapiens OX=9606 GN=STAG1 PE=1 SV=3	20	144.3	5.59
B3KRQ2	cDNA FLJ34689 fis, clone MESAN2000815, highly similar to Homo sapiens leucine zipper protein 5 (LUZP5), mRNA OS=Homo sapiens OX=9606 PE=2 SV=1	20	130.9	6.87
P52597	Heterogeneous nuclear ribonucleoprotein F OS=Homo sapiens OX=9606 GN=HNRNPF PE=1 SV=3	43	45.6	5.58
Q86SQ0	Pleckstrin homology-like domain family B member 2 OS=Homo sapiens OX=9606 GN=PHLDB2 PE=1 SV=2	16	142.1	7.43
Q8IZH2	5'-3' exoribonuclease 1 OS=Homo sapiens OX=9606 GN=XRN1 PE=1 SV=1	16	194	7.21
Q13838	Spliceosome RNA helicase DDX39B OS=Homo sapiens OX=9606 GN=DDX39B PE=1 SV=1	45	49	5.67
Q92615	La-related protein 4B OS=Homo sapiens OX=9606 GN=LARP4B PE=1 SV=3	33	80.5	6.92
Q99567	Nuclear pore complex protein Nup88 OS=Homo sapiens OX=9606 GN=NUP88 PE=1 SV=2	31	83.5	5.69
Q16555	Dihydropyrimidinase-related protein 2 OS=Homo sapiens OX=9606 GN=DPYSL2 PE=1 SV=1	41	62.3	6.38
G3V5N8	Zinc finger FYVE domain-containing protein 1 OS=Homo sapiens OX=9606 GN=ZFYVE1 PE=1 SV=1	26	88.4	7.55
Q8WTT2	Nucleolar complex protein 3 homolog OS=Homo sapiens OX=9606 GN=NOC3L PE=1 SV=1	26	92.5	9.17
Q16658	Fascin OS=Homo sapiens OX=9606 GN=FSCN1 PE=1 SV=3	33	54.5	7.24
C9JRJ5	LIM domain-containing protein 1 OS=Homo sapiens OX=9606 GN=LIMD1 PE=1 SV=1	25	65.5	7.46
B4DLA1	cDNA FLJ53453, highly similar to EH-domain-containing protein 2 OS=Homo sapiens OX=9606 PE=2 SV=1	36	60	6.55
B4DKV7	Epidermal growth factor receptor kinase substrate 8-like protein 1 OS=Homo sapiens OX=9606 GN=EPS8L1 PE=1 SV=1	24	73.3	5.97
Q9Y2H2	Phosphatidylinositide phosphatase SAC2 OS=Homo sapiens OX=9606 GN=INPP5F PE=1 SV=3	21	128.3	7.02
Q6IA86	Elongator complex protein 2 OS=Homo sapiens OX=9606 GN=ELP2 PE=1 SV=2	26	92.4	5.96
X5D963	Myotubularin related protein 10 isoform C (Fragment) OS=Homo sapiens OX=9606 GN=MTMR10 PE=2 SV=1	24	88.2	8.53
Q9UK43	Chondrosarcoma-associated protein 2 OS=Homo sapiens OX=9606 GN=CSA2 PE=2 SV=1	32	65.5	6.64
Q6GQQ9	OTU domain-containing protein 7B OS=Homo sapiens OX=9606 GN=OTUD7B PE=1 SV=1	19	92.5	6.71
Q96II8	DISP complex protein LRCH3 OS=Homo sapiens OX=9606 GN=LRCH3 PE=1 SV=2	34	86	6.71
X5D2E5	Chromodomain helicase DNA binding protein 1-like isoform A (Fragment) OS=Homo sapiens OX=9606 GN=CHD1L PE=2 SV=1	22	100.9	6.89
P04406	Glyceraldehyde-3-phosphate dehydrogenase OS=Homo sapiens OX=9606 GN=GAPDH PE=1 SV=3	61	36	8.46
E7EX73	Eukaryotic translation initiation factor 4 gamma 1 OS=Homo sapiens OX=9606 GN=EIF4G1 PE=1 SV=1	17	158.5	5.21
Q01432	AMP deaminase 3 OS=Homo sapiens OX=9606 GN=AMPD3 PE=1 SV=1	27	88.8	6.98
B4DVJ0	Glucose-6-phosphate isomerase OS=Homo sapiens OX=9606 PE=2 SV=1	33	60	8.65
Q6P9B9	Integrator complex subunit 5 OS=Homo sapiens OX=9606 GN=INTS5 PE=1 SV=1	22	107.9	7.05
P29144	Tripeptidyl-peptidase 2 OS=Homo sapiens OX=9606 GN=TPP2 PE=1 SV=4	23	138.3	6.32
Q5T6F2	Ubiquitin-associated protein 2 OS=Homo sapiens OX=9606 GN=UBAP2 PE=1 SV=1	21	117	7.34
Q8IWX8	Calcium homeostasis endoplasmic reticulum protein OS=Homo sapiens OX=9606 GN=CHERP PE=1 SV=3	18	103.6	9.04
P27986	Phosphatidylinositol 3-kinase regulatory subunit alpha OS=Homo sapiens OX=9606 GN=PIK3R1 PE=1 SV=2	29	83.5	6.16
Q6PJT7	Zinc finger CCCH domain-containing protein 14 OS=Homo sapiens OX=9606 GN=ZC3H14 PE=1 SV=1	25	82.8	7.31
Q13823	Nucleolar GTP-binding protein 2 OS=Homo sapiens OX=9606 GN=GNL2 PE=1 SV=1	29	83.6	9.25
B5BUB1	RuvB-like helicase (Fragment) OS=Homo sapiens OX=9606 GN=RUVBL1 PE=2 SV=1	35	50.2	6.42
B4DY32	Asparagine synthetase [glutamine-hydrolyzing] OS=Homo sapiens OX=9606 PE=2 SV=1	44	54.8	6.4
P34897	Serine hydroxymethyltransferase, mitochondrial OS=Homo sapiens OX=9606 GN=SHMT2 PE=1 SV=3	37	56	8.53
Q96Q15	Serine/threonine-protein kinase SMG1 OS=Homo sapiens OX=9606 GN=SMG1 PE=1 SV=3	8	410.2	6.46
Q9Y6W5	Wiskott-Aldrich syndrome protein family member 2 OS=Homo sapiens OX=9606 GN=WASF2 PE=1 SV=3	22	54.3	5.53
Q9BW27	Nuclear pore complex protein Nup85 OS=Homo sapiens OX=9606 GN=NUP85 PE=1 SV=1	23	75	5.55
Q96EP0	E3 ubiquitin-protein ligase RNF31 OS=Homo sapiens OX=9606 GN=RNF31 PE=1 SV=1	26	119.6	6.57
Q9H9A5	CCR4-NOT transcription complex subunit 10 OS=Homo sapiens OX=9606 GN=CNOT10 PE=1 SV=1	28	82.3	7.78
Q71RC2	La-related protein 4 OS=Homo sapiens OX=9606 GN=LARP4 PE=1 SV=3	31	80.5	6.61
P25705	ATP synthase subunit alpha, mitochondrial OS=Homo sapiens OX=9606 GN=ATP5F1A PE=1 SV=1	31	59.7	9.13
Q8IXT5	RNA-binding protein 12B OS=Homo sapiens OX=9606 GN=RBM12B PE=1 SV=2	24	118	6.81
Q9BPZ7	Target of rapamycin complex 2 subunit MAPKAP1 OS=Homo sapiens OX=9606 GN=MAPKAP1 PE=1 SV=2	36	59.1	7.55
Q9Y2Z2	Protein MTO1 homolog, mitochondrial OS=Homo sapiens OX=9606 GN=MTO1 PE=1 SV=2	25	79.9	8.31
P55795	Heterogeneous nuclear ribonucleoprotein H2 OS=Homo sapiens OX=9606 GN=HNRNPH2 PE=1 SV=1	23	49.2	6.3
A0A6Q8PFI7	E3 ubiquitin-protein ligase OS=Homo sapiens OX=9606 GN=NEDD4L PE=1 SV=1	22	109.4	6.02
E7EUI6	Integrin beta OS=Homo sapiens OX=9606 GN=ITGB1 PE=1 SV=2	21	88.7	5.44
B7Z7Y3	cDNA FLJ61618, highly similar to Discoidin, CUB and LCCL domain-containing protein 2 OS=Homo sapiens OX=9606 PE=2 SV=1	30	73.7	6.92
Q0IIM8	TBC1 domain family member 8B OS=Homo sapiens OX=9606 GN=TBC1D8B PE=1 SV=2	21	128.6	5.95
V9HWB7	Citrate hydro-lyase OS=Homo sapiens OX=9606 GN=HEL60 PE=2 SV=1	28	98.3	6.68
Q8N543	Prolyl 3-hydroxylase OGFOD1 OS=Homo sapiens OX=9606 GN=OGFOD1 PE=1 SV=1	25	63.2	5.11
A0A024R9Y3	HECT-type E3 ubiquitin transferase OS=Homo sapiens OX=9606 GN=HUWE1 PE=4 SV=1	5	479.9	5.21
A0A024R8L7	Acyl-coenzyme A oxidase OS=Homo sapiens OX=9606 GN=ACOX1 PE=3 SV=1	37	74.6	7.62
Q9UKV3	Apoptotic chromatin condensation inducer in the nucleus OS=Homo sapiens OX=9606 GN=ACIN1 PE=1 SV=2	14	151.8	6.43
Q8IXQ6	Protein mono-ADP-ribosyltransferase PARP9 OS=Homo sapiens OX=9606 GN=PARP9 PE=1 SV=2	25	96.3	7.91
Q12840	Kinesin heavy chain isoform 5A OS=Homo sapiens OX=9606 GN=KIF5A PE=1 SV=2	14	117.3	5.9
Q9UMS4	Pre-mRNA-processing factor 19 OS=Homo sapiens OX=9606 GN=PRPF19 PE=1 SV=1	30	55.1	6.61
O95140	Mitofusin-2 OS=Homo sapiens OX=9606 GN=MFN2 PE=1 SV=3	27	86.3	6.98
Q32P28	Prolyl 3-hydroxylase 1 OS=Homo sapiens OX=9606 GN=P3H1 PE=1 SV=2	21	83.3	5.14
Q8TE01	DERP12 (Dermal papilla derived protein 12) OS=Homo sapiens OX=9606 GN=derp12 PE=2 SV=1	45	38.2	6.58
Q9H0K6	Pseudouridylate synthase 7 homolog-like protein OS=Homo sapiens OX=9606 GN=PUS7L PE=1 SV=1	36	80.6	7.56
A0A024R2I9	Ankyrin repeat domain 28, isoform CRA_c OS=Homo sapiens OX=9606 GN=ANKRD28 PE=4 SV=1	20	112.9	6.25
A0A1U9X982	PRRC2A OS=Homo sapiens OX=9606 PE=4 SV=1	11	228.7	9.45
O60518	Ran-binding protein 6 OS=Homo sapiens OX=9606 GN=RANBP6 PE=1 SV=2	17	124.6	5.01
A0A7P0T9I9	Nicotinamide phosphoribosyltransferase OS=Homo sapiens OX=9606 GN=NAMPT PE=4 SV=1	40	55.2	6.99
Q2VPE5	TJP3 protein (Fragment) OS=Homo sapiens OX=9606 GN=TJP3 PE=2 SV=2	18	101.1	6.79
A0A140VJQ8	Paxillin OS=Homo sapiens OX=9606 GN=PXN PE=2 SV=1	26	64.5	6.19
Q14692	Ribosome biogenesis protein BMS1 homolog OS=Homo sapiens OX=9606 GN=BMS1 PE=1 SV=1	19	145.7	6.44
A0A7I2V535	Non-POU domain-containing octamer-binding protein OS=Homo sapiens OX=9606 GN=NONO PE=1 SV=1	30	57.6	9.33
Q8TD16	Protein bicaudal D homolog 2 OS=Homo sapiens OX=9606 GN=BICD2 PE=1 SV=1	25	93.5	5.44
Q9Y520	Protein PRRC2C OS=Homo sapiens OX=9606 GN=PRRC2C PE=1 SV=4	11	316.7	9.13
Q9UJX4	Anaphase-promoting complex subunit 5 OS=Homo sapiens OX=9606 GN=ANAPC5 PE=1 SV=2	23	85	6.87
M0QZ22	Protein Smaug homolog 2 OS=Homo sapiens OX=9606 GN=SAMD4B PE=1 SV=1	28	75.2	6.93
Q14TF0	Glutamate--cysteine ligase OS=Homo sapiens OX=9606 GN=GCLC PE=2 SV=1	34	72.7	6.09
Q9NYU1	UDP-glucose:glycoprotein glucosyltransferase 2 OS=Homo sapiens OX=9606 GN=UGGT2 PE=1 SV=4	15	174.6	6.89
A0A2X0SFB3	ARHGAP10 OS=Homo sapiens OX=9606 GN=ARHGAP10 PE=4 SV=1	21	89.3	7.18
B3KRG2	DNA excision repair protein ERCC-3 OS=Homo sapiens OX=9606 PE=2 SV=1	32	82	7.87
Q14156	Protein EFR3 homolog A OS=Homo sapiens OX=9606 GN=EFR3A PE=1 SV=2	22	92.9	6.7
B7ZKU7	Breast carcinoma amplified sequence 3 OS=Homo sapiens OX=9606 GN=BCAS3 PE=2 SV=1	26	99.6	6.64
M0R2P6	SH3KBP1 binding protein 1, isoform CRA_c OS=Homo sapiens OX=9606 GN=SHKBP1 PE=1 SV=1	27	73.7	8.4
B2RDX0	cDNA, FLJ96805, highly similar to Homo sapiens SHC SH2-domain binding protein 1 (SHCBP1), mRNA OS=Homo sapiens OX=9606 PE=2 SV=1	27	75.6	4.75
Q96BT7	Alkylated DNA repair protein alkB homolog 8 OS=Homo sapiens OX=9606 GN=ALKBH8 PE=1 SV=2	30	75.2	7.99
Q69YN4	Protein virilizer homolog OS=Homo sapiens OX=9606 GN=VIRMA PE=1 SV=2	10	201.9	5.01
D3DPU2	Adenylyl cyclase-associated protein OS=Homo sapiens OX=9606 GN=CAP1 PE=2 SV=1	43	51.6	8.02
Q92817	Envoplakin OS=Homo sapiens OX=9606 GN=EVPL PE=1 SV=3	10	231.5	6.96
Q9H2P0	Activity-dependent neuroprotector homeobox protein OS=Homo sapiens OX=9606 GN=ADNP PE=1 SV=1	24	123.5	7.34
O00418	Eukaryotic elongation factor 2 kinase OS=Homo sapiens OX=9606 GN=EEF2K PE=1 SV=2	23	82.1	5.33
A0A220T1R9	ANKLE2 OS=Homo sapiens OX=9606 GN=ANKLE2 PE=2 SV=1	26	97.5	6.81
B2RTS4	Centrosomal protein 170kDa OS=Homo sapiens OX=9606 GN=CEP170 PE=2 SV=1	15	164.5	7.24
O15357	Phosphatidylinositol 3,4,5-trisphosphate 5-phosphatase 2 OS=Homo sapiens OX=9606 GN=INPPL1 PE=1 SV=2	18	138.5	6.54
Q71SY5	Mediator of RNA polymerase II transcription subunit 25 OS=Homo sapiens OX=9606 GN=MED25 PE=1 SV=2	18	78.1	8.34
H0Y488	AT-rich interactive domain-containing protein 1A OS=Homo sapiens OX=9606 GN=ARID1A PE=1 SV=2	11	205.7	6.73
E9PHV5	Protein ITPRID2 OS=Homo sapiens OX=9606 GN=ITPRID2 PE=1 SV=1	14	136.1	5.2
B7Z532	cDNA FLJ51028, highly similar to 60 kDa heat shock protein, mitochondrial OS=Homo sapiens OX=9606 PE=2 SV=1	48	26.7	5.22
A0A024R711	E3 ubiquitin-protein ligase OS=Homo sapiens OX=9606 GN=WWP2 PE=4 SV=1	22	98.9	7.12
A0A0S2Z4W4	RNA binding motif protein 10 isoform 2 (Fragment) OS=Homo sapiens OX=9606 GN=RBM10 PE=2 SV=1	18	103.5	5.97
Q86XL3	Ankyrin repeat and LEM domain-containing protein 2 OS=Homo sapiens OX=9606 GN=ANKLE2 PE=1 SV=4	23	104.1	7.09
A8K874	N-alpha-acetyltransferase 35, NatC auxiliary subunit OS=Homo sapiens OX=9606 PE=2 SV=1	29	83.6	7.05
P51617	Interleukin-1 receptor-associated kinase 1 OS=Homo sapiens OX=9606 GN=IRAK1 PE=1 SV=2	28	76.5	6.62
O75475	PC4 and SFRS1-interacting protein OS=Homo sapiens OX=9606 GN=PSIP1 PE=1 SV=1	30	60.1	9.13
O94826	Mitochondrial import receptor subunit TOM70 OS=Homo sapiens OX=9606 GN=TOMM70 PE=1 SV=1	34	67.4	7.12
Q8WUA2	Peptidyl-prolyl cis-trans isomerase-like 4 OS=Homo sapiens OX=9606 GN=PPIL4 PE=1 SV=1	36	57.2	5.92
A0A0D9SFB1	Dynamin GTPase OS=Homo sapiens OX=9606 GN=DNM1 PE=1 SV=1	17	94	6.64
P11388	DNA topoisomerase 2-alpha OS=Homo sapiens OX=9606 GN=TOP2A PE=1 SV=3	13	174.3	8.72
Q96ED9	Protein Hook homolog 2 OS=Homo sapiens OX=9606 GN=HOOK2 PE=1 SV=3	22	83.2	5.47
Q6PKG0	La-related protein 1 OS=Homo sapiens OX=9606 GN=LARP1 PE=1 SV=2	17	123.4	8.82
Q8IZ52	Chondroitin sulfate synthase 2 OS=Homo sapiens OX=9606 GN=CHPF PE=1 SV=2	33	85.4	6.93
Q1WWM3	Band 4.1 (Fragment) OS=Homo sapiens OX=9606 GN=EPB41 PE=2 SV=1	23	83.2	5.72
Q5ZEZ4	Alpha-actinin 1 (Fragment) OS=Homo sapiens OX=9606 GN=ACTN1 PE=2 SV=1	93	10.2	5.69
Q13535	Serine/threonine-protein kinase ATR OS=Homo sapiens OX=9606 GN=ATR PE=1 SV=3	10	301.2	7.43
A0A024R3E4	Yes-associated protein 1, 65kDa, isoform CRA_b OS=Homo sapiens OX=9606 GN=YAP1 PE=4 SV=1	30	48.7	5.11
Q92538	Golgi-specific brefeldin A-resistance guanine nucleotide exchange factor 1 OS=Homo sapiens OX=9606 GN=GBF1 PE=1 SV=2	14	206.3	5.73
P38606	V-type proton ATPase catalytic subunit A OS=Homo sapiens OX=9606 GN=ATP6V1A PE=1 SV=2	25	68.3	5.52
B4DUQ1	Heterogeneous nuclear ribonucleoprotein K OS=Homo sapiens OX=9606 PE=2 SV=1	33	48.5	5.92
Q86UY0	TXNDC5 protein OS=Homo sapiens OX=9606 GN=TXNDC5 PE=1 SV=1	49	40.3	5.83
P22059	Oxysterol-binding protein 1 OS=Homo sapiens OX=9606 GN=OSBP PE=1 SV=1	21	89.4	7.3
A0A140VK27	Leukotriene A(4) hydrolase OS=Homo sapiens OX=9606 PE=2 SV=1	33	69.2	6.18
O14727	Apoptotic protease-activating factor 1 OS=Homo sapiens OX=9606 GN=APAF1 PE=1 SV=2	16	141.7	6.4
Q86TB9	Protein PAT1 homolog 1 OS=Homo sapiens OX=9606 GN=PATL1 PE=1 SV=2	21	86.8	6.67
A0A2R8YEK8	Ceramide transfer protein OS=Homo sapiens OX=9606 GN=CERT1 PE=1 SV=1	33	64.3	5.34
A0A0J9YYL3	60 kDa poly(U)-binding-splicing factor (Fragment) OS=Homo sapiens OX=9606 GN=PUF60 PE=1 SV=1	33	54.6	5.34
P55081	Microfibrillar-associated protein 1 OS=Homo sapiens OX=9606 GN=MFAP1 PE=1 SV=2	26	51.9	4.98
A0A087WVP4	Smoothelin OS=Homo sapiens OX=9606 GN=SMTN PE=1 SV=1	21	104.8	8.73
Q9P0L2	Serine/threonine-protein kinase MARK1 OS=Homo sapiens OX=9606 GN=MARK1 PE=1 SV=2	24	88.9	9.36
Q8N0W3	L-fucose kinase OS=Homo sapiens OX=9606 GN=FCSK PE=1 SV=2	18	117.5	6.25
B7Z5T9	Calpain inhibitor OS=Homo sapiens OX=9606 PE=2 SV=1	27	70.2	5.03
P42356	Phosphatidylinositol 4-kinase alpha OS=Homo sapiens OX=9606 GN=PI4KA PE=1 SV=4	9	236.7	7.06
Q8NC60	Nitric oxide-associated protein 1 OS=Homo sapiens OX=9606 GN=NOA1 PE=1 SV=2	33	78.4	8.66
A0A024RB23	Diacylglycerol kinase OS=Homo sapiens OX=9606 GN=DGKA PE=3 SV=1	26	82.6	6.73
A0A494C1T9	Protein FAM83H OS=Homo sapiens OX=9606 GN=FAM83H PE=1 SV=1	15	149	6.71
O00534	von Willebrand factor A domain-containing protein 5A OS=Homo sapiens OX=9606 GN=VWA5A PE=1 SV=2	27	86.4	6.58
P61764	Syntaxin-binding protein 1 OS=Homo sapiens OX=9606 GN=STXBP1 PE=1 SV=1	30	67.5	6.96
Q5STP9	Retinoid X nuclear receptor beta OS=Homo sapiens OX=9606 GN=RXRB PE=2 SV=1	29	56.9	8.18
A8K7F6	RNA helicase OS=Homo sapiens OX=9606 PE=2 SV=1	36	46.1	5.48
A0A024R2I7	RING-type E3 ubiquitin transferase RAD18 OS=Homo sapiens OX=9606 GN=RAD18 PE=3 SV=1	36	56.2	7.42
A0A172Q398	CUB domain-containing protein 1 (Fragment) OS=Homo sapiens OX=9606 GN=CDCP1 PE=2 SV=1	29	71.6	8.15
Q86VS8	Protein Hook homolog 3 OS=Homo sapiens OX=9606 GN=HOOK3 PE=1 SV=2	27	83.1	5.17
Q96ST3	Paired amphipathic helix protein Sin3a OS=Homo sapiens OX=9606 GN=SIN3A PE=1 SV=2	15	145.1	7.25
A0A7P0TA35	Protein disulfide-isomerase OS=Homo sapiens OX=9606 GN=P4HB PE=4 SV=1	31	61	5.01
P36578	60S ribosomal protein L4 OS=Homo sapiens OX=9606 GN=RPL4 PE=1 SV=5	36	47.7	11.06
Q13131	5'-AMP-activated protein kinase catalytic subunit alpha-1 OS=Homo sapiens OX=9606 GN=PRKAA1 PE=1 SV=4	33	64	8.12
Q6IBR2	Phenylalanine--tRNA ligase OS=Homo sapiens OX=9606 GN=FARSLA PE=2 SV=1	29	57.5	7.8
Q8IXI1	Mitochondrial Rho GTPase 2 OS=Homo sapiens OX=9606 GN=RHOT2 PE=1 SV=2	33	68.1	5.86
B7ZKM6	Uveal autoantigen with coiled-coil domains and ankyrin repeats OS=Homo sapiens OX=9606 GN=UACA PE=2 SV=1	14	162.5	7.03
I3VM53	F-box and leucine-rich repeat protein 11, isoform CRA_a OS=Homo sapiens OX=9606 GN=KDM2A PE=2 SV=1	15	132.7	7.58
B3KP18	cDNA FLJ30946 fis, clone FEBRA2007622, highly similar to RAD50-interacting protein 1 OS=Homo sapiens OX=9606 PE=2 SV=1	17	90.5	5.45
A0A6Q8PFL5	E3 ubiquitin-protein ligase LRSAM1 OS=Homo sapiens OX=9606 GN=LRSAM1 PE=1 SV=1	25	75.5	6.05
Q8IY22	C-Maf-inducing protein OS=Homo sapiens OX=9606 GN=CMIP PE=1 SV=3	28	86.3	6.7
Q9H857	5'-nucleotidase domain-containing protein 2 OS=Homo sapiens OX=9606 GN=NT5DC2 PE=1 SV=1	34	60.7	6.77
Q8TF42	Ubiquitin-associated and SH3 domain-containing protein B OS=Homo sapiens OX=9606 GN=UBASH3B PE=1 SV=2	28	72.6	6.93
B4E2B5	MICOS complex subunit MIC60 OS=Homo sapiens OX=9606 PE=2 SV=1	39	43.2	9.2
Q9NTJ3	Structural maintenance of chromosomes protein 4 OS=Homo sapiens OX=9606 GN=SMC4 PE=1 SV=2	15	147.1	6.79
A0A024R9J0	RAD21 homolog (S. pombe), isoform CRA_a OS=Homo sapiens OX=9606 GN=RAD21 PE=3 SV=1	26	71.6	4.65
A0A024R781	CCR4-NOT transcription complex, subunit 4, isoform CRA_b OS=Homo sapiens OX=9606 GN=CNOT4 PE=4 SV=1	28	70.7	7.14
P22223	Cadherin-3 OS=Homo sapiens OX=9606 GN=CDH3 PE=1 SV=2	21	91.4	4.75
A0A024R0J1	Non-specific serine/threonine protein kinase OS=Homo sapiens OX=9606 GN=PAK4 PE=4 SV=1	31	64	9.73
Q9P2N5	RNA-binding protein 27 OS=Homo sapiens OX=9606 GN=RBM27 PE=1 SV=2	17	118.6	9.19
B7Z475	cDNA FLJ55712, highly similar to F-box-like/WD repeat protein TBL1XR1 OS=Homo sapiens OX=9606 PE=2 SV=1	40	40.7	6.83
B3KPV5	cDNA FLJ32300 fis, clone PROST2002227, highly similar to U3 small nucleolar ribonucleoprotein protein MPP10 (Fragment) OS=Homo sapiens OX=9606 PE=2 SV=1	29	76.3	4.77
P26232	Catenin alpha-2 OS=Homo sapiens OX=9606 GN=CTNNA2 PE=1 SV=5	15	105.2	5.71
O95831	Apoptosis-inducing factor 1, mitochondrial OS=Homo sapiens OX=9606 GN=AIFM1 PE=1 SV=1	29	66.9	8.95
B7Z6P1	cDNA FLJ53662, highly similar to Actin, alpha skeletal muscle OS=Homo sapiens OX=9606 PE=2 SV=1	30	38.6	5.38
Q2NKX8	DNA excision repair protein ERCC-6-like OS=Homo sapiens OX=9606 GN=ERCC6L PE=1 SV=1	16	141	5.31
P53814	Smoothelin OS=Homo sapiens OX=9606 GN=SMTN PE=1 SV=7	23	99	9.07
B3KQ45	MAGUK p55 subfamily member 7 OS=Homo sapiens OX=9606 PE=2 SV=1	32	65.5	7.14
A0A024QZD5	U1 small nuclear ribonucleoprotein 70 kDa OS=Homo sapiens OX=9606 GN=SNRP70 PE=4 SV=1	25	51.5	9.94
B4DWI8	Paraspeckle component 1 OS=Homo sapiens OX=9606 PE=2 SV=1	29	52.5	7.25
E9PHY8	Maestro heat-like repeat-containing protein family member 1 OS=Homo sapiens OX=9606 GN=MROH1 PE=1 SV=1	10	180.2	6.86
Q9ULH7	Myocardin-related transcription factor B OS=Homo sapiens OX=9606 GN=MRTFB PE=1 SV=3	17	118.1	6.28
Q9UKE5	TRAF2 and NCK-interacting protein kinase OS=Homo sapiens OX=9606 GN=TNIK PE=1 SV=1	12	154.8	7.17
Q9ULC5	Long-chain-fatty-acid--CoA ligase 5 OS=Homo sapiens OX=9606 GN=ACSL5 PE=1 SV=1	27	75.9	6.92
O43896	Kinesin-like protein KIF1C OS=Homo sapiens OX=9606 GN=KIF1C PE=1 SV=3	17	122.9	6.9
Q0QEN7	ATP synthase subunit beta (Fragment) OS=Homo sapiens OX=9606 GN=ATP5B PE=2 SV=1	38	48.1	5.07
O94822	E3 ubiquitin-protein ligase listerin OS=Homo sapiens OX=9606 GN=LTN1 PE=1 SV=6	13	200.4	6.25
A0A2P9DU05	Rho-associated protein kinase OS=Homo sapiens OX=9606 GN=ROCK2 PE=2 SV=1	14	160.8	6.02
A0A0U1RQX8	E3 ubiquitin-protein ligase CBL OS=Homo sapiens OX=9606 GN=CBL PE=1 SV=1	25	96.8	6.71
P50748	Kinetochore-associated protein 1 OS=Homo sapiens OX=9606 GN=KNTC1 PE=1 SV=1	8	250.6	5.97
A8KA74	cDNA FLJ76065 OS=Homo sapiens OX=9606 PE=2 SV=1	23	97.6	7.69
Q15742	NGFI-A-binding protein 2 OS=Homo sapiens OX=9606 GN=NAB2 PE=1 SV=1	31	56.6	6.96
P50747	Biotin--protein ligase OS=Homo sapiens OX=9606 GN=HLCS PE=1 SV=1	24	80.7	5.62
A0A024RDA1	Exocyst complex component 1, isoform CRA_a OS=Homo sapiens OX=9606 GN=EXOC1 PE=3 SV=1	19	100.2	6.6
P14735	Insulin-degrading enzyme OS=Homo sapiens OX=9606 GN=IDE PE=1 SV=4	23	117.9	6.61
V9P4H4	Magi1d OS=Homo sapiens OX=9606 PE=2 SV=1	16	144.6	7.68
B7Z5Y8	cDNA FLJ56028, highly similar to Tripartite motif-containing protein 3 OS=Homo sapiens OX=9606 PE=2 SV=1	17	80.5	7.97
Q5MIZ7	Serine/threonine-protein phosphatase 4 regulatory subunit 3B OS=Homo sapiens OX=9606 GN=PPP4R3B PE=1 SV=2	19	97.4	4.96
Q9HCJ3	Ribonucleoprotein PTB-binding 2 OS=Homo sapiens OX=9606 GN=RAVER2 PE=1 SV=2	23	74.3	7.47
P43304	Glycerol-3-phosphate dehydrogenase, mitochondrial OS=Homo sapiens OX=9606 GN=GPD2 PE=1 SV=3	23	80.8	7.69
G3V5X4	Nesprin-2 OS=Homo sapiens OX=9606 GN=SYNE2 PE=1 SV=1	3	787.2	5.45
B4DZN1	cDNA FLJ56624, highly similar to Histone deacetylase 6 OS=Homo sapiens OX=9606 PE=2 SV=1	13	130.3	5.3
B3KPB9	Eukaryotic translation initiation factor 3 subunit L OS=Homo sapiens OX=9606 GN=EIF3L PE=2 SV=1	27	70.9	6.65
Q9Y597	BTB/POZ domain-containing protein KCTD3 OS=Homo sapiens OX=9606 GN=KCTD3 PE=1 SV=2	18	88.9	7.03
Q92558	Wiskott-Aldrich syndrome protein family member 1 OS=Homo sapiens OX=9606 GN=WASF1 PE=1 SV=1	23	61.6	6.46
B7Z8F4	RNA helicase OS=Homo sapiens OX=9606 PE=2 SV=1	12	133.9	7.88
A0A024R9N6	EH-domain containing 4, isoform CRA_a OS=Homo sapiens OX=9606 GN=EHD4 PE=4 SV=1	31	61.1	6.76
Q9BVP2	Guanine nucleotide-binding protein-like 3 OS=Homo sapiens OX=9606 GN=GNL3 PE=1 SV=2	28	62	9.16
A0A7I2YQL3	WD repeat-containing protein 26 (Fragment) OS=Homo sapiens OX=9606 GN=WDR26 PE=1 SV=1	22	65.4	6.32
Q8IXI2	Mitochondrial Rho GTPase 1 OS=Homo sapiens OX=9606 GN=RHOT1 PE=1 SV=2	27	70.7	6.27
Q9NVI7	ATPase family AAA domain-containing protein 3A OS=Homo sapiens OX=9606 GN=ATAD3A PE=1 SV=2	22	71.3	8.98
A0A0S2Z462	ArfGAP with FG repeats 1 isoform 2 (Fragment) OS=Homo sapiens OX=9606 GN=AGFG1 PE=2 SV=1	23	62.6	8.56
Q8N4C8	Misshapen-like kinase 1 OS=Homo sapiens OX=9606 GN=MINK1 PE=1 SV=2	15	149.7	7.85
P38919	Eukaryotic initiation factor 4A-III OS=Homo sapiens OX=9606 GN=EIF4A3 PE=1 SV=4	41	46.8	6.73
A0A7G6J4N4	Ubiquitin carboxyl-terminal hydrolase OS=Homo sapiens OX=9606 PE=2 SV=1	21	87.5	5.27
O60678	Protein arginine N-methyltransferase 3 OS=Homo sapiens OX=9606 GN=PRMT3 PE=1 SV=4	32	59.9	5.35
Q13769	THO complex subunit 5 homolog OS=Homo sapiens OX=9606 GN=THOC5 PE=1 SV=2	28	78.5	6.87
A8K964	Pinin OS=Homo sapiens OX=9606 PE=2 SV=1	16	81.5	7.37
A0A384MTQ5	Terpene cyclase/mutase family member OS=Homo sapiens OX=9606 PE=2 SV=1	30	83.2	6.61
Q07864	DNA polymerase epsilon catalytic subunit A OS=Homo sapiens OX=9606 GN=POLE PE=1 SV=5	7	261.4	6.39
O14640	Segment polarity protein dishevelled homolog DVL-1 OS=Homo sapiens OX=9606 GN=DVL1 PE=1 SV=2	32	75.1	7.81
A0A286YFJ8	Immunoglobulin heavy constant gamma 4 (Fragment) OS=Homo sapiens OX=9606 GN=IGHG4 PE=1 SV=1	20	43.8	6.24
A0A6I8PIT5	Heat shock 70 kDa protein 12A OS=Homo sapiens OX=9606 GN=HSPA12A PE=1 SV=1	31	66.3	8.06
Q8N612	FHF complex subunit HOOK interacting protein 1B OS=Homo sapiens OX=9606 GN=FHIP1B PE=1 SV=3	22	105.5	6.77
Q9BWT3	Poly(A) polymerase gamma OS=Homo sapiens OX=9606 GN=PAPOLG PE=1 SV=2	26	82.8	9.14
A0A024R753	RNA binding motif protein 28 isoform 1 OS=Homo sapiens OX=9606 GN=RBM28 PE=2 SV=1	25	85.7	9.22
A8K5C5	MAGUK p55 subfamily member 5 OS=Homo sapiens OX=9606 PE=2 SV=1	28	77.3	6.07
B5BU99	High glucose-regulated protein 8 OS=Homo sapiens OX=9606 GN=YTHDF2 PE=2 SV=1	16	61.3	9.1
Q93034	Cullin-5 OS=Homo sapiens OX=9606 GN=CUL5 PE=1 SV=4	22	90.9	7.94
B0QYK0	RNA-binding protein EWS OS=Homo sapiens OX=9606 GN=EWSR1 PE=1 SV=1	15	64.9	9.38
G5E9L0	ADP-ribosylation factor GTPase-activating protein 2 OS=Homo sapiens OX=9606 GN=ARFGAP2 PE=1 SV=2	35	53.4	8.5
Q2VPB7	AP-5 complex subunit beta-1 OS=Homo sapiens OX=9606 GN=AP5B1 PE=1 SV=4	21	93.9	5.92
B4DZH7	cDNA FLJ56367 OS=Homo sapiens OX=9606 PE=2 SV=1	34	38.5	9
Q8N201	Integrator complex subunit 1 OS=Homo sapiens OX=9606 GN=INTS1 PE=1 SV=2	8	244.1	6.13
Q7Z739	YTH domain-containing family protein 3 OS=Homo sapiens OX=9606 GN=YTHDF3 PE=1 SV=1	22	63.8	9.04
Q5TB52	3'-phosphoadenosine-5'-phosphosulfate synthase OS=Homo sapiens OX=9606 GN=PAPSS2 PE=2 SV=1	23	69.5	8.03
H3BLV9	SRSF protein kinase 1 (Fragment) OS=Homo sapiens OX=9606 GN=SRPK1 PE=1 SV=1	24	76	6.28
A0A024R681	Numb homolog (Drosophila), isoform CRA_f OS=Homo sapiens OX=9606 GN=NUMB PE=4 SV=1	23	65.9	8.66
A0A024R5X7	ClpX caseinolytic peptidase X homolog (E. coli), isoform CRA_a OS=Homo sapiens OX=9606 GN=CLPX PE=3 SV=1	34	69.2	7.58
Q96B97	SH3 domain-containing kinase-binding protein 1 OS=Homo sapiens OX=9606 GN=SH3KBP1 PE=1 SV=2	28	73.1	6.62
Q96P11	28S rRNA (cytosine-C(5))-methyltransferase OS=Homo sapiens OX=9606 GN=NSUN5 PE=1 SV=2	30	46.7	8.62
O14920	Inhibitor of nuclear factor kappa-B kinase subunit beta OS=Homo sapiens OX=9606 GN=IKBKB PE=1 SV=1	21	86.5	5.78
Q96KG9	N-terminal kinase-like protein OS=Homo sapiens OX=9606 GN=SCYL1 PE=1 SV=1	24	89.6	6.3
P08240	Signal recognition particle receptor subunit alpha OS=Homo sapiens OX=9606 GN=SRPRA PE=1 SV=2	27	69.8	8.95
Q9UBK8	Methionine synthase reductase OS=Homo sapiens OX=9606 GN=MTRR PE=1 SV=4	19	77.6	6.49
Q5T0F9	Coiled-coil and C2 domain-containing protein 1B OS=Homo sapiens OX=9606 GN=CC2D1B PE=1 SV=1	16	94.2	5.26
O14976	Cyclin-G-associated kinase OS=Homo sapiens OX=9606 GN=GAK PE=1 SV=2	9	143.1	5.73
P27816	Microtubule-associated protein 4 OS=Homo sapiens OX=9606 GN=MAP4 PE=1 SV=3	15	120.9	5.43
Q8IWZ8	SURP and G-patch domain-containing protein 1 OS=Homo sapiens OX=9606 GN=SUGP1 PE=1 SV=2	27	72.4	7.61
H0Y4W2	Transformation/transcription domain-associated protein OS=Homo sapiens OX=9606 GN=TRRAP PE=1 SV=2	4	438.6	8.12
Q16706	Alpha-mannosidase 2 OS=Homo sapiens OX=9606 GN=MAN2A1 PE=1 SV=2	14	131.1	7.58
Q9ULJ7	Ankyrin repeat domain-containing protein 50 OS=Homo sapiens OX=9606 GN=ANKRD50 PE=1 SV=4	12	155.8	6.6
A8K2P3	cDNA FLJ77041, highly similar to Homo sapiens RAS protein activator like 2 (RASAL2), transcript variant 1, mRNA (Fragment) OS=Homo sapiens OX=9606 PE=2 SV=1	20	110.9	8.06
Q13057	Bifunctional coenzyme A synthase OS=Homo sapiens OX=9606 GN=COASY PE=1 SV=4	32	62.3	6.99
Q9BW92	Threonine--tRNA ligase, mitochondrial OS=Homo sapiens OX=9606 GN=TARS2 PE=1 SV=1	27	81	7.3
Q5VZK9	F-actin-uncapping protein LRRC16A OS=Homo sapiens OX=9606 GN=CARMIL1 PE=1 SV=1	13	151.5	7.85
B9EGI2	Myosin phosphatase Rho interacting protein OS=Homo sapiens OX=9606 GN=MPRIP PE=2 SV=1	17	118	6.39
Q9HCL2	Glycerol-3-phosphate acyltransferase 1, mitochondrial OS=Homo sapiens OX=9606 GN=GPAM PE=1 SV=3	23	93.7	7.74
Q9Y4C4	Malignant fibrous histiocytoma-amplified sequence 1 OS=Homo sapiens OX=9606 GN=MFHAS1 PE=1 SV=2	20	116.9	7.88
Q86TT2	Full-length cDNA clone CS0DI019YF20 of Placenta of Homo sapiens (human) (Fragment) OS=Homo sapiens OX=9606 PE=2 SV=1	23	39.1	7.65
P51116	Fragile X mental retardation syndrome-related protein 2 OS=Homo sapiens OX=9606 GN=FXR2 PE=1 SV=2	21	74.2	6.23
Q9BTA9	WW domain-containing adapter protein with coiled-coil OS=Homo sapiens OX=9606 GN=WAC PE=1 SV=3	37	70.7	9.45
L7RRS6	V-raf-1 murine leukemia viral oncogene homolog 1 OS=Homo sapiens OX=9606 GN=RAF1 PE=2 SV=1	28	73	9.2
D9ZGF8	Rho-associated protein kinase OS=Homo sapiens OX=9606 GN=ROCK1 PE=3 SV=1	13	158.1	5.94
C9JA93	TBC1 domain family member 15 (Fragment) OS=Homo sapiens OX=9606 GN=TBC1D15 PE=1 SV=1	56	32.1	8.84
P63241	Eukaryotic translation initiation factor 5A-1 OS=Homo sapiens OX=9606 GN=EIF5A PE=1 SV=2	56	16.8	5.24
P13807	Glycogen [starch] synthase, muscle OS=Homo sapiens OX=9606 GN=GYS1 PE=1 SV=2	28	83.7	6.18
Q86TV6	Tetratricopeptide repeat protein 7B OS=Homo sapiens OX=9606 GN=TTC7B PE=1 SV=3	18	94.1	6.89
A0A024R728	HGF/SF receptor OS=Homo sapiens OX=9606 GN=MET PE=4 SV=1	13	157.6	7.33
A6ND36	Protein FAM83G OS=Homo sapiens OX=9606 GN=FAM83G PE=1 SV=2	22	90.8	6.39
O75909	Cyclin-K OS=Homo sapiens OX=9606 GN=CCNK PE=1 SV=2	21	64.2	8.41
P35251	Replication factor C subunit 1 OS=Homo sapiens OX=9606 GN=RFC1 PE=1 SV=4	17	128.2	9.36
Q2TTR7	Receptor protein-tyrosine kinase OS=Homo sapiens OX=9606 PE=2 SV=1	12	134.2	6.68
Q9NZC9	SWI/SNF-related matrix-associated actin-dependent regulator of chromatin subfamily A-like protein 1 OS=Homo sapiens OX=9606 GN=SMARCAL1 PE=1 SV=1	17	105.9	9.06
O60244	Mediator of RNA polymerase II transcription subunit 14 OS=Homo sapiens OX=9606 GN=MED14 PE=1 SV=2	15	160.5	8.73
P23378	Glycine dehydrogenase (decarboxylating), mitochondrial OS=Homo sapiens OX=9606 GN=GLDC PE=1 SV=2	20	112.7	7.11
F8W9E7	Engulfment and cell motility protein 3 OS=Homo sapiens OX=9606 GN=ELMO3 PE=1 SV=2	22	79.6	6.2
Q9H7D0	Dedicator of cytokinesis protein 5 OS=Homo sapiens OX=9606 GN=DOCK5 PE=1 SV=3	10	215.2	7.96
Q9NZB2	Constitutive coactivator of PPAR-gamma-like protein 1 OS=Homo sapiens OX=9606 GN=FAM120A PE=1 SV=2	15	121.8	8.88
Q96JM3	Chromosome alignment-maintaining phosphoprotein 1 OS=Homo sapiens OX=9606 GN=CHAMP1 PE=1 SV=2	14	89	8.44
O00425	Insulin-like growth factor 2 mRNA-binding protein 3 OS=Homo sapiens OX=9606 GN=IGF2BP3 PE=1 SV=2	29	63.7	8.87
A0A096LP25	AP2-associated protein kinase 1 OS=Homo sapiens OX=9606 GN=AAK1 PE=1 SV=2	16	125.8	7.59
Q9NZM1	Myoferlin OS=Homo sapiens OX=9606 GN=MYOF PE=1 SV=1	8	234.6	6.18
A0A384MTT2	Phosphoenolpyruvate carboxykinase (GTP) OS=Homo sapiens OX=9606 GN=PCK2 PE=2 SV=1	27	70.7	7.62
B2R928	Non-specific serine/threonine protein kinase OS=Homo sapiens OX=9606 PE=2 SV=1	19	95	7.74
P31153	S-adenosylmethionine synthase isoform type-2 OS=Homo sapiens OX=9606 GN=MAT2A PE=1 SV=1	34	43.6	6.48
Q9H1I8	Activating signal cointegrator 1 complex subunit 2 OS=Homo sapiens OX=9606 GN=ASCC2 PE=1 SV=3	22	86.3	5.16
Q96JM7	Lethal(3)malignant brain tumor-like protein 3 OS=Homo sapiens OX=9606 GN=L3MBTL3 PE=1 SV=2	19	88.3	6.46
G5EA36	Cell division cycle 27, isoform CRA_c OS=Homo sapiens OX=9606 GN=CDC27 PE=1 SV=1	20	91.7	7.12
Q969X6	U3 small nucleolar RNA-associated protein 4 homolog OS=Homo sapiens OX=9606 GN=UTP4 PE=1 SV=1	26	76.8	8.85
I3L352	RNA helicase (Fragment) OS=Homo sapiens OX=9606 GN=DDX19A PE=1 SV=1	32	44.9	8.07
Q96L92	Sorting nexin-27 OS=Homo sapiens OX=9606 GN=SNX27 PE=1 SV=2	26	61.2	6.49
Q9UBU9	Nuclear RNA export factor 1 OS=Homo sapiens OX=9606 GN=NXF1 PE=1 SV=1	25	70.1	8.51
Q7Z4H7	HAUS augmin-like complex subunit 6 OS=Homo sapiens OX=9606 GN=HAUS6 PE=1 SV=2	26	108.6	6.47
B4DW97	RNA helicase OS=Homo sapiens OX=9606 PE=2 SV=1	24	80	8.85
B2RA06	cDNA, FLJ94643, highly similar to Homo sapiens neutral sphingomyelinase (N-SMase) activation associated factor (NSMAF), mRNA OS=Homo sapiens OX=9606 PE=2 SV=1	20	104.3	6.23
A0A2X0U2N0	RALBP1 (Fragment) OS=Homo sapiens OX=9606 GN=RALBP1 PE=4 SV=1	23	76.2	5.88
Q8TDB6	E3 ubiquitin-protein ligase DTX3L OS=Homo sapiens OX=9606 GN=DTX3L PE=1 SV=1	24	83.5	8.06
A0A024R5K1	Coronin OS=Homo sapiens OX=9606 GN=CORO1B PE=3 SV=1	32	54.2	5.88
Q15654	Thyroid receptor-interacting protein 6 OS=Homo sapiens OX=9606 GN=TRIP6 PE=1 SV=3	23	50.3	7.37
P10398	Serine/threonine-protein kinase A-Raf OS=Homo sapiens OX=9606 GN=ARAF PE=1 SV=2	24	67.5	9.01
O60832	H/ACA ribonucleoprotein complex subunit DKC1 OS=Homo sapiens OX=9606 GN=DKC1 PE=1 SV=3	22	57.6	9.42
B4DT65	cDNA FLJ58619, highly similar to YTH domain protein 1 OS=Homo sapiens OX=9606 PE=2 SV=1	17	55.3	9.01
Q6P2H3	Centrosomal protein of 85 kDa OS=Homo sapiens OX=9606 GN=CEP85 PE=1 SV=1	17	85.6	6
H0YME5	Non-specific serine/threonine protein kinase (Fragment) OS=Homo sapiens OX=9606 GN=EIF2AK4 PE=1 SV=1	14	161.1	6.54
Q96HP0	Dedicator of cytokinesis protein 6 OS=Homo sapiens OX=9606 GN=DOCK6 PE=1 SV=3	11	229.4	6.74
O15240	Neurosecretory protein VGF OS=Homo sapiens OX=9606 GN=VGF PE=1 SV=2	20	67.2	4.78
Q86TI0	TBC1 domain family member 1 OS=Homo sapiens OX=9606 GN=TBC1D1 PE=1 SV=2	15	133	6.96
B3KS41	Spermatogenesis-associated protein 20 OS=Homo sapiens OX=9606 PE=2 SV=1	26	83.4	6.67
O15164	Transcription intermediary factor 1-alpha OS=Homo sapiens OX=9606 GN=TRIM24 PE=1 SV=3	14	116.8	7.11
A0A024RB55	Centaurin, gamma 1, isoform CRA_b OS=Homo sapiens OX=9606 GN=CENTG1 PE=3 SV=1	23	90.5	8.78
A0A3B3IS71	Retinoblastoma-associated protein OS=Homo sapiens OX=9606 GN=RB1 PE=1 SV=1	19	105.4	7.61
O75717	WD repeat and HMG-box DNA-binding protein 1 OS=Homo sapiens OX=9606 GN=WDHD1 PE=1 SV=1	17	125.9	5.62
Q12792	Twinfilin-1 OS=Homo sapiens OX=9606 GN=TWF1 PE=1 SV=3	36	40.3	6.96
Q14244	Ensconsin OS=Homo sapiens OX=9606 GN=MAP7 PE=1 SV=1	17	84	9.61
Q6UN15	Pre-mRNA 3'-end-processing factor FIP1 OS=Homo sapiens OX=9606 GN=FIP1L1 PE=1 SV=1	22	66.5	5.59
P52292	Importin subunit alpha-1 OS=Homo sapiens OX=9606 GN=KPNA2 PE=1 SV=1	27	57.8	5.4
Q8WVC0	RNA polymerase-associated protein LEO1 OS=Homo sapiens OX=9606 GN=LEO1 PE=1 SV=1	16	75.4	4.51
Q13033	Striatin-3 OS=Homo sapiens OX=9606 GN=STRN3 PE=1 SV=3	14	87.2	5.36
Q9BZF3	Oxysterol-binding protein-related protein 6 OS=Homo sapiens OX=9606 GN=OSBPL6 PE=1 SV=1	12	106.2	6.93
Q8TEL6	Short transient receptor potential channel 4-associated protein OS=Homo sapiens OX=9606 GN=TRPC4AP PE=1 SV=2	17	90.8	7.61
Q9H8Y5	Ankyrin repeat and zinc finger domain-containing protein 1 OS=Homo sapiens OX=9606 GN=ANKZF1 PE=1 SV=1	17	80.9	8.41
Q04695	Keratin, type I cytoskeletal 17 OS=Homo sapiens OX=9606 GN=KRT17 PE=1 SV=2	22	48.1	5.02
Q9Y4C1	Lysine-specific demethylase 3A OS=Homo sapiens OX=9606 GN=KDM3A PE=1 SV=4	12	147.2	8.07
A0A024R136	Rac GTPase activating protein 1, isoform CRA_a OS=Homo sapiens OX=9606 GN=RACGAP1 PE=4 SV=1	23	71	8.88
B3KMQ6	cDNA FLJ12172 fis, clone MAMMA1000684, highly similar to Opioid growth factor receptor OS=Homo sapiens OX=9606 PE=2 SV=1	19	73.3	4.84
P61221	ATP-binding cassette sub-family E member 1 OS=Homo sapiens OX=9606 GN=ABCE1 PE=1 SV=1	26	67.3	8.34
A0A024R120	Transcription factor CP2, isoform CRA_a OS=Homo sapiens OX=9606 GN=TFCP2 PE=3 SV=1	21	57.2	5.8
B4DHJ4	cDNA FLJ57931, highly similar to MORC family CW-type zinc finger 3 OS=Homo sapiens OX=9606 PE=2 SV=1	17	99.2	5.57
A1A4E9	Keratin 13 OS=Homo sapiens OX=9606 GN=KRT13 PE=2 SV=1	19	49.6	4.96
B4DLE6	cDNA FLJ52559, highly similar to Homo sapiens unc-45 homolog A (UNC45A), transcript variant 3, mRNA OS=Homo sapiens OX=9606 PE=2 SV=1	38	35.6	6.9
Q8N556	Actin filament-associated protein 1 OS=Homo sapiens OX=9606 GN=AFAP1 PE=1 SV=2	15	80.7	8.68
Q8IZ83	Aldehyde dehydrogenase family 16 member A1 OS=Homo sapiens OX=9606 GN=ALDH16A1 PE=1 SV=2	16	85.1	6.79
Q86UA1	Pre-mRNA-processing factor 39 OS=Homo sapiens OX=9606 GN=PRPF39 PE=1 SV=3	21	78.4	5.4
Q8N5C6	S1 RNA-binding domain-containing protein 1 OS=Homo sapiens OX=9606 GN=SRBD1 PE=1 SV=2	19	111.7	8.72
Q05CN4	PPFIBP1 protein (Fragment) OS=Homo sapiens OX=9606 GN=PPFIBP1 PE=2 SV=1	33	33.6	4.94
Q86YZ3	Hornerin OS=Homo sapiens OX=9606 GN=HRNR PE=1 SV=2	12	282.2	10.04
B3KUY5	Conserved oligomeric Golgi complex subunit 1 OS=Homo sapiens OX=9606 PE=2 SV=1	19	99.2	7.06
Q14684	Ribosomal RNA processing protein 1 homolog B OS=Homo sapiens OX=9606 GN=RRP1B PE=1 SV=3	20	84.4	9.76
Q5T321	Neurobeachin OS=Homo sapiens OX=9606 GN=NBEA PE=1 SV=2	4	330.2	6.19
Q9H4L7	SWI/SNF-related matrix-associated actin-dependent regulator of chromatin subfamily A containing DEAD/H box 1 OS=Homo sapiens OX=9606 GN=SMARCAD1 PE=1 SV=2	12	117.3	5.55
Q6R327	Rapamycin-insensitive companion of mTOR OS=Homo sapiens OX=9606 GN=RICTOR PE=1 SV=1	13	192.1	7.47
P46063	ATP-dependent DNA helicase Q1 OS=Homo sapiens OX=9606 GN=RECQL PE=1 SV=3	22	73.4	7.88
Q9Y5Q9	General transcription factor 3C polypeptide 3 OS=Homo sapiens OX=9606 GN=GTF3C3 PE=1 SV=1	17	101.2	5.07
H0Y9S9	Inositol hexakisphosphate and diphosphoinositol-pentakisphosphate kinase (Fragment) OS=Homo sapiens OX=9606 GN=PPIP5K2 PE=1 SV=1	38	45	9.19
Q7LBC6	Lysine-specific demethylase 3B OS=Homo sapiens OX=9606 GN=KDM3B PE=1 SV=2	11	191.5	7.18
A0A087WUE4	Leukocyte receptor cluster member 8 OS=Homo sapiens OX=9606 GN=LENG8 PE=1 SV=1	13	95.5	9.32
A0A024RBL8	F-box protein 21, isoform CRA_c OS=Homo sapiens OX=9606 GN=FBXO21 PE=4 SV=1	25	71.4	6.01
Q8N442	Translation factor GUF1, mitochondrial OS=Homo sapiens OX=9606 GN=GUF1 PE=2 SV=1	22	74.3	8.59
P51532	Transcription activator BRG1 OS=Homo sapiens OX=9606 GN=SMARCA4 PE=1 SV=2	8	184.5	7.88
Q00341	Vigilin OS=Homo sapiens OX=9606 GN=HDLBP PE=1 SV=2	14	141.4	6.87
H0YDB2	Stromal interaction molecule 1 OS=Homo sapiens OX=9606 GN=STIM1 PE=1 SV=2	18	80.9	6.71
A0A024RBL4	RNA binding motif protein 19, isoform CRA_a OS=Homo sapiens OX=9606 GN=RBM19 PE=4 SV=1	20	86.8	6.27
X5D2U3	Non-specific serine/threonine protein kinase (Fragment) OS=Homo sapiens OX=9606 GN=STK39 PE=2 SV=1	29	57.9	6.29
Q6PI48	Aspartate--tRNA ligase, mitochondrial OS=Homo sapiens OX=9606 GN=DARS2 PE=1 SV=1	22	73.5	8.02
P38935	DNA-binding protein SMUBP-2 OS=Homo sapiens OX=9606 GN=IGHMBP2 PE=1 SV=3	19	109.1	8.97
Q53GS8	Wolf-Hirschhorn syndrome candidate 2 protein variant (Fragment) OS=Homo sapiens OX=9606 PE=2 SV=1	19	57.3	8.92
Q58FF6	Putative heat shock protein HSP 90-beta 4 OS=Homo sapiens OX=9606 GN=HSP90AB4P PE=5 SV=1	14	58.2	4.73
A8K0J3	cDNA FLJ76732, highly similar to Homo sapiens TAO kinase 3 (TAOK3), mRNA OS=Homo sapiens OX=9606 PE=2 SV=1	19	105.3	7.37
Q86YR5	G-protein-signaling modulator 1 OS=Homo sapiens OX=9606 GN=GPSM1 PE=1 SV=2	22	74.5	6.54
A0A024R9D2	Metadherin, isoform CRA_a OS=Homo sapiens OX=9606 GN=MTDH PE=4 SV=1	30	63.8	9.32
A8K7Q1	Nucleobindin-1 OS=Homo sapiens OX=9606 PE=2 SV=1	24	53.9	5.25
Q9Y6W3	Calpain-7 OS=Homo sapiens OX=9606 GN=CAPN7 PE=1 SV=1	30	92.6	7.65
B1ALW7	Component of oligomeric Golgi complex 2 OS=Homo sapiens OX=9606 GN=COG2 PE=2 SV=1	18	83.2	6.62
J3KS54	Protein flightless-1 homolog OS=Homo sapiens OX=9606 GN=FLII PE=1 SV=1	23	78	6.32
Q9UPM8	AP-4 complex subunit epsilon-1 OS=Homo sapiens OX=9606 GN=AP4E1 PE=1 SV=2	19	127.2	5.99
Q15758	Neutral amino acid transporter B(0) OS=Homo sapiens OX=9606 GN=SLC1A5 PE=1 SV=2	20	56.6	5.48
F2Z357	Rap1 GTPase-activating protein 1 OS=Homo sapiens OX=9606 GN=RAP1GAP PE=1 SV=1	23	66.9	6.11
Q92769	Histone deacetylase 2 OS=Homo sapiens OX=9606 GN=HDAC2 PE=1 SV=2	26	55.3	5.91
B4DNB9	AP-2 complex subunit mu OS=Homo sapiens OX=9606 PE=2 SV=1	35	52.3	9.5
Q709F0	Acyl-CoA dehydrogenase family member 11 OS=Homo sapiens OX=9606 GN=ACAD11 PE=1 SV=3	17	87.2	8.02
O75928	E3 SUMO-protein ligase PIAS2 OS=Homo sapiens OX=9606 GN=PIAS2 PE=1 SV=3	26	68.2	7.52
Q8NE01	Metal transporter CNNM3 OS=Homo sapiens OX=9606 GN=CNNM3 PE=1 SV=1	22	76.1	6.09
A0A3B3ISP1	Ankyrin repeat and SAM domain-containing protein 1A OS=Homo sapiens OX=9606 GN=ANKS1A PE=1 SV=1	14	129.8	6.52
B9EK47	HEAT repeat containing 5B OS=Homo sapiens OX=9606 GN=HEATR5B PE=2 SV=1	8	224.1	7.18
H0Y6H0	Lysine-specific histone demethylase 1B OS=Homo sapiens OX=9606 GN=KDM1B PE=1 SV=2	28	92.2	7.87
A0A0A0MRM9	Nucleolar and coiled-body phosphoprotein 1 (Fragment) OS=Homo sapiens OX=9606 GN=NOLC1 PE=1 SV=1	17	74.6	9.47
P23469	Receptor-type tyrosine-protein phosphatase epsilon OS=Homo sapiens OX=9606 GN=PTPRE PE=1 SV=1	17	80.6	7.02
Q9Y4W6	AFG3-like protein 2 OS=Homo sapiens OX=9606 GN=AFG3L2 PE=1 SV=2	16	88.5	8.66
O14744	Protein arginine N-methyltransferase 5 OS=Homo sapiens OX=9606 GN=PRMT5 PE=1 SV=4	23	72.6	6.29
O95793	Double-stranded RNA-binding protein Staufen homolog 1 OS=Homo sapiens OX=9606 GN=STAU1 PE=1 SV=2	23	63.1	9.44
A0A5F9ZHW5	Ataxin-2 OS=Homo sapiens OX=9606 GN=ATXN2 PE=1 SV=1	11	127.1	8.97
Q7Z6J0	E3 ubiquitin-protein ligase SH3RF1 OS=Homo sapiens OX=9606 GN=SH3RF1 PE=1 SV=2	17	93.1	8.54
P12931	Proto-oncogene tyrosine-protein kinase Src OS=Homo sapiens OX=9606 GN=SRC PE=1 SV=3	23	59.8	7.42
Q9NXV6	CDKN2A-interacting protein OS=Homo sapiens OX=9606 GN=CDKN2AIP PE=1 SV=3	30	61.1	9.01
A0A5F9ZHM4	L-lactate dehydrogenase OS=Homo sapiens OX=9606 GN=LDHB PE=1 SV=1	42	37.4	6.25
Q6NUL1	Exostoses (Multiple) 2 OS=Homo sapiens OX=9606 GN=EXT2 PE=2 SV=1	18	82.1	6.55
P15056	Serine/threonine-protein kinase B-raf OS=Homo sapiens OX=9606 GN=BRAF PE=1 SV=4	19	84.4	7.53
B3KU05	Trafficking protein particle complex subunit 11 OS=Homo sapiens OX=9606 PE=2 SV=1	17	128.8	7.27
A0A7P0T9A7	Adenylosuccinate lyase OS=Homo sapiens OX=9606 GN=ADSL PE=4 SV=1	32	57.9	7.43
B2RAF9	Suppressor of tumorigenicity 14 protein homolog OS=Homo sapiens OX=9606 PE=2 SV=1	15	94.7	6.52
B4DLJ5	cDNA FLJ55716, highly similar to Desmocollin-2 OS=Homo sapiens OX=9606 PE=2 SV=1	13	101	5.27
Q96JB2	Conserved oligomeric Golgi complex subunit 3 OS=Homo sapiens OX=9606 GN=COG3 PE=1 SV=3	17	94	5.57
Q8IY33	MICAL-like protein 2 OS=Homo sapiens OX=9606 GN=MICALL2 PE=1 SV=1	19	97.4	9.57
B4DYZ7	DNA polymerase delta subunit 3 OS=Homo sapiens OX=9606 PE=2 SV=1	28	51.3	9.38
A0A024R087	HCG36935, isoform CRA_b OS=Homo sapiens OX=9606 GN=hCG_36935 PE=4 SV=1	24	67.3	5.1
Q6IEH8	Nipped-B protein OS=Homo sapiens OX=9606 GN=NIPBL PE=2 SV=1	6	315.9	7.91
Q0JRZ9	F-BAR domain only protein 2 OS=Homo sapiens OX=9606 GN=FCHO2 PE=1 SV=2	24	88.9	6.86
Q9NVU7	Protein SDA1 homolog OS=Homo sapiens OX=9606 GN=SDAD1 PE=1 SV=3	21	79.8	9.25
P49916	DNA ligase 3 OS=Homo sapiens OX=9606 GN=LIG3 PE=1 SV=2	15	112.8	9.01
A0A0S2Z5K8	Spermatid perinuclear RNA-binding protein (Fragment) OS=Homo sapiens OX=9606 GN=STRBP PE=1 SV=1	10	72.1	8.73
Q5T081	CHC1 protein (Fragment) OS=Homo sapiens OX=9606 GN=RCC1 PE=2 SV=1	24	44.9	7.52
A8K732	cDNA FLJ78771, highly similar to Homo sapiens discs, large homolog 7 (Drosophila), mRNA OS=Homo sapiens OX=9606 PE=2 SV=1	17	95.1	9
Q63ZY3	KN motif and ankyrin repeat domain-containing protein 2 OS=Homo sapiens OX=9606 GN=KANK2 PE=1 SV=1	20	91.1	5.63
Q9UJM3	ERBB receptor feedback inhibitor 1 OS=Homo sapiens OX=9606 GN=ERRFI1 PE=1 SV=1	22	50.5	8.1
B4DFL1	Dihydrolipoyl dehydrogenase OS=Homo sapiens OX=9606 PE=2 SV=1	21	48.9	7.49
Q9Y4C8	Probable RNA-binding protein 19 OS=Homo sapiens OX=9606 GN=RBM19 PE=1 SV=3	16	107.3	6.54
Q15365	Poly(rC)-binding protein 1 OS=Homo sapiens OX=9606 GN=PCBP1 PE=1 SV=2	35	37.5	7.09
Q496Y1	C10orf118 protein (Fragment) OS=Homo sapiens OX=9606 GN=C10orf118 PE=2 SV=1	13	115.8	6.87
Q96KA5	Cleft lip and palate transmembrane protein 1-like protein OS=Homo sapiens OX=9606 GN=CLPTM1L PE=1 SV=1	20	62.2	8.56
Q5U0C9	Mitogen-activated protein kinase kinase kinase 7 OS=Homo sapiens OX=9606 PE=2 SV=1	18	67.2	7.11
Q9H1K0	Rabenosyn-5 OS=Homo sapiens OX=9606 GN=RBSN PE=1 SV=2	18	88.8	5.5
Q676U5	Autophagy-related protein 16-1 OS=Homo sapiens OX=9606 GN=ATG16L1 PE=1 SV=2	30	68.2	6.64
Q9Y5J1	U3 small nucleolar RNA-associated protein 18 homolog OS=Homo sapiens OX=9606 GN=UTP18 PE=1 SV=3	28	62	8.76
P49748	Very long-chain specific acyl-CoA dehydrogenase, mitochondrial OS=Homo sapiens OX=9606 GN=ACADVL PE=1 SV=1	27	70.3	8.75
A0A024R5M9	Nuclear mitotic apparatus protein 1, isoform CRA_a OS=Homo sapiens OX=9606 GN=NUMA1 PE=4 SV=1	7	236.4	5.8
A5YM53	ITGAV protein OS=Homo sapiens OX=9606 GN=ITGAV PE=2 SV=1	18	116	5.74
Q5TDG9	DnaJ homolog subfamily C member 16 OS=Homo sapiens OX=9606 GN=DNAJC16 PE=1 SV=1	27	69.3	7.15
Q8IWZ3	Ankyrin repeat and KH domain-containing protein 1 OS=Homo sapiens OX=9606 GN=ANKHD1 PE=1 SV=1	6	269.3	5.73
P19021	Peptidyl-glycine alpha-amidating monooxygenase OS=Homo sapiens OX=9606 GN=PAM PE=1 SV=2	12	108.3	6.42
O75886	Signal transducing adapter molecule 2 OS=Homo sapiens OX=9606 GN=STAM2 PE=1 SV=1	23	58.1	5.07
E9PK52	Band 4.1-like protein 2 OS=Homo sapiens OX=9606 GN=EPB41L2 PE=1 SV=1	15	90.9	5.86
Q15796	Mothers against decapentaplegic homolog 2 OS=Homo sapiens OX=9606 GN=SMAD2 PE=1 SV=1	28	52.3	6.58
Q1RMC9	ERBB2IP protein OS=Homo sapiens OX=9606 GN=ERBB2IP PE=2 SV=1	13	153.4	5.47
O43719	HIV Tat-specific factor 1 OS=Homo sapiens OX=9606 GN=HTATSF1 PE=1 SV=1	22	85.8	4.4
Q15020	Squamous cell carcinoma antigen recognized by T-cells 3 OS=Homo sapiens OX=9606 GN=SART3 PE=1 SV=1	13	109.9	5.57
Q8WUQ7	Cactin OS=Homo sapiens OX=9606 GN=CACTIN PE=1 SV=3	15	88.6	9.14
F5GY05	Constitutive coactivator of peroxisome proliferator-activated receptor gamma OS=Homo sapiens OX=9606 GN=FAM120B PE=1 SV=1	16	106	5.87
P28749	Retinoblastoma-like protein 1 OS=Homo sapiens OX=9606 GN=RBL1 PE=1 SV=3	15	120.8	7.5
P33908	Mannosyl-oligosaccharide 1,2-alpha-mannosidase IA OS=Homo sapiens OX=9606 GN=MAN1A1 PE=1 SV=3	25	72.9	6.47
A0A6Q8PH45	KIF-binding protein OS=Homo sapiens OX=9606 GN=KIFBP PE=1 SV=1	29	69.9	5.68
Q9H2D6	TRIO and F-actin-binding protein OS=Homo sapiens OX=9606 GN=TRIOBP PE=1 SV=3	5	261.2	8.48
B2R791	Pre-mRNA-splicing factor 3 OS=Homo sapiens OX=9606 PE=2 SV=1	22	77.5	9.5
P48380	Transcription factor RFX3 OS=Homo sapiens OX=9606 GN=RFX3 PE=1 SV=2	14	83.5	6
Q9NRF8	CTP synthase 2 OS=Homo sapiens OX=9606 GN=CTPS2 PE=1 SV=1	18	65.6	6.9
A0A087WZG4	Rho guanine nucleotide exchange factor 18 OS=Homo sapiens OX=9606 GN=ARHGEF18 PE=1 SV=3	14	130.7	7.08
A6H8W8	Intersectin 2 OS=Homo sapiens OX=9606 GN=ITSN2 PE=2 SV=1	9	190.2	8.18
Q14203	Dynactin subunit 1 OS=Homo sapiens OX=9606 GN=DCTN1 PE=1 SV=3	10	141.6	5.81
A0A024R411	Origin recognition complex subunit 2 OS=Homo sapiens OX=9606 GN=ORC2L PE=3 SV=1	18	65.9	6.51
B7WPL9	Inositol hexakisphosphate and diphosphoinositol-pentakisphosphate kinase OS=Homo sapiens OX=9606 GN=PPIP5K1 PE=1 SV=1	6	158.9	5.38
I6L9E8	Family with sequence similarity 98, member A OS=Homo sapiens OX=9606 GN=FAM98A PE=2 SV=1	13	55.1	8.88
B7Z9V1	Tyrosine-protein phosphatase non-receptor type OS=Homo sapiens OX=9606 GN=PTPN3 PE=2 SV=1	21	98.8	6.8
Q9NRG9	Aladin OS=Homo sapiens OX=9606 GN=AAAS PE=1 SV=1	28	59.5	7.5
O75864	Protein phosphatase 1 regulatory subunit 37 OS=Homo sapiens OX=9606 GN=PPP1R37 PE=1 SV=4	14	74.7	5.06
Q9P1Y5	Calmodulin-regulated spectrin-associated protein 3 OS=Homo sapiens OX=9606 GN=CAMSAP3 PE=1 SV=2	13	134.7	8.35
Q8NBF2	NHL repeat-containing protein 2 OS=Homo sapiens OX=9606 GN=NHLRC2 PE=1 SV=1	27	79.4	5.55
P02042	Hemoglobin subunit delta OS=Homo sapiens OX=9606 GN=HBD PE=1 SV=2	44	16	8.05
B7Z7P2	cDNA FLJ61633, highly similar to Homo sapiens ubiquitin associated protein 2 (UBAP2), transcript variant 1, mRNA OS=Homo sapiens OX=9606 PE=2 SV=1	18	73	7.2
Q86UU1	Pleckstrin homology-like domain family B member 1 OS=Homo sapiens OX=9606 GN=PHLDB1 PE=1 SV=1	10	151.1	8.63
Q53GS7	Nucleoporin GLE1 OS=Homo sapiens OX=9606 GN=GLE1 PE=1 SV=2	22	79.8	7.43
A0A3B3IUB9	Baculoviral IAP repeat-containing protein 6 (Fragment) OS=Homo sapiens OX=9606 GN=BIRC6 PE=1 SV=1	3	418.9	6.13
P07355	Annexin A2 OS=Homo sapiens OX=9606 GN=ANXA2 PE=1 SV=2	24	38.6	7.75
H7BZW2	Centrosomal protein of 85 kDa (Fragment) OS=Homo sapiens OX=9606 GN=CEP85 PE=1 SV=1	23	50.3	5.55
Q96S59	Ran-binding protein 9 OS=Homo sapiens OX=9606 GN=RANBP9 PE=1 SV=1	17	77.8	6.79
Q9UJX5	Anaphase-promoting complex subunit 4 OS=Homo sapiens OX=9606 GN=ANAPC4 PE=1 SV=2	20	92.1	5.53
Q9Y230	RuvB-like 2 OS=Homo sapiens OX=9606 GN=RUVBL2 PE=1 SV=3	31	51.1	5.64
Q6IA69	Glutamine-dependent NAD(+) synthetase OS=Homo sapiens OX=9606 GN=NADSYN1 PE=1 SV=3	18	79.2	6.44
Q15022	Polycomb protein SUZ12 OS=Homo sapiens OX=9606 GN=SUZ12 PE=1 SV=3	18	83	8.81
Q7Z406	Myosin-14 OS=Homo sapiens OX=9606 GN=MYH14 PE=1 SV=2	7	227.7	5.6
P08729	Keratin, type II cytoskeletal 7 OS=Homo sapiens OX=9606 GN=KRT7 PE=1 SV=5	14	51.4	5.48
A8K330	cDNA FLJ77055, highly similar to Homo sapiens WD repeat domain 75 (WDR75), mRNA (Fragment) OS=Homo sapiens OX=9606 PE=2 SV=1	23	92.2	5.82
C9JW01	Pumilio homolog 2 (Fragment) OS=Homo sapiens OX=9606 GN=PUM2 PE=1 SV=1	29	32	4.82
Q9BVI4	Nucleolar complex protein 4 homolog OS=Homo sapiens OX=9606 GN=NOC4L PE=1 SV=1	26	58.4	7.49
P27540	Aryl hydrocarbon receptor nuclear translocator OS=Homo sapiens OX=9606 GN=ARNT PE=1 SV=1	18	86.6	6.54
B2RCT6	cDNA, FLJ96276, highly similar to Homo sapiens G1 to S phase transition 1 (GSPT1), mRNA OS=Homo sapiens OX=9606 PE=2 SV=1	30	55.7	5.62
P48553	Trafficking protein particle complex subunit 10 OS=Homo sapiens OX=9606 GN=TRAPPC10 PE=1 SV=2	11	142.1	6.04
Q8IVL6	Prolyl 3-hydroxylase 3 OS=Homo sapiens OX=9606 GN=P3H3 PE=1 SV=1	17	81.8	6.32
B7Z390	cDNA FLJ53336, highly similar to ADAM 15 OS=Homo sapiens OX=9606 PE=2 SV=1	13	87.3	6.42
A9UK01	Rho GTPase activating protein OS=Homo sapiens OX=9606 PE=2 SV=1	18	74.9	6.18
Q6NSI4	RPA-related protein RADX OS=Homo sapiens OX=9606 GN=RADX PE=1 SV=2	17	97.5	8.41
Q8WXE0	Caskin-2 OS=Homo sapiens OX=9606 GN=CASKIN2 PE=1 SV=2	11	126.7	7.09
Q8IZ21	Phosphatase and actin regulator 4 OS=Homo sapiens OX=9606 GN=PHACTR4 PE=1 SV=1	21	78.2	6.62
B3KRJ9	cDNA FLJ34439 fis, clone HLUNG2001146, highly similar to Splicing factor, arginine/serine-rich 12 OS=Homo sapiens OX=9606 PE=2 SV=1	16	58.2	9.92
P31689	DnaJ homolog subfamily A member 1 OS=Homo sapiens OX=9606 GN=DNAJA1 PE=1 SV=2	24	44.8	7.08
Q6VY07	Phosphofurin acidic cluster sorting protein 1 OS=Homo sapiens OX=9606 GN=PACS1 PE=1 SV=2	14	104.8	7.74
Q6ZMN5	PAN2-PAN3 deadenylation complex subunit PAN3 OS=Homo sapiens OX=9606 GN=PAN3 PE=2 SV=1	18	53.6	7.55
A0A024QZJ6	Myosin, heavy polypeptide 11, smooth muscle, isoform CRA_b OS=Homo sapiens OX=9606 GN=MYH11 PE=3 SV=1	5	223.4	5.53
Q7Z7F0	KH homology domain-containing protein 4 OS=Homo sapiens OX=9606 GN=KHDC4 PE=1 SV=1	15	64.8	8.73
Q8NHU6	Tudor domain-containing protein 7 OS=Homo sapiens OX=9606 GN=TDRD7 PE=1 SV=2	16	123.5	7.21
A0A0C4DGV9	DNA ligase OS=Homo sapiens OX=9606 GN=LIG4 PE=1 SV=1	16	96.2	7.69
O94829	Importin-13 OS=Homo sapiens OX=9606 GN=IPO13 PE=1 SV=3	17	108.1	5.3
B4DPZ3	cDNA FLJ53290, highly similar to Cytoplasmic dynein 1 intermediate chain 2 OS=Homo sapiens OX=9606 PE=2 SV=1	14	70.4	5.3
Q7Z2T5	TRMT1-like protein OS=Homo sapiens OX=9606 GN=TRMT1L PE=1 SV=2	19	81.7	7.88
Q13112	Chromatin assembly factor 1 subunit B OS=Homo sapiens OX=9606 GN=CHAF1B PE=1 SV=1	18	61.5	7.5
O15355	Protein phosphatase 1G OS=Homo sapiens OX=9606 GN=PPM1G PE=1 SV=1	25	59.2	4.36
Q9H078	Caseinolytic peptidase B protein homolog OS=Homo sapiens OX=9606 GN=CLPB PE=1 SV=1	19	78.7	9.01
Q03701	CCAAT/enhancer-binding protein zeta OS=Homo sapiens OX=9606 GN=CEBPZ PE=1 SV=3	10	120.9	5.94
J3QS41	Probable helicase with zinc finger domain OS=Homo sapiens OX=9606 GN=HELZ PE=1 SV=1	9	218.9	7.42
Q6ZRQ5	Protein MMS22-like OS=Homo sapiens OX=9606 GN=MMS22L PE=1 SV=3	10	142.2	7.12
Q5HYL4	Uncharacterized protein DKFZp686E1893 OS=Homo sapiens OX=9606 GN=DKFZp686E1893 PE=2 SV=1	20	69.4	7.28
P41743	Protein kinase C iota type OS=Homo sapiens OX=9606 GN=PRKCI PE=1 SV=2	14	68.2	5.85
A8K1Z3	cDNA FLJ75002, highly similar to Homo sapiens, neural cell expressed,developmentally down-regulated gene 1 OS=Homo sapiens OX=9606 PE=2 SV=1	14	71.9	7.83
B4DRG0	cDNA FLJ51764, highly similar to Histone deacetylase 1 OS=Homo sapiens OX=9606 PE=2 SV=1	32	32.7	4.82
Q5JTZ9	Alanine--tRNA ligase, mitochondrial OS=Homo sapiens OX=9606 GN=AARS2 PE=1 SV=1	14	107.3	6.27
Q5VWU8	Partitioning defective 3 homolog OS=Homo sapiens OX=9606 GN=PARD3 PE=1 SV=1	15	109.9	6.6
Q96T51	RUN and FYVE domain-containing protein 1 OS=Homo sapiens OX=9606 GN=RUFY1 PE=1 SV=2	18	79.8	5.74
Q9UHI6	Probable ATP-dependent RNA helicase DDX20 OS=Homo sapiens OX=9606 GN=DDX20 PE=1 SV=2	18	92.2	6.95
Q53R41	FAST kinase domain-containing protein 1, mitochondrial OS=Homo sapiens OX=9606 GN=FASTKD1 PE=1 SV=1	18	97.3	7.74
P33981	Dual specificity protein kinase TTK OS=Homo sapiens OX=9606 GN=TTK PE=1 SV=2	14	97	8.16
Q53HM6	Splicing factor 3a, subunit 3 variant (Fragment) OS=Homo sapiens OX=9606 PE=2 SV=1	23	58.8	5.38
O00401	Neural Wiskott-Aldrich syndrome protein OS=Homo sapiens OX=9606 GN=WASL PE=1 SV=2	21	54.8	7.93
P39023	60S ribosomal protein L3 OS=Homo sapiens OX=9606 GN=RPL3 PE=1 SV=2	25	46.1	10.18
Q96FV9	THO complex subunit 1 OS=Homo sapiens OX=9606 GN=THOC1 PE=1 SV=1	18	75.6	4.98
O94967	WD repeat-containing protein 47 OS=Homo sapiens OX=9606 GN=WDR47 PE=1 SV=1	14	101.9	5.94
Q05CP8	CCDC6 protein (Fragment) OS=Homo sapiens OX=9606 GN=CCDC6 PE=2 SV=1	28	38.1	9.39
Q53H47	Histone-lysine N-methyltransferase SETMAR OS=Homo sapiens OX=9606 GN=SETMAR PE=1 SV=2	16	78	7.14
P41091	Eukaryotic translation initiation factor 2 subunit 3 OS=Homo sapiens OX=9606 GN=EIF2S3 PE=1 SV=3	31	51.1	8.4
Q9H6F5	Coiled-coil domain-containing protein 86 OS=Homo sapiens OX=9606 GN=CCDC86 PE=1 SV=1	23	40.2	10.33
Q9UBL3	Set1/Ash2 histone methyltransferase complex subunit ASH2 OS=Homo sapiens OX=9606 GN=ASH2L PE=1 SV=1	19	68.7	5.69
P48378	DNA-binding protein RFX2 OS=Homo sapiens OX=9606 GN=RFX2 PE=1 SV=2	12	79.9	6.79
A8K4G7	cDNA FLJ78528, highly similar to Homo sapiens vacuolar protein sorting 4B (yeast) (VPS4B), mRNA OS=Homo sapiens OX=9606 PE=2 SV=1	31	49.2	6.76
P11274	Breakpoint cluster region protein OS=Homo sapiens OX=9606 GN=BCR PE=1 SV=2	10	142.7	7.03
A0A024R7K7	GATA zinc finger domain containing 2A, isoform CRA_b OS=Homo sapiens OX=9606 GN=GATAD2A PE=4 SV=1	27	68	9.94
Q9NRL3	Striatin-4 OS=Homo sapiens OX=9606 GN=STRN4 PE=1 SV=2	15	80.5	5.4
Q8WYA6	Beta-catenin-like protein 1 OS=Homo sapiens OX=9606 GN=CTNNBL1 PE=1 SV=1	26	65.1	5.05
Q9BYK8	Helicase with zinc finger domain 2 OS=Homo sapiens OX=9606 GN=HELZ2 PE=1 SV=6	7	294.5	7.49
Q9HCC0	Methylcrotonoyl-CoA carboxylase beta chain, mitochondrial OS=Homo sapiens OX=9606 GN=MCCC2 PE=1 SV=1	17	61.3	7.68
Q14181	DNA polymerase alpha subunit B OS=Homo sapiens OX=9606 GN=POLA2 PE=1 SV=2	17	65.9	5.24
H0Y4V9	La-related protein 4B (Fragment) OS=Homo sapiens OX=9606 GN=LARP4B PE=1 SV=1	28	36.6	9.99
Q8NC51	Plasminogen activator inhibitor 1 RNA-binding protein OS=Homo sapiens OX=9606 GN=SERBP1 PE=1 SV=2	23	44.9	8.65
A0A2X0U2J9	FGD4 (Fragment) OS=Homo sapiens OX=9606 GN=FGD4 PE=4 SV=1	18	86.8	6.13
J3KNN7	BRCA1-associated protein OS=Homo sapiens OX=9606 GN=BRAP PE=1 SV=1	20	64.2	6.01
Q9NQZ2	Something about silencing protein 10 OS=Homo sapiens OX=9606 GN=UTP3 PE=1 SV=1	14	54.5	5.62
A0A2R8Y7G1	Aryl hydrocarbon receptor OS=Homo sapiens OX=9606 GN=AHR PE=1 SV=1	16	94.4	6.14
P46019	Phosphorylase b kinase regulatory subunit alpha, liver isoform OS=Homo sapiens OX=9606 GN=PHKA2 PE=1 SV=1	11	138.3	6.44
Q8NI92	RNA helicase OS=Homo sapiens OX=9606 GN=OK/SW-cl.65 PE=2 SV=1	45	16.4	10.17
Q9UII7	Cadherin-1 OS=Homo sapiens OX=9606 PE=2 SV=1	13	99.6	4.78
Q9Y2D5	A-kinase anchor protein 2 OS=Homo sapiens OX=9606 GN=AKAP2 PE=1 SV=3	12	94.6	5.11
Q460N5	Protein mono-ADP-ribosyltransferase PARP14 OS=Homo sapiens OX=9606 GN=PARP14 PE=1 SV=3	6	202.7	7.18
Q06587	E3 ubiquitin-protein ligase RING1 OS=Homo sapiens OX=9606 GN=RING1 PE=1 SV=2	19	42.4	5.62
Q06830	Peroxiredoxin-1 OS=Homo sapiens OX=9606 GN=PRDX1 PE=1 SV=1	69	22.1	8.13
A0A024R983	TROVE domain family, member 2, isoform CRA_b OS=Homo sapiens OX=9606 GN=TROVE2 PE=3 SV=1	20	60.6	8.03
P40222	Alpha-taxilin OS=Homo sapiens OX=9606 GN=TXLNA PE=1 SV=3	19	61.9	6.52
Q5NDL2	EGF domain-specific O-linked N-acetylglucosamine transferase OS=Homo sapiens OX=9606 GN=EOGT PE=1 SV=1	19	62	7.05
A8K7F7	cDNA FLJ76913, highly similar to Homo sapiens F-box protein 7 (FBXO7), mRNA OS=Homo sapiens OX=9606 PE=2 SV=1	16	58.5	6.55
P33240	Cleavage stimulation factor subunit 2 OS=Homo sapiens OX=9606 GN=CSTF2 PE=1 SV=1	20	60.9	6.83
Q9NVX2	Notchless protein homolog 1 OS=Homo sapiens OX=9606 GN=NLE1 PE=1 SV=4	24	53.3	7.34
B3KS36	cDNA FLJ35376 fis, clone SKMUS2004044, highly similar to Homo sapiens ribosomal protein L3 (RPL3), transcript variant 2, mRNA OS=Homo sapiens OX=9606 PE=2 SV=1	28	40.1	10.3
Q8TEM1	Nuclear pore membrane glycoprotein 210 OS=Homo sapiens OX=9606 GN=NUP210 PE=1 SV=3	8	205	6.81
A0A2X0SFI2	SRGAP1 (Fragment) OS=Homo sapiens OX=9606 GN=SRGAP1 PE=4 SV=1	12	124.4	6.83
Q9Y4W2	Ribosomal biogenesis protein LAS1L OS=Homo sapiens OX=9606 GN=LAS1L PE=1 SV=2	17	83	4.73
G3V1R5	Nardilysin OS=Homo sapiens OX=9606 GN=NRDC PE=1 SV=1	12	125	4.91
Q9ULD0	2-oxoglutarate dehydrogenase-like, mitochondrial OS=Homo sapiens OX=9606 GN=OGDHL PE=1 SV=3	9	114.4	6.65
A0A024R6N2	Non-specific serine/threonine protein kinase OS=Homo sapiens OX=9606 GN=CDC42BPB PE=3 SV=1	8	194.2	6.37
Q6I9S2	SNW domain-containing protein 1 OS=Homo sapiens OX=9606 GN=SNW1 PE=2 SV=1	23	61.4	9.48
A0A024QZ89	Component of oligomeric Golgi complex 4 OS=Homo sapiens OX=9606 GN=COG4 PE=3 SV=1	17	89.5	5.21
Q9H6R0	ATP-dependent RNA helicase DHX33 OS=Homo sapiens OX=9606 GN=DHX33 PE=1 SV=2	19	78.8	8.91
Q6P1J9	Parafibromin OS=Homo sapiens OX=9606 GN=CDC73 PE=1 SV=1	21	60.5	9.61
A0A0A7E6I2	Aminopeptidase (Fragment) OS=Homo sapiens OX=9606 GN=ERAP1 PE=2 SV=1	14	107.1	6.34
A0A2X0TVY0	FARP1 (Fragment) OS=Homo sapiens OX=9606 GN=FARP1 PE=4 SV=1	12	118.6	8.15
Q04724	Transducin-like enhancer protein 1 OS=Homo sapiens OX=9606 GN=TLE1 PE=1 SV=2	12	83.1	7.24
P17301	Integrin alpha-2 OS=Homo sapiens OX=9606 GN=ITGA2 PE=1 SV=1	10	129.2	5.31
Q9UJV9	Probable ATP-dependent RNA helicase DDX41 OS=Homo sapiens OX=9606 GN=DDX41 PE=1 SV=2	22	69.8	6.84
O15371	Eukaryotic translation initiation factor 3 subunit D OS=Homo sapiens OX=9606 GN=EIF3D PE=1 SV=1	24	63.9	6.05
Q13472	DNA topoisomerase 3-alpha OS=Homo sapiens OX=9606 GN=TOP3A PE=1 SV=1	11	112.3	8.34
G3V325	ATP5MF-PTCD1 readthrough OS=Homo sapiens OX=9606 GN=ATP5MF-PTCD1 PE=4 SV=1	16	84.1	8.72
Q9HA65	TBC1 domain family member 17 OS=Homo sapiens OX=9606 GN=TBC1D17 PE=1 SV=2	14	72.7	5.19
A0A024R382	CNDP dipeptidase 2 (Metallopeptidase M20 family), isoform CRA_d OS=Homo sapiens OX=9606 GN=CNDP2 PE=3 SV=1	41	40.3	5.62
Q4G176	Malonate--CoA ligase ACSF3, mitochondrial OS=Homo sapiens OX=9606 GN=ACSF3 PE=1 SV=3	25	64.1	8.37
O75179	Ankyrin repeat domain-containing protein 17 OS=Homo sapiens OX=9606 GN=ANKRD17 PE=1 SV=3	4	274.1	6.52
B5BUK7	Protein kinase C iota type (Fragment) OS=Homo sapiens OX=9606 GN=PRKCI PE=2 SV=1	14	67.2	5.85
B7Z5B0	cDNA FLJ51936, highly similar to Nef-associated factor 1 OS=Homo sapiens OX=9606 PE=2 SV=1	16	67.7	6.52
D6RER5	Septin OS=Homo sapiens OX=9606 GN=SEPTIN11 PE=1 SV=1	25	49.8	6.68
B7Z3T9	cDNA FLJ53345, highly similar to Leucine-zipper-like transcriptional regulator1 OS=Homo sapiens OX=9606 PE=2 SV=1	12	92.3	6.51
P31327	Carbamoyl-phosphate synthase [ammonia], mitochondrial OS=Homo sapiens OX=9606 GN=CPS1 PE=1 SV=2	9	164.8	6.74
Q9P0V9	Septin-10 OS=Homo sapiens OX=9606 GN=SEPTIN10 PE=1 SV=2	30	52.6	6.8
F8WA39	Phosphatidylinositol-3,5-bisphosphate 3-phosphatase OS=Homo sapiens OX=9606 GN=MTMR1 PE=1 SV=1	12	75.7	7.39
A0A024R892	Leucine rich repeat containing 8 family, member A, isoform CRA_a OS=Homo sapiens OX=9606 GN=LRRC8A PE=3 SV=1	18	94.1	7.94
Q9BV37	PWP1 homolog (S. cerevisiae) OS=Homo sapiens OX=9606 GN=PWP1 PE=2 SV=1	20	55.8	4.79
A0A024R8N4	HCG1776081, isoform CRA_a OS=Homo sapiens OX=9606 GN=hCG_1776081 PE=3 SV=1	13	88	6.86
Q1KKQ2	Serine/threonine-protein kinase OS=Homo sapiens OX=9606 GN=PRKD1 PE=3 SV=1	9	101.8	6.62
Q99523	Sortilin OS=Homo sapiens OX=9606 GN=SORT1 PE=1 SV=3	10	92	5.74
Q5T2E6	Armadillo-like helical domain-containing protein 3 OS=Homo sapiens OX=9606 GN=ARMH3 PE=1 SV=1	20	78.7	6.6
H0Y8W5	Rho GTPase-activating protein 10 (Fragment) OS=Homo sapiens OX=9606 GN=ARHGAP10 PE=1 SV=1	25	45.8	6.4
E7EUC7	UTP--glucose-1-phosphate uridylyltransferase OS=Homo sapiens OX=9606 GN=UGP2 PE=1 SV=1	23	57.8	8.13
Q9H863	cDNA FLJ13924 fis, clone Y79AA1000540, weakly similar to CELL POLARITY PROTEIN TEA1 OS=Homo sapiens OX=9606 PE=2 SV=1	15	57.8	5.81
Q6DKJ3	Acetyl-coenzyme A synthetase (Fragment) OS=Homo sapiens OX=9606 GN=ACSS2 PE=2 SV=1	25	74.5	6.39
O43815	Striatin OS=Homo sapiens OX=9606 GN=STRN PE=1 SV=4	14	86.1	5.27
Q9BVS4	Serine/threonine-protein kinase RIO2 OS=Homo sapiens OX=9606 GN=RIOK2 PE=1 SV=2	21	63.2	5.94
Q9NWH9	SAFB-like transcription modulator OS=Homo sapiens OX=9606 GN=SLTM PE=1 SV=2	10	117.1	7.87
Q15642	Cdc42-interacting protein 4 OS=Homo sapiens OX=9606 GN=TRIP10 PE=1 SV=3	18	68.3	5.73
O00505	Importin subunit alpha-4 OS=Homo sapiens OX=9606 GN=KPNA3 PE=1 SV=2	26	57.8	4.94
P29590	Protein PML OS=Homo sapiens OX=9606 GN=PML PE=1 SV=3	11	97.5	6.21
O75131	Copine-3 OS=Homo sapiens OX=9606 GN=CPNE3 PE=1 SV=1	19	60.1	5.85
Q96EE3	Nucleoporin SEH1 OS=Homo sapiens OX=9606 GN=SEH1L PE=1 SV=3	23	39.6	8.09
A6PW57	Phosphatidylinositol 4-phosphate 5-kinase type-1 alpha OS=Homo sapiens OX=9606 GN=PIP5K1A PE=1 SV=2	18	61.2	8.34
A0A0G2JNY3	Rho GTPase-activating protein 27 OS=Homo sapiens OX=9606 GN=ARHGAP27 PE=1 SV=1	13	98.4	5.64
Q5T5C7	Seryl-tRNA synthetase OS=Homo sapiens OX=9606 GN=SARS1 PE=1 SV=1	16	61.3	7.06
P42695	Condensin-2 complex subunit D3 OS=Homo sapiens OX=9606 GN=NCAPD3 PE=1 SV=2	9	168.8	7.5
Q9H6T3	RNA polymerase II-associated protein 3 OS=Homo sapiens OX=9606 GN=RPAP3 PE=1 SV=2	24	75.7	6.84
Q9UIG0	Tyrosine-protein kinase BAZ1B OS=Homo sapiens OX=9606 GN=BAZ1B PE=1 SV=2	8	170.8	8.48
B3KUM5	cDNA FLJ40245 fis, clone TESTI2023968, highly similar to GC-RICH SEQUENCE DNA-BINDING FACTOR OS=Homo sapiens OX=9606 PE=2 SV=1	19	71.3	5.85
O00291	Huntingtin-interacting protein 1 OS=Homo sapiens OX=9606 GN=HIP1 PE=1 SV=5	8	116.1	5.3
H7C4G8	5'-nucleotidase domain-containing protein 2 (Fragment) OS=Homo sapiens OX=9606 GN=NT5DC2 PE=1 SV=1	34	30.1	5.96
Q14554	Protein disulfide-isomerase A5 OS=Homo sapiens OX=9606 GN=PDIA5 PE=1 SV=1	23	59.6	7.91
Q9UP83	Conserved oligomeric Golgi complex subunit 5 OS=Homo sapiens OX=9606 GN=COG5 PE=1 SV=3	15	92.7	6.6
E7ESP4	Integrin alpha-2 OS=Homo sapiens OX=9606 GN=ITGA2 PE=1 SV=1	13	102.8	5.15
A0A384N6H6	Septin OS=Homo sapiens OX=9606 PE=2 SV=1	22	42.7	6.86
A0A2X0TVZ9	Phosphoinositide 5-phosphatase (Fragment) OS=Homo sapiens OX=9606 GN=OCRL PE=3 SV=1	15	103.2	6.77
Q9UJX6	Anaphase-promoting complex subunit 2 OS=Homo sapiens OX=9606 GN=ANAPC2 PE=1 SV=1	14	93.8	5.22
O15231	Zinc finger protein 185 OS=Homo sapiens OX=9606 GN=ZNF185 PE=1 SV=3	14	73.5	7.01
Q6PGP7	Tetratricopeptide repeat protein 37 OS=Homo sapiens OX=9606 GN=TTC37 PE=1 SV=1	9	175.4	7.53
Q53ET9	RBR-type E3 ubiquitin transferase (Fragment) OS=Homo sapiens OX=9606 PE=2 SV=1	15	57.8	5.63
A8K5U9	cDNA FLJ75056, highly similar to Homo sapiens phosphatidylinositol binding clathrin assembly protein (PICALM), mRNA OS=Homo sapiens OX=9606 PE=2 SV=1	15	70.7	7.62
Q6YHU6	Thyroid adenoma-associated protein OS=Homo sapiens OX=9606 GN=THADA PE=1 SV=1	7	219.5	6.06
B2R4R0	Histone H4 OS=Homo sapiens OX=9606 GN=HIST1H4J PE=2 SV=1	43	11.4	11.36
Q6ZMU5	Tripartite motif-containing protein 72 OS=Homo sapiens OX=9606 GN=TRIM72 PE=1 SV=2	18	52.7	6.48
A8K9J6	cDNA FLJ78024 OS=Homo sapiens OX=9606 PE=2 SV=1	22	41.7	4.81
Q5VT52	Regulation of nuclear pre-mRNA domain-containing protein 2 OS=Homo sapiens OX=9606 GN=RPRD2 PE=1 SV=1	8	155.9	7.42
Q86WN1	F-BAR and double SH3 domains protein 1 OS=Homo sapiens OX=9606 GN=FCHSD1 PE=1 SV=1	14	76.9	5.34
Q5T5Y3	Calmodulin-regulated spectrin-associated protein 1 OS=Homo sapiens OX=9606 GN=CAMSAP1 PE=1 SV=2	8	177.9	6.73
E9PD50	Protein SMG7 OS=Homo sapiens OX=9606 GN=SMG7 PE=1 SV=1	8	130.8	7.88
P13798	Acylamino-acid-releasing enzyme OS=Homo sapiens OX=9606 GN=APEH PE=1 SV=4	12	81.2	5.48
Q96PU4	E3 ubiquitin-protein ligase UHRF2 OS=Homo sapiens OX=9606 GN=UHRF2 PE=1 SV=1	13	89.9	8.21
Q9UPN7	Serine/threonine-protein phosphatase 6 regulatory subunit 1 OS=Homo sapiens OX=9606 GN=PPP6R1 PE=1 SV=5	12	96.7	4.55
A8K031	Kinetochore protein Hec1 OS=Homo sapiens OX=9606 GN=KNTC2 PE=2 SV=1	17	73.9	5.6
P38432	Coilin OS=Homo sapiens OX=9606 GN=COIL PE=1 SV=1	17	62.6	9.07
B7Z5W0	cDNA FLJ53174, highly similar to Numb-like protein OS=Homo sapiens OX=9606 PE=1 SV=1	15	60.5	8.88
F5H7A5	Caseinolytic peptidase B protein homolog (Fragment) OS=Homo sapiens OX=9606 GN=CLPB PE=1 SV=8	42	17	6.95
Q96DU7	Inositol-trisphosphate 3-kinase C OS=Homo sapiens OX=9606 GN=ITPKC PE=1 SV=1	12	75.2	5.14
Q8TED0	U3 small nucleolar RNA-associated protein 15 homolog OS=Homo sapiens OX=9606 GN=UTP15 PE=1 SV=3	24	58.4	9.11
A0A024RBK8	RAS protein activator like 1 (GAP1 like), isoform CRA_b OS=Homo sapiens OX=9606 GN=RASAL1 PE=4 SV=1	15	90.1	6.39
Q8IWV8	E3 ubiquitin-protein ligase UBR2 OS=Homo sapiens OX=9606 GN=UBR2 PE=1 SV=1	7	200.4	6.24
Q5T9A4	ATPase family AAA domain-containing protein 3B OS=Homo sapiens OX=9606 GN=ATAD3B PE=1 SV=1	17	72.5	9.2
A0A7I2V5R1	Serine/threonine-protein kinase Nek9 OS=Homo sapiens OX=9606 GN=NEK9 PE=1 SV=1	12	108.4	5.85
Q53F88	Transcription initiation factor IIE subunit alpha (Fragment) OS=Homo sapiens OX=9606 PE=2 SV=1	22	40.1	5.26
Q9NVF4	cDNA FLJ10770 fis, clone NT2RP4000159 OS=Homo sapiens OX=9606 PE=2 SV=1	57	17.7	10.01
B7Z4Q0	cDNA FLJ55728, highly similar to ADP-ribosylation factor GTPase-activating protein 3 OS=Homo sapiens OX=9606 PE=2 SV=1	20	48.9	7.59
A8KAN5	cDNA FLJ75097, highly similar to Homo sapiens upstream binding protein 1 (LBP-1a) (UBP1), mRNA OS=Homo sapiens OX=9606 PE=2 SV=1	13	60.5	6.44
Q14451	Growth factor receptor-bound protein 7 OS=Homo sapiens OX=9606 GN=GRB7 PE=1 SV=2	15	59.6	8.5
A8K9T9	Formylglycinamide ribonucleotide amidotransferase OS=Homo sapiens OX=9606 PE=2 SV=1	8	144.6	5.8
Q10570	Cleavage and polyadenylation specificity factor subunit 1 OS=Homo sapiens OX=9606 GN=CPSF1 PE=1 SV=2	10	160.8	6.4
Q9BZF2	Oxysterol-binding protein-related protein 7 OS=Homo sapiens OX=9606 GN=OSBPL7 PE=1 SV=1	14	95.4	8.05
Q6P1X5	Transcription initiation factor TFIID subunit 2 OS=Homo sapiens OX=9606 GN=TAF2 PE=1 SV=3	9	136.9	8.19
B4DLG2	cDNA FLJ58196, highly similar to Zinc finger CCCH domain-containing protein 11A OS=Homo sapiens OX=9606 PE=2 SV=1	21	82.7	8.65
Q8IYI6	Exocyst complex component 8 OS=Homo sapiens OX=9606 GN=EXOC8 PE=1 SV=2	18	81.7	5.49
Q68DD9	Uncharacterized protein DKFZp781C0423 (Fragment) OS=Homo sapiens OX=9606 GN=DKFZp781C0423 PE=2 SV=2	19	57.4	10.27
O60382	KIAA0324 (Fragment) OS=Homo sapiens OX=9606 GN=KIAA0324 PE=4 SV=1	5	191.2	11.93
B3KMN2	cDNA FLJ11695 fis, clone HEMBA1005019, highly similar to Homo sapiens SCC-112 protein (SCC-112), mRNA OS=Homo sapiens OX=9606 PE=2 SV=1	16	36.4	8.75
B3KQ21	cDNA FLJ32640 fis, clone SYNOV2001033, highly similar to U3 small nucleolar RNA-associated protein 6 homolog OS=Homo sapiens OX=9606 PE=2 SV=1	20	70.2	7.46
Q7Z3E9	Uncharacterized protein DKFZp686J1286 (Fragment) OS=Homo sapiens OX=9606 GN=DKFZp686J1286 PE=2 SV=1	14	93	5.55
K7EMK7	Transducin-like enhancer protein 2 OS=Homo sapiens OX=9606 GN=TLE2 PE=1 SV=1	10	79.9	6.62
D3DNA1	Integrin beta OS=Homo sapiens OX=9606 GN=ITGB5 PE=3 SV=1	12	76.7	5.77
B3KY42	cDNA FLJ46788 fis, clone TRACH3028855, highly similar to Pseudouridylate synthase 7 homolog OS=Homo sapiens OX=9606 PE=2 SV=1	20	75	6.19
A0A024RAC7	Multifunctional fusion protein OS=Homo sapiens OX=9606 GN=ALDH4A1 PE=2 SV=1	17	61.7	8.07
Q7Z434	Mitochondrial antiviral-signaling protein OS=Homo sapiens OX=9606 GN=MAVS PE=1 SV=2	17	56.5	5.52
Q9Y5B6	PAX3- and PAX7-binding protein 1 OS=Homo sapiens OX=9606 GN=PAXBP1 PE=1 SV=2	12	104.7	5.68
Q04864	Proto-oncogene c-Rel OS=Homo sapiens OX=9606 GN=REL PE=1 SV=1	22	68.5	5.86
A0A024R663	Kinectin 1 (Kinesin receptor), isoform CRA_a OS=Homo sapiens OX=9606 GN=KTN1 PE=4 SV=1	8	156.2	5.64
Q6ZUJ8	Phosphoinositide 3-kinase adapter protein 1 OS=Homo sapiens OX=9606 GN=PIK3AP1 PE=1 SV=2	16	90.3	5.4
A0A024RA87	Septin OS=Homo sapiens OX=9606 GN=SEPT7 PE=3 SV=1	18	44.8	8.22
Q9HD26	Golgi-associated PDZ and coiled-coil motif-containing protein OS=Homo sapiens OX=9606 GN=GOPC PE=1 SV=1	18	50.5	5.92
P48426	Phosphatidylinositol 5-phosphate 4-kinase type-2 alpha OS=Homo sapiens OX=9606 GN=PIP4K2A PE=1 SV=2	17	46.2	6.99
Q09028	Histone-binding protein RBBP4 OS=Homo sapiens OX=9606 GN=RBBP4 PE=1 SV=3	31	47.6	4.89
Q96GX5	Serine/threonine-protein kinase greatwall OS=Homo sapiens OX=9606 GN=MASTL PE=1 SV=1	14	97.3	5.99
Q9Y4B6	DDB1- and CUL4-associated factor 1 OS=Homo sapiens OX=9606 GN=DCAF1 PE=1 SV=3	8	168.9	5.06
P42336	Phosphatidylinositol 4,5-bisphosphate 3-kinase catalytic subunit alpha isoform OS=Homo sapiens OX=9606 GN=PIK3CA PE=1 SV=2	10	124.2	7.23
O95239	Chromosome-associated kinesin KIF4A OS=Homo sapiens OX=9606 GN=KIF4A PE=1 SV=3	12	139.8	6.27
Q96RP9	Elongation factor G, mitochondrial OS=Homo sapiens OX=9606 GN=GFM1 PE=1 SV=2	13	83.4	7.01
A8K690	cDNA FLJ76863, highly similar to Homo sapiens stress-induced-phosphoprotein 1 (Hsp70/Hsp90-organizing protein) (STIP1), mRNA OS=Homo sapiens OX=9606 PE=2 SV=1	18	62.6	6.8
A8KAL2	Golgin subfamily A member 5 OS=Homo sapiens OX=9606 PE=2 SV=1	19	82.9	5.83
B9A6K8	TBC1 domain family, member 9B OS=Homo sapiens OX=9606 GN=TBC1D9B PE=2 SV=1	7	140.4	5.24
P35626	Beta-adrenergic receptor kinase 2 OS=Homo sapiens OX=9606 GN=GRK3 PE=1 SV=2	14	79.7	7.62
Q5BKZ1	DBIRD complex subunit ZNF326 OS=Homo sapiens OX=9606 GN=ZNF326 PE=1 SV=2	14	65.6	5.15
Q58FG1	Putative heat shock protein HSP 90-alpha A4 OS=Homo sapiens OX=9606 GN=HSP90AA4P PE=5 SV=1	10	47.7	5.19
Q08AD1	Calmodulin-regulated spectrin-associated protein 2 OS=Homo sapiens OX=9606 GN=CAMSAP2 PE=1 SV=3	10	168	6.8
Q6UUV7	CREB-regulated transcription coactivator 3 OS=Homo sapiens OX=9606 GN=CRTC3 PE=1 SV=2	14	66.9	6.84
Q9BST9	Rhotekin OS=Homo sapiens OX=9606 GN=RTKN PE=1 SV=2	13	62.6	7.44
Q7Z794	Keratin, type II cytoskeletal 1b OS=Homo sapiens OX=9606 GN=KRT77 PE=1 SV=3	11	61.9	5.99
A0A1B0GV70	AP-4 complex accessory subunit Tepsin OS=Homo sapiens OX=9606 GN=TEPSIN PE=1 SV=1	16	62	7.34
B4DR61	Protein transport protein Sec61 subunit alpha isoform 1 OS=Homo sapiens OX=9606 GN=SEC61A1 PE=1 SV=1	17	52.9	8.24
Q9NQW7	Xaa-Pro aminopeptidase 1 OS=Homo sapiens OX=9606 GN=XPNPEP1 PE=1 SV=3	14	69.9	5.67
A0A2R8YE10	Vacuolar protein sorting-associated protein 45 OS=Homo sapiens OX=9606 GN=VPS45 PE=1 SV=1	13	61.1	8.25
P00338	L-lactate dehydrogenase A chain OS=Homo sapiens OX=9606 GN=LDHA PE=1 SV=2	26	36.7	8.27
B3KPJ8	Lethal(3)malignant brain tumor-like protein 2 OS=Homo sapiens OX=9606 PE=2 SV=1	14	79.1	6.84
Q9P2E3	NFX1-type zinc finger-containing protein 1 OS=Homo sapiens OX=9606 GN=ZNFX1 PE=2 SV=2	5	220.1	7.3
A0A7I2V5K0	Signal recognition particle 54 kDa protein OS=Homo sapiens OX=9606 GN=SRP54 PE=1 SV=1	23	52.3	8.53
O60814	Histone H2B type 1-K OS=Homo sapiens OX=9606 GN=H2BC12 PE=1 SV=3	45	13.9	10.32
B4E218	cDNA FLJ61052, highly similar to Homo sapiens myosin head domain containing 1 (MYOHD1), transcript variant 2, mRNA OS=Homo sapiens OX=9606 PE=2 SV=1	11	109.1	7.71
A0A024QZN6	Retinoic acid induced 17, isoform CRA_a OS=Homo sapiens OX=9606 GN=RAI17 PE=4 SV=1	8	116.1	7.44
Q8IWV7	E3 ubiquitin-protein ligase UBR1 OS=Homo sapiens OX=9606 GN=UBR1 PE=1 SV=1	6	200.1	6.01
Q8IZ69	tRNA (uracil-5-)-methyltransferase homolog A OS=Homo sapiens OX=9606 GN=TRMT2A PE=1 SV=2	19	68.7	7.94
Q9Y2R4	Probable ATP-dependent RNA helicase DDX52 OS=Homo sapiens OX=9606 GN=DDX52 PE=1 SV=3	17	67.5	9.67
Q96RF0	Sorting nexin-18 OS=Homo sapiens OX=9606 GN=SNX18 PE=1 SV=2	13	68.9	5.68
Q15750	TGF-beta-activated kinase 1 and MAP3K7-binding protein 1 OS=Homo sapiens OX=9606 GN=TAB1 PE=1 SV=1	23	54.6	5.52
B7Z2P6	Peroxin-19 OS=Homo sapiens OX=9606 PE=2 SV=1	13	84.7	5.12
X5D2M8	Major vault protein (Fragment) OS=Homo sapiens OX=9606 GN=MVP PE=2 SV=1	14	99.3	5.48
B2RMQ4	Cytoskeleton associated protein 2 OS=Homo sapiens OX=9606 GN=CKAP2 PE=2 SV=1	15	76.8	9.41
A0A1W1GST9	DNA repair endonuclease XPF OS=Homo sapiens OX=9606 GN=ERCC4 PE=2 SV=1	12	103.1	6.86
Q92994	Transcription factor IIIB 90 kDa subunit OS=Homo sapiens OX=9606 GN=BRF1 PE=1 SV=1	11	73.8	5.43
Q9UQ13	Leucine-rich repeat protein SHOC-2 OS=Homo sapiens OX=9606 GN=SHOC2 PE=1 SV=2	21	64.8	8.46
Q9UM02	Prolyl endopeptidase OS=Homo sapiens OX=9606 PE=2 SV=1	15	80.7	5.86
Q06787	Synaptic functional regulator FMR1 OS=Homo sapiens OX=9606 GN=FMR1 PE=1 SV=1	15	71.1	7.42
A8K940	cDNA FLJ77630, highly similar to Homo sapiens BPY2 interacting protein 1, mRNA OS=Homo sapiens OX=9606 PE=1 SV=1	12	112.2	7.3
O00391	Sulfhydryl oxidase 1 OS=Homo sapiens OX=9606 GN=QSOX1 PE=1 SV=3	12	82.5	8.92
A0A024R6M3	Poly(A) polymerase OS=Homo sapiens OX=9606 GN=PAPOLA PE=3 SV=1	14	82.8	7.37
O75808	Calpain-15 OS=Homo sapiens OX=9606 GN=CAPN15 PE=1 SV=1	8	117.2	6.71
Q86X29	Lipolysis-stimulated lipoprotein receptor OS=Homo sapiens OX=9606 GN=LSR PE=1 SV=4	10	71.4	7.97
O94842	TOX high mobility group box family member 4 OS=Homo sapiens OX=9606 GN=TOX4 PE=1 SV=1	13	66.2	5.06
Q5JTD0	Tight junction-associated protein 1 OS=Homo sapiens OX=9606 GN=TJAP1 PE=1 SV=1	13	61.8	5.97
Q8IUC4	Rhophilin-2 OS=Homo sapiens OX=9606 GN=RHPN2 PE=1 SV=1	19	76.9	6.8
O14646	Chromodomain-helicase-DNA-binding protein 1 OS=Homo sapiens OX=9606 GN=CHD1 PE=1 SV=2	7	196.6	7.14
Q59FX9	Microtubule-associated protein (Fragment) OS=Homo sapiens OX=9606 PE=2 SV=1	25	49.8	9.51
Q9H501	ESF1 homolog OS=Homo sapiens OX=9606 GN=ESF1 PE=1 SV=1	8	98.7	5.11
B3KXZ2	cDNA FLJ46417 fis, clone THYMU3012402, highly similar to Importin alpha-1 subunit OS=Homo sapiens OX=9606 PE=2 SV=1	25	37.4	4.93
B3KMR4	cDNA FLJ12419 fis, clone MAMMA1003047, highly similar to Protein inhibitor of activated STAT protein 4 OS=Homo sapiens OX=9606 PE=2 SV=1	18	56.4	6.29
B9EH95	Armadillo repeat gene deletes in velocardiofacial syndrome OS=Homo sapiens OX=9606 GN=ARVCF PE=2 SV=1	7	104.5	6.73
Q9BZQ6	ER degradation-enhancing alpha-mannosidase-like protein 3 OS=Homo sapiens OX=9606 GN=EDEM3 PE=1 SV=2	9	104.6	4.93
Q32P44	Echinoderm microtubule-associated protein-like 3 OS=Homo sapiens OX=9606 GN=EML3 PE=1 SV=1	11	95.1	7.12
Q13740	CD166 antigen OS=Homo sapiens OX=9606 GN=ALCAM PE=1 SV=2	19	65.1	6.25
Q92547	DNA topoisomerase 2-binding protein 1 OS=Homo sapiens OX=9606 GN=TOPBP1 PE=1 SV=3	5	170.6	6.96
A8K3C5	cDNA FLJ77715, highly similar to Homo sapiens cisplatin resistance-associated overexpressed protein(LUC7A), mRNA OS=Homo sapiens OX=9606 PE=2 SV=1	16	51.4	9.79
Q53HB3	Proteasome 26S ATPase subunit 1 variant (Fragment) OS=Homo sapiens OX=9606 PE=2 SV=1	18	49.2	6.21
A0A087WYN9	ATP-dependent RNA helicase DHX29 OS=Homo sapiens OX=9606 GN=DHX29 PE=1 SV=1	8	155.2	8.15
Q9UQR0	Sex comb on midleg-like protein 2 OS=Homo sapiens OX=9606 GN=SCML2 PE=1 SV=1	15	77.2	8.54
A0A0A0MR09	Tyrosine-protein phosphatase non-receptor type 9 OS=Homo sapiens OX=9606 GN=PTPN9 PE=1 SV=1	13	66.9	8.15
Q15542	Transcription initiation factor TFIID subunit 5 OS=Homo sapiens OX=9606 GN=TAF5 PE=1 SV=3	11	86.8	5.64
A0A024R3Z1	Microtubule-associated protein OS=Homo sapiens OX=9606 GN=MAP2 PE=4 SV=1	6	202.7	4.94
A0A1U9X8D3	PPP1R18 OS=Homo sapiens OX=9606 PE=4 SV=1	14	67.9	5.4
P56545	C-terminal-binding protein 2 OS=Homo sapiens OX=9606 GN=CTBP2 PE=1 SV=1	15	48.9	6.95
A0A7P0T997	Dihydrolipoyllysine-residue acetyltransferase component of pyruvate dehydrogenase complex, mitochondrial OS=Homo sapiens OX=9606 GN=DLAT PE=4 SV=1	14	67.8	7.84
Q9H0M0	NEDD4-like E3 ubiquitin-protein ligase WWP1 OS=Homo sapiens OX=9606 GN=WWP1 PE=1 SV=1	6	105.1	5.9
Q53H22	Amidophosphoribosyltransferase (Fragment) OS=Homo sapiens OX=9606 PE=2 SV=1	18	57.3	6.76
O60502	Protein O-GlcNAcase OS=Homo sapiens OX=9606 GN=OGA PE=1 SV=2	12	102.8	4.91
J3KSW2	DNA polymerase iota OS=Homo sapiens OX=9606 GN=POLI PE=1 SV=1	9	71.8	6.86
Q15554	Telomeric repeat-binding factor 2 OS=Homo sapiens OX=9606 GN=TERF2 PE=1 SV=3	15	59.6	9.35
B4DDG3	Cleavage stimulation factor 50 kDa subunit OS=Homo sapiens OX=9606 PE=2 SV=1	18	46.8	6.46
A6NHL2	Tubulin alpha chain-like 3 OS=Homo sapiens OX=9606 GN=TUBAL3 PE=1 SV=2	8	49.9	6.05
Q9UPZ3	Hermansky-Pudlak syndrome 5 protein OS=Homo sapiens OX=9606 GN=HPS5 PE=1 SV=2	10	127.4	5.54
A0A024RBK3	60S ribosomal protein L6 OS=Homo sapiens OX=9606 GN=RPL6 PE=3 SV=1	25	32.7	10.58
B0YIW5	Coatomer subunit delta OS=Homo sapiens OX=9606 GN=ARCN1 PE=2 SV=1	23	57.2	6.21
A6NMQ1	DNA polymerase OS=Homo sapiens OX=9606 GN=POLA1 PE=1 SV=1	9	166.4	5.81
Q96NW4	Ankyrin repeat domain-containing protein 27 OS=Homo sapiens OX=9606 GN=ANKRD27 PE=1 SV=2	14	116.9	6.87
Q8NCE2	Myotubularin-related protein 14 OS=Homo sapiens OX=9606 GN=MTMR14 PE=1 SV=2	9	72.2	6.24
K7EKI8	Periplakin OS=Homo sapiens OX=9606 GN=PPL PE=1 SV=1	6	204.4	5.62
Q99543	DnaJ homolog subfamily C member 2 OS=Homo sapiens OX=9606 GN=DNAJC2 PE=1 SV=4	16	72	8.7
Q5JSZ5	Protein PRRC2B OS=Homo sapiens OX=9606 GN=PRRC2B PE=1 SV=2	6	242.8	8.34
Q6IPN0	Reticulon OS=Homo sapiens OX=9606 GN=RTN4 PE=2 SV=1	16	36.9	4.81
A0A024RCE9	BR serine/threonine kinase 2, isoform CRA_c OS=Homo sapiens OX=9606 GN=BRSK2 PE=4 SV=1	22	75.1	8.91
Q8TEY7	Ubiquitin carboxyl-terminal hydrolase 33 OS=Homo sapiens OX=9606 GN=USP33 PE=1 SV=2	14	106.7	6.02
P10253	Lysosomal alpha-glucosidase OS=Homo sapiens OX=9606 GN=GAA PE=1 SV=4	11	105.3	6
Q13574	Diacylglycerol kinase zeta OS=Homo sapiens OX=9606 GN=DGKZ PE=1 SV=4	10	103.9	8.05
Q9P1Q0	Vacuolar protein sorting-associated protein 54 OS=Homo sapiens OX=9606 GN=VPS54 PE=1 SV=2	13	110.5	6.55
P62314	Small nuclear ribonucleoprotein Sm D1 OS=Homo sapiens OX=9606 GN=SNRPD1 PE=1 SV=1	55	13.3	11.56
B5MDF5	GTP-binding nuclear protein Ran OS=Homo sapiens OX=9606 GN=RAN PE=1 SV=1	30	26.2	7.01
A0A024RDV5	Fibronectin type III domain containing 3A, isoform CRA_b OS=Homo sapiens OX=9606 GN=FNDC3A PE=4 SV=1	10	125.7	7.08
Q7L8L6	FAST kinase domain-containing protein 5, mitochondrial OS=Homo sapiens OX=9606 GN=FASTKD5 PE=1 SV=1	15	86.5	8.13
Q03111	Protein ENL OS=Homo sapiens OX=9606 GN=MLLT1 PE=1 SV=2	13	62	8.59
Q2YD98	UV-stimulated scaffold protein A OS=Homo sapiens OX=9606 GN=UVSSA PE=1 SV=2	15	80.5	6.3
Q96HU1	Small G protein signaling modulator 3 OS=Homo sapiens OX=9606 GN=SGSM3 PE=1 SV=1	12	85.3	6
Q9HAU5	Regulator of nonsense transcripts 2 OS=Homo sapiens OX=9606 GN=UPF2 PE=1 SV=1	8	147.7	5.69
A0A1W2PQR6	Lysosome membrane protein 2 OS=Homo sapiens OX=9606 GN=SCARB2 PE=1 SV=1	20	51	5.16
Q969F9	Hermansky-Pudlak syndrome 3 protein OS=Homo sapiens OX=9606 GN=HPS3 PE=1 SV=1	11	113.7	6.43
P32322	Pyrroline-5-carboxylate reductase 1, mitochondrial OS=Homo sapiens OX=9606 GN=PYCR1 PE=1 SV=2	29	33.3	7.61
A0A0S2Z577	Vacuolar protein sorting 33-like protein B isoform 1 (Fragment) OS=Homo sapiens OX=9606 GN=VPS33B PE=2 SV=1	15	70.5	6.71
A0A140VJD0	Leucine-rich repeat and WD repeat-containing protein 1 OS=Homo sapiens OX=9606 PE=2 SV=1	18	70.8	7.21
Q9NV66	S-adenosyl-L-methionine-dependent tRNA 4-demethylwyosine synthase TYW1 OS=Homo sapiens OX=9606 GN=TYW1 PE=2 SV=2	14	83.6	6.87
Q8TF05	Serine/threonine-protein phosphatase 4 regulatory subunit 1 OS=Homo sapiens OX=9606 GN=PPP4R1 PE=1 SV=1	8	106.9	4.77
B7ZAR0	Coiled-coil domain-containing protein 22 OS=Homo sapiens OX=9606 PE=2 SV=1	15	65.1	7.23
Q9NSG2	Uncharacterized protein C1orf112 OS=Homo sapiens OX=9606 GN=C1orf112 PE=1 SV=1	11	96.5	6
Q9UGR2	Zinc finger CCCH domain-containing protein 7B OS=Homo sapiens OX=9606 GN=ZC3H7B PE=1 SV=2	13	109.8	7.25
A0A0G2JPT5	Cell cycle checkpoint protein RAD17 OS=Homo sapiens OX=9606 GN=RAD17 PE=1 SV=1	16	77	7.21
A0A0S2Z4Z6	Serine/arginine repetitive matrix 1 isoform 2 (Fragment) OS=Homo sapiens OX=9606 GN=SRRM1 PE=1 SV=1	10	103.9	11.84
Q86VV8	Rotatin OS=Homo sapiens OX=9606 GN=RTTN PE=1 SV=3	4	248.5	6.7
Q8IZW8	Tensin-4 OS=Homo sapiens OX=9606 GN=TNS4 PE=1 SV=3	15	76.7	7.34
Q86UY8	5'-nucleotidase domain-containing protein 3 OS=Homo sapiens OX=9606 GN=NT5DC3 PE=1 SV=1	19	63.4	8.31
Q92925	SWI/SNF-related matrix-associated actin-dependent regulator of chromatin subfamily D member 2 OS=Homo sapiens OX=9606 GN=SMARCD2 PE=1 SV=3	12	58.9	9.64
Q8IYR2	SET and MYND domain-containing protein 4 OS=Homo sapiens OX=9606 GN=SMYD4 PE=2 SV=3	14	89.2	6.83
A0A494C108	Protein KRI1 homolog OS=Homo sapiens OX=9606 GN=KRI1 PE=1 SV=1	10	83.2	5.17
A0A494BYR6	Kinesin-like protein OS=Homo sapiens OX=9606 GN=KIF18B PE=1 SV=1	10	91.9	8.28
A0A024R0Q4	Phospholipase D family, member 3, isoform CRA_b OS=Homo sapiens OX=9606 GN=PLD3 PE=3 SV=1	18	54.7	6.47
Q2F838	Eukaryotic translation elongation factor 1 gamma (Fragment) OS=Homo sapiens OX=9606 PE=2 SV=1	47	9.6	6.77
A8K946	mRNA cap guanine-N7 methyltransferase OS=Homo sapiens OX=9606 PE=2 SV=1	16	57.7	7.69
Q8NF64	Zinc finger MIZ domain-containing protein 2 OS=Homo sapiens OX=9606 GN=ZMIZ2 PE=1 SV=2	9	96.5	7.12
Q9BRZ2	E3 ubiquitin-protein ligase TRIM56 OS=Homo sapiens OX=9606 GN=TRIM56 PE=1 SV=3	12	81.4	7.74
Q92997	Segment polarity protein dishevelled homolog DVL-3 OS=Homo sapiens OX=9606 GN=DVL3 PE=1 SV=2	11	78	6.65
B3KMH8	Autophagy protein 5 OS=Homo sapiens OX=9606 PE=2 SV=1	24	32.4	5.91
Q53EP0	Fibronectin type III domain-containing protein 3B OS=Homo sapiens OX=9606 GN=FNDC3B PE=1 SV=2	7	132.8	5.95
Q9BVQ7	Spermatogenesis-associated protein 5-like protein 1 OS=Homo sapiens OX=9606 GN=SPATA5L1 PE=1 SV=2	11	80.7	8.09
O00629	Importin subunit alpha-3 OS=Homo sapiens OX=9606 GN=KPNA4 PE=1 SV=1	10	57.9	4.96
P01024	Complement C3 OS=Homo sapiens OX=9606 GN=C3 PE=1 SV=2	5	187	6.4
Q9UPQ3	Arf-GAP with GTPase, ANK repeat and PH domain-containing protein 1 OS=Homo sapiens OX=9606 GN=AGAP1 PE=1 SV=4	11	94.4	7.94
P0CG39	POTE ankyrin domain family member J OS=Homo sapiens OX=9606 GN=POTEJ PE=3 SV=1	5	117.3	5.97
Q9NR12	PDZ and LIM domain protein 7 OS=Homo sapiens OX=9606 GN=PDLIM7 PE=1 SV=1	22	49.8	8.41
Q6P597	Kinesin light chain 3 OS=Homo sapiens OX=9606 GN=KLC3 PE=1 SV=2	14	55.3	6.49
A0A0S2Z4G7	Nucleophosmin (Fragment) OS=Homo sapiens OX=9606 GN=NPM1 PE=2 SV=1	25	29.4	4.61
Q8IY37	Probable ATP-dependent RNA helicase DHX37 OS=Homo sapiens OX=9606 GN=DHX37 PE=1 SV=1	8	129.5	8.1
Q93100	Phosphorylase b kinase regulatory subunit beta OS=Homo sapiens OX=9606 GN=PHKB PE=1 SV=3	10	124.8	6.95
Q9NYL2	Mitogen-activated protein kinase kinase kinase 20 OS=Homo sapiens OX=9606 GN=MAP3K20 PE=1 SV=3	11	91.1	7.87
B7Z499	Phosphatidylinositol-3-phosphate phosphatase OS=Homo sapiens OX=9606 PE=2 SV=1	18	57.2	8.29
O60566	Mitotic checkpoint serine/threonine-protein kinase BUB1 beta OS=Homo sapiens OX=9606 GN=BUB1B PE=1 SV=3	9	119.5	5.27
Q9P2M7	Cingulin OS=Homo sapiens OX=9606 GN=CGN PE=1 SV=2	8	136.3	5.54
O15083	ERC protein 2 OS=Homo sapiens OX=9606 GN=ERC2 PE=1 SV=3	8	110.5	6.99
A0A7I2YQJ3	Cytospin-B OS=Homo sapiens OX=9606 GN=SPECC1 PE=1 SV=1	8	114.1	6.87
P02768	Albumin OS=Homo sapiens OX=9606 GN=ALB PE=1 SV=2	12	69.3	6.28
Q6VFQ6	Hemoglobin beta chain (Fragment) OS=Homo sapiens OX=9606 GN=HBB PE=3 SV=1	95	4.5	8.24
Q9UKK3	Protein mono-ADP-ribosyltransferase PARP4 OS=Homo sapiens OX=9606 GN=PARP4 PE=1 SV=3	6	192.5	5.66
Q71US4	eIF-2B-delta-like protein OS=Homo sapiens OX=9606 PE=2 SV=1	15	57.5	9.32
O43818	U3 small nucleolar RNA-interacting protein 2 OS=Homo sapiens OX=9606 GN=RRP9 PE=1 SV=1	14	51.8	7.85
Q96F86	Enhancer of mRNA-decapping protein 3 OS=Homo sapiens OX=9606 GN=EDC3 PE=1 SV=1	18	56	7.11
Q07889	Son of sevenless homolog 1 OS=Homo sapiens OX=9606 GN=SOS1 PE=1 SV=1	6	152.4	6.84
Q7L7V1	Putative pre-mRNA-splicing factor ATP-dependent RNA helicase DHX32 OS=Homo sapiens OX=9606 GN=DHX32 PE=1 SV=1	14	84.4	4.97
Q0P607	Splicing factor, arginine/serine-rich 15 OS=Homo sapiens OX=9606 GN=SFRS15 PE=2 SV=1	8	125.7	9.55
Q8IU81	Interferon regulatory factor 2-binding protein 1 OS=Homo sapiens OX=9606 GN=IRF2BP1 PE=1 SV=1	14	61.6	8.18
B4DY46	cDNA FLJ53447, highly similar to Syntaxin-binding protein 2 OS=Homo sapiens OX=9606 PE=2 SV=1	15	62.7	6.51
P42684	Tyrosine-protein kinase ABL2 OS=Homo sapiens OX=9606 GN=ABL2 PE=1 SV=1	10	128.3	8.07
Q5UIP0	Telomere-associated protein RIF1 OS=Homo sapiens OX=9606 GN=RIF1 PE=1 SV=2	4	274.3	5.52
Q8IZP0	Abl interactor 1 OS=Homo sapiens OX=9606 GN=ABI1 PE=1 SV=4	22	55	7.06
P61204	ADP-ribosylation factor 3 OS=Homo sapiens OX=9606 GN=ARF3 PE=1 SV=2	40	20.6	7.43
O14974	Protein phosphatase 1 regulatory subunit 12A OS=Homo sapiens OX=9606 GN=PPP1R12A PE=1 SV=1	9	115.2	5.4
Q5SY16	Polynucleotide 5'-hydroxyl-kinase NOL9 OS=Homo sapiens OX=9606 GN=NOL9 PE=1 SV=1	10	79.3	9.13
A0A024R2D3	THUMP domain containing 3, isoform CRA_a OS=Homo sapiens OX=9606 GN=THUMPD3 PE=3 SV=1	11	57	6.37
B4DGC5	cDNA FLJ60491, highly similar to IQ motif and Sec7 domain-containing protein 1 OS=Homo sapiens OX=9606 PE=2 SV=1	8	124.3	8.35
O95394	Phosphoacetylglucosamine mutase OS=Homo sapiens OX=9606 GN=PGM3 PE=1 SV=1	17	59.8	6.25
Q14699	Raftlin OS=Homo sapiens OX=9606 GN=RFTN1 PE=1 SV=4	13	63.1	5.67
A0A7I2V323	Heterogeneous nuclear ribonucleoproteins A2/B1 OS=Homo sapiens OX=9606 GN=HNRNPA2B1 PE=1 SV=1	21	35.2	8.87
B3KMR3	cDNA FLJ12391 fis, clone MAMMA1002684, highly similar to Transmembrane GTPase MFN2 OS=Homo sapiens OX=9606 PE=2 SV=1	21	44	6.8
P39656	Dolichyl-diphosphooligosaccharide--protein glycosyltransferase 48 kDa subunit OS=Homo sapiens OX=9606 GN=DDOST PE=1 SV=4	16	50.8	6.55
Q59FK4	Tyrosine-protein kinase (Fragment) OS=Homo sapiens OX=9606 PE=2 SV=1	10	127.2	8.87
F8VZX2	Poly(rC)-binding protein 2 OS=Homo sapiens OX=9606 GN=PCBP2 PE=1 SV=1	26	33.8	8.24
O94927	HAUS augmin-like complex subunit 5 OS=Homo sapiens OX=9606 GN=HAUS5 PE=1 SV=2	13	71.6	8.51
O95248	Myotubularin-related protein 5 OS=Homo sapiens OX=9606 GN=SBF1 PE=1 SV=4	5	208.3	6.9
Q96A33	PAT complex subunit CCDC47 OS=Homo sapiens OX=9606 GN=CCDC47 PE=1 SV=1	17	55.8	4.87
P62136	Serine/threonine-protein phosphatase PP1-alpha catalytic subunit OS=Homo sapiens OX=9606 GN=PPP1CA PE=1 SV=1	28	37.5	6.33
Q9HCE7	E3 ubiquitin-protein ligase SMURF1 OS=Homo sapiens OX=9606 GN=SMURF1 PE=1 SV=2	10	86.1	7.02
O43175	D-3-phosphoglycerate dehydrogenase OS=Homo sapiens OX=9606 GN=PHGDH PE=1 SV=4	15	56.6	6.71
A0A6Q8PHS7	Phosphatidylinositol-3,5-bisphosphate 3-phosphatase OS=Homo sapiens OX=9606 GN=MTMR2 PE=1 SV=1	12	61	7.93
B4E2V3	cDNA FLJ56606, highly similar to Serine/threonine-protein kinase TAO2 OS=Homo sapiens OX=9606 PE=2 SV=1	12	93.9	8.05
H7BZJ3	Protein disulfide-isomerase A3 (Fragment) OS=Homo sapiens OX=9606 GN=PDIA3 PE=1 SV=1	41	13.5	7.3
Q6SPF0	Atherin OS=Homo sapiens OX=9606 GN=SAMD1 PE=1 SV=1	17	56	7.58
E5KNW2	DNA polymerase subunit gamma-1 OS=Homo sapiens OX=9606 PE=3 SV=1	8	139.5	6.86
B3KMX6	cDNA FLJ12864 fis, clone NT2RP2003604, highly similar to Alpha-catulin OS=Homo sapiens OX=9606 PE=2 SV=1	12	81.8	6.55
Q71RH4	FP1047 OS=Homo sapiens OX=9606 PE=2 SV=1	12	69.4	7.21
A0A2R8YGB3	Rho GTPase-activating protein 26 OS=Homo sapiens OX=9606 GN=ARHGAP26 PE=1 SV=1	15	78.4	6.98
Q9NYJ8	TGF-beta-activated kinase 1 and MAP3K7-binding protein 2 OS=Homo sapiens OX=9606 GN=TAB2 PE=1 SV=1	11	76.4	8.54
B3KMW0	Conserved oligomeric Golgi complex subunit 5 OS=Homo sapiens OX=9606 PE=2 SV=1	19	51.8	6.55
Q9H6X2	Anthrax toxin receptor 1 OS=Homo sapiens OX=9606 GN=ANTXR1 PE=1 SV=2	10	62.7	7.61
A0A0A0MSB8	Exocyst complex component 7 OS=Homo sapiens OX=9606 GN=EXOC7 PE=1 SV=1	17	78.8	6.55
A8K883	cDNA FLJ77590, highly similar to Homo sapiens leucine rich repeat containing 1, mRNA OS=Homo sapiens OX=9606 PE=2 SV=1	11	59.2	5.02
Q01804	OTU domain-containing protein 4 OS=Homo sapiens OX=9606 GN=OTUD4 PE=1 SV=4	6	124	6.71
A0A024RDY3	Lysosomal-associated membrane protein 1, isoform CRA_a OS=Homo sapiens OX=9606 GN=LAMP1 PE=3 SV=1	10	44.9	8.75
Q9NZJ4	Sacsin OS=Homo sapiens OX=9606 GN=SACS PE=1 SV=2	2	520.8	7.05
Q5VWQ8	Disabled homolog 2-interacting protein OS=Homo sapiens OX=9606 GN=DAB2IP PE=1 SV=2	9	131.5	8.72
J3QTR3	Ubiquitin-40S ribosomal protein S27a (Fragment) OS=Homo sapiens OX=9606 GN=RPS27A PE=1 SV=1	32	12.2	10.14
Q96HR8	H/ACA ribonucleoprotein complex non-core subunit NAF1 OS=Homo sapiens OX=9606 GN=NAF1 PE=1 SV=2	8	53.7	4.87
B3KTC3	cDNA FLJ38059 fis, clone CTONG2014946, highly similar to Gigaxonin OS=Homo sapiens OX=9606 PE=2 SV=1	11	67.6	5.94
Q8IZL8	Proline-, glutamic acid- and leucine-rich protein 1 OS=Homo sapiens OX=9606 GN=PELP1 PE=1 SV=2	10	119.6	4.34
A0A1W2PR28	IQ motif and SEC7 domain-containing protein 2 OS=Homo sapiens OX=9606 GN=IQSEC2 PE=1 SV=1	11	127.9	6.96
Q6N069	N-alpha-acetyltransferase 16, NatA auxiliary subunit OS=Homo sapiens OX=9606 GN=NAA16 PE=1 SV=2	7	101.4	7.87
H7BY36	RNA-binding protein EWS (Fragment) OS=Homo sapiens OX=9606 GN=EWSR1 PE=1 SV=1	19	32.2	9.82
Q8NFG4	Folliculin OS=Homo sapiens OX=9606 GN=FLCN PE=1 SV=1	14	64.4	6.23
Q8N684	Cleavage and polyadenylation specificity factor subunit 7 OS=Homo sapiens OX=9606 GN=CPSF7 PE=1 SV=1	13	52	8
B7Z4C7	cDNA FLJ57321, moderately similar to Moesin OS=Homo sapiens OX=9606 PE=2 SV=1	19	23.9	6.2
O95391	Pre-mRNA-splicing factor SLU7 OS=Homo sapiens OX=9606 GN=SLU7 PE=1 SV=2	12	68.3	7.14
Q15648	Mediator of RNA polymerase II transcription subunit 1 OS=Homo sapiens OX=9606 GN=MED1 PE=1 SV=4	5	168.4	8.73
Q9NS87	Kinesin-like protein KIF15 OS=Homo sapiens OX=9606 GN=KIF15 PE=1 SV=1	6	160.1	6
E7EX17	Eukaryotic translation initiation factor 4B OS=Homo sapiens OX=9606 GN=EIF4B PE=1 SV=1	9	69.7	5.67
A0A0A0MSI8	Exocyst complex component 5 OS=Homo sapiens OX=9606 GN=EXOC5 PE=1 SV=1	14	82.1	6.87
Q53F87	Sarcosine dehydrogenase variant (Fragment) OS=Homo sapiens OX=9606 PE=2 SV=1	10	100.9	7.33
Q9ULX3	RNA-binding protein NOB1 OS=Homo sapiens OX=9606 GN=NOB1 PE=1 SV=1	15	46.6	7.18
Q14807	Kinesin-like protein KIF22 OS=Homo sapiens OX=9606 GN=KIF22 PE=1 SV=5	14	73.2	9.45
Q86YS7	C2 domain-containing protein 5 OS=Homo sapiens OX=9606 GN=C2CD5 PE=1 SV=1	10	110.4	5.69
Q6P2P2	Protein arginine N-methyltransferase 9 OS=Homo sapiens OX=9606 GN=PRMT9 PE=1 SV=1	11	94.4	5.25
B7Z2Z1	cDNA FLJ59523, highly similar to Scaffold attachment factor B OS=Homo sapiens OX=9606 PE=2 SV=1	10	91	7.24
Q8IXW5	Putative RNA polymerase II subunit B1 CTD phosphatase RPAP2 OS=Homo sapiens OX=9606 GN=RPAP2 PE=1 SV=1	11	69.5	7.78
Q53GZ2	Polymerase (RNA) III (DNA directed) polypeptide E variant (Fragment) OS=Homo sapiens OX=9606 PE=2 SV=1	12	79.9	6.55
Q12899	Tripartite motif-containing protein 26 OS=Homo sapiens OX=9606 GN=TRIM26 PE=1 SV=1	15	62.1	5.03
Q02413	Desmoglein-1 OS=Homo sapiens OX=9606 GN=DSG1 PE=1 SV=2	11	113.7	5.03
O60271	C-Jun-amino-terminal kinase-interacting protein 4 OS=Homo sapiens OX=9606 GN=SPAG9 PE=1 SV=4	7	146.1	5.15
Q9Y4E6	WD repeat-containing protein 7 OS=Homo sapiens OX=9606 GN=WDR7 PE=1 SV=2	4	163.7	6.92
A0A024RBE8	Phosphate carrier protein, mitochondrial OS=Homo sapiens OX=9606 GN=SLC25A3 PE=2 SV=1	22	39.9	9.36
A0A1B0GTL5	Rab11 family-interacting protein 5 OS=Homo sapiens OX=9606 GN=RAB11FIP5 PE=1 SV=1	5	138.3	5.21
Q8NEY1	Neuron navigator 1 OS=Homo sapiens OX=9606 GN=NAV1 PE=1 SV=2	4	202.3	8.07
Q13608	Peroxisome assembly factor 2 OS=Homo sapiens OX=9606 GN=PEX6 PE=1 SV=2	10	104	6.34
A0A5H1ZRP4	Negative elongation factor B OS=Homo sapiens OX=9606 GN=NELFB PE=1 SV=1	12	70	6.04
Q6NUM9	All-trans-retinol 13,14-reductase OS=Homo sapiens OX=9606 GN=RETSAT PE=1 SV=2	13	66.8	8.28
B4DHR1	cDNA FLJ53009, highly similar to Calreticulin OS=Homo sapiens OX=9606 PE=2 SV=1	31	24.3	5.11
O75976	Carboxypeptidase D OS=Homo sapiens OX=9606 GN=CPD PE=1 SV=2	6	152.8	6.05
A0A1U9X8E4	RGL2 OS=Homo sapiens OX=9606 PE=4 SV=1	8	83.6	6.1
Q4VB24	Histone cluster 1, H1e OS=Homo sapiens OX=9606 GN=HIST1H1E PE=2 SV=1	16	21.9	11.03
P43686	26S proteasome regulatory subunit 6B OS=Homo sapiens OX=9606 GN=PSMC4 PE=1 SV=2	18	47.3	5.21
Q8NFA0	Ubiquitin carboxyl-terminal hydrolase 32 OS=Homo sapiens OX=9606 GN=USP32 PE=1 SV=1	5	181.5	6.44
P12259	Coagulation factor V OS=Homo sapiens OX=9606 GN=F5 PE=1 SV=4	2	251.5	6.05
A0A024R5T1	Transcription factor 12 (HTF4, helix-loop-helix transcription factors 4), isoform CRA_c OS=Homo sapiens OX=9606 GN=TCF12 PE=4 SV=1	9	72.9	7.02
Q9NYV4	Cyclin-dependent kinase 12 OS=Homo sapiens OX=9606 GN=CDK12 PE=1 SV=2	5	164.1	9.44
Q92738	USP6 N-terminal-like protein OS=Homo sapiens OX=9606 GN=USP6NL PE=1 SV=3	9	94	9.07
Q86US8	Telomerase-binding protein EST1A OS=Homo sapiens OX=9606 GN=SMG6 PE=1 SV=2	4	160.4	7.05
B0QZ18	Copine-1 OS=Homo sapiens OX=9606 GN=CPNE1 PE=1 SV=1	9	59.7	6.04
Q5T760	Serine/arginine-rich-splicing factor 11 (Fragment) OS=Homo sapiens OX=9606 GN=SRSF11 PE=1 SV=1	19	42.3	11.65
Q6P3S6	F-box only protein 42 OS=Homo sapiens OX=9606 GN=FBXO42 PE=1 SV=1	10	77.8	7.43
Q8NFI3	Cytosolic endo-beta-N-acetylglucosaminidase OS=Homo sapiens OX=9606 GN=ENGASE PE=1 SV=1	7	83.9	6.79
P27694	Replication protein A 70 kDa DNA-binding subunit OS=Homo sapiens OX=9606 GN=RPA1 PE=1 SV=2	14	68.1	7.21
B4DGI3	TNF receptor-associated factor OS=Homo sapiens OX=9606 PE=2 SV=1	15	50.6	7.44
A0A3F2YNW7	AT-rich interactive domain-containing protein 1B OS=Homo sapiens OX=9606 GN=ARID1B PE=1 SV=1	2	245.3	6.86
A0A024R704	SFRS protein kinase 2, isoform CRA_b OS=Homo sapiens OX=9606 GN=SRPK2 PE=4 SV=1	15	77.5	4.97
B4DJT9	Amyloid-beta A4 protein OS=Homo sapiens OX=9606 PE=2 SV=1	18	75.1	4.83
B4DMA8	Kinesin-like protein OS=Homo sapiens OX=9606 PE=2 SV=1	11	60.5	6.7
Q7Z4Q2	HEAT repeat-containing protein 3 OS=Homo sapiens OX=9606 GN=HEATR3 PE=1 SV=2	14	74.5	5.11
A0A6Q8PHR6	Tripartite motif-containing protein 2 OS=Homo sapiens OX=9606 GN=TRIM2 PE=1 SV=1	12	70.7	7.91
A0A2X0SFV3	ARHGAP35 (Fragment) OS=Homo sapiens OX=9606 GN=ARHGAP35 PE=4 SV=1	4	170.6	6.64
Q13469	Nuclear factor of activated T-cells, cytoplasmic 2 OS=Homo sapiens OX=9606 GN=NFATC2 PE=1 SV=2	10	100.1	7.28
Q05D78	Double-strand break repair protein MRE11 (Fragment) OS=Homo sapiens OX=9606 GN=MRE11A PE=2 SV=1	18	59.7	6.92
Q9NQT8	Kinesin-like protein KIF13B OS=Homo sapiens OX=9606 GN=KIF13B PE=1 SV=2	5	202.7	5.88
A8K8W7	Hormone-sensitive lipase OS=Homo sapiens OX=9606 PE=2 SV=1	7	116.5	6.7
A2RTX5	Threonine--tRNA ligase 2, cytoplasmic OS=Homo sapiens OX=9606 GN=TARS3 PE=1 SV=1	7	92.6	6.05
P29350	Tyrosine-protein phosphatase non-receptor type 6 OS=Homo sapiens OX=9606 GN=PTPN6 PE=1 SV=1	16	67.5	7.78
A0A0J9YWL0	Beta/gamma crystallin domain-containing protein 1 OS=Homo sapiens OX=9606 GN=CRYBG1 PE=1 SV=1	4	231.6	5.81
Q9C0B7	Transport and Golgi organization protein 6 homolog OS=Homo sapiens OX=9606 GN=TANGO6 PE=1 SV=2	9	120.7	6.11
A0A024R9G7	ATPase family, AAA domain containing 2, isoform CRA_c OS=Homo sapiens OX=9606 GN=ATAD2 PE=4 SV=1	8	158.5	6.32
A0A024R2U4	Three prime repair exonuclease 1, isoform CRA_b OS=Homo sapiens OX=9606 GN=TREX1 PE=4 SV=1	11	85.8	6.32
B3KSS4	cDNA FLJ36858 fis, clone ASTRO2015185, highly similar to POLIOVIRUS RECEPTOR OS=Homo sapiens OX=9606 PE=2 SV=1	17	39.6	6.67
O00462	Beta-mannosidase OS=Homo sapiens OX=9606 GN=MANBA PE=1 SV=3	11	100.8	5.52
B3KN49	cDNA FLJ13562 fis, clone PLACE1008080, highly similar to Homo sapiens hexamethylene bis-acetamide inducible 1 (HEXIM1), mRNA OS=Homo sapiens OX=9606 PE=2 SV=1	12	40.6	4.89
P42338	Phosphatidylinositol 4,5-bisphosphate 3-kinase catalytic subunit beta isoform OS=Homo sapiens OX=9606 GN=PIK3CB PE=1 SV=1	10	122.7	7.09
O60684	Importin subunit alpha-7 OS=Homo sapiens OX=9606 GN=KPNA6 PE=1 SV=1	12	60	4.98
Q6P432	Peptidyl-prolyl cis-trans isomerase (Fragment) OS=Homo sapiens OX=9606 GN=PPIG PE=2 SV=1	23	27.5	9.5
A0A140TA32	C4a anaphylatoxin OS=Homo sapiens OX=9606 GN=C4A PE=1 SV=1	3	187.6	7.12
A8K1Y7	cDNA FLJ77273, highly similar to Homo sapiens centaurin, delta 3 (CENTD3), mRNA OS=Homo sapiens OX=9606 PE=2 SV=1	5	169.6	7.08
P10586	Receptor-type tyrosine-protein phosphatase F OS=Homo sapiens OX=9606 GN=PTPRF PE=1 SV=2	6	212.7	6.3
Q05DF2	SF3A2 protein (Fragment) OS=Homo sapiens OX=9606 GN=SF3A2 PE=2 SV=1	14	51.4	10.11
Q14644	Ras GTPase-activating protein 3 OS=Homo sapiens OX=9606 GN=RASA3 PE=1 SV=3	9	95.6	7.15
M0QXN5	Nuclear pore glycoprotein p62 OS=Homo sapiens OX=9606 GN=NUP62 PE=1 SV=1	15	45.6	5.38
A0A024R059	3-hydroxy-3-methylglutaryl coenzyme A synthase OS=Homo sapiens OX=9606 GN=HMGCS1 PE=3 SV=1	10	57.3	5.41
Q5TC82	Roquin-1 OS=Homo sapiens OX=9606 GN=RC3H1 PE=1 SV=1	7	125.7	7.27
B4DDB3	Phosphorylase b kinase regulatory subunit OS=Homo sapiens OX=9606 PE=2 SV=1	13	54.9	6.15
O43278	Kunitz-type protease inhibitor 1 OS=Homo sapiens OX=9606 GN=SPINT1 PE=1 SV=2	13	58.4	6.29
Q9HAU0	Pleckstrin homology domain-containing family A member 5 OS=Homo sapiens OX=9606 GN=PLEKHA5 PE=1 SV=1	8	127.4	7.53
F8W7U0	Intersectin-1 OS=Homo sapiens OX=9606 GN=ITSN1 PE=1 SV=1	5	129.9	7.71
Q9H981	Actin-related protein 8 OS=Homo sapiens OX=9606 GN=ACTR8 PE=1 SV=2	9	70.4	7.78
X2JEV0	RecQ protein-like 4 (Fragment) OS=Homo sapiens OX=9606 GN=RECQL4 PE=2 SV=1	7	109.2	7.06
Q99856	AT-rich interactive domain-containing protein 3A OS=Homo sapiens OX=9606 GN=ARID3A PE=1 SV=2	11	62.9	4.91
A0A087WUV8	Basigin OS=Homo sapiens OX=9606 GN=BSG PE=1 SV=1	35	20.5	6.68
Q8WWQ0	PH-interacting protein OS=Homo sapiens OX=9606 GN=PHIP PE=1 SV=2	8	206.6	8.85
E9PN48	ADP-ribosylation factor GTPase-activating protein 2 (Fragment) OS=Homo sapiens OX=9606 GN=ARFGAP2 PE=1 SV=1	26	27.1	9.19
Q59G94	Zinc finger protein 207 variant (Fragment) OS=Homo sapiens OX=9606 PE=2 SV=1	12	52.8	9.01
A0A024R7E0	BTB (POZ) domain containing 14B, isoform CRA_a OS=Homo sapiens OX=9606 GN=BTBD14B PE=4 SV=1	14	57.2	5.74
A0A024R3P9	Acyl-Coenzyme A binding domain containing 3, isoform CRA_a OS=Homo sapiens OX=9606 GN=ACBD3 PE=4 SV=1	12	60.6	5.06
W5RWE6	PX domain-containing protein kinase-like protein OS=Homo sapiens OX=9606 GN=PXK PE=1 SV=1	11	63.1	9.35
B4DSN5	Tyrosine-protein phosphatase non-receptor type OS=Homo sapiens OX=9606 GN=PTPN1 PE=1 SV=1	12	41.2	5.97
A0A7P0T8N8	Transcription elongation regulator 1 OS=Homo sapiens OX=9606 GN=TCERG1 PE=4 SV=1	9	125.9	8.92
P42892	Endothelin-converting enzyme 1 OS=Homo sapiens OX=9606 GN=ECE1 PE=1 SV=2	10	87.1	5.88
Q9NYB9	Abl interactor 2 OS=Homo sapiens OX=9606 GN=ABI2 PE=1 SV=1	15	55.6	6.16
A0A024R6L5	Tyrosyl-DNA phosphodiesterase 1, isoform CRA_a OS=Homo sapiens OX=9606 GN=TDP1 PE=3 SV=1	10	68.4	7.65
O00154	Cytosolic acyl coenzyme A thioester hydrolase OS=Homo sapiens OX=9606 GN=ACOT7 PE=1 SV=3	19	41.8	8.54
A4ZVS8	Protein inhibitor of activated STAT1 OS=Homo sapiens OX=9606 GN=PIAS1 PE=2 SV=1	12	71.8	7.3
Q9UJY5	ADP-ribosylation factor-binding protein GGA1 OS=Homo sapiens OX=9606 GN=GGA1 PE=1 SV=1	17	70.3	5.29
Q96DP0	Complex I-9kD OS=Homo sapiens OX=9606 PE=2 SV=1	25	49.2	8.98
Q8WXI9	Transcriptional repressor p66-beta OS=Homo sapiens OX=9606 GN=GATAD2B PE=1 SV=1	11	65.2	9.7
Q1WIR0	Phosphatidylinositol-4,5-bisphosphate 3-kinase OS=Homo sapiens OX=9606 PE=2 SV=1	5	119.4	7.18
E7EX44	Caldesmon OS=Homo sapiens OX=9606 GN=CALD1 PE=1 SV=1	11	64.1	7.02
B3KWP7	cDNA FLJ43538 fis, clone PLACE7008431, highly similar to Homo sapiens phosphatidylinositol-4-phosphate 5-kinase, type II, gamma (PIP5K2C), mRNA OS=Homo sapiens OX=9606 PE=2 SV=1	14	40.2	6.21
Q6ZMZ3	Nesprin-3 OS=Homo sapiens OX=9606 GN=SYNE3 PE=1 SV=2	7	112.1	6.23
Q6NSJ5	Volume-regulated anion channel subunit LRRC8E OS=Homo sapiens OX=9606 GN=LRRC8E PE=1 SV=2	12	90.2	6.96
Q96HA7	Tonsoku-like protein OS=Homo sapiens OX=9606 GN=TONSL PE=1 SV=2	9	150.8	6.42
A0A024R7N1	GEM interacting protein, isoform CRA_b OS=Homo sapiens OX=9606 GN=GMIP PE=4 SV=1	5	106.6	5.72
B4DHC2	cDNA FLJ56434, highly similar to p130Cas-associated protein OS=Homo sapiens OX=9606 PE=2 SV=1	10	111	9.41
A8K7A0	DNA primase large subunit OS=Homo sapiens OX=9606 PE=2 SV=1	9	58.8	7.91
Q6FI30	Nuclear factor 1 OS=Homo sapiens OX=9606 GN=NFIC PE=2 SV=1	15	54.6	8.31
Q99569	Plakophilin-4 OS=Homo sapiens OX=9606 GN=PKP4 PE=1 SV=2	5	131.8	8.94
A0A024R0J5	AP complex subunit beta OS=Homo sapiens OX=9606 GN=hCG_38636 PE=3 SV=1	9	83.2	5.86
Q96RT8	Gamma-tubulin complex component 5 OS=Homo sapiens OX=9606 GN=TUBGCP5 PE=1 SV=1	6	118.2	5.9
O94913	Pre-mRNA cleavage complex 2 protein Pcf11 OS=Homo sapiens OX=9606 GN=PCF11 PE=1 SV=3	4	172.9	8.48
Q8N3D4	EH domain-binding protein 1-like protein 1 OS=Homo sapiens OX=9606 GN=EHBP1L1 PE=1 SV=2	3	161.8	4.83
A0A088QF11	Choline transporter-like protein 2 isoform 2 OS=Homo sapiens OX=9606 GN=SLC44A2 PE=3 SV=1	10	79.9	8.57
F5H3P7	Protein phosphatase 1 regulatory subunit 37 (Fragment) OS=Homo sapiens OX=9606 GN=PPP1R37 PE=1 SV=8	22	20.4	5.29
Q6I9V5	ADP/ATP translocase OS=Homo sapiens OX=9606 GN=SLC25A6 PE=2 SV=1	27	32.8	9.74
A0A0C4DG33	Peroxin-1 OS=Homo sapiens OX=9606 GN=PEX1 PE=1 SV=1	5	136.5	6.47
Q9UPW5	Cytosolic carboxypeptidase 1 OS=Homo sapiens OX=9606 GN=AGTPBP1 PE=1 SV=3	6	138.4	6.15
A0A024R4R3	CCR4-NOT transcription complex, subunit 3, isoform CRA_a OS=Homo sapiens OX=9606 GN=CNOT3 PE=3 SV=1	11	81.8	6.2
Q8TF46	DIS3-like exonuclease 1 OS=Homo sapiens OX=9606 GN=DIS3L PE=1 SV=2	8	120.7	6.54
A0A088AWN3	Dedicator of cytokinesis protein 9 OS=Homo sapiens OX=9606 GN=DOCK9 PE=1 SV=2	3	237.8	7.4
Q86XZ4	Spermatogenesis-associated serine-rich protein 2 OS=Homo sapiens OX=9606 GN=SPATS2 PE=1 SV=1	10	59.5	8.9
A0A6Q8PHE5	Ubiquitin-protein ligase E3A OS=Homo sapiens OX=9606 GN=UBE3A PE=1 SV=1	9	93.5	5.14
P19823	Inter-alpha-trypsin inhibitor heavy chain H2 OS=Homo sapiens OX=9606 GN=ITIH2 PE=1 SV=2	5	106.4	6.86
Q9NZW5	Protein PALS2 OS=Homo sapiens OX=9606 GN=PALS2 PE=1 SV=2	16	61.1	6.18
O00232	26S proteasome non-ATPase regulatory subunit 12 OS=Homo sapiens OX=9606 GN=PSMD12 PE=1 SV=3	14	52.9	7.65
Q9H9T3	Elongator complex protein 3 OS=Homo sapiens OX=9606 GN=ELP3 PE=1 SV=2	13	62.2	8.88
Q53F79	PAP associated domain containing protein 5 variant (Fragment) OS=Homo sapiens OX=9606 PE=2 SV=1	20	51.8	8.63
Q53GM7	Connector enhancer of kinase suppressor of Ras 1 variant (Fragment) OS=Homo sapiens OX=9606 GN=CNKSR1 PE=2 SV=1	11	78.7	5.4
A8K6V6	N-acetylglucosamine-6-sulfatase OS=Homo sapiens OX=9606 PE=2 SV=1	9	62.1	8.4
B4DLH6	cDNA FLJ58151, moderately similar to R3H domain-containing protein 1 OS=Homo sapiens OX=9606 PE=2 SV=1	5	90.2	9.31
V9HWF4	Phosphoglycerate kinase OS=Homo sapiens OX=9606 GN=HEL-S-68p PE=2 SV=1	16	44.6	8.1
O43299	AP-5 complex subunit zeta-1 OS=Homo sapiens OX=9606 GN=AP5Z1 PE=1 SV=2	10	88.5	7.01
A0A0C4DGG8	Cell division cycle and apoptosis regulator protein 1 (Fragment) OS=Homo sapiens OX=9606 GN=CCAR1 PE=1 SV=1	2	120.4	5.92
Q13363	C-terminal-binding protein 1 OS=Homo sapiens OX=9606 GN=CTBP1 PE=1 SV=2	16	47.5	6.77
P13473	Lysosome-associated membrane glycoprotein 2 OS=Homo sapiens OX=9606 GN=LAMP2 PE=1 SV=2	11	44.9	5.63
Q4LE53	Receptor protein-tyrosine kinase (Fragment) OS=Homo sapiens OX=9606 GN=EPHB2 variant protein PE=2 SV=1	7	111.4	5.72
Q53ET0	CREB-regulated transcription coactivator 2 OS=Homo sapiens OX=9606 GN=CRTC2 PE=1 SV=2	9	73.3	7.11
B1AKL4	Eukaryotic translation initiation factor 4E transporter OS=Homo sapiens OX=9606 GN=EIF4ENIF1 PE=1 SV=1	7	105.5	8.32
P17980	26S proteasome regulatory subunit 6A OS=Homo sapiens OX=9606 GN=PSMC3 PE=1 SV=3	17	49.2	5.24
X6RAJ1	A-kinase anchor protein 17A OS=Homo sapiens OX=9606 GN=AKAP17A PE=1 SV=1	17	51.5	9.39
A0A087X0M4	Kanadaptin OS=Homo sapiens OX=9606 GN=SLC4A1AP PE=1 SV=1	8	82.8	5.1
P05141	ADP/ATP translocase 2 OS=Homo sapiens OX=9606 GN=SLC25A5 PE=1 SV=7	21	32.8	9.69
P23497	Nuclear autoantigen Sp-100 OS=Homo sapiens OX=9606 GN=SP100 PE=1 SV=3	7	100.4	8.22
L7RRS0	Phosphatidylinositol-4-phosphate 3-kinase OS=Homo sapiens OX=9606 GN=PIK3C2A PE=3 SV=1	5	190.6	8.02
B2R950	cDNA, FLJ94213, highly similar to Homo sapiens pregnancy-zone protein (PZP), mRNA OS=Homo sapiens OX=9606 PE=2 SV=1	3	163.8	6.38
Q6DT37	Serine/threonine-protein kinase MRCK gamma OS=Homo sapiens OX=9606 GN=CDC42BPG PE=1 SV=2	4	172.4	6.28
Q8NF37	Lysophosphatidylcholine acyltransferase 1 OS=Homo sapiens OX=9606 GN=LPCAT1 PE=1 SV=2	15	59.1	6.02
Q15910	Histone-lysine N-methyltransferase EZH2 OS=Homo sapiens OX=9606 GN=EZH2 PE=1 SV=2	9	85.3	7.02
S4R341	Nucleolar and coiled-body phosphoprotein 1 OS=Homo sapiens OX=9606 GN=NOLC1 PE=1 SV=1	67	8	5.26
Q92878	DNA repair protein RAD50 OS=Homo sapiens OX=9606 GN=RAD50 PE=1 SV=1	6	153.8	6.89
A0A024R394	Cysteine and histidine-rich domain (CHORD)-containing 1, isoform CRA_c OS=Homo sapiens OX=9606 GN=CHORDC1 PE=4 SV=1	22	37.5	7.72
A0A140VK07	Testicular secretory protein Li 7 OS=Homo sapiens OX=9606 PE=2 SV=1	10	73.9	6.35
Q6UX04	Spliceosome-associated protein CWC27 homolog OS=Homo sapiens OX=9606 GN=CWC27 PE=1 SV=1	12	53.8	5.8
E5RIA4	Aspartyl aminopeptidase OS=Homo sapiens OX=9606 GN=DNPEP PE=1 SV=1	15	52	7.42
Q7KZY0	Matrix metalloproteinase 15 (Membrane-inserted) OS=Homo sapiens OX=9606 PE=2 SV=1	10	64.4	8.43
G3V599	Melanoma inhibitory activity protein 2 OS=Homo sapiens OX=9606 GN=MIA2 PE=1 SV=1	4	151.6	4.7
Q5VTL8	Pre-mRNA-splicing factor 38B OS=Homo sapiens OX=9606 GN=PRPF38B PE=1 SV=1	13	64.4	10.54
O15260	Surfeit locus protein 4 OS=Homo sapiens OX=9606 GN=SURF4 PE=1 SV=3	17	30.4	7.78
Q9UPU7	TBC1 domain family member 2B OS=Homo sapiens OX=9606 GN=TBC1D2B PE=1 SV=2	9	109.8	6.16
A0A3B3ISF0	La-related protein 1B OS=Homo sapiens OX=9606 GN=LARP1B PE=1 SV=1	3	126.1	7.87
A0A0S2Z693	Methylcrotonoyl-CoA carboxylase 1 isoform 1 (Fragment) OS=Homo sapiens OX=9606 GN=MCCC1 PE=2 SV=1	8	80.4	7.78
Q15262	Receptor-type tyrosine-protein phosphatase kappa OS=Homo sapiens OX=9606 GN=PTPRK PE=1 SV=2	7	162	5.9
P08047	Transcription factor Sp1 OS=Homo sapiens OX=9606 GN=SP1 PE=1 SV=3	5	80.6	7.34
O15037	Protein KHNYN OS=Homo sapiens OX=9606 GN=KHNYN PE=1 SV=3	11	74.5	7.02
Q14966	Zinc finger protein 638 OS=Homo sapiens OX=9606 GN=ZNF638 PE=1 SV=2	3	220.5	6.38
O14802	DNA-directed RNA polymerase III subunit RPC1 OS=Homo sapiens OX=9606 GN=POLR3A PE=1 SV=2	4	155.5	8.48
Q9UIU6	Homeobox protein SIX4 OS=Homo sapiens OX=9606 GN=SIX4 PE=1 SV=2	10	82.9	5.71
Q9BPU6	Dihydropyrimidinase-related protein 5 OS=Homo sapiens OX=9606 GN=DPYSL5 PE=1 SV=1	18	61.4	7.2
Q9UPN4	Centrosomal protein of 131 kDa OS=Homo sapiens OX=9606 GN=CEP131 PE=1 SV=3	7	122.1	8.69
A0A494C1J1	Cytospin-A OS=Homo sapiens OX=9606 GN=SPECC1L PE=1 SV=1	6	126.2	5.57
A0A024RAS3	RNA helicase OS=Homo sapiens OX=9606 GN=hCG_27698 PE=3 SV=1	15	50.6	9.1
Q6P158	Putative ATP-dependent RNA helicase DHX57 OS=Homo sapiens OX=9606 GN=DHX57 PE=1 SV=2	6	155.5	7.71
Q561W4	Protein phosphatase 1, regulatory (Inhibitor) subunit 8 OS=Homo sapiens OX=9606 GN=PPP1R8 PE=2 SV=1	19	38.5	7.37
A2A2F0	Ral GTPase-activating protein subunit beta (Fragment) OS=Homo sapiens OX=9606 GN=RALGAPB PE=1 SV=1	4	147.3	6.76
Q6NSJ2	Pleckstrin homology-like domain family B member 3 OS=Homo sapiens OX=9606 GN=PHLDB3 PE=1 SV=3	5	71.9	6.57
A0A087WTF0	Protein tyrosine phosphatase domain-containing protein 1 OS=Homo sapiens OX=9606 GN=PTPDC1 PE=1 SV=1	7	90.2	8.31
C9J2R5	Lipoma-preferred partner (Fragment) OS=Homo sapiens OX=9606 GN=LPP PE=1 SV=8	81	5.6	9.99
O43524	Forkhead box protein O3 OS=Homo sapiens OX=9606 GN=FOXO3 PE=1 SV=1	7	71.2	5.16
A0A024R2L6	40S ribosomal protein SA OS=Homo sapiens OX=9606 GN=RPSA PE=3 SV=1	21	32.8	4.87
O15068	Guanine nucleotide exchange factor DBS OS=Homo sapiens OX=9606 GN=MCF2L PE=1 SV=2	6	128	6.43
O75691	Small subunit processome component 20 homolog OS=Homo sapiens OX=9606 GN=UTP20 PE=1 SV=3	2	318.2	7.39
Q8N448	Ligand of Numb protein X 2 OS=Homo sapiens OX=9606 GN=LNX2 PE=1 SV=1	9	76	6.64
Q86XK2	F-box only protein 11 OS=Homo sapiens OX=9606 GN=FBXO11 PE=1 SV=3	7	103.5	6.99
B7Z2B0	Calcium/calmodulin-dependent protein kinase OS=Homo sapiens OX=9606 PE=2 SV=1	11	60	7.27
B4DLV7	Rab GDP dissociation inhibitor OS=Homo sapiens OX=9606 PE=2 SV=1	13	51.1	8.18
A0A087X0R7	SENP3-EIF4A1 readthrough (NMD candidate) (Fragment) OS=Homo sapiens OX=9606 GN=SENP3-EIF4A1 PE=3 SV=1	13	61.2	7.85
A0A024R0W3	Solute carrier family 38, member 2, isoform CRA_b OS=Homo sapiens OX=9606 GN=SLC38A2 PE=4 SV=1	7	56	8
O43660	Pleiotropic regulator 1 OS=Homo sapiens OX=9606 GN=PLRG1 PE=1 SV=1	9	57.2	9.17
E9PMQ6	Heat shock factor protein 1 OS=Homo sapiens OX=9606 GN=HSF1 PE=1 SV=2	12	53.6	6.7
O60287	Nucleolar pre-ribosomal-associated protein 1 OS=Homo sapiens OX=9606 GN=URB1 PE=1 SV=4	4	254.2	6.47
E9PC52	Histone-binding protein RBBP7 OS=Homo sapiens OX=9606 GN=RBBP7 PE=1 SV=1	20	46.9	5.07
A0A024R254	Melanoma antigen family D, 1, isoform CRA_a OS=Homo sapiens OX=9606 GN=MAGED1 PE=4 SV=1	9	86.1	5.83
O43684	Mitotic checkpoint protein BUB3 OS=Homo sapiens OX=9606 GN=BUB3 PE=1 SV=1	24	37.1	6.84
P08236	Beta-glucuronidase OS=Homo sapiens OX=9606 GN=GUSB PE=1 SV=2	10	74.7	7.02
Q5T0W9	Protein FAM83B OS=Homo sapiens OX=9606 GN=FAM83B PE=1 SV=1	7	114.7	8.97
Q8TDW0	Volume-regulated anion channel subunit LRRC8C OS=Homo sapiens OX=9606 GN=LRRC8C PE=1 SV=2	12	92.4	7.62
B4DYE2	cDNA FLJ61467, highly similar to Chromosome-associated kinesin KIF4A OS=Homo sapiens OX=9606 PE=2 SV=1	7	139.8	6.13
G5E9G4	Tetratricopeptide repeat domain 7A, isoform CRA_a OS=Homo sapiens OX=9606 GN=TTC7A PE=1 SV=1	8	92.7	6.62
A0A068F7M9	FH1/FH2 domain-containing protein 1 variant OS=Homo sapiens OX=9606 GN=FHOD1 PE=2 SV=1	7	129.2	6.37
B4DVV7	Methionine--tRNA ligase OS=Homo sapiens OX=9606 PE=2 SV=1	8	58.4	8.28
Q68CZ6	HAUS augmin-like complex subunit 3 OS=Homo sapiens OX=9606 GN=HAUS3 PE=1 SV=1	9	69.6	5.55
B7Z5V6	cDNA FLJ57046, highly similar to Lysosomal alpha-glucosidase OS=Homo sapiens OX=9606 PE=2 SV=1	9	71.7	6.34
B3LEU8	TMEM214 protein (Fragment) OS=Homo sapiens OX=9606 GN=TMEM214 PE=2 SV=1	10	75.4	8.98
Q8WUH2	Transforming growth factor-beta receptor-associated protein 1 OS=Homo sapiens OX=9606 GN=TGFBRAP1 PE=1 SV=1	8	97.1	6.55
A0A024R0S8	X-ray repair complementing defective repair in Chinese hamster cells 1, isoform CRA_b OS=Homo sapiens OX=9606 GN=XRCC1 PE=4 SV=1	15	69.5	6.39
Q8N1N4	Keratin, type II cytoskeletal 78 OS=Homo sapiens OX=9606 GN=KRT78 PE=1 SV=2	12	56.8	6.02
Q6UVJ0	Spindle assembly abnormal protein 6 homolog OS=Homo sapiens OX=9606 GN=SASS6 PE=1 SV=1	12	74.4	7.55
Q9Y2U5	Mitogen-activated protein kinase kinase kinase 2 OS=Homo sapiens OX=9606 GN=MAP3K2 PE=1 SV=2	10	69.7	8
O96005	Cleft lip and palate transmembrane protein 1 OS=Homo sapiens OX=9606 GN=CLPTM1 PE=1 SV=1	8	76	6.3
Q9H4A4	Aminopeptidase B OS=Homo sapiens OX=9606 GN=RNPEP PE=1 SV=2	11	72.5	5.74
H0Y8B3	Adenosylhomocysteinase 3 (Fragment) OS=Homo sapiens OX=9606 GN=AHCYL2 PE=1 SV=1	7	58.1	8.05
F8W9X7	Coiled-coil domain-containing protein 93 OS=Homo sapiens OX=9606 GN=CCDC93 PE=1 SV=1	13	73	7.99
Q15058	Kinesin-like protein KIF14 OS=Homo sapiens OX=9606 GN=KIF14 PE=1 SV=1	5	186.4	7.91
A0A6I8PU89	DnaJ homolog subfamily C member 7 OS=Homo sapiens OX=9606 GN=DNAJC7 PE=1 SV=1	16	39.5	7.21
Q53F19	Nuclear cap-binding protein subunit 3 OS=Homo sapiens OX=9606 GN=NCBP3 PE=1 SV=2	10	70.5	5.73
A0A494C0W0	Poly(A)-specific ribonuclease PARN OS=Homo sapiens OX=9606 GN=PARN PE=1 SV=1	11	76.3	6.18
Q0VFW7	C14orf102 protein OS=Homo sapiens OX=9606 GN=C14orf102 PE=2 SV=1	9	106.7	6.21
A8K860	DNA polymerase OS=Homo sapiens OX=9606 PE=2 SV=1	10	53.5	7.91
Q13470	Non-receptor tyrosine-protein kinase TNK1 OS=Homo sapiens OX=9606 GN=TNK1 PE=1 SV=3	8	72.4	9.48
[truncated: 1,620 more rows]
