# Supplementary material for: A paracrine-to-autocrine shunt of GREM1 fuels colorectal cancer metastasis via ACVR1C
Source: Mol Cancer. 2026 Jan 24;25:174. doi: 10.1186/s12943-025-02554-w (PMC13371181; doi:10.1186/s12943-025-02554-w)
Supplement: Supplementary file 2 — Supplementary Material 2. [file 12943_2025_2554_MOESM2_ESM.xlsx]

## Sheet: RNA-seq gene_fpkm 293
gene_id	G-CM1	G-CM2	G-CM3	V-CM1	V-CM2	V-CM3
ENSG00000223972	0	0.0315633	0	0	0.0329243	0.151
ENSG00000227232	7.24881	4.86416	4.82036	7.24475	6.42694	4.03353
ENSG00000278267	13.7159	6.44263	7.06494	14.144	10.0806	13.0993
ENSG00000243485	0.285468	0.053636	0.0522816	0.0554124	0	0.0513194
ENSG00000284332	0	0	0	0	0	0
ENSG00000237613	0	0	0	0	0	0
ENSG00000268020	0	0	0	0	0	0
ENSG00000240361	0	0	0	0	0	0
ENSG00000186092	0	0	0	0	0	0
ENSG00000238009	0	0	0.0573049	0	0	0
ENSG00000239945	0	0	0	0	0	0
ENSG00000233750	0.0152918	0	0	0	0	0
ENSG00000268903	0.308835	0.0725329	0.0707014	0.224806	0	0.1388
ENSG00000269981	0.205255	0.38565	0.187956	0.199212	0.402279	0.184497
ENSG00000239906	0	0	0	0.175158	0	0
ENSG00000241860	0.0752769	0.0265193	0.0258497	0.0456627	0.0553256	0.0422898
ENSG00000222623	0	0	0	0	0	0
ENSG00000241599	0	0	0	0	0	0
ENSG00000279928	0	0	0	0	0.300651	0.0919247
ENSG00000279457	13.3943	12.6616	10.546	12.676	10.0999	10.6144
ENSG00000273874	0	0.805329	0	0.832001	0	0
ENSG00000228463	0.184291	0.146495	0.253137	0.185743	0.257001	0.165652
ENSG00000236679	0.454227	0.995679	0.277296	0.293902	1.48373	0.952675
ENSG00000236601	0	0	0	0	0	0
ENSG00000237094	0.253691	0.176539	0.137665	0.191505	0.174943	0.135131
ENSG00000269732	0	0	0	0	0	0
ENSG00000284733	0	0	0	0	0	0
ENSG00000233653	0	0	0	0	0	0
ENSG00000250575	0.376384	0.220994	0.0430828	0.136988	0.0461046	0.126869
ENSG00000278757	0	0	0	0	0	0
ENSG00000230021	0.243991	0.249146	0.18457	0.0823674	0.301471	0.181173
ENSG00000235146	0	0	0	0	0	0
ENSG00000225972	0	0	0	0	0.153558	0.281705
ENSG00000225630	184.76	178.24	231.056	215.574	195.172	246.076
ENSG00000237973	19.0027	14.1253	14.2876	26.1431	15.5489	14.4661
ENSG00000278791	0	0	0	0	0	0
ENSG00000229344	0	0.0802967	0	0.165912	0.167518	0.0768286
ENSG00000240409	0	0.264552	0	0	0	0
ENSG00000248527	463.858	383.497	427.899	538.262	473.43	510.045
ENSG00000198744	0.319703	0.50057	0.48793	0.620579	0.313292	0.67053
ENSG00000268663	0	0.258313	0.377685	0	0	0.123578
ENSG00000284662	0	0	0	0	0	0
ENSG00000229376	0.284933	0.156145	0.108716	0.230452	0.13961	0.149401
ENSG00000228327	2.04821	1.64321	1.49383	1.94392	1.26113	1.43375
ENSG00000223181	0	0	0	0.544001	0	0
ENSG00000229905	0	0	0	0	0	0
ENSG00000237491	0.887542	0.53601	0.657932	0.728095	0.538414	0.797781
ENSG00000285268	0	0	0	0	0	0
ENSG00000230092	0.534794	0.376805	0.673366	0.389285	0.720596	0.480707
ENSG00000177757	0.209578	0.0843796	0.109665	0.0581162	0.0880179	0.0538234
ENSG00000228794	3.47785	2.72944	2.6267	2.74218	2.91349	2.83841
ENSG00000225880	1.54916	1.37218	1.86443	1.37467	2.21208	1.98926
ENSG00000230368	0	0	0	0	0.0289821	0
ENSG00000234711	0	0	0.0504533	0.106949	0.0539921	0.148574
ENSG00000283040	0.0696446	0	0	0	0	0
ENSG00000272438	1.99291	2.34027	1.67286	4.51319	2.44118	2.68703
ENSG00000230699	2.01141	1.31372	0.947254	2.6215	1.50177	1.13645
ENSG00000241180	0	0	0.120496	0.255422	0	0
ENSG00000223764	20.8488	13.3345	10.1565	22.5787	16.7436	13.1624
ENSG00000187634	19.7014	13.776	12.1981	28.0028	20.033	16.7656
ENSG00000188976	32.0246	53.9615	53.6494	40.448	59.8772	61.4027
ENSG00000187961	15.3329	10.9363	9.11933	14.2982	10.4152	8.22611
ENSG00000187583	0.576135	0.425264	0.395683	0.459319	0.564582	0.628839
ENSG00000187642	0.272395	0.0799684	0.187078	0.330468	0.183516	0.290755
ENSG00000272512	11.9883	7.8757	4.88758	9.3299	7.36637	6.02843
ENSG00000188290	133.739	86.9928	80.0693	130.763	85.7876	48.3197
ENSG00000187608	15.4869	7.27449	8.11188	12.1449	8.68085	10.8024
ENSG00000231702	6.81341	3.2004	0.34662	4.7759	0.741865	2.38169
ENSG00000224969	11.51	4.65073	4.64663	5.52548	4.97255	3.89363
ENSG00000188157	28.1763	20.3004	17.6939	25.5849	21.4944	18.8587
ENSG00000242590	0	0	0	0	0	0
ENSG00000217801	1.90639	1.28645	1.91783	1.74601	1.42086	1.35156
ENSG00000273443	0.351583	0.264233	0.837074	0.136492	0.275627	0.758462
ENSG00000237330	0.091944	0.028792	0	0.0892367	0	0.110194
ENSG00000131591	6.62038	5.60443	4.70301	6.64917	5.83706	5.09716
ENSG00000285812	2.34235	1.15026	1.36496	1.6017	0.991186	1.14843
ENSG00000223823	0	0	0	0	0	0
ENSG00000207730	0	0	0	0	0	0
ENSG00000207607	0	0	0	0	0	0
ENSG00000198976	0	0	0	0	0	0
ENSG00000272141	0	0	0	0	0	0
ENSG00000205231	0	0	0	0.0320363	0	0
ENSG00000162571	0.0147838	0	0	0	0	0
ENSG00000186891	0.212746	0.079945	0	0	0.0833922	0.0382461
ENSG00000186827	0	0	0	0	0.132768	0.0304457
ENSG00000078808	34.7725	36.2485	38.7226	36.2356	36.7804	36.9751
ENSG00000176022	19.5826	19.583	17.3066	20.111	20.6099	19.1093
ENSG00000184163	1.55967	1.00733	0.357054	0.977625	0.573147	0.700965
ENSG00000260179	0.411565	0.140597	0.102785	0.290506	0.219988	0.369941
ENSG00000160087	19.3236	24.9057	23.937	20.9639	24.2824	22.7291
ENSG00000230415	3.74981	2.24173	1.56081	3.41883	1.22487	1.22566
ENSG00000162572	3.83789	1.93199	1.25989	3.03613	1.30568	1.15859
ENSG00000131584	12.487	8.69086	5.53247	10.3981	7.74272	6.17416
ENSG00000278073	0	0	0	0	0	0
ENSG00000169972	11.6398	15.2912	14.3475	11.4789	14.6883	14.6308
ENSG00000127054	18.2678	17.2681	16.5788	17.0623	16.3518	16.6817
ENSG00000283712	0	0	0	0	0	0
ENSG00000240731	17.2159	11.6335	8.85049	14.657	14.7989	13.3029
ENSG00000224051	11.4259	10.7339	11.1729	11.0673	10.7498	10.3933
ENSG00000169962	0.832023	0.590215	0.404273	0.708643	0.499187	0.457883
ENSG00000107404	34.9388	31.4446	29.4049	33.2425	30.2692	31.2404
ENSG00000284372	0	0	0	0	0	0
ENSG00000162576	10.5899	4.8382	3.09489	7.07591	3.83242	3.25493
ENSG00000175756	55.219	85.5723	88.8167	65.1523	87.3454	99.4572
ENSG00000223663	0	0.596865	0	0.616633	0.15565	0.428314
ENSG00000221978	53.9185	39.0212	32.7446	48.1351	38.6189	33.5877
ENSG00000224870	18.1688	14.8129	14.6714	15.7293	14.2753	14.6712
ENSG00000242485	20.3229	35.9844	35.1141	23.8439	34.8725	35.5954
ENSG00000264293	0	0	0	0	0	0
ENSG00000272455	2.83234	2.84059	3.15441	2.82323	2.5505	3.78443
ENSG00000235098	0.110235	0.0828477	0.0605668	0.149785	0.064815	0.0792694
ENSG00000225905	0.322058	0	0	0.208383	0.3156	0
ENSG00000205116	0.236961	0	0	0.344976	0.348315	0
ENSG00000225285	0.205497	0	0.0627257	0.265928	0.134251	0.0615712
ENSG00000179403	2.42838	1.98939	1.7073	2.32336	2.22179	1.75864
ENSG00000215915	0.146611	0.0413197	0.0268509	0.199212	0.172405	0.105427
ENSG00000160072	9.21207	12.8031	10.291	8.97028	12.3884	10.8382
ENSG00000284740	1.5898	2.4892	0.889659	1.11438	1.55792	1.34962
ENSG00000197785	33.0115	47.7141	43.7264	34.6388	46.8678	43.6045
ENSG00000205090	1.09826	1.03175	1.0057	0.942935	0.910667	0.797347
ENSG00000160075	15.6401	22.1659	20.265	18.186	22.8742	20.2249
ENSG00000215014	0.943004	1.18897	1.31801	1.03566	1.24023	1.18222
ENSG00000274481	0	0	0	0	0	0
ENSG00000228594	9.03045	6.06719	7.39889	9.76853	6.21922	6.68471
ENSG00000272106	3.51815	3.57379	3.71928	4.60826	3.72789	3.67654
ENSG00000197530	7.52676	4.71605	4.11595	7.00828	4.7565	4.23743
ENSG00000189409	0.41033	0.216833	0.0704525	0.273795	0.376971	0.184416
ENSG00000248333	22.5115	22.8438	22.0527	17.6476	22.1092	19.2734
ENSG00000272004	1.31158	1.23215	0.533795	0.14144	0.999664	0.523971
ENSG00000189339	16.2552	10.8872	10.4216	15.6283	10.0979	9.63058
ENSG00000269737	2.17916	1.41497	1.26186	1.52404	1.94704	1.037
ENSG00000215914	0.0573181	0	0.0524873	0.0556304	0.0561688	0.257606
ENSG00000008128	0.868002	0.559156	0.397423	0.794304	0.571115	0.445838
ENSG00000268575	1.4576	0.743966	0.7462	0.657214	0.517363	0.453922
ENSG00000227775	0.612716	0.456518	0.52238	0.348602	0.351976	0.360835
ENSG00000215790	2.72833	1.3845	1.59177	2.05384	1.46642	1.49454
ENSG00000008130	24.0496	20.676	19.7801	23.1281	21.7931	20.0746
ENSG00000078369	62.344	72.2996	68.8935	66.4066	69.4884	64.0001
ENSG00000231050	0.450384	0.725329	0.589178	0.562014	0.378302	0.404834
ENSG00000169885	0.376729	0.0943772	0.091994	0.0487515	0.196893	0.0903009
ENSG00000178821	0.548549	0.961948	0.636268	0.56789	0.609223	0.591686
ENSG00000142609	0.0335593	0.0367815	0.0409745	0.0597138	0.0602917	0.0653581
ENSG00000233542	0	0	0	0	0	0
ENSG00000187730	0.178361	0.0887079	0.153721	0.203658	0.133659	0.103738
ENSG00000226969	0.10835	0.305366	0.0992185	0.21032	0	0.292177
ENSG00000067606	3.25968	2.81127	2.88708	3.04515	2.94745	2.48399
ENSG00000271806	0.0833544	0.0652554	0.0508861	0.0539333	0.0408415	0.0249748
ENSG00000182873	2.58854	1.92647	2.18567	1.89239	1.94365	2.5987
ENSG00000162585	3.51913	3.34112	3.35945	3.24965	3.11365	3.56642
ENSG00000234396	0.357623	0	0	0.173546	0	0
ENSG00000157933	40.1912	36.9736	34.3894	36.7372	36.5291	34.5493
ENSG00000116151	1.28031	1.34768	1.4502	1.39731	1.63757	1.38191
ENSG00000272161	0	0	0	0.114759	0.115869	0.106282
ENSG00000269896	2.44601	2.27513	2.50598	2.77357	2.53936	1.74149
ENSG00000272420	0.410511	0.192825	0.281934	0.298817	0.301709	0.737987
ENSG00000157916	17.2389	21.0351	19.8942	17.278	19.2721	18.9756
ENSG00000157911	4.09232	6.43158	5.5366	5.39033	6.04555	6.0155
ENSG00000149527	0.129767	0.157465	0.11883	0.183672	0.132464	0.0923425
ENSG00000224387	0	0.120357	0.703906	0	0	0.115158
ENSG00000229393	0.793867	0.213083	0.519256	0.550351	0.222271	1.0194
ENSG00000157881	10.2956	8.27815	7.81827	10.2473	8.18768	7.3358
ENSG00000197921	0	0	0	0	0	0
ENSG00000272449	3.08406	1.53807	1.35977	2.66066	1.86557	2.22457
ENSG00000238164	0.13298	0.0713865	0.00869799	0.0460942	0.0651565	0.102455
ENSG00000157873	0.093733	0.0352226	0.0257499	0.0545838	0.027556	0.025276
ENSG00000225931	0	0	0	0	0	0
ENSG00000228037	0.279357	0.0874798	0	0.180754	0	0.251104
ENSG00000157870	5.77565	4.87354	3.6262	5.26992	4.25335	4.47652
ENSG00000142606	0	0	0	0	0	0
ENSG00000237058	0	0	0	0	0.153146	0
ENSG00000215912	0.244704	0.136688	0.133237	0.295269	0.181468	0.196177
ENSG00000285945	0	0	0	0	0	0
ENSG00000283259	0	0	0	0	0	0
ENSG00000233234	0	0	0	0	0	0
ENSG00000231630	0	0.510605	0.124428	0.131879	0	0.122138
ENSG00000284745	0	0	0	0	0	0
ENSG00000169717	0	0	0	0	0	0
ENSG00000177133	1.02012	0.440055	0.305026	0.525349	0.377424	0.336838
ENSG00000142611	2.69171	1.15502	0.803398	2.45026	1.24576	0.895906
ENSG00000283572	1.91123	0	0	0	0	0
ENSG00000226286	0	0	0	0	0	0
ENSG00000279839	0	0	0	0.0211341	0	0
ENSG00000272235	0	0.0158227	0	0.0490402	0.016505	0
ENSG00000130762	2.35769	1.48645	1.76556	2.29843	2.38229	2.3453
ENSG00000272088	0	0	0	0.148105	0	0
ENSG00000162591	0.322973	0.186716	0.144085	0.385801	0.170421	0.19354
ENSG00000207776	0	0	0	0	0	0
ENSG00000238260	1.21833	0.616296	1.02983	1.27342	1.46942	0.842397
ENSG00000158109	11.4702	15.5848	14.4173	12.7495	16.6591	16.1055
ENSG00000116213	9.43689	8.28925	7.9957	9.43431	9.35283	8.62719
ENSG00000078900	4.92164	4.2592	4.71205	5.3623	4.80605	4.63307
ENSG00000227589	0	0	0	0.450208	0.303043	0
ENSG00000235131	0.498227	0.156018	0.456235	0.161185	0	0.298559
ENSG00000227372	9.14557	9.47234	9.02406	7.96066	8.80909	8.69594
ENSG00000276189	0	0	0	0	0	0
ENSG00000162592	0.0272077	0.03834	0.0872011	0.0132033	0.0533243	0.0489121
ENSG00000235169	0.594215	0.614053	0.761788	1.09577	0.81522	0.961415
ENSG00000130764	18.1228	22.6398	22.931	19.6062	24.8177	22.741
ENSG00000266075	0.981356	0.73754	1.07837	0.380984	0.577006	1.23495
ENSG00000272153	4.83027	2.6814	3.71948	3.19639	3.65763	3.55235
ENSG00000116198	10.0361	10.513	10.6068	9.89148	11.242	10.9105
ENSG00000169598	7.65183	7.89597	6.73106	6.78328	7.32127	7.94757
ENSG00000198912	7.24007	6.62689	6.64203	6.93663	7.14696	6.92578
ENSG00000236423	0.94668	0.525524	0.74868	0.960568	0.955809	0.99276
ENSG00000233304	0.0149698	0	0	0	0	0
ENSG00000226374	0.0314754	0	0	0	0	0
ENSG00000284668	0	0	0	0	0.0936453	0
ENSG00000284703	0.0121014	0.0113686	0	0	0	0.0108775
ENSG00000229280	0	0	0	0	0	0
ENSG00000235054	0	0	0	0	0	0
ENSG00000284694	0	0	0	0	0	0
ENSG00000227169	0	0	0	0	0	0
ENSG00000232596	0	0	0	0	0	0
ENSG00000196581	0	0	0	0	0	0
ENSG00000284739	0	0	0	0	0	0
ENSG00000284674	0	0	0	0	0	0
ENSG00000231510	0	0	0	0	0	0
ENSG00000284616	0	0	0	0	0	0
ENSG00000284692	0	0	0	0	0	0
ENSG00000284666	0	0	0	0	0	0
ENSG00000260972	0	0	0	0	0	0
ENSG00000283356	0	0	0	0	0	0
ENSG00000236948	0	0	0.0487484	0	0	0
ENSG00000264341	0	0	0	0	0	0
ENSG00000264101	0.83275	0	0	0	0	0
ENSG00000131697	2.56333	2.05042	1.8608	2.68551	2.06074	2.03349
ENSG00000069424	1.47352	1.11432	1.01899	1.13342	1.16836	0.895818
ENSG00000116254	0.111988	0.127354	0.0809599	0.131572	0.132846	0.18543
ENSG00000285629	0	0	0	0	0	0
ENSG00000116251	28.3743	25.3928	23.8965	27.4059	24.743	25.0011
ENSG00000226944	0.154213	0	0.847294	0.449016	0.151121	0
ENSG00000158286	2.04489	0.956366	0.680924	1.73552	0.624586	0.620649
ENSG00000116237	50.8368	52.2975	51.0204	53.3613	52.4816	50.9244
ENSG00000225077	0.296654	0.464481	0.498028	0.383892	0.314931	0.622188
ENSG00000173673	0	0.157137	0	0	0	0
ENSG00000158292	4.64112	2.87093	2.37998	3.10462	2.68685	2.34901
ENSG00000097021	17.1174	24.5262	26.2756	23.3219	28.9081	30.9631
ENSG00000271746	0	0	0	0	0	0
ENSG00000069812	0.161714	0.0506402	0.0493615	0.167416	0.137342	0.0290718
ENSG00000187017	0.03354	0.0157544	0	0.0244143	0.0164337	0.0376849
ENSG00000265392	0	0	0	0	0	0
ENSG00000231868	0.166076	0	0	0	0	0
ENSG00000215788	1.56517	0.818303	0.847492	1.41341	0.893599	0.636154
ENSG00000171680	3.17373	1.65382	1.36987	2.33427	1.80612	1.18865
ENSG00000162408	5.25136	7.90686	8.13173	5.46134	7.80917	7.83837
ENSG00000253022	0.525158	0	0	0.509694	0.514627	0
ENSG00000229519	0.290736	0.273129	0.133116	0.705437	0.569812	0.130666
ENSG00000173662	0.120939	0.113615	0.0369153	0.136941	0.0592569	0.0181179
ENSG00000204859	5.91599	6.70088	6.28274	4.67384	6.39358	5.25949
ENSG00000162413	8.75951	11.7286	11.7109	9.93627	13.1862	12.6342
ENSG00000116273	22.1546	20.7386	18.6343	21.7636	19.9878	18.9461
ENSG00000041988	4.85294	4.63974	4.79787	4.40438	4.23658	4.67096
ENSG00000007923	14.8856	16.6129	16.4035	16.0835	19.3184	16.9572
ENSG00000228750	0	0	0	0	0	0
ENSG00000284744	0	0	0	0	0	0
ENSG00000237436	2.94974	1.97936	2.82976	2.4539	2.20236	3.28271
ENSG00000171735	5.86818	5.86759	5.42681	5.56005	5.74482	5.59327
ENSG00000227950	0	0	0	0	0.199733	0
ENSG00000237365	0	0	0	0	0	0
ENSG00000207056	0	0	0	0	0	0
ENSG00000237402	0	0	0	0	0	0
ENSG00000237728	0	0	0	0	0	0
ENSG00000225126	0	0	0	0.15672	0	0
ENSG00000270171	0.474198	0.12728	0.0310166	0.0657479	0	0.0304457
ENSG00000270035	1.12494	0.480371	0.936483	0.496281	0.400868	0.735398
ENSG00000269978	4.36648	0.82041	1.19954	1.90706	1.28368	2.15868
ENSG00000049245	37.9535	48.9488	52.9154	44.8714	47.8928	54.2386
ENSG00000269925	1.6316	1.11476	1.90156	2.01543	2.18029	1.86656
ENSG00000049246	1.25236	1.18328	0.909542	1.36218	1.03682	0.996315
ENSG00000236266	0.210696	0.131957	0.128625	0.136328	0	0.252516
ENSG00000049247	0.0325475	0	0	0.0315891	0	0
ENSG00000049249	0.478789	0.138398	0.126472	0.169791	0.0270685	0.0331051
ENSG00000270330	0	0	0	0	0	0
ENSG00000116288	69.4792	94.172	97.3614	85.8436	96.5168	107.986
ENSG00000200344	0	1.59502	3.62774	0.549282	0	1.01742
ENSG00000284747	0.623146	0.625323	0.635471	0.604798	0.430231	0.585585
ENSG00000284716	0.0558893	0.157514	0.0511789	0.0542436	0.0547686	0
ENSG00000116285	9.10734	9.22299	9.48743	9.79877	10.6578	11.1403
ENSG00000238290	0.0285188	0	0	0.0276791	0	0.0256346
ENSG00000232848	0	0	0	0	0	0
ENSG00000229305	0	0	0	0	0.0531383	0
ENSG00000227634	0	0	0	0	0	0
ENSG00000200975	0	0	0	0	0	0
ENSG00000233645	0	0	0	0	0	0
ENSG00000251977	0	0	0	0	0	0
ENSG00000162426	0.625716	0.246506	0.166349	0.587702	0.276915	0.217716
ENSG00000252254	0	0	0	0	0	0
ENSG00000142599	16.2366	14.1964	12.3437	15.6995	14.4758	13.7882
ENSG00000232912	0	0	0	0.322371	0	0.0746397
ENSG00000221083	0	0	0	0	0	0
ENSG00000270282	0	0	0	0	0	0
ENSG00000234619	0.0885905	0	0	0	0	0
ENSG00000224315	0	0	0	0	0	0
ENSG00000222511	0	0.531673	0.518248	0.549282	0.554598	0
ENSG00000226545	0	0	0.514502	0	0	0
ENSG00000228423	0	0	0	0	0	0
ENSG00000229716	0	0	0	0	0	0
ENSG00000074800	266.968	466.445	498.587	319.168	481.112	534.518
ENSG00000274258	0	0	0	0.635686	0	0
ENSG00000230679	0.127834	0.240186	0.585302	0.248141	0.250542	0.689436
ENSG00000201725	0	0	0	1.0575	0	0
ENSG00000238249	0	0	0	0	0	0.070521
ENSG00000232208	0	0	0	0	0	0.148855
ENSG00000232663	0	0	0	0	0	0
ENSG00000131686	0	0	0.0401048	0	0	0
ENSG00000265141	0	0	0	0	0	0
ENSG00000197241	0.0378769	0	0	0.0735232	0	0
ENSG00000142583	0.0261284	0.00818203	0	0	0.00853483	0
ENSG00000252404	0	0	0	0	0	0
ENSG00000180758	4.01494	3.23151	3.2294	4.29692	4.00886	3.85273
ENSG00000228526	2.10341	0.799221	0.932394	2.165	1.26693	1.23436
ENSG00000284357	0	0	0	0	0	0
ENSG00000234546	1.50817	0.362446	0.321177	1.3276	0.515556	0.441371
ENSG00000049239	8.32393	5.59902	6.05323	7.86032	5.79142	5.47525
ENSG00000171621	2.74076	2.22075	2.66662	2.34417	2.53472	2.74072
ENSG00000284652	0.0660538	0.124107	0.0907301	0.256435	0.0647293	0.17812
ENSG00000284693	0.177789	0.271411	0.183155	0.237261	0.239558	0.259688
ENSG00000252956	0	0	0	0	0	0
ENSG00000235263	0.0823341	0	0	0	0	0
ENSG00000171612	11.8128	11.751	11.5374	11.6264	12.2725	10.1694
ENSG00000231181	0.72996	0.489824	1.81433	0.809676	1.12408	0.843603
ENSG00000188807	10.1087	10.3063	9.8851	10.7694	11.4149	10.2372
ENSG00000171608	2.36595	1.18485	0.977894	1.37598	0.884099	1.1585
ENSG00000179840	0	0	0	0	0	0
ENSG00000233268	0	0	0	0	0	0
ENSG00000231789	5.77338	3.38255	4.71832	5.54313	3.83258	4.96629
ENSG00000171603	39.0087	37.4172	34.8662	38.3479	35.6533	35.1004
ENSG00000271264	0	0	0.21699	0	0	0
ENSG00000280113	0	0	0	0.0285305	0	0
ENSG00000178585	8.11801	7.38037	8.05729	8.45507	6.92874	6.59083
ENSG00000223989	0	0	0	0	0	0
ENSG00000285701	0.0764994	0.0718666	0	0.0742468	0	0
ENSG00000162441	12.8102	11.6228	12.3992	12.433	12.2875	12.321
ENSG00000228150	1.19235	1.12014	0.970537	0.514328	1.81757	0.952675
ENSG00000173614	1.60589	1.4136	1.85265	1.6936	1.75956	1.82992
ENSG00000202415	0.182735	0.515006	0.83667	0.177354	0.358142	0.492763
ENSG00000283611	0.656447	0	0.120224	0.382271	0.128657	0.118011
ENSG00000265521	0	0.702081	0	0	0	0
ENSG00000241326	0	0	0	0	0	0
ENSG00000162444	18.3476	15.4556	14.0734	19.253	15.9893	18.1351
ENSG00000130939	11.048	11.8848	11.8361	10.3942	11.9779	11.1189
ENSG00000224340	0	0	0.158396	0	0.169506	0.466443
ENSG00000233623	0	0.0805329	0.0784993	0.0832001	0	0
ENSG00000201746	0.54479	0	0	1.0575	0	1.46908
ENSG00000054523	10.6716	9.90481	9.74508	9.89443	9.78387	9.28777
ENSG00000264881	0	0	0	0	0	0
ENSG00000199562	0	0.511798	0	0.528748	0.533866	0
ENSG00000264501	0	0	0	0	0	0
ENSG00000284735	0.269306	0.275997	0.179352	0.522753	0.16794	0.286082
ENSG00000284642	0.74987	0.370767	0.542108	0.72779	0.85086	1.41901
ENSG00000142657	72.0304	99.813	92.2714	72.6943	91.1551	89.0892
ENSG00000271989	0	0.274842	0.0669756	0.0709863	0.358367	0
ENSG00000251503	0.571495	0.0976156	0.190301	0.0756365	0.101825	0.0700496
ENSG00000175279	0.603373	0.787268	1.19713	1.10615	0.788365	1.17509
ENSG00000241563	0.619036	0.387698	0.33067	0.951279	0.505519	0.834644
ENSG00000160049	17.7554	15.3404	16.5975	15.5409	15.5964	16.5215
ENSG00000203469	0	0	0	0	0	0
ENSG00000142655	9.0115	10.6051	10.1056	10.2763	10.8144	10.3045
ENSG00000243267	0.208188	0.782319	0.571924	0	0	0.187132
ENSG00000130940	1.14158	1.3478	1.36557	1.25769	1.00279	1.02613
ENSG00000272078	0.161862	0.0622064	0.0808475	0.0642667	0.0504689	0.0991994
ENSG00000225158	0	0	0	0	0	0
ENSG00000175262	0.0652589	0	0.0149397	0.0158343	0.0159876	0.0146647
ENSG00000215785	0	0	0.108056	0.458106	0	0
ENSG00000120948	30.3225	33.2759	36.3308	30.0354	33.7228	36.8445
ENSG00000277726	0	0	0	0	0	0
ENSG00000009724	1.37127	1.62316	1.20547	1.17118	1.39752	1.03537
ENSG00000271895	2.4121	2.14014	2.45423	2.47114	2.4294	1.8068
ENSG00000116649	35.9645	84.2498	75.7945	50.4356	79.4253	86.0494
ENSG00000171824	21.6448	23.8006	22.8528	22.1008	24.1988	21.8125
ENSG00000226849	0.260817	0.102092	0.0796116	0.0632842	0.149092	0.214902
ENSG00000230337	0.761283	2.04337	1.89219	2.74436	1.38546	2.44389
ENSG00000198793	19.8172	18.9199	18.3452	17.9966	18.0765	15.8155
ENSG00000225602	0.152798	0.28709	0.20988	0.0741495	0.149734	0.0686725
ENSG00000253086	0	0	0	0	0	0
ENSG00000171819	0	0.0489386	0	0.0505595	0	0
ENSG00000207451	0	0	0	0	0	0
ENSG00000238173	0	0	0	0.754348	0	0
ENSG00000120942	6.71018	8.74991	8.88609	7.55906	8.96983	9.36178
ENSG00000238199	0.266785	1.00251	0.7329	0.258929	0.653588	1.19902
ENSG00000284646	0	0.0738037	0	0	0	0
ENSG00000224338	0	0	0	0	0	0
ENSG00000204624	0.142362	0.124825	0.104291	0.13817	0.148808	0.170619
ENSG00000285833	0	0	0	0	0	0
ENSG00000235643	0.136091	0.12785	0.166162	0.0440281	0.0889084	0.040776
ENSG00000284708	0.0556758	0	0	0	0	0
ENSG00000116661	1.65526	0.416809	0.203142	1.20903	0.484949	0.383468
ENSG00000132879	6.67711	3.86613	3.60202	7.36275	4.11381	4.4568
ENSG00000116663	2.44629	2.44934	2.18116	2.93658	1.73484	2.11209
ENSG00000116670	15.0992	16.4584	17.8895	15.0801	18.3882	17.6706
ENSG00000162490	0.111094	0.0894566	0.0871977	0.146331	0.0933139	0.0855929
ENSG00000177674	9.2885	7.8264	10.5663	10.1535	8.75036	10.7807
ENSG00000215910	0.0269084	0.00842627	0.0082135	0.0696428	0	0.0161247
ENSG00000177553	0	0	0	0	0	0
ENSG00000177000	3.03678	2.16251	2.05889	2.00742	2.07454	1.94225
ENSG00000011021	4.73529	4.05324	3.62438	3.65454	3.56411	3.59613
ENSG00000276470	0	0	0	0	0	0
ENSG00000278852	0	0	0	0	0	0
ENSG00000175206	0.156141	0.586739	0.524263	0.404115	0.459029	0.514614
ENSG00000275915	0	0	0	0	0	0
ENSG00000120937	0	0	0	0	0	0
ENSG00000224904	0.0221056	0	0	0.0214547	0	0
ENSG00000285646	0.474566	0.371522	0.651853	0.230296	0.310033	0.853141
ENSG00000199347	0	0	0	0	0	0
ENSG00000201801	0	0	0.44483	0	0.47603	0
ENSG00000116685	25.6906	32.5636	34.0842	31.2453	34.3334	33.6804
ENSG00000083444	17.6959	17.2419	19.4554	18.9615	18.5974	19.2746
ENSG00000116688	37.3457	50.9852	49.3329	39.7273	51.7708	48.3512
ENSG00000270914	0.626801	0	0	0	0	0
ENSG00000116691	10.6005	10.9098	11.1073	10.7497	10.388	11.3115
ENSG00000202461	2.57932	0.969245	2.83431	2.00269	0.505519	0.463691
ENSG00000276869	0	0	0	0	0	0
ENSG00000243539	0	0	0	0	0	0
ENSG00000120949	0.0311891	0.102551	0.0714012	0.0454062	0.0152819	0.0981219
ENSG00000201135	0	0	0	0	0	0
ENSG00000227875	0	0	0	0	0	0
ENSG00000285604	0	0	0	0	0	0
ENSG00000283789	0	0	0	0	0	0
ENSG00000028137	0.0309573	0	0	0.0150229	0.0151683	0.0278264
ENSG00000263676	0	0	0	0	0	0
ENSG00000225196	0	0.173299	0	0	0	0
ENSG00000252969	0	0	0	0	0	0
ENSG00000048707	5.54913	4.4563	4.32835	5.04793	4.47516	3.8324
ENSG00000239149	0.383503	0.360279	1.05354	0.744422	0.751627	0.344718
ENSG00000229484	0	0	0	0	0.260839	0
ENSG00000162496	8.8514	4.41923	5.15158	8.75848	4.79793	7.16232
ENSG00000221340	0.577154	0	0.52851	2.8008	0.565581	0
ENSG00000276830	4.35019	0.817348	0.79671	0.844419	0	0.782046
ENSG00000272482	0.506891	0.476194	0.309447	0.655955	0.165576	0.759378
ENSG00000204518	0	0	0	0	0	0
ENSG00000226166	0	0	0	0	0	0
ENSG00000188984	0	0	0	0	0	0
ENSG00000157330	0	0	0	0	0.0138717	0
ENSG00000116726	0	0	0	0.0633551	0	0
ENSG00000116721	0.0239002	0	0	0	0.0234209	0
ENSG00000228338	0	0	0	0	0	0
ENSG00000239810	0	0	0	0	0	0
ENSG00000231103	0	0	0	0	0	0
ENSG00000179172	0	0	0	0	0	0
ENSG00000120952	0.0710019	0.100053	0	0	0.0347891	0.0319105
ENSG00000243073	0	0	0	0	0	0
ENSG00000187545	0.0382246	0	0	0	0	0
ENSG00000204510	0.105348	0	0	0.0681639	0	0.157823
ENSG00000207434	0	0	0	0	0	0
ENSG00000234064	0	0	0	0	0	0
ENSG00000232423	0	0	0.0299213	0	0	0
ENSG00000274178	0.0402017	0.0377671	0	0	0	0
ENSG00000274764	0.0312896	0	0	0	0	0
ENSG00000277058	0	0	0	0	0	0
ENSG00000229571	0	0	0	0	0	0
ENSG00000277862	0	0	0	0.0781978	0	0
ENSG00000236179	0	0	0	0	0	0
ENSG00000275774	0.0507775	0	0	0	0	0
ENSG00000229978	0	0	0	0	0	0
ENSG00000233336	0	0	0	0	0	0
ENSG00000280267	0	0	0	0	0	0
ENSG00000179412	0	0	0	0	0	0
ENSG00000204505	0.0312896	0	0	0	0	0
ENSG00000279169	0	0	0	0	0	0
ENSG00000279804	0	0	0	0	0	0
ENSG00000250894	0	0	0	0	0	0
ENSG00000270601	0	0	0	0	0	0.0304634
ENSG00000231219	0	0	0	0	0	0
ENSG00000207511	0	0	0	0	0	0
ENSG00000182330	0.0300942	0	0	0.0292081	0.0294908	0.0811519
ENSG00000237700	0	0	0	0	0	0
ENSG00000204501	0	0	0	0	0	0
ENSG00000228229	0	0	0	0	0	0
ENSG00000204481	0	0.0237994	0	0.0245876	0	0.0227714
ENSG00000204480	0	0	0	0	0	0
ENSG00000204479	0	0	0	0	0	0
ENSG00000204478	0	0	0.0334249	0.0354265	0	0
ENSG00000162494	0	0	0	0	0	0
ENSG00000259961	0	0	0	0	0	0
ENSG00000215909	0	0	0	0	0	0
ENSG00000162493	9.74949	10.8432	11.4189	11.9196	10.3553	11.0392
ENSG00000222952	0	0	0	0	0.565581	0
ENSG00000237445	0.153806	0	0	0.149277	0.150722	0
ENSG00000253085	0	0	0	0	0	0
ENSG00000116731	7.32726	7.26455	6.86609	6.88878	6.74627	7.20022
ENSG00000189337	1.12449	1.41644	1.44238	1.32846	1.51053	1.69975
ENSG00000252151	0	0	0	0	0	0
ENSG00000231606	0	0	0	0	0	0
ENSG00000234593	0	0	0	0	0	0.0685826
ENSG00000235829	0	0	0	0	0	0
ENSG00000175147	0.370205	0.14607	0.250863	0.186838	0.11609	0.186348
ENSG00000171729	4.91843	4.54723	5.19497	4.89989	4.38628	4.93562
ENSG00000204464	0	0	0	0	0	0.187467
ENSG00000215720	0	0	0	0	0	0
ENSG00000278480	0.181033	0	0	0.0585674	0	0
ENSG00000142621	0.177541	0.124022	0.104216	0.194404	0.120448	0.0859304
ENSG00000233485	0	0	0	0	0	0
ENSG00000236045	0	0	0	0	0	0.144146
ENSG00000228140	0.0450309	0.010576	0.0103089	0.0218525	0.0661919	0.0404767
ENSG00000142634	15.6614	22.0045	23.9164	20.6768	23.0887	21.9857
ENSG00000162438	0.0668876	0.0471277	0.0306251	0.0486885	0.0163866	0
ENSG00000142615	0.153502	0.0721031	0.0351412	0.0744912	0	0
ENSG00000215704	0.240052	0.300685	0.0732732	0.271814	0.0784127	0.107887
ENSG00000132906	3.496	2.89973	2.73533	3.4038	2.67784	2.91371
ENSG00000116138	3.43097	2.67321	2.86129	2.99299	3.12202	3.16965
ENSG00000251866	0	0	0.762565	0	0	0
ENSG00000272510	0	0	0	0	0	0
ENSG00000116771	0.279804	0.175239	0.298925	0.701543	0.571236	0.964107
ENSG00000237301	0.0819579	0.0769945	0.0187626	0.139203	0.120472	0.0920863
ENSG00000235084	1.17367	0.122511	0.835921	0.253137	0.38338	0.351658
ENSG00000252417	0	0	0	0	0	0
ENSG00000236500	0	0	0	0	0	0
ENSG00000197312	9.43363	9.79639	9.24993	9.15585	10.167	8.97607
ENSG00000215695	0	0	0	0	0	0
ENSG00000271742	0.227705	0	0.208514	0.663001	0.223139	0.204676
ENSG00000116786	23.1501	22.3327	21.1084	22.743	24.0163	23.224
ENSG00000237938	1.02668	0.643002	0.522305	0.701204	0.670728	0.136718
ENSG00000162461	0.729797	0.5999	0.568045	0.495815	0.661526	0.524791
ENSG00000224459	0	0	0	0	0	0
ENSG00000162460	0	0	0.0351181	0.0372211	0	0
ENSG00000162458	7.16914	5.22541	5.39908	6.71811	5.64453	5.47747
ENSG00000224321	0.356893	0.782319	2.28769	1.38554	0.932631	2.24559
ENSG00000233954	2.27287	2.33619	2.64449	2.07619	2.46313	1.99494
ENSG00000178715	0.266176	0.250056	0.243742	0.258338	0.130419	0.358884
ENSG00000179743	13.2708	15.833	16.5988	11.9192	16.3078	16.3781
ENSG00000065526	38.6132	59.9362	49.3	35.4888	59.4225	46.7451
ENSG00000270620	0	0	0	0	0	0.248327
ENSG00000116809	6.28294	6.03161	5.55198	6.89855	6.08959	5.95646
ENSG00000234607	0.103539	0.0972688	0	0.10049	0	0.0930677
ENSG00000231353	0	0	0	0	0	0
ENSG00000275503	0	0	0	0	0	0
ENSG00000224966	0	0.0569255	0	0.117622	0	0
ENSG00000183888	0	0	0	0.0372334	0.0187969	0
ENSG00000233078	0	0	0	0	0	0
ENSG00000173641	0.0298171	0	0	0.0578783	0	0.0134008
ENSG00000186510	0.03354	0	0	0.0162762	0	0
ENSG00000232456	0.745217	0.233362	0.682409	0.803637	0.243425	0.520994
ENSG00000184908	0.198341	0.242229	0.181625	0.192501	0.0777457	0.231767
ENSG00000185519	3.70111	1.44874	1.82011	3.72517	1.94778	1.72501
ENSG00000142627	9.58694	8.57184	8.30406	8.6925	10.0265	9.1717
ENSG00000227959	0.193449	0.787512	0.354289	0.375505	0.631899	0.695537
ENSG00000224621	0	0.402664	0.0981242	0.104	0.105007	0.0963182
ENSG00000234166	0	0	0	0	0	0
ENSG00000142632	1.07401	0.658025	0.712677	0.664712	0.701652	0.769517
ENSG00000237276	0.556562	0.330225	0.48283	0.341162	0.459286	0.394953
ENSG00000132881	4.45211	3.0837	3.62774	4.13793	3.21667	3.86619
ENSG00000233929	0.626801	0	0.86096	0	0.921349	0.281705
ENSG00000037637	5.58009	5.3336	5.24645	5.36541	5.06127	5.66896
ENSG00000055070	26.2052	30.3287	29.3604	26.5301	30.2646	30.8069
ENSG00000226457	0	0	0.560415	0	0.149931	0
ENSG00000187144	0.0517466	0.0121532	0.0236927	0.0251114	0.0126772	0.0232566
ENSG00000157191	8.8608	9.34871	9.13185	8.05031	8.71395	8.53962
ENSG00000226029	0.718552	0.270015	0.493493	0.679959	0.387279	0.371382
ENSG00000080947	3.05452	1.3986	1.67668	2.2006	1.4589	1.27666
ENSG00000206652	0	0	0.325485	0	0	0.319495
ENSG00000261135	0.0525158	0.148006	0	0.305817	0.0514627	0
ENSG00000285853	0	0.105447	0	0.0363133	0	0.033631
ENSG00000224174	0	0	0	0	0	0
ENSG00000233421	0.761073	0.105923	0.412995	0.273579	0.276226	0.152023
ENSG00000277344	0	0	0	0	0	0
ENSG00000225710	0	0	0	0	0	0
ENSG00000219481	4.42492	4.06727	3.88588	3.66457	3.84504	3.10641
ENSG00000271732	0	0.323082	0.157462	0.834455	0	0.309127
ENSG00000215908	19.9438	14.5844	14.5399	17.1767	13.8071	13.5619
ENSG00000283773	0	0	0	0	0	0
ENSG00000186301	2.74797	2.27081	1.44458	2.37071	1.87004	1.30364
ENSG00000282143	0	0.0670286	0.130672	0	0	0
ENSG00000207513	0	0	0	0	0	0
ENSG00000280114	0	0	0	0	0	0
ENSG00000236698	38.3257	55.5177	63.6873	55.4055	75.1143	65.8878
ENSG00000268869	0.110055	0.0172317	0	0.124617	0.0359494	0.0494623
ENSG00000279151	0	0	0	0	0	0
ENSG00000282740	0.0711752	0.0668649	0.130353	0.138159	0.139496	0.319885
ENSG00000058453	7.73422	4.39531	4.06168	6.08427	4.11476	3.79792
ENSG00000227684	0.152999	0	0	0	0.0749654	0
ENSG00000207389	0	0	0	0	0	0
ENSG00000186715	0.253063	0.134373	0.120905	0.245612	0.161732	0.11868
ENSG00000223643	0	0	0	0	0	0
ENSG00000230239	0	0	0	0	0	0
ENSG00000263811	0	0	0	0	0	0
ENSG00000228549	2.83298	0.813211	0.990845	1.37478	0.732601	1.00798
ENSG00000277234	0	0	0	0	0	0
ENSG00000238142	0.229498	0.4312	0.630467	0.890962	0.112448	0.618863
ENSG00000235241	0.688494	0.646799	0.105078	0.22274	0.449792	0.412576
ENSG00000207005	0.355442	0	0	0	0.348315	0.319495
ENSG00000272426	0.532352	0	0.121871	0	0.260839	0.119628
ENSG00000117122	9.43879	5.50441	5.42036	8.53979	5.95732	5.85985
ENSG00000226526	0.0916549	0	0	0.177912	0.179634	0.0823854
ENSG00000159363	25.4787	26.0103	24.8861	26.0101	25.9574	24.5378
ENSG00000117118	31.3245	41.6167	45.2273	35.7794	44.9657	48.1832
ENSG00000117115	0.467587	0.164726	0.214089	0.425455	0.458211	0.499103
ENSG00000204362	0	0	0	0	0	0
ENSG00000282843	0	0	0.0434687	0	0	0
ENSG00000142623	0.0237783	0.0670149	0.163307	0.0346172	0.046603	0.0641205
ENSG00000142619	0.0365585	0.0343445	0.0836932	0.017741	0.0179127	0
ENSG00000266634	0	0	0	0	0	0
ENSG00000159339	0	0	0.0359337	0	0	0
ENSG00000276747	0	0	0	0.0472254	0	0
ENSG00000227751	0	0	0	0	0	0
ENSG00000179051	105.141	106.114	105.569	99.8103	111.617	107.067
ENSG00000074964	2.52052	1.81444	1.72082	2.45354	1.61498	1.74277
ENSG00000236648	0	0	0	0	0	0
ENSG00000117148	0	0.323168	0.343645	0	0.337103	0.19677
ENSG00000284653	0	0	0	0	0	0
ENSG00000261781	0	0	0	0	0	0
ENSG00000117154	0.113373	0.0177512	0.0519088	0.110035	0.0925829	0.0849224
ENSG00000280222	0	0	0	0	0	0
ENSG00000230035	0	0	0	0	0	0
ENSG00000225387	0	0	0	0	0	0
ENSG00000179023	0.0113299	0	0.010375	0	0.0555137	0
ENSG00000235282	0	0	0	0	0	0
ENSG00000225478	0	0	0	0	0	0
ENSG00000009709	0.86797	0.38168	0.388953	0.627329	0.398137	0.273896
ENSG00000179002	0	0	0	0	0	0.0206125
ENSG00000255275	0.0133423	0	0	0	0	0.0239859
ENSG00000159423	3.55539	4.4089	3.61748	3.328	3.23633	4.01962
ENSG00000265606	0	0	0	0	0	0
ENSG00000221662	0	0	0	0	0.732354	0
ENSG00000169991	2.8826	3.40716	3.50228	2.95315	4.0618	3.07371
ENSG00000272084	0.479774	0.38633	0.376575	0.216193	0.369406	0.308037
ENSG00000127481	19.5655	15.9105	13.6115	15.8917	15.5548	12.3736
ENSG00000230424	2.52946	1.83621	2.52684	1.78544	1.80272	2.27364
ENSG00000127463	10.3283	10.8466	12.1592	10.2711	10.3645	10.9444
ENSG00000053372	19.9748	34.7165	35.9395	22.4139	37.8733	38.026
ENSG00000211454	0.863437	0.573738	0.964226	0.838013	0.495292	0.813972
ENSG00000162482	1.84082	1.98554	1.24864	1.42267	1.57006	1.56272
ENSG00000270728	9.21577	6.46717	7.0156	7.22019	6.85484	6.08804
ENSG00000053371	24.2858	26.9968	27.8137	28.3039	26.0119	26.7722
ENSG00000200403	2.72395	3.58258	6.98424	3.70124	2.13546	2.44846
ENSG00000040487	10.7427	13.0891	13.6728	11.6691	12.9517	13.2651
ENSG00000077549	43.0623	55.3881	55.4567	47.0361	57.3001	57.8342
ENSG00000240490	0	0.190147	0	0	0	0
ENSG00000173436	1.54241	1.06926	1.28578	1.14598	1.20919	1.17607
ENSG00000201609	0	0	0	0	0	0
ENSG00000235185	0	0	0	0.273314	0	0.253126
ENSG00000158747	5.09006	4.49246	4.70559	4.95591	4.98799	5.47867
ENSG00000270136	0	0	0	0	0	0
ENSG00000226396	4.35592	2.88856	3.2849	5.09806	4.01749	3.68507
ENSG00000158748	1.90979	0.938468	0.37667	1.0551	0.921349	0.660246
ENSG00000162542	1.39476	0.999609	0.842696	1.29787	0.789078	1.39588
ENSG00000178828	0	0	0	0	0	0
ENSG00000235434	0	0	0	0	0	0
ENSG00000169914	13.4124	11.1192	10.4992	10.7266	10.9402	10.0737
ENSG00000188784	0	0.209283	0	0	0	0
ENSG00000242688	0	0	0	0	0	0
ENSG00000188257	0	0	0	0	0.0339013	0
ENSG00000127472	0	0	0.0409509	0	0	0
ENSG00000117215	0	0	0	0	0	0
ENSG00000158786	0	0	0	0	0	0
ENSG00000227066	0	0	0	0	0	0
ENSG00000187980	0	0	0	0	0	0
ENSG00000225986	0	0	0	0	0	0
ENSG00000162543	0	0	0	0	0	0
ENSG00000228105	0	0	0	0	0	0
ENSG00000284710	0	0	0.0651367	0	0	0
ENSG00000158816	0.0182821	0.0257624	0.0251119	0.0266157	0	0.00821658
ENSG00000226664	0	0	0	0	0	0
ENSG00000236963	0	0	0	0	0	0
ENSG00000226487	0	0	0	0	0	0
ENSG00000284641	0	0	0	0	0	0
ENSG00000284743	0	0	0	0	0	0
ENSG00000162545	8.55997	3.93702	5.26651	6.29585	4.32523	4.62858
ENSG00000090432	14.9916	18.9355	18.326	16.337	17.6901	19.0848
ENSG00000215520	0	0	0	0	0	0
ENSG00000183114	0.249307	0.149042	0.145279	0.219969	0.177678	0.162977
ENSG00000158825	0.907983	0.341198	0.942318	0.704998	0.415229	0.489693
ENSG00000158828	10.1976	10.452	9.97831	11.5001	10.501	8.35363
ENSG00000284005	0	0	0	0	0	0
ENSG00000117242	1.03649	1.35581	1.24949	1.03143	1.36284	1.50953
ENSG00000244038	74.5527	106.687	105.484	86.0597	102.491	101.54
ENSG00000117245	0.912858	0.441039	0.656795	0.797381	0.447277	0.527488
ENSG00000235432	0	0	0	0.118113	0	0
ENSG00000189410	2.63588	2.1791	1.95512	1.93149	2.42805	2.39299
ENSG00000233069	0	0	0.357054	0	0	0
ENSG00000127483	46.175	36.3954	37.0687	37.4184	35.3012	31.8241
ENSG00000075151	32.5724	30.4058	28.57	30.7525	29.9012	27.9022
ENSG00000251914	0	0	0	0	0	0
ENSG00000221808	0	0	0	0	0	0
ENSG00000233072	0	0	0	0	0	0.136096
ENSG00000236073	0	0	0	0.491966	0	0
ENSG00000235112	0	0	0	0.573406	0	0
ENSG00000117298	11.5106	10.7538	10.475	11.6038	11.4123	11.7041
ENSG00000236936	0	0	0	0.156504	0.0790092	0
ENSG00000231105	0.0705436	0.0662715	0.129196	0.159755	0.069129	0.0634092
ENSG00000236216	0	0	0	0	0	0
ENSG00000228823	0	0	0	0	0	0
ENSG00000236009	0	0	0	0	0	0
ENSG00000227001	1.58739	2.23689	1.53436	0.51355	0.95062	1.50612
ENSG00000187952	0.70858	0.355023	0.129772	0.0916954	0.786954	0.212306
ENSG00000186543	0.140464	0.0659787	0.128625	0.136328	0.0688237	0.126258
ENSG00000142794	4.63807	4.88777	4.66248	4.94999	4.72117	4.44591
ENSG00000176378	0	0.167469	0.32648	0.519047	0.17469	0
ENSG00000162551	0.756039	0.710253	0.923092	0.752592	0.626897	0.836402
ENSG00000233431	0	0	0	0	0	0
ENSG00000076864	0.992644	0.78028	0.936809	1.38614	1.05215	1.33838
ENSG00000090686	11.6008	11.4922	10.8704	11.3962	11.2479	11.1613
ENSG00000231978	0	0.178379	0	0	0	0
ENSG00000187942	0.0259655	0	0	0.0378014	0	0
ENSG00000142798	3.04922	1.36119	1.0703	2.43755	1.28736	1.0535
ENSG00000232037	0	0	0	0	0	0
ENSG00000283234	0	0	0	0	0	0
ENSG00000219073	0	0	0	0	0	0
ENSG00000285959	0	0	0	0	0	0
ENSG00000273610	0	0	0	0	0	0
ENSG00000201919	0	0	0	0	0	0
ENSG00000142789	0	0	0	0	0	0.0428081
ENSG00000278124	0	0	0	0	0	0
ENSG00000201273	0	0	0	0	0	0
ENSG00000228397	0.0517696	0	0	0	0.0507315	0.0465338
ENSG00000218510	1.62612	1.12027	1.0778	1.42793	0.956108	1.37814
ENSG00000285721	0.0880053	0.0930102	0.0856249	0.085414	0.102411	0.0840489
ENSG00000285752	0.860573	0.468054	0.456235	0.483556	0.221926	0.407126
ENSG00000285794	0	0	0	0	0	0
ENSG00000070831	0.194416	0.410946	0.311554	0.141519	0.301653	0.262131
ENSG00000230068	0.252713	0.316545	0.38569	0.408787	0.0825486	0.0757184
ENSG00000271428	0.119452	0.448872	0	0.579673	0	0.107371
ENSG00000162552	0.412052	0.169356	0.117914	0.237452	0.126184	0.104169
ENSG00000285873	0.0718773	0.337622	0.394916	0.139522	0.70436	0.516864
ENSG00000266564	0	0	0	0	0	0
ENSG00000234397	0	0	0.108495	0	0	0
ENSG00000279625	0	0	0	0.0915965	0	0
ENSG00000184677	9.59357	8.45714	7.30629	7.33039	7.34527	7.25753
ENSG00000237200	2.56231	0.401189	1.17318	2.27962	2.51093	1.72738
ENSG00000070886	0.130554	0.275958	0.22914	0.359012	0.298518	0.303156
ENSG00000276835	0	0	0	0	0	0
ENSG00000173372	0	0	0	0	0	0
ENSG00000159189	0	0	0	0	0	0
ENSG00000173369	0	0	0	0	0	0
ENSG00000133216	2.08653	1.86829	1.8467	1.89401	1.99449	2.00529
ENSG00000265422	0	0	0	0	0	0
ENSG00000225952	0	0	0	0	0	0
ENSG00000264014	0	0	0	0	0	0
ENSG00000215906	0	0	0	0	0	0
ENSG00000227868	0.797314	0.499353	0.40562	0.687855	0.694512	0.398154
ENSG00000004487	34.0325	39.2396	39.858	35.9424	42.1707	39.6349
ENSG00000240553	0	0	0	0.0849491	0.0857712	0.0786743
ENSG00000263793	0	0	0	0	0	0
ENSG00000266802	0	0.711199	0	0	0	0
ENSG00000169641	8.31112	8.20471	8.25178	8.38858	9.07306	7.80694
ENSG00000229010	0	0	0	0	0	0
ENSG00000206935	0.54479	0	0	0	0	0
ENSG00000252578	0	0	0	0	0	0
ENSG00000179546	1.9328	0.927193	1.35567	1.21733	0.906724	1.44161
ENSG00000215381	0	0	0	0	0	0
ENSG00000261326	2.65501	0.945392	1.41169	2.48332	0.92321	1.66477
ENSG00000284726	0.482554	0.906661	1.1489	0.749352	1.22948	2.2555
ENSG00000125944	48.8459	63.8263	63.4144	48.2227	66.4138	65.4541
ENSG00000125945	5.89296	5.2119	5.40845	5.89978	5.41062	5.02258
ENSG00000249087	2.15166	1.11381	1.1259	2.00307	1.2479	1.55909
ENSG00000201405	0	0	0	0	0	0
ENSG00000271420	0	0	0	0	0	0
ENSG00000204219	0.215591	0.109057	0.167048	0.305817	0.243771	0.313041
ENSG00000232482	0	0	0	0	0	0
ENSG00000088280	3.35404	2.41534	2.51487	2.68816	2.50803	2.35304
ENSG00000007968	9.89168	8.37943	9.46883	10.3884	10.0597	9.59221
ENSG00000235052	0.255669	0.240186	0.11706	1.86106	0.125271	1.03415
ENSG00000117318	1.36243	9.81273	6.05978	37.9063	49.3037	49.0439
ENSG00000285802	0	0	0	0	0	0
ENSG00000197880	0	0	0	0	0	0
ENSG00000229239	0	0	0	0	0	0
ENSG00000142676	179.043	216.331	244.113	239.794	260.096	258.537
ENSG00000011007	16.1221	21.8602	22.0509	16.5394	22.8982	21.5381
ENSG00000236810	0.908792	0.528516	0.752941	0.798029	0.678529	1.28367
ENSG00000057757	26.453	33.9697	33.1119	26.7352	34.9902	33.5092
ENSG00000011009	25.3769	31.1467	29.4122	29.4731	31.6053	28.8709
ENSG00000117308	5.78822	7.19977	7.01797	6.38579	5.45676	6.48049
ENSG00000117305	2.689	2.37129	2.45293	3.17978	2.0596	2.42631
ENSG00000179163	16.0041	13.8845	15.2289	14.7313	13.2275	13.7712
ENSG00000188822	0.0332847	0.010423	0.0101598	0.0430728	0	0.0199456
ENSG00000229106	0	0	0	0	0	0
ENSG00000232557	0.555167	0	0	0	0	0
ENSG00000264926	0	0	0	0	0	0
ENSG00000230228	0	0	0	0	0	0
ENSG00000189266	35.7642	35.1748	35.1894	34.5483	33.0326	32.4112
ENSG00000188529	28.3947	24.2719	26.5054	26.6117	24.0067	24.9214
ENSG00000215905	0	0	0	0	0	0
ENSG00000225315	0	0	0	0	0	0
ENSG00000142661	0	0	0.00576827	0.0122274	0.0123457	0.0113242
ENSG00000230703	0	0	0	0	0	0
ENSG00000142677	0.0208336	0.019572	0.0953887	0.0202202	0	0.0187266
ENSG00000185436	6.0862	4.98345	4.32631	4.96463	4.24685	4.85336
ENSG00000230023	0	0	0	0	0	0
ENSG00000232298	0.340494	0.127949	0.498874	0.396561	0.600599	0.306058
ENSG00000158055	0.473442	0.500367	0.311606	1.17747	0.913398	1.0506
ENSG00000001460	2.52046	2.25844	2.16378	2.37977	1.85915	2.09933
ENSG00000001461	9.19266	7.23254	7.72539	7.90525	7.97568	7.57763
ENSG00000117602	7.47087	5.88094	6.52442	7.17893	6.7964	6.07857
ENSG00000264443	0	0	0	0	0	0
ENSG00000184454	0.113134	0.0531415	0.103599	0.260783	0.0831494	0.0762694
ENSG00000227312	0	0	0	0	0	0
ENSG00000239106	0	0	0	0	0	0
ENSG00000133226	27.3764	27.6292	28.4477	22.6429	23.4005	27.9049
ENSG00000284699	0	0	0	0	0	0
ENSG00000169504	79.5735	57.7837	60.5047	80.7798	55.4334	56.5935
ENSG00000238482	0	0	0	0.528748	0	0
ENSG00000020633	8.50609	7.15555	6.64441	8.55583	7.69142	7.33305
ENSG00000278034	0.809618	0	0	0	0.793384	0
ENSG00000229162	0.639796	0.20035	0.065097	0.13799	0.278652	0.255596
ENSG00000261025	0	0	0	0	0	0
ENSG00000264371	0	0	0	0	0	0
ENSG00000285823	0	0	0	0	0	0
ENSG00000233755	0	0.126912	0	0	0.0661919	0
ENSG00000233419	0	0	0	0	0	0
ENSG00000231953	0	0.0554275	0.0540279	0	0	0
ENSG00000117614	12.8693	15.8275	15.8555	13.5984	15.3573	17.1962
ENSG00000284602	0.718675	0.625141	0.779975	0.516677	0.365174	0.717768
ENSG00000284657	0.306803	0.144111	0.772599	0.66998	0	0.0689436
ENSG00000117616	8.52455	6.42274	7.08432	7.3672	6.02804	6.42257
ENSG00000272432	0.841335	0.338736	0.660365	0.933214	0.942246	0.648212
ENSG00000261349	0	0	0	0	0	0.114155
ENSG00000187010	0	0	0	0	0	0
ENSG00000224183	1.09298	0.912706	1.11207	0.707201	1.30908	1.30993
ENSG00000259984	1.01599	0.357924	0	0.123259	0.622262	0.342465
ENSG00000183726	29.7446	33.1144	34.2349	33.647	32.2305	36.0633
ENSG00000188672	0.0479182	0.0675245	0.0658194	0.0930145	0.0469574	0.043072
ENSG00000238084	0.121951	0	0.223345	0.23672	0.478022	0.109617
ENSG00000204178	11.9837	10.9552	11.3359	12.5835	11.4994	11.0878
ENSG00000157978	11.1573	9.80182	9.93016	11.5626	9.49414	10.0581
ENSG00000225643	0.603442	0.11338	0.442067	0.351404	0.354805	0.216965
ENSG00000117643	2.05374	1.13456	0.987634	1.60464	0.942989	1.14361
ENSG00000233478	0.078632	0	0	0.0254389	0	0
ENSG00000162430	42.4413	32.6049	31.4196	46.3709	33.9462	36.0881
ENSG00000255054	0	0	0	0	0	0
ENSG00000228172	0.22958	0.137249	0.133783	0.162051	0.102262	0.150081
ENSG00000117640	6.51369	5.72383	6.31341	6.87627	5.25376	5.21539
ENSG00000272478	0	0	0	0	0	0
ENSG00000127423	9.00532	9.80173	9.75374	9.0221	9.70248	10.227
ENSG00000236528	0.13732	0	0.377241	0.199915	0.269134	0.123433
ENSG00000182749	1.78573	1.12946	1.37618	1.49291	1.17816	0.985326
ENSG00000207302	0.529932	0	0	0	1.03861	0
ENSG00000117632	53.5628	58.1035	53.5415	59.6936	50.591	54.6399
ENSG00000229786	0	0	0.425335	0	0.455168	0
ENSG00000223624	0	0.39116	0	0.404115	0	0.74853
ENSG00000283938	0	0	0	0	0	0
ENSG00000158006	4.14964	3.5699	4.18963	3.65864	3.23229	3.79828
ENSG00000207237	0	0	0	0	0	0
ENSG00000252190	0	0	0	0	0	0
ENSG00000252691	0	0	0	0	0	0
ENSG00000158008	0.346903	0.168982	0.129419	0.174579	0.0881343	0.173233
ENSG00000158014	0.116652	0.0782766	0.0457801	0.0646953	0.0816518	0.0748958
ENSG00000284309	0	0	0	0	0	0
ENSG00000158022	0	0	0	0.0219884	0	0.0203642
ENSG00000175087	7.27532	6.1102	8.07461	6.56208	6.76414	7.3252
ENSG00000197245	0.0611888	0.0574832	0.0186772	0.0791828	0.0599618	0
ENSG00000282872	0.2298	0.287844	0	0.223033	0.225192	0
ENSG00000236782	0.253079	0.317003	0.360499	0.245627	0.248004	0.353864
ENSG00000142684	0	0	0	0	0	0
ENSG00000142675	0.273945	0.731429	0.620539	0.629711	0.86187	0.894237
ENSG00000188782	0	0	0	0.02787	0	0
ENSG00000236155	0.0548034	0.0858075	0.0501845	0.0354598	0	0.114942
ENSG00000278572	0	0	0.0593766	0	0	0
ENSG00000130695	13.4146	12.8896	12.1077	13.5915	14.0228	13.667
ENSG00000270733	0.162828	0.305935	1.04373	0.474101	0.638253	0
ENSG00000142669	10.6728	17.3547	20.5927	13.2729	15.3204	19.9203
ENSG00000158062	5.36579	6.50768	6.11641	6.06172	6.69114	6.92836
ENSG00000169442	0.24938	0.0585693	0.171271	0.181528	0.12219	0.0560397
ENSG00000176092	0.278992	0.182674	0.239995	0.205134	0.198835	0.159585
ENSG00000225854	0	0	0.925657	0.163515	0.330194	0
ENSG00000176083	0	0	0	0	0	0.0440497
ENSG00000131914	0.014544	0	0.0266365	0	0	0.0261463
ENSG00000117682	4.79174	6.13581	5.85687	4.51921	5.63478	6.06743
ENSG00000223583	0.435832	0.307079	0.399099	0.10575	0	0.391754
ENSG00000225891	0.661163	0.517602	0.30272	0.962542	0.323953	0.495247
ENSG00000198830	179.757	312.292	330.553	259.429	313.258	330.192
ENSG00000224129	0	0	0	0	0.127366	0
ENSG00000117676	8.37138	7.08262	6.75863	7.65373	6.9026	7.60488
ENSG00000238705	0	0	0	0	0	0
ENSG00000243905	0	0	0.175591	0	0	0
ENSG00000252802	0	0	0	0	0	0
ENSG00000252429	0	0	0	0	0	0
ENSG00000229247	0	0	0	0	0	0
ENSG00000238316	0	0	0	0	0	0
ENSG00000235069	0	0	0	0	0	0
ENSG00000260063	0.46634	0.410718	0.507106	0.650625	0.285618	0.340581
ENSG00000117713	15.4368	12.5732	12.0915	13.5721	13.1333	11.8821
ENSG00000060642	3.42999	1.79734	2.1939	3.22862	1.94241	2.55633
ENSG00000241188	0.200318	0	0	0.583259	0.196301	0
ENSG00000204160	8.17125	10.3057	10.0258	9.89769	10.3192	10.6317
ENSG00000175793	3.66536	3.48488	6.06586	3.98604	6.18839	6.8672
ENSG00000142751	14.3536	13.7593	14.3339	13.7151	14.8804	14.9435
ENSG00000226698	0	0	0	0	0	0
ENSG00000198746	5.68516	8.8112	7.65307	6.53485	8.03582	8.92517
ENSG00000090273	62.9257	94.5111	97.0214	72.3643	96.7662	109.307
ENSG00000131910	0	0.0947445	0.0461761	0.0489412	0.0988298	0.0453262
ENSG00000175707	1.7556	2.01579	2.50077	2.71363	2.70804	3.536
ENSG00000172746	0	0	0	0	0	0
ENSG00000224064	0.146833	0	0	0	0	0
ENSG00000225294	0	0	0	0	0	0
ENSG00000253368	7.67007	5.57046	7.64494	7.93096	6.50446	6.60267
ENSG00000158246	0.910821	1.29506	1.35252	0.692866	1.15791	1.19487
ENSG00000090020	8.08914	7.61759	8.426	8.22976	8.09905	8.11304
ENSG00000229985	0	0	0	0	0	0
ENSG00000214973	0.364328	0.256698	0.500433	0.2652	0.267767	0.654964
ENSG00000225159	0.403408	0.315815	0.923522	0.39153	0.922412	0.604349
ENSG00000225990	0	0	0	0	0	0
ENSG00000224311	0	0	0	0	0	0
ENSG00000142784	18.8986	18.145	17.7755	20.6713	18.7757	18.2398
ENSG00000252098	0	0.526561	1.02653	0	0	0
ENSG00000243659	0.413422	0.776771	0.567867	0.802498	0.405132	0.185805
ENSG00000186501	8.04843	9.94678	9.4571	8.3676	11.4605	11.2848
ENSG00000206888	0.54479	0.511798	3.99099	1.0575	2.13546	1.46908
ENSG00000241547	2.49113	1.7552	3.07959	2.05511	1.58677	3.13487
ENSG00000142765	1.0648	0.411894	0.468409	1.00305	0.583103	0.684991
ENSG00000142733	3.35556	4.05934	3.02962	4.12522	3.73825	3.30194
ENSG00000142748	0.0538002	0.025271	0	0.026108	0.0263607	0
ENSG00000174950	0.114243	0.0268311	0	0.0277198	0.0559761	0
ENSG00000231207	0	0	0	0	0	0
ENSG00000181773	0.385861	0.54374	0.53001	0.534998	0.810264	1.13961
ENSG00000158195	31.6727	30.9317	31.7494	31.2883	30.4841	31.5712
ENSG00000241169	0	0	0	0	0	0
ENSG00000237429	0.205981	0.774026	0.18862	0.399831	0	0
ENSG00000126705	3.40046	2.6599	2.65064	3.17759	2.80214	2.55765
ENSG00000000938	0	0	0	0	0.0164432	0
ENSG00000235912	3.94689	8.55662	10.5647	4.71467	10.4132	7.36834
ENSG00000233975	0	0	0	0	0	0.237629
ENSG00000126709	15.6345	9.11651	8.02236	12.3617	7.52843	9.51022
ENSG00000225886	0.0353074	0	0.0646633	0.0342678	0.0345994	0.0952097
ENSG00000206767	0	0	0	0	0	0
ENSG00000226662	0	0	0	0	0	0
ENSG00000207095	0	0	0	0	0	0
ENSG00000009780	3.82933	3.95038	3.48012	3.66048	4.27648	4.53312
ENSG00000231344	0.167027	0.156912	0.6118	0.162109	0.327356	0.150135
ENSG00000230833	0	0	0	0	0	0.0775105
ENSG00000117758	17.3847	15.3494	16.9327	16.3874	14.6151	15.2042
ENSG00000269971	0	0	0	0.922436	0.310455	0
ENSG00000270031	0	0	0.297379	0	0	0.437859
ENSG00000223062	0	0	0	0	0	0
ENSG00000117751	26.5511	33.6073	32.7586	27.6558	34.3066	32.3974
ENSG00000252947	0.70232	0.329894	0	1.02246	1.72059	0.946936
ENSG00000130775	0.353212	0.237015	0.311891	0.367298	0.271958	0.442217
ENSG00000117748	45.1558	58.8851	57.266	51.4481	59.7266	60.001
ENSG00000130768	4.73763	4.2046	5.29797	4.59813	4.92076	7.02553
ENSG00000227050	0.356166	0	0.326148	0	0.232683	0.106715
ENSG00000158156	8.01177	8.10555	8.99065	8.374	7.66369	8.90159
ENSG00000158161	9.37824	7.86422	8.08556	8.46503	7.80681	8.71264
ENSG00000238231	0.31767	0	0.436345	0	0.466951	0
ENSG00000240750	0.588813	0.921925	0.539187	0	0.192335	0.176421
ENSG00000228589	12.9254	13.1076	11.9144	24.6741	13.505	4.4626
ENSG00000228943	0	0	0	0	0	0
ENSG00000214812	0	0	0	0	0	0
ENSG00000253005	0	0	0	0	0	0
ENSG00000169403	0.123869	0.174551	0.260886	0.252464	0.206354	0.233816
ENSG00000126698	50.6426	62.4988	62.2145	54.2057	59.873	62.1762
ENSG00000130770	54.1269	71.5725	70.9888	66.6962	68.42	71.8017
ENSG00000270605	4.19586	1.77379	2.16812	2.87971	1.61532	2.37067
ENSG00000271398	0.137159	0	0.125599	0.13312	0.134409	0
ENSG00000130766	35.9243	17.8576	18.5352	33.8342	19.7526	20.5157
ENSG00000130772	5.63004	6.53676	6.31883	6.50106	7.89376	7.81155
ENSG00000204138	12.6186	10.583	10.4324	11.6598	10.9925	10.7771
ENSG00000206779	0	0.542201	0	0	0	0
ENSG00000229820	0	0	0	0.143594	0.144984	0.132988
ENSG00000221216	0	0	0	0	0.480031	0
ENSG00000180198	30.3757	37.6914	38.4146	29.8887	41.9465	42.0336
ENSG00000242125	24.7258	25.3048	26.0761	23.6518	23.7549	24.1221
ENSG00000274266	0	0	0	0	0	0
ENSG00000200087	2.57173	5.36886	4.70996	2.21867	6.44041	3.85273
ENSG00000231468	1.33567	0.35851	1.2231	0.740767	0.46746	0.68605
ENSG00000279443	1.31529	0.999025	1.33257	1.52101	1.26149	1.15711
ENSG00000180098	5.99016	5.69091	5.95582	5.91877	5.45928	6.13791
ENSG00000197989	5.47944	5.66109	5.59322	4.17756	5.39635	6.0307
ENSG00000221539	2.36321	1.48006	0.721345	2.29362	1.54388	4.95648
ENSG00000278274	0	0	0	0	0	0
ENSG00000273544	0	0	0	0	0	0
ENSG00000280498	0	0	0	0	0	0
ENSG00000274582	0	0	0	0	0	0
ENSG00000120656	6.95918	5.08491	7.51471	7.09319	4.9864	6.03116
ENSG00000188060	0.0794898	0.024892	0.194107	0.205731	0.0519306	0.190535
ENSG00000229388	0.298019	0.111988	0.109161	0.0578488	0.233634	0.750061
ENSG00000270103	0	0	0	0	0	0
ENSG00000274978	0	0	0	0	0	0
ENSG00000162419	4.85545	3.94248	4.0826	4.43219	3.57299	3.75598
ENSG00000252777	0	0.421249	0	0.870401	0.439413	0
ENSG00000198492	36.48	38.4571	38.6203	36.8866	38.9607	38.7513
ENSG00000116329	0.0935675	0.082041	0.0856815	0.181625	0.183382	0.213065
ENSG00000233427	0.268629	0.100944	0	0.0521439	0.0526485	0
ENSG00000199756	0	0	0	0	0	0
ENSG00000159023	8.95978	8.78422	9.35804	8.06491	8.26868	8.36026
ENSG00000225616	0	0.33089	0	0	0.172579	0
ENSG00000206704	0	0	0	0	0	0
ENSG00000277958	0	0	0	0	0	0
ENSG00000253304	3.64466	2.32413	2.26544	2.93707	2.29447	2.20389
ENSG00000225750	0.208934	0	0	0	0	0.187803
ENSG00000116350	23.7811	20.6783	20.1261	21.3886	22.9253	21.2523
ENSG00000277916	0	0	0	0	0	0
ENSG00000116353	3.41848	4.59378	5.40328	4.14006	4.7773	5.74471
ENSG00000237934	0.101732	0.382285	0.652106	0.394946	0.299077	0.182887
ENSG00000060656	9.60492	5.99091	6.48671	10.499	7.77948	7.53571
ENSG00000230523	0.027138	0	0	0.026339	0	0
ENSG00000225011	0	0	0	0	0	0
ENSG00000228176	0	0	0	0	0	0
ENSG00000284676	0	0	0	0	0	0
ENSG00000270927	0	0	0	0	0	0
ENSG00000233399	0	0	0	0	0	0
ENSG00000233372	0	0	0	0	0	0
ENSG00000231251	0	0	0	0	0	0
ENSG00000236335	0	0	0	0	0	0
ENSG00000231949	0	0	0	0	0	0
ENSG00000162510	0.0632789	0.035668	0.0695348	0.0614156	0.024804	0.0568792
ENSG00000186056	0.0724311	0.217743	0.185714	0.154656	0.170349	0.143233
ENSG00000162511	0	0	0.0326082	0.0172804	0.104686	0.016004
ENSG00000264773	0	0	0	0	0	0
ENSG00000229607	0	0	0	0	0	0
ENSG00000223382	0.0354147	0	0.0648597	0.0343719	0.104114	0.031833
ENSG00000222784	0	0	0	0	0	0
ENSG00000235143	0	0	0	0	0	0
ENSG00000162512	5.94721	4.62617	4.66797	5.46787	4.27599	4.18168
ENSG00000266210	0	0	0	0	0	0
ENSG00000134644	31.7831	25.9792	25.5651	29.1895	27.2979	25.15
ENSG00000237329	0	0	0	0	0	0
ENSG00000232768	0	0	0	0	0	0
ENSG00000215900	0	0	0	0	0	0
ENSG00000225142	0	0	0	0	0	0
ENSG00000084628	0.72207	1.04501	1.05437	1.15539	1.1092	1.15775
ENSG00000060688	20.0517	22.9435	23.8633	22.2164	24.4479	23.9911
ENSG00000229447	2.00089	0.375943	0.85505	0.776788	1.30718	0.479607
ENSG00000121766	12.0469	16.2206	18.0062	14.3134	15.1953	16.3656
ENSG00000229044	0	0	0	0.25775	0	0
ENSG00000121769	2.38624	1.97486	1.40472	1.59913	1.83731	1.63422
ENSG00000168528	8.42605	7.20598	7.73093	8.27359	6.98553	8.755
ENSG00000215899	0	0	0	0	0	0
ENSG00000206981	0	0	0	0	0	0
ENSG00000260386	0.0163973	0	0.045046	0	0	0
ENSG00000265961	0	0	0	0	0	0
ENSG00000284543	0.00591922	0.0166823	0.00542034	0.00574493	0	0.0159617
ENSG00000229167	0	0.555963	0.180641	0	0	0.443292
ENSG00000142910	0.0331145	0.0933272	0.0303235	0.107131	0.0865346	0.0892963
ENSG00000121764	0.27346	0.107041	0.166941	0.442346	0.111657	0.163869
ENSG00000162517	27.2747	33	35.115	31.7558	31.4218	36.6803
ENSG00000235790	0.210442	0.0247122	0.0722647	0.178715	0.128889	0.307384
ENSG00000264078	0	0	0	0	0	0
ENSG00000084636	0.0314449	0.0649893	0.0287947	0.0549342	0.0184886	0.0169588
ENSG00000121753	4.87024	2.08995	1.97524	4.0995	2.1948	2.12129
ENSG00000266580	0	0	0	0.744422	0	0
ENSG00000254545	0	0	0	0	0	0
ENSG00000134668	0.164552	0.069564	0.0678075	0.0558973	0.112877	0.073955
ENSG00000203620	0.0258274	0	0	0	0	0.0464307
ENSG00000269967	0	0.0932919	0	0	0.0973145	0.178525
ENSG00000184007	31.2415	32.7808	30.1337	29.3195	30.5895	28.347
ENSG00000228634	0.338254	0.105923	0.103249	0.109431	0.110491	0.101348
ENSG00000284702	0.0311225	0	0	0	0	0
ENSG00000121774	75.0264	97.4977	101.344	78.3203	99.9186	89.6066
ENSG00000203325	0.0934175	0.26328	0	0.0906668	0	0
ENSG00000121775	6.82147	5.65101	7.15513	6.88142	6.23904	5.03532
ENSG00000266203	0	0	0.904738	0	0	0
ENSG00000276493	0	0	0	0	0	0
ENSG00000025800	19.8569	22.0953	22.0797	18.0242	21.2763	21.9535
ENSG00000250135	0	0	0	0	0	0
ENSG00000084652	34.281	38.1501	37.5529	32.1851	35.7988	34.3769
ENSG00000160050	4.6543	3.82831	3.97789	3.8748	2.7974	3.23531
ENSG00000224066	0.55844	0.322844	0.236019	0.250152	0.126287	0.386125
ENSG00000160051	4.02261	3.9337	3.66203	3.72151	3.25038	3.80608
ENSG00000222046	1.18519	0.410205	0.314165	0.605415	0.458456	0.420522
ENSG00000160055	2.31799	1.80956	1.70408	1.91703	1.55166	1.57001
ENSG00000084623	108.509	178.065	157.416	121.417	165.907	168.977
ENSG00000220785	0.354362	0.351396	0.288441	0.229285	0.28938	0.407002
ENSG00000183615	0.311392	0.117014	0.285147	0.423112	0.244118	0.447838
ENSG00000182866	0.384078	0.0164008	0.111907	0.101664	0.068432	0.0784623
ENSG00000277617	0	0	0	0	0	0
ENSG00000252450	0	0	0	0	0	0
ENSG00000116478	53.512	61.9341	59.3196	53.5496	61.4191	59.3516
ENSG00000175130	150.552	230.653	220.43	175.822	200.252	194.446
ENSG00000233775	0	0	0	0	0.0831494	0.0762694
ENSG00000162526	1.17064	0.674844	0.633441	0.800483	0.495367	0.334806
ENSG00000225828	8.23676	4.79291	3.62118	5.98573	4.53776	4.23597
ENSG00000160058	25.8324	18.2687	19.2885	22.3742	17.9451	17.0702
ENSG00000224333	0	0	0	0	0	0
ENSG00000270850	0	0	0	0	0	0
ENSG00000229259	0	0	0	0	0	0
ENSG00000263529	0	0	0	0	0	0
ENSG00000254553	0	0	0	0.0164131	0	0
ENSG00000273274	0.971996	0.529105	0.420082	0.59512	0.654291	0.412351
ENSG00000160062	1.81263	1.63319	1.55423	1.87121	1.34836	1.51081
ENSG00000176261	5.59648	6.26564	7.16565	6.40907	6.81083	6.91505
ENSG00000200591	1.14299	0	1.04666	0	0	1.54109
ENSG00000162521	34.0891	32.8979	32.8507	34.3101	30.1181	30.4534
ENSG00000162520	0.183888	0.0785236	0.153082	0.129799	0.131055	0.180317
ENSG00000224409	0	0	0	0	0	0
ENSG00000162522	18.4601	14.028	13.8348	15.185	12.6026	12.5612
ENSG00000134684	29.7354	22.8999	26.8718	29.6315	25.8768	27.5704
ENSG00000116497	6.32126	4.77696	4.90599	6.60895	4.635	4.46806
ENSG00000160097	0.687105	0.54082	0.357111	0.720944	0.491347	0.300461
ENSG00000121905	0.234224	0.137525	0.0536208	0.198911	0.0860728	0.0789509
ENSG00000121900	3.70242	3.74873	4.29447	4.1923	4.27319	4.80707
ENSG00000116514	9.71542	9.67258	9.98054	9.71114	11.9062	8.87338
ENSG00000278966	0	0.0601123	0.234378	0.124207	0.313522	0.115032
ENSG00000217644	0.332467	0.312333	0.304446	0.215118	0.4344	0.298843
ENSG00000239670	0.202639	0.253823	0.18556	0	0	0.24286
ENSG00000236065	0	0	0.0635471	0.0673525	0	0
ENSG00000004455	27.8994	35.7528	38.4478	29.9329	37.6735	39.8079
ENSG00000276645	0	0	0	0.163989	0.331152	0
ENSG00000142920	0.942065	0.51765	0.651069	0.78494	0.65319	0.511269
ENSG00000278997	0.514346	0.201332	0.235498	0.2912	0.210013	0.385273
ENSG00000116525	2.59007	2.65851	2.69387	2.04828	2.41279	1.99759
ENSG00000279179	0.21978	0.111176	0.201257	0.114859	0.0828359	0.16716
ENSG00000284721	0.0598793	0	0	0	0	0
ENSG00000160094	10.465	7.18437	6.87476	9.64732	6.58525	6.11902
ENSG00000270115	1.24291	0.700584	0.341447	0.96505	0.121799	0.223442
ENSG00000184389	0.341892	0.214125	0.313077	0.497737	0.223357	0.204876
ENSG00000225313	0.508154	0.395544	0.438736	0.507282	0.270324	0.495913
ENSG00000134686	13.252	12.2624	11.7489	13.1575	13.3537	12.5858
ENSG00000284154	1.16585	1.64287	0.533795	0.565761	0	0
ENSG00000222112	2.72942	0.915758	0.892635	0.756871	1.52839	0.700965
ENSG00000233246	0.237929	0.22352	0.217876	0.461846	0	0
ENSG00000234512	0	0	0	0	0	0
ENSG00000121903	2.43801	2.13561	2.10179	2.12107	1.98017	1.39186
ENSG00000235907	0.316807	0.148811	0.362633	0	0.232841	0.42715
ENSG00000121904	0.054578	0.0723851	0.158754	0.0903622	0.0817985	0.0836876
ENSG00000227000	0	0	0	0	0	0
ENSG00000176256	0	0	0	0.0220914	0	0
ENSG00000231163	0	0	0	0	0	0
ENSG00000201148	0	0	0	0	0	0
ENSG00000142698	0	0	0.0207219	0	0	0.0203405
ENSG00000270241	0	0	0	0	0	0
ENSG00000207941	0	0	0	0	0	0
ENSG00000163866	4.30115	5.79367	5.76613	4.94368	5.72578	5.78952
ENSG00000189280	0.0860406	0.040415	0	0	0	0.0386694
ENSG00000189433	0	0	0	0	0.020114	0
ENSG00000255811	0	0	0	0	0	0
ENSG00000188910	0	0	0.0447252	0.0711053	0.0478623	0.021951
ENSG00000187513	0	0	0	0	0	0
ENSG00000230163	4.04809	2.50994	2.37242	3.92889	2.85618	3.27482
ENSG00000116544	1.11396	0.688488	0.791902	1.09539	0.502722	0.830027
ENSG00000284773	0.258013	0.121194	0.151886	0.143095	0.270899	0.115959
ENSG00000241014	0.18535	0.174125	0.14144	0.359784	0.211905	0.222139
ENSG00000271741	0	0	0	0	0	0
ENSG00000243749	0	0	0.173686	0.184087	0.0619562	0
ENSG00000163867	1.20949	1.18763	1.61402	0.937921	1.33414	1.38218
ENSG00000197056	4.61203	5.80145	6.60597	5.25659	4.80408	4.78801
ENSG00000233940	0	0	0	0	0	0
ENSG00000228348	0	0	0.230581	0.122195	0	0.113169
ENSG00000284640	0.030908	0	0	0.0299979	0	0
ENSG00000116560	90.4924	98.8613	103.208	90.5019	99.101	98.8884
ENSG00000201868	0	0	0	0	0	0
ENSG00000146463	20.7496	18.2971	19.3847	17.8821	17.5771	17.7672
ENSG00000240374	0	0	0	0	0	0
ENSG00000201542	0	0	0	0	0	0
ENSG00000229994	1.05269	0.988936	0.722974	0.638556	1.28947	1.30106
ENSG00000227409	0.253998	0	0	0.123259	0.373357	0
ENSG00000278702	0	0	0	0	0	0
ENSG00000142687	12.6525	8.39435	8.19902	9.70648	7.49863	7.68353
ENSG00000236274	0	0	0	0	0	0
ENSG00000020129	11.7842	13.6878	13.3639	12.7719	15.0215	14.418
ENSG00000239636	0.282973	0.0531673	0.414598	0.768995	0.332759	0.559581
ENSG00000116819	1.57832	0.741367	0.4095	0.765922	1.08267	0.543833
ENSG00000126067	35.1103	54.5814	55.2643	41.0507	54.8708	57.904
ENSG00000142686	7.88692	7.96763	7.384	6.7037	7.99636	7.20478
ENSG00000092853	14.9421	19.1177	18.2305	11.9927	17.3239	15.7162
ENSG00000232335	0.108149	0	0.0990344	0.104965	0	0
ENSG00000134698	9.53761	6.61639	6.32445	7.1158	6.94885	5.7538
ENSG00000092847	10.8727	11.1568	10.7366	9.23649	10.4119	9.81455
ENSG00000271164	0	0	0	0	0	0
ENSG00000271914	0	0	0	0	0	0
ENSG00000126070	2.9729	2.32178	2.31866	2.35856	2.24639	2.10262
ENSG00000271554	0.353824	0.166198	0.486005	0.171703	0.433411	0.95412
ENSG00000232862	0	0.163567	0.12755	0.101391	0.034124	0.0313005
ENSG00000092850	0.294704	0.221486	0.269866	0.657861	0.519831	0.238409
ENSG00000116863	18.9416	23.146	24.4496	16.6879	22.6029	23.1201
ENSG00000171812	0.037447	0.0234528	0.0457212	0.0969183	0.012232	0.0224399
ENSG00000054116	19.0232	20.6504	19.9322	19.0084	19.6459	22.6257
ENSG00000116871	28.4329	29.6409	27.9607	28.1109	30.7781	27.1081
ENSG00000264592	0	0	0	0	0	0
ENSG00000054118	50.6244	51.0391	52.5906	43.101	52.9383	51.2465
ENSG00000231849	0	0	0	0	0	0
ENSG00000214193	1.92832	2.69283	1.84931	2.5291	2.63019	1.75672
ENSG00000142694	6.88343	7.82319	7.71381	8.5962	7.31145	4.62964
ENSG00000116883	1.39547	1.87706	1.13265	0.92344	1.21209	1.45389
ENSG00000196182	12.2425	13.0783	12.9486	12.9548	13.4685	13.882
ENSG00000181817	16.9111	19.5841	20.8023	20.2706	20.4668	26.1635
ENSG00000222821	0	0	0	0	0	0
ENSG00000116885	1.54722	1.74815	1.7423	2.19161	1.78255	2.19887
ENSG00000201448	0	0	0.413795	0.438574	0	0
ENSG00000116898	21.5498	30.0855	32.5476	24.5823	32.9695	34.8416
ENSG00000119535	0	0	0	0	0	0.00621629
ENSG00000230214	0	0	0	0	0	0
ENSG00000284705	0	0	0	0	0	0
ENSG00000284720	0	0	0	0	0	0
ENSG00000234481	0	0	0	0	0	0
ENSG00000163873	0.00576526	0.0108322	0	0.055955	0.101694	0.134737
ENSG00000284650	0	0	0	0	0	0
ENSG00000264698	0	0	0	0	0	0
ENSG00000207328	0	0	0	0	0	0
ENSG00000223944	0	0	0	0	0	0
ENSG00000252368	0	0	0	0	0	0
ENSG00000230451	0	0	0	0	0	0
ENSG00000233621	0.250721	0.51033	0.497444	0.689458	0.450437	1.01414
ENSG00000163874	3.26857	2.89516	2.78785	2.66475	3.40436	3.69348
ENSG00000283724	0	0	0	0	0	0
ENSG00000163875	17.4359	19.7879	20.7272	17.9771	19.9695	21.6831
ENSG00000263675	9.71542	2.73812	5.33795	6.60054	4.7603	12.226
ENSG00000163877	4.78951	4.80321	5.21859	4.9721	5.80247	5.35869
ENSG00000232273	0.109572	0.205873	0.100337	0.106346	0.214751	0.393963
ENSG00000237749	0	0.216452	0	0.223621	0	0.414206
ENSG00000163879	0.784908	0.430135	0.598963	0.609437	0.423043	0.470351
ENSG00000134697	15.291	22.7438	21.8536	17.1255	22.6506	23.8318
ENSG00000284748	0	0	0	0	0	0
ENSG00000169218	0	0.0531845	0	0	0	0
ENSG00000116922	11.8846	11.3502	12.3758	10.3991	10.5899	12.1834
ENSG00000134690	27.5526	36.3751	35.8458	34.0511	37.0644	37.5417
ENSG00000183317	1.14411	1.22933	1.10007	1.24923	1.08613	1.30479
ENSG00000200421	0	0	0	0	0	0
ENSG00000214141	0.03081	0	0	0	0	0
ENSG00000227416	0.13588	0.127651	0	0	0.133155	0.122138
ENSG00000185090	8.0157	13.6997	12.9292	10.6853	11.6216	11.5281
ENSG00000233728	0	0	0	0	0	0
ENSG00000196449	12.2267	18.2341	17.4521	15.3059	18.4885	19.7422
ENSG00000197982	15.4158	18.6305	20.0024	18.7911	17.5647	18.7418
ENSG00000188786	5.52123	6.03996	5.46834	5.14713	5.62409	5.19139
ENSG00000235673	0	0.0792509	0	0	0	0.227484
ENSG00000204084	3.42052	2.80864	2.80945	2.92067	2.87217	2.72254
ENSG00000230955	0	0	0	0	0	0
ENSG00000252448	0	0	0	0.69847	0	0
ENSG00000222282	0	0	0	0.595538	0	0
ENSG00000277168	0	0	0	0	0	0
ENSG00000183431	29.6505	41.3721	39.2914	32.1075	42.4209	42.183
ENSG00000212541	7.55644	6.59176	3.45979	3.66697	3.70246	4.85158
ENSG00000183386	9.74451	9.97418	9.02977	9.37288	9.12154	9.30807
ENSG00000183520	15.5849	21.3549	21.7303	15.9282	20.9425	21.8412
ENSG00000185668	0.720649	0.351041	0.439941	0.518096	0.601577	0.551801
ENSG00000224592	0.085223	0.160124	0.312161	0.248141	0.41757	0.229812
ENSG00000223589	0	0	0	0	0	0
ENSG00000265596	0	0	0	0.571476	0	0
ENSG00000284623	0	0	0	0	0	0
ENSG00000237290	0	0	0	0.0219884	0	0
ENSG00000275350	0	0	0	0	0	0
ENSG00000200796	0	0	0	0	0	0
ENSG00000238063	0	0	0	0	0	0
ENSG00000215895	0	0.0558799	0	0.0577307	0	0.0267332
ENSG00000284632	0.0940202	0	0.043048	0.136878	0	0
ENSG00000116954	3.39579	5.596	5.54767	3.93087	4.8423	5.29346
ENSG00000273637	0	0	0	0	0	0
ENSG00000228436	1.19452	1.79549	1.53138	1.56512	1.40468	1.07371
ENSG00000214114	6.25316	7.38814	8.0447	5.9201	6.5977	8.25871
ENSG00000274944	0.0179306	0	0.0164194	0.052208	0	0.0161172
ENSG00000131233	0.113354	0.0798673	0.103801	0.0825125	0.0277704	0.0254726
ENSG00000158315	0.229416	0.176337	0.267375	0.101209	0.143065	0.0937336
ENSG00000199963	0	0	0	0	0	0
ENSG00000207466	0	0	0	0	0	0
ENSG00000235549	0	0	0	0	0	0
ENSG00000174574	56.102	55.0221	54.7038	55.606	57.5821	51.2501
ENSG00000168653	172.963	233.34	227.642	197.707	246.528	257.683
ENSG00000127603	9.9074	8.49281	8.0032	8.68799	8.26869	7.14979
ENSG00000206654	0	0	0	0.544001	0	0
ENSG00000222378	0.876579	0	0	0	0	0
ENSG00000270040	0	0	0	0	0	0
ENSG00000226438	0	0	0	0	0	0
ENSG00000217897	0	0	0	0	0	0
ENSG00000183682	0.413422	0.517847	0.34703	0.468124	0.506415	0.371611
ENSG00000237624	0.113927	0.178379	0.20865	0.184287	0.223285	0.307214
ENSG00000243970	3.13204	2.1638	1.72478	2.49662	2.16218	1.83816
ENSG00000090621	33.3665	54.2617	52.1753	40.0003	53.8303	52.6443
ENSG00000228060	1.98004	2.30657	2.24832	1.61426	1.62989	1.35264
ENSG00000201457	6.04515	8.92423	5.14025	5.02898	2.96197	4.65752
ENSG00000163909	1.86294	1.33129	1.5747	2.20988	1.4355	1.73178
ENSG00000225903	0	0	0	0	0	0
ENSG00000116981	2.10632	0.395753	0.43398	0.919936	0.567624	0.520658
ENSG00000116983	0.540398	0.364199	0.355003	0.54729	0.460489	0.496305
ENSG00000084072	6.09576	6.30333	6.95766	6.59622	6.60344	7.36844
ENSG00000225333	0	0	0	0	0	0
ENSG00000252413	0	0	0	0	0	0
ENSG00000116985	5.01688	3.12311	3.15495	4.77529	3.57763	2.82523
ENSG00000198754	2.04311	1.91938	1.05239	1.17738	1.53289	1.1765
ENSG00000285905	0.0478592	0.179843	0.0438256	0.1858	0.0937991	0
ENSG00000261798	0.974791	0.366303	0.758739	1.22991	0.573147	0.262862
ENSG00000229213	0	0	0	0	0	0
ENSG00000284719	0.668492	0.219803	0.612151	0.454166	0.655088	0.510752
ENSG00000284678	0	0.0813705	0.158632	0.0840655	0.169758	0.155712
ENSG00000043514	3.84572	3.60444	3.79123	3.37742	3.38387	3.60115
ENSG00000202222	0	0.484622	0	0	0	0.463691
ENSG00000116990	2.61355	1.2006	1.42331	2.11196	1.43289	1.57305
ENSG00000236546	0	0	0.0679994	0	0.072769	0
ENSG00000207356	0	0	0	0	0	0.480707
ENSG00000168389	3.97151	4.838	4.83573	3.99576	5.97325	5.91053
ENSG00000228477	0.482421	0.52874	0.883523	0.312144	0.315165	0.650447
ENSG00000131236	33.4563	42.5722	45.486	39.4134	44.3629	41.6539
ENSG00000131238	21.6191	26.843	28.4733	24.8855	26.0582	28.1346
ENSG00000226745	0	0	0	0	0	0
ENSG00000117000	8.43683	8.03111	8.22999	8.1884	9.36513	8.53991
ENSG00000207508	0	0	0	0	0.533866	0
ENSG00000188800	0	0	0	0	0	0
ENSG00000259943	7.6412	7.39167	8.97164	9.91275	7.89574	9.24855
ENSG00000084073	33.6504	40.3512	43.4867	33.1189	40.7318	44.7693
ENSG00000231296	0.372476	0.17496	0	0.542263	0.547511	0
ENSG00000049089	0.926156	0.311666	0.265822	0.536648	0.243829	0.211229
ENSG00000227311	0	0	0	0	0	0
ENSG00000084070	14.4969	14.2825	14.26	15.8775	14.1747	15.1232
ENSG00000213172	0	0	0	0	0	0
ENSG00000284677	0.606312	0.325482	0.158632	0.252196	0.0848791	0.155712
ENSG00000187801	5.3504	2.59352	2.86361	3.29592	2.99265	2.34974
ENSG00000260920	4.87953	2.79514	2.4412	2.98012	2.37918	2.22511
ENSG00000279667	1.56607	0.599389	0.584254	0.562946	0.682073	0.782046
ENSG00000187815	3.82275	3.50695	4.02647	3.91922	3.55264	4.09756
ENSG00000238287	2.11973	1.44826	2.55869	2.33785	1.51071	1.99196
ENSG00000164002	2.67708	3.64846	3.60813	2.36039	3.8612	3.91453
ENSG00000227278	0	0	0	0.130963	0	0
ENSG00000238186	1.06763	0.802379	0.879883	0.932573	0.836976	1.72738
ENSG00000117010	2.24562	2.37333	2.43335	2.36112	2.40231	2.60724
ENSG00000236505	0	0.434622	0	0	0	0
ENSG00000233910	0	0	0	0	0	0
ENSG00000117016	5.89774	2.89139	3.37911	4.44163	3.24503	3.07792
ENSG00000237899	0.495053	0.232536	0.906659	0.840833	0.242563	0.556232
ENSG00000272145	2.45333	1.49322	2.53134	2.31402	2.06553	1.80144
ENSG00000066136	9.03096	10.1022	10.0254	8.4628	9.03107	9.63092
ENSG00000198974	0	0	0	1.22991	0	0
ENSG00000207962	0	0	0	0	0	0
ENSG00000117013	2.40834	1.76249	1.8642	2.35034	1.96888	1.92557
ENSG00000264582	0	0	0	0	0	0.531052
ENSG00000179862	1.01879	0.540965	0.892363	1.50468	1.17199	0.836124
ENSG00000229528	0	0	0	0	0	0
ENSG00000228940	0	0	0	0	0	0
ENSG00000233118	0	0	0	0	0	0
ENSG00000171793	12.9674	14.7307	15.2255	13.7007	16.6158	15.9507
ENSG00000281207	1.53018	1.2892	1.07871	1.01365	1.28528	1.14619
ENSG00000171790	1.1361	1.10541	0.916493	0.590702	0.808478	0.802369
ENSG00000010803	15.0745	11.6987	12.0395	13.7146	11.7022	11.2524
ENSG00000215893	0	0.109744	0	0.566895	0	0
ENSG00000235358	0	0	0	0.231237	0	0
ENSG00000213987	0	0	0	0	0	0
ENSG00000204060	4.39989	2.39785	2.40408	5.02531	2.21539	2.79684
ENSG00000229901	0.295901	0	0.270962	0	0	0.53195
ENSG00000252563	0	0	0	0	0	0
ENSG00000127129	0.0355659	0	0.0325684	0	0.0697055	0.0319689
ENSG00000127124	0.78074	0.657452	0.711233	0.808791	0.71355	0.810864
ENSG00000230881	0	0	0	0	0	0.197725
ENSG00000230638	0	0	0	0.126173	0.0254789	0.0233707
ENSG00000284895	0	0	0	0	0	0
ENSG00000227538	0	0.0966679	0	0.0499348	0	0
ENSG00000228776	0	0	0	0	0	0
ENSG00000044012	0	0	0	0	0	0
ENSG00000197273	0	0.0962431	0	0.0994307	0	0
ENSG00000198815	12.4145	11.6309	11.1514	10.7768	11.5109	11.0298
ENSG00000227527	0.617319	0.579934	0.646046	0.256775	0.34568	0.396347
ENSG00000177181	2.25875	2.32318	2.36556	1.90876	1.91451	1.72109
ENSG00000235002	0	0	0.134457	0	0.143888	0
ENSG00000066185	0	0.074846	0.0729561	0	0	0.0954845
ENSG00000127125	8.84516	9.49355	10.7583	9.98273	8.13846	11.2684
ENSG00000186409	0.358285	0.158155	0.201596	0.234616	0.156515	0.240567
ENSG00000230116	0	0.0725329	0	0	0	0
ENSG00000236876	0	0	0	0	0	0
ENSG00000200254	0	0	0	0.528748	0	0
ENSG00000236180	0	0	0	0	0	0
ENSG00000171960	12.7969	14.3732	16.8197	14.3007	15.0721	16.9819
ENSG00000285728	1.3138	0.48296	0.993838	1.13651	0.503785	0.924202
ENSG00000234917	0.484963	0.637831	0.888179	0.188273	0.285143	0.523099
ENSG00000065978	482.892	799.615	799.061	536.974	826.28	741.867
ENSG00000164007	0.0161834	0.0456099	0.0889165	0	0	0
ENSG00000117385	9.60629	8.46607	8.01561	9.57428	9.10128	8.9755
ENSG00000164008	0.97468	0.842818	0.780966	0.741735	0.651229	0.547566
ENSG00000283580	0	0	0	0	0	0
ENSG00000228452	0	0	0	0	0	0
ENSG00000274386	0.466553	0.626142	0.500471	0.258752	0.404947	0.359459
ENSG00000177868	6.61099	7.38929	9.19118	6.6505	7.89706	7.11351
ENSG00000164010	1.62036	1.38904	1.18704	1.17949	0.982495	1.10147
ENSG00000228192	0.468647	0.507999	0.495172	0.489836	0.529904	0.388847
ENSG00000164011	7.95939	6.37459	6.97395	7.72502	7.0142	7.64339
ENSG00000233708	0.0594215	0.055823	0.0816201	0	0.029115	0
ENSG00000237090	0.0879224	0	0	0	0	0
ENSG00000225099	0.342394	0.964975	0.470304	0.249234	0.335528	0.846355
ENSG00000117394	12.8086	19.8461	20.927	14.5632	19.5531	20.198
ENSG00000284138	0	0	0	0	0	0.119084
ENSG00000227533	0.31191	0.0813947	0.206282	0.100909	0.135847	0.093455
ENSG00000283973	0	0.064275	0.062652	0	0	0.0614989
ENSG00000207256	0	0	0	0	0	0.489693
ENSG00000283136	0	0	0	0	0	0
ENSG00000277513	0	0	0	0	0	0
ENSG00000186973	1.03723	0.714574	0.886493	1.87916	1.21972	1.30527
ENSG00000117395	15.8295	29.6956	34.0274	19.7007	31.1846	37.1532
ENSG00000284410	0	0	0	0	0	0
ENSG00000243710	0.0809057	0.0570045	0.0740868	0.117785	0.0891937	0.0363616
ENSG00000199240	0	0	0	0	0	0
ENSG00000179178	0.027406	0	0	0	0	0
ENSG00000253313	0	0	0	0	0	0
ENSG00000066056	0.0261245	0.0163616	0	0.0169035	0	0.0156549
ENSG00000117400	0.105411	0.0247569	0.0965272	0.153461	0.103298	0.0236877
ENSG00000234694	0.705507	0.414239	0.323023	0.427958	0.25926	0.317078
ENSG00000117399	60.0659	105.037	105.083	84.7253	100.905	113.87
ENSG00000066322	20.7174	23.9408	25.6997	21.9579	24.6996	25.8119
ENSG00000283836	0	0	0	0	0	0
ENSG00000159479	10.5634	15.3108	14.7662	13.4536	14.9992	16.7616
ENSG00000229431	1.51513	0.749143	1.02232	1.00614	1.87547	0.430072
ENSG00000198198	3.18735	2.026	1.84521	2.89814	1.91395	1.62436
ENSG00000229372	0	0	0	0	0	0
ENSG00000274975	0	0	0	0	0	0
ENSG00000178922	0	0	0	0	0	0
ENSG00000229348	0.106959	0	0	0	0.104814	0
ENSG00000142949	26.3056	22.2894	20.4558	23.9677	20.7494	19.825
ENSG00000284989	0	0	0	0	0	0
ENSG00000066135	8.7574	7.80353	7.43103	8.0948	7.15702	6.52431
ENSG00000236200	1.26788	1.16274	1.54803	0.996161	0.769143	0.86831
ENSG00000126091	0.218503	0.16028	0.17816	0.165589	0.146659	0.156048
ENSG00000229444	0	0	0	0.120631	0	0
ENSG00000283414	0	0	0	0	0	0
ENSG00000233674	0	0	0	0	0	0
ENSG00000283477	0	0	0	0	0	0
ENSG00000224751	0	0	0	0.043122	0	0
ENSG00000117407	1.03076	0.412057	0.321322	1.06426	0.644736	0.72938
ENSG00000237950	1.88378	1.37643	1.15001	2.33618	2.5639	1.22291
ENSG00000117408	16.3536	17.0223	16.4245	18.7325	16.7336	17.2561
ENSG00000285649	0.0855565	0.241126	0.339498	0.221433	0.27947	0.33325
ENSG00000132768	9.74858	16.6717	16.4511	12.1648	18.9502	20.78
ENSG00000117410	25.5926	35.9867	35.7877	30.5847	31.6402	34.8326
ENSG00000117411	16.7212	21.2545	21.1565	17.8638	19.8994	21.545
ENSG00000159214	1.39417	1.32514	2.05768	1.83068	1.20548	1.76918
ENSG00000196517	18.6663	3.25878	4.95615	14.7609	4.07472	5.58604
ENSG00000230615	0.0582998	0.0273846	0.0667328	0.063656	0.0642721	0.0786055
ENSG00000227163	0	0	0	0	0	0
ENSG00000271647	0	0	0	0	0	0
ENSG00000239560	0	0	0	0	0	0
ENSG00000171872	0	0.0174904	0.0170487	0	0	0
ENSG00000233514	0.161924	0.152118	0.296553	0.314312	0	0.58219
ENSG00000283039	0	0.0173353	0	0.0179095	0	0
ENSG00000226804	0	0	0	0	0	0
ENSG00000200171	0	0	0	0	0	0
ENSG00000238037	0	0	0	0	0	0
ENSG00000227994	0	0	0	0	0	0
ENSG00000271329	0	0	0	0.0710755	0.21529	0.197477
ENSG00000178028	12.3894	12.8714	11.6789	11.7719	11.8145	11.7634
ENSG00000117419	24.3845	28.9247	31.3761	29.0092	30.7463	31.9274
ENSG00000233602	0.753377	0.176938	0.948586	1.27959	0.369135	0.592536
ENSG00000199385	0	0	0	0	0	0
ENSG00000187147	8.3404	7.40001	7.38949	8.27002	7.28861	6.91813
ENSG00000263381	0	0	0	0	0	0
ENSG00000126106	1.58761	1.4312	1.30695	1.2607	1.44577	1.81624
ENSG00000198520	0.708724	0.149806	0.146023	0.240749	0.0520884	0.0796309
ENSG00000199377	0	0.468054	0	0	0	0.447838
ENSG00000200169	0	0	0	0	0	0
ENSG00000142945	26.6361	31.7069	32.2971	27.2329	28.7028	29.6907
ENSG00000225721	0.228598	0.0715848	0.209332	0.295823	0.373357	0.342465
ENSG00000142937	373.854	385.414	383.444	365.012	368.565	387.411
ENSG00000264294	0	0	0	0	0	0
ENSG00000200913	6.16556	5.79217	6.67244	3.80801	10.9853	6.54964
ENSG00000202031	0	0	0	0	0	0
ENSG00000207421	0	0	0	0	0	0
ENSG00000281859	0	0	0	0	0	0
ENSG00000234093	0	0.14224	0	0	0.148373	0.136096
ENSG00000142959	0.0854312	0.187267	0.130385	0.276385	0.167436	0.0767911
ENSG00000173846	1.82635	1.63705	1.91792	1.74005	2.2659	2.21396
ENSG00000188396	0.152798	0.215317	0.27984	0.296598	0.149734	0.0686725
ENSG00000222009	2.59998	1.19793	1.27383	2.39484	1.15221	1.4439
ENSG00000117425	2.85293	1.6166	1.64835	1.84595	1.5088	1.46537
ENSG00000202444	0	0	0	0	0	0
ENSG00000226499	2.51881	0.676078	1.31801	2.79388	1.76308	0.646878
ENSG00000070785	8.93784	14.5776	14.4286	10.9138	15.0889	15.3766
ENSG00000253039	0.534794	0	0	0	0	0
ENSG00000229815	0	0	0	0.0674328	0	0.0624518
ENSG00000232369	0	0	0.542475	0.114992	0.116105	0.212996
ENSG00000268949	0.0372476	0	0.0682167	0	0.0365007	0.0669611
ENSG00000126107	9.56424	11.412	10.903	9.8398	10.4526	10.4959
ENSG00000126088	23.5936	27.4	27.3322	25.1557	26.8135	28.1625
ENSG00000162415	5.57279	4.37483	4.62634	5.69878	4.80912	4.02121
ENSG00000234315	0	0	0	0	0	0
ENSG00000281912	1.05677	0.640495	1.09256	1.48884	1.26941	1.01117
ENSG00000186603	0.894606	0.672343	0.393219	1.42395	0.876667	0.771965
ENSG00000132781	4.01143	2.96997	3.3183	4.42883	2.87883	3.04276
ENSG00000132773	6.82418	9.58641	10.1814	6.64387	10.3748	11.1979
ENSG00000070759	5.26423	3.51125	3.72789	3.66161	3.21557	3.29651
ENSG00000236872	0	0	0	0	0	0
ENSG00000280670	2.81208	3.07877	2.88486	2.46251	2.3413	3.15485
ENSG00000132763	4.6229	3.39163	3.76963	3.68556	3.40843	4.52143
ENSG00000117450	161.626	273.704	270.054	199.763	289.071	293.692
ENSG00000234379	0	0	0	0	0	0
ENSG00000117448	23.1228	20.8627	22.1659	24.5266	18.6691	20.2806
ENSG00000281133	5.46492	5.13397	3.89226	5.89334	5.95038	2.18321
ENSG00000280836	8.8322	4.97839	8.08781	8.57213	6.92408	4.76337
ENSG00000132780	35.1342	39.8649	39.0383	33.0708	39.3894	39.0391
ENSG00000281112	0	0	0	0	0	0
ENSG00000281825	0	0	0	0.819943	0	0.759378
ENSG00000159588	0.438553	0.329596	0.369464	0.391589	0.120333	0.252288
ENSG00000159592	12.2969	10.0934	10.7721	12.1479	10.2289	11.2647
ENSG00000225447	1.06819	0.573428	1.1179	0.888629	0.448615	0.137165
ENSG00000234329	0.443852	0.416972	0.203222	1.14875	0.724919	0.398963
ENSG00000159596	15.7502	15.9639	17.4649	15.6808	16.2775	16.2412
ENSG00000197429	4.51551	4.02034	4.81208	4.65741	4.47122	4.17197
ENSG00000230896	1.65715	1.09891	2.14232	2.08139	2.00601	2.45338
ENSG00000236111	0	0	0	0	0	0
ENSG00000086015	14.4973	11.631	11.439	12.4759	10.5951	10.9956
ENSG00000232467	0	0	0	0	0	0
ENSG00000117461	6.64739	6.90996	6.81472	7.14645	7.30812	6.34281
ENSG00000278139	0	0	0	0	0	0
ENSG00000226957	0	0	0.164498	0.261523	0	0
ENSG00000233114	0	0	0	0	0.252759	0
ENSG00000227857	0.171954	0	0.629847	0.333782	0	0.309127
ENSG00000117472	0.0985503	0.0925821	0.0225611	0.0956485	0.169005	0.0885834
ENSG00000250719	0	0	0	0	0	0
ENSG00000085998	12.33	15.4621	14.7961	13.3544	13.6219	14.938
ENSG00000171357	3.14415	1.06335	1.52595	1.80043	1.3865	1.27177
ENSG00000085999	21.161	18.5326	17.0675	20.2032	18.2291	17.4711
ENSG00000132128	19.3247	24.6004	23.2163	21.4773	23.7296	24.8347
ENSG00000173660	108.76	144.646	130.833	119.621	141.227	138.547
ENSG00000117481	5.16978	4.77263	5.11859	4.75699	4.41177	4.56649
ENSG00000225779	0.157547	0	0	0.152908	0.308776	0.141614
ENSG00000117480	5.66966	3.09715	2.94203	4.7894	3.64225	3.18988
ENSG00000232022	0.635662	0.199055	0.301823	0.365597	0.138426	0.10581
ENSG00000224863	0	0.0783438	0.114548	0.0404693	0	0.03748
ENSG00000197587	2.41544	1.79642	1.84322	2.32478	1.43993	1.5379
ENSG00000282881	0	0	0	0	0	0
ENSG00000269956	0.548355	0.335965	0.283818	0.254535	0.140181	0.407176
ENSG00000162456	0	0	0	0	0	0
ENSG00000079277	3.26496	2.95187	3.6314	2.79025	3.24904	3.1685
ENSG00000142961	1.34991	0.407293	0.505283	0.573794	0.280018	0.487127
ENSG00000123472	19.1707	21.7429	23.883	21.297	20.4868	20.1854
ENSG00000233647	0.250182	0.235032	0	0.121408	0.735497	0
ENSG00000186118	0.0391225	0.0735065	0.179126	0	0.038338	0.140663
ENSG00000228237	0.199632	0.468856	1.00544	0.387507	0.489072	0.538326
ENSG00000159658	22.7883	20.1623	21.1735	23.5486	20.8317	20.9505
ENSG00000236476	0	0	0	0	0	0
ENSG00000142973	0	0	0	0	0	0
ENSG00000154198	0	0	0	0	0.035747	0
ENSG00000238145	0	0	0	0	0	0.0439573
ENSG00000187048	0.0149852	0	0	0	0.0146847	0
ENSG00000259832	0	0	0	0	0	0
ENSG00000261196	0	0	0	0	0	0
ENSG00000261593	0	0	0	0	0	0
ENSG00000261290	0	0	0	0	0	0
ENSG00000186377	26.6983	11.8852	11.3337	14.899	5.02186	4.07167
ENSG00000186160	0.321251	0.0823081	0	0	0.0286191	0
ENSG00000225154	0.0484963	0.0455594	0	0	0	0
ENSG00000225506	0.506341	0.475677	1.04325	0.675719	0.620235	0.341349
ENSG00000162365	0.0604224	0	0.0138325	0.0146608	0.0148027	0
ENSG00000225514	0	0	0	0	0	0
ENSG00000224805	0.264565	0	0.161511	0.171183	0.17284	0.317078
ENSG00000162366	0	0	0	0	0	0
ENSG00000162367	0.173855	0.182541	0.177932	0.198513	0.110239	0.0735398
ENSG00000226252	0	0	0	0	0	0
ENSG00000123473	8.42687	9.55393	9.24679	8.45809	9.58198	9.25627
ENSG00000162368	24.9002	30.7718	31.8833	26.5955	30.3897	29.6199
ENSG00000225762	0.724131	1.02042	0.99465	0.351404	0.946147	0.976343
ENSG00000186790	0.0588516	0.0829314	0.134729	0.142797	0.173015	0.0528996
ENSG00000237424	7.94581	3.95057	4.48907	5.56967	4.73564	5.4924
ENSG00000186564	4.52624	2.63562	2.44347	3.9694	2.68817	2.58903
ENSG00000271355	0	0	0	0	0	0
ENSG00000229554	0	0	0	0	0	0
ENSG00000227883	0	0	0	0	0	0
ENSG00000227947	0	0	0	0.138837	0	0
ENSG00000269113	0.837012	0.412625	0.493271	0.619329	0.462901	0.394803
ENSG00000223814	0	0	0	0	0	0
ENSG00000225028	0.0645186	0	0.0295404	0	0	0
ENSG00000226133	0	0	0	0	0	0
ENSG00000231413	0	0	0	0	0	0
ENSG00000237180	0	0	0	0	0	0
ENSG00000242267	0.0870038	0	0.159342	0.112589	0.0852592	0
ENSG00000279096	0	0	0	0	0	0
ENSG00000223720	0	0	0.0819962	0	0	0
ENSG00000117834	0.282786	0.13283	0.0470823	0.124754	0.100769	0.0577697
ENSG00000272491	0.139289	0.0327135	0.0318874	0	0.034124	0.0313005
ENSG00000279214	0	0	0	0	0	0
ENSG00000132122	1.82563	1.33702	1.58188	1.84808	1.21192	1.19104
ENSG00000224986	0	0	0	0	0	0
ENSG00000206700	0	0	0	0	0	0
ENSG00000235105	1.66948	1.82977	1.69863	2.0254	2.22678	2.04253
ENSG00000223175	0	0	0	0	0	0
ENSG00000232514	0	0	0.112615	0	0	0
ENSG00000186094	0	0	0	0	0	0
ENSG00000162373	0.43624	0.589118	0.649143	0.714478	0.587802	0.465643
ENSG00000229846	0	0	0	0	0	0
ENSG00000230114	0	0	0	0	0	0
ENSG00000225623	0	0	0	0	0	0
ENSG00000237478	0	0	0	0	0	0
ENSG00000215887	0	0	0	0	0	0
ENSG00000279324	0	0	0	0	0	0
ENSG00000233595	0	0	0	0	0	0
ENSG00000162374	0.0251153	0	0.0306647	0.0568767	0.0246116	0.0225752
ENSG00000230828	0	0	0	0	0	0
ENSG00000237337	0	0	0	0	0	0
ENSG00000233407	0	0	0	0.226304	0	0
ENSG00000284696	0	0	0	0.0162156	0	0
ENSG00000284645	0	0	0	0	0	0
ENSG00000234080	0	0	0	0	0	0
ENSG00000229316	0	0	0	0	0	0
ENSG00000225671	0	0.0920375	0	0	0	0.440312
ENSG00000142700	1.87982	1.52825	1.35725	2.08761	1.85984	2.14463
ENSG00000284700	0.12536	0.117768	0.0573974	0.121669	0.18427	0.338046
ENSG00000185104	8.49085	11.7218	10.0958	9.72554	11.4626	11.1808
ENSG00000225767	0.11589	0	0.318367	0.112477	0.227132	0.104169
ENSG00000207194	0	0	0	0.523853	0	0
ENSG00000230585	0.143755	0	0.131639	0.0697609	0	0.064608
ENSG00000237130	0	0.148006	0	0	0	0
ENSG00000123080	24.8947	29.7743	28.5238	28.612	28.3036	28.3146
ENSG00000265538	0	0	0	0	0	0
ENSG00000275816	0	0	0	0	0	0
ENSG00000204006	0	0	0	0	0	0.0468668
ENSG00000200262	0	0	0	0	0	0
ENSG00000213478	0	0	0	0	0	0
ENSG00000203356	0	0	0.0451222	0.0717364	0	0.0442917
ENSG00000123091	28.2127	27.7144	29.5451	27.4907	25.1403	27.1216
ENSG00000233406	0	0.12589	0.184067	0	0	0.18068
ENSG00000236434	0.268012	0.377671	0.122712	0.78036	0.262637	0.120453
ENSG00000085831	3.69854	3.35172	3.79165	4.26647	3.3254	3.99051
ENSG00000261664	0.0954051	0.0896274	0.0436821	0.23149	0.093492	0.343025
ENSG00000085832	12.2383	11.7989	12.7135	11.4293	11.0869	11.6415
ENSG00000232027	0.0610393	0.0573428	0.0558948	0	0.0598153	0.0548661
ENSG00000206595	0	0.511798	0	0	0	0
ENSG00000238140	0	0	0	0.0834455	0.0842531	0.0772819
ENSG00000227070	1.22463	0.575235	0.560709	0.594287	0.360023	0.880624
ENSG00000252032	0	0	0	0	0	0
ENSG00000227742	0.0862315	0.0405047	0	0	0.0845024	0.0775105
ENSG00000117859	14.6848	13.6288	14.4001	15.0842	13.9705	14.4432
ENSG00000236973	0	0	0	0.0565761	0	0
ENSG00000232846	0	0	0	0	0	0
ENSG00000212624	0	0	0	0	0	0
ENSG00000078618	24.5719	29.7704	31.186	25.0846	29.8817	31.3624
ENSG00000266993	1.15367	0.361269	0.645602	0.715365	0.471058	0.748941
ENSG00000272175	0	0	0	0	0.204013	0
ENSG00000283899	0	0	0	0	0	0
ENSG00000230604	0	0	0	0	0	0
ENSG00000169213	5.25559	2.55393	2.531	3.7133	2.67294	2.61088
ENSG00000200839	0	0	0.423647	0	0	0
ENSG00000229032	0	0	0	0	0	0
ENSG00000264613	0	0	0	0	0	0
ENSG00000117862	5.2621	5.10013	5.59624	4.75392	5.06742	5.08432
ENSG00000285839	0	0	0	0	0	0
ENSG00000198841	2.41468	3.73815	3.11433	2.93773	2.79952	3.51556
ENSG00000223390	0	0.0718666	0	0	0	0.206288
ENSG00000228369	0.745429	0.140057	0	0.723479	0.292193	0.536032
ENSG00000134717	18.1015	16.6142	18.7121	19.9923	17.9851	20.717
ENSG00000157077	12.5636	10.9638	11.1923	11.1711	11.0727	9.91296
ENSG00000241745	0	0	0	0	0	0
ENSG00000228407	0	0.322131	0.156999	0	0.504032	0.616436
ENSG00000223429	0.0693133	0	0	0	0.0679235	0
ENSG00000224255	0.0825673	0.0775671	0	0.0801361	0.0809117	0.0742169
ENSG00000236004	0	0	0	0	0	0
ENSG00000237663	0	0	0	0	0	0
ENSG00000213735	0.104843	0	0	0	0	0
ENSG00000154222	6.05869	7.83989	7.03656	6.069	7.4234	7.31252
ENSG00000272100	1.49086	0.840343	0.409562	0.144696	0.876578	1.07206
ENSG00000224680	1.23153	1.83184	2.06752	2.88857	3.41937	1.38373
ENSG00000085840	12.759	16.4617	15.5726	13.0284	17.66	18.2402
ENSG00000134748	16.5152	21.39	21.0292	18.2387	21.6056	21.3182
ENSG00000134744	9.66204	7.29534	7.39781	8.22499	7.26784	7.34252
ENSG00000272371	0.383503	0	0.11706	0	0	0
ENSG00000236290	0.165839	0	0	0	0	0
ENSG00000116157	0.0689444	0	0	0	0	0
ENSG00000182183	0.0464853	0	0.0425674	0.0451165	0	0.062676
ENSG00000162377	14.0658	15.344	15.3923	13.3935	17.3908	16.7444
ENSG00000233664	0	0	0	0	0	0
ENSG00000239640	0	0	0	0	0	0
ENSG00000162378	11.1778	10.4541	10.2943	9.97224	10.3684	9.89396
ENSG00000252018	0	0	0	0.401249	0	0
ENSG00000228929	1.6655	2.76821	2.46367	1.24343	5.02186	2.7638
ENSG00000206627	0	0	0	0	0	0.49902
ENSG00000203995	7.28967	6.34655	6.32276	6.72549	7.13133	5.57012
ENSG00000242391	1.53401	0.720557	0.842835	1.33996	0.450976	0.689436
ENSG00000121310	12.7496	6.5164	7.24674	9.85143	6.5703	7.16317
ENSG00000230953	15.9888	6.25855	7.93068	15.1947	6.85484	3.59294
ENSG00000231866	0	0	0	0	0	0
ENSG00000116171	9.30715	10.0887	10.2196	9.37371	9.49882	10.0946
ENSG00000264834	0	0.553155	0	0	0	0
ENSG00000266188	0	0	0	0	0	0
ENSG00000265815	0	0	0	0	0	0
ENSG00000237279	0	0	0	0	0	0
ENSG00000236360	0	0	0	0	0	0
ENSG00000226147	0	0	0	0	0	0
ENSG00000174348	0.154654	0.022352	0.0108938	0.127008	0.0233158	0
ENSG00000232993	0	0	0	0	0	0
ENSG00000227644	0	0	0	0	0	0
ENSG00000162383	0.0107809	0	0	0.0104635	0	0
ENSG00000235563	0.0311558	0	0	0	0	0
ENSG00000277397	0	0	0.0743448	0	0	0
ENSG00000157184	2.11375	2.101	2.3697	2.29509	1.99485	2.28097
ENSG00000236723	0.142525	0.133893	0.0870082	0.0461093	0.186222	0.12811
ENSG00000162384	7.54802	8.59209	8.54168	7.31315	7.94409	8.40783
ENSG00000259818	0.0649318	0.0152499	0.104054	0.015755	0.0318149	0.0437737
ENSG00000162385	18.8465	25.9775	25.4675	21.6559	28.8937	27.2909
ENSG00000226754	0.246793	0.556434	0.542383	0.287431	0.532058	0.354934
ENSG00000157193	6.50913	6.51513	5.95013	5.74967	7.05209	6.17247
ENSG00000234578	0	0	0	0	0	0
ENSG00000228838	0	0.243388	0.0790808	0	0	0.0776253
ENSG00000225030	0	0.231065	0.22523	0.716153	0	0.663254
ENSG00000232762	0.155033	0.145645	0.709834	0.376171	0.379811	0.487739
ENSG00000225675	0.205617	0.193165	0.470719	0	0	0.739289
ENSG00000285954	0.131586	0	0.180743	0	0	0
ENSG00000226938	0	0	0	0	0	0
ENSG00000230138	0	0	0	0	0	0
ENSG00000236253	0	0	0	0	0	0
ENSG00000143006	0	0	0.0437537	0	0	0
ENSG00000174332	0.54304	0.598111	0.685892	0.399831	0.642251	0.437624
ENSG00000239007	0	0	0	0	0	0
ENSG00000058804	25.8144	30.7458	32.8386	26.729	30.8256	32.4587
ENSG00000201003	0.428621	1.20799	0.392497	2.496	0.420027	1.54109
ENSG00000229687	0	0	0	0	0	0
ENSG00000058799	11.4785	12.1841	14.195	11.3589	12.5992	13.3774
ENSG00000211452	0.613068	0.28797	0.374265	0.272716	0.450581	0.22961
ENSG00000081870	8.23229	10.8306	10.3097	10.2802	11.8978	11.7392
ENSG00000116212	14.6517	16.0585	16.1622	16.6138	16.4429	15.6474
ENSG00000219102	0.109675	0.360617	0.301296	0.479007	0.429905	0.147875
ENSG00000203985	0.0490884	0	0.0224756	0	0.0481041	0
ENSG00000116209	12.7875	11.9712	11.0388	12.479	11.7007	12.5423
ENSG00000280378	0.13286	0.187222	0.152078	0.161185	0.162745	0.119424
ENSG00000116205	2.95103	2.16025	1.98287	2.43173	1.94825	1.87317
ENSG00000283749	0	0	0	0	0	0
ENSG00000225183	0.244927	0.230094	0.224284	0.475429	0	0.220156
ENSG00000279049	0	0	0	0	0	0
ENSG00000256407	0.0295003	0.0277137	0	0.0143158	0	0.0265168
ENSG00000157211	0	0	0	0	0	0
ENSG00000280425	0.0117312	0.055104	0	0.0341574	0.011496	0.0105448
ENSG00000215883	2.9192	2.34976	2.75091	2.60506	2.1183	2.17783
ENSG00000116221	52.7125	81.4238	82.9906	65.2323	81.0577	86.7255
ENSG00000157216	9.75817	10.2254	9.30338	9.79555	10.9832	12.1194
ENSG00000198711	0.577594	0.459135	0.345828	0.366537	0.326545	0.49921
ENSG00000225632	0	0	0	0	0	0
ENSG00000232245	0	0	0	0	0.19766	0
ENSG00000235741	0	0	0	0	0	0
ENSG00000237173	0	0	0	0	0	0
ENSG00000227453	0	0	0	0	0	0
ENSG00000162390	0.28645	0.190614	0.191266	0.440191	0.362578	0.252115
ENSG00000162391	0.0872207	0.109252	0.0266232	0.11287	0.170944	0.0522664
ENSG00000230728	0	0	0	0	0	0
ENSG00000184313	0.00641423	0	0.00587363	0	0	0.00576553
ENSG00000271723	0	0	0	0	0	0
ENSG00000243725	0.247913	0.496851	0.438902	0.208531	0.599256	0.51996
ENSG00000162396	4.47067	4.73658	5.0946	4.43545	4.40536	5.49198
ENSG00000006555	0	0	0	0	0	0
ENSG00000237453	0	0	0	0	0	0
ENSG00000162398	0.0328039	0	0.0300391	0	0	0
ENSG00000116133	43.8816	65.2795	60.7373	51.1613	69.4838	64.6259
ENSG00000242396	0.304135	0.190478	0.092834	0.0983932	0.198691	0.182251
ENSG00000233203	0.609595	0.644263	0.279109	0.665601	0.224014	0.616436
ENSG00000284601	0	0	0	0	0	0
ENSG00000143001	0.0531381	0	0.0973191	0.15472	0	0
ENSG00000233271	0	0	0	0	0	0
ENSG00000162399	0	0	0	0	0	0.0102478
ENSG00000169174	0.198951	0.109942	0.0321499	0.340751	0.0688098	0.147272
ENSG00000162402	14.5682	15.342	15.5441	13.8701	14.6691	13.6289
ENSG00000231090	0	0	0	0.0660935	0	0
ENSG00000231095	0	0	0	0	0	0
ENSG00000265822	0	0	0	0	0	0
ENSG00000234810	0	0	0	0	0	0
ENSG00000231900	0	0	0	0	0	0
ENSG00000232198	0	0	0	0	0	0
ENSG00000199831	0	0	0	0	0	0
ENSG00000252162	0	0	0	0	0	0
ENSG00000272051	0	0	0	0	0	0
ENSG00000233079	0	0	0	0	0	0
ENSG00000230250	0	0	0	0	0	0
ENSG00000227104	0	0	0	0	0	0
ENSG00000235612	0	0	0	0	0	0
ENSG00000260971	0.0147988	0.0208539	0.0338789	0	0	0.0133021
ENSG00000284686	0	0.123757	0.0402106	0	0.0215155	0
ENSG00000229871	0	0	0.059977	0.0635686	0	0
ENSG00000223956	0.641753	0	0.489721	0	0	0
ENSG00000162407	4.8522	3.98855	4.1302	5.39431	4.1065	4.27226
ENSG00000236776	0	0.238097	0	0	0	0
ENSG00000224980	0	0	0	0	0	0
ENSG00000225475	0	0	0	0	0	0
ENSG00000162409	12.1271	8.30158	8.75393	9.33862	7.32213	7.94863
ENSG00000187889	0.0754922	0.0827404	0.0345648	0.0366346	0.0616486	0.0226191
ENSG00000229913	0	0	0	0	0	0
ENSG00000157131	0	0	0	0	0	0
ENSG00000021852	0	0	0	0	0	0
ENSG00000236341	0	0	0	0	0	0
ENSG00000173406	0.278025	0.174125	0.10608	0.187388	0.0756805	0.0971859
ENSG00000227935	0	0	0	0.0799097	0	0
ENSG00000236888	0	0	0	0	0	0
ENSG00000226759	0	0	0	0.026096	0	0
ENSG00000229887	0	0	0	0	0	0
ENSG00000223416	0	0	0	0.162575	0.164148	0
ENSG00000235038	0	0	0	0.0912517	0	0
ENSG00000230546	0	0	0	0	0	0
ENSG00000233216	0	0	0	0	0	0
ENSG00000162600	2.66534	3.75589	4.43633	3.56073	3.36473	4.24194
ENSG00000270209	0	0	0	0	0	0
ENSG00000264128	0	0	0	0	0	0
ENSG00000184292	0.0743843	0	0	0	0	0
ENSG00000185839	0.42241	1.50795	1.85668	2.45983	1.98691	1.06313
ENSG00000162601	11.2894	9.99912	10.0094	10.5012	9.80394	9.17448
ENSG00000283445	0	0	0	0	0	0.0221131
ENSG00000177606	78.2174	75.77	88.4985	68.2749	63.901	78.418
ENSG00000234807	0	0.129411	0.0630715	0.0222828	0	0.0619107
ENSG00000272226	0.217916	0.204719	0.498874	0.211499	0.320319	0.0979385
ENSG00000231740	0	0	0	0	0	0
ENSG00000232453	0.200318	0.345009	0.36687	0.226823	0	0.0600196
ENSG00000237352	0.00866159	0	0.00793158	0	0	0.0155712
ENSG00000228121	0	0.0668649	0	0	0.069748	0.0639769
ENSG00000241042	0	0	0	0	0	0
ENSG00000235215	0	0	0	0	0	0
ENSG00000224609	0.126861	0.190685	0.0580844	0.184688	0.0745902	0.0798215
ENSG00000270457	0	0	0	0	0	0
ENSG00000172456	0.172378	0.193427	0.184158	0.218423	0.159537	0.202289
ENSG00000266150	0	0	0	0	0	0
ENSG00000226883	0.0760007	0.0713981	0.0695952	0	0	0
ENSG00000134709	11.3946	9.15677	9.17041	9.68608	9.34028	8.64498
ENSG00000134716	1.11126	1.06228	1.23184	1.15423	0.783301	1.33183
ENSG00000265535	0	0	0	0	0	0
ENSG00000162598	0	0.0123841	0.0724281	0.0127942	0.0129181	0.0118492
ENSG00000229332	0	0	0	0	0	0
ENSG00000238242	0	0	0	0	0	0
ENSG00000226476	0.00548791	0	0	0.0159789	0	0.00493288
ENSG00000231252	0.0136039	0	0	0.0396099	0	0
ENSG00000162599	4.51456	3.23376	3.5989	4.43367	3.19981	3.56158
ENSG00000237928	0	0	0	0	0	0
ENSG00000270742	0.124027	0.116516	0.34072	0.120375	0.486159	0.222966
ENSG00000237853	0.207693	0.195115	0.0633961	0	0.0678428	0
ENSG00000284808	0	0	0	0	0	0
ENSG00000223920	0	0	0	0	0.0798932	0
ENSG00000162604	5.52701	3.67333	4.2483	4.38988	3.66602	3.46718
ENSG00000271200	0.136516	0	0.375032	0.39749	0	0
ENSG00000132849	6.72382	4.25219	4.32735	5.92657	4.41172	4.26519
ENSG00000200575	0	0	0	0	0	0
ENSG00000212360	0	1.05312	0	0	0	0
ENSG00000236646	0	0	0	0	0	0
ENSG00000242860	0	0	0	0	0	0
ENSG00000263908	0	0	0	0	0	0
ENSG00000283690	0	0	0	0	0	0
ENSG00000234204	0	0	0	0	0	0
ENSG00000234088	0	0	0	0	0	0
ENSG00000240563	0	0	0	0	0	0.0136132
ENSG00000237227	0	0	0	0	0	0
ENSG00000200174	0	0	0	0	0	0
ENSG00000132854	0.116975	0.0183152	0.0357054	0.0756871	0	0.0525723
ENSG00000201153	0	0	0	0	0	0
ENSG00000162607	37.7814	39.3215	37.4145	38.726	38.605	36.9471
ENSG00000116641	3.96554	4.53344	4.3975	4.22637	4.53369	4.06377
ENSG00000270549	0	0	0	0	0.480031	0
ENSG00000132855	0.0179362	0.01685	0.0492734	0	0	0
ENSG00000278967	0	0.0602115	0.0586911	0	0.0942116	0
ENSG00000213703	0	0	0.0977647	0.103619	0	0
ENSG00000235545	0.854451	0.535137	0.521624	0.691076	0.744282	0.213343
ENSG00000125703	7.34748	6.88491	7.77522	6.69453	6.55728	8.28919
ENSG00000234318	0	0.122511	0	0.126568	0	0
ENSG00000237163	0	0	0	0	0	0
ENSG00000229537	0	0	0	0	0	0
ENSG00000227485	0	0	0	0	0	0
ENSG00000229225	0.37129	0	0	0	0	0
ENSG00000203605	0	0	0	0.0687437	0	0
ENSG00000224209	0.0129827	0	0	0	0	0.0233395
ENSG00000252259	0	0	0	0	0	0
ENSG00000228734	0	0	0	0.131725	0	0
ENSG00000223683	0	0	0	0	0	0
ENSG00000230798	6.99703	5.3493	4.63978	5.94798	4.06675	5.03151
ENSG00000187140	4.91826	3.93785	4.04313	5.12602	4.02549	3.03933
ENSG00000275836	0	0	0	1.88587	0	0
ENSG00000252784	0	0	0	0	0	0
ENSG00000236674	0	0	0	0	0	0
ENSG00000088035	4.81528	5.46029	5.98286	5.80584	5.64377	5.56767
ENSG00000142856	8.32903	9.33939	9.96405	9.09943	8.94682	9.74227
ENSG00000203965	2.88192	2.31377	2.27406	2.41024	2.05301	1.89232
ENSG00000264271	0	0	0	0	0	0
ENSG00000251720	0	3.65082	1.77932	2.8288	1.90412	2.61985
ENSG00000116652	0.213165	0.138639	0.120123	0.190974	0.257097	0.117912
ENSG00000276884	0	0	0	0	0	0
ENSG00000278287	0	0	0	0	0	0
ENSG00000277565	0	0	0	0	0	0
ENSG00000275823	0	0	0	0	0	0
ENSG00000277689	0	0	0	0	0	0
ENSG00000274199	0	0	0	0	0	0
ENSG00000079739	13.8673	15.3808	14.5235	14.4127	13.7384	14.4304
ENSG00000244256	1.14674	0	1.40012	1.11297	0	0.858969
ENSG00000185483	4.35783	3.46597	3.34665	4.11156	3.10501	3.11339
ENSG00000177452	0	0	0	0	0	0
ENSG00000228056	0	0	0	0	0	0
ENSG00000207190	0	0	0	0	0	0
ENSG00000200508	0	0	0	0	0	0
ENSG00000223949	0.0164482	0.0154521	0.0451858	0.0159639	0	0
ENSG00000284928	0	0	0	0	0	0
ENSG00000177414	0	0	0	0	0	0.0570153
ENSG00000238653	0	0	0	0	0	0
ENSG00000158966	10.5145	8.74957	9.51078	8.9148	8.15667	8.44583
ENSG00000264470	0	0	0	0	0	0
ENSG00000162437	12.6861	10.6187	11.2387	12.8718	11.66	10.7298
ENSG00000162434	22.0731	21.2738	21.2859	21.5844	20.4187	20.8941
ENSG00000234784	0	0	0	0	0	0
ENSG00000233877	0	0	0	0	0	0
ENSG00000226891	0.104639	0.0491509	0.0239549	0.0761682	0.0341802	0.0548661
ENSG00000185031	0.0393868	0	0.108202	0.114681	0	0.141614
ENSG00000272506	0.0943245	0	0.0863747	0.0915471	0	0.0847849
ENSG00000212257	2.17916	0	0.498874	0	0	0
ENSG00000265996	1.98725	1.2446	1.81976	1.28582	2.59653	2.97711
ENSG00000199135	0	0	0	0	0	0
ENSG00000231485	0	0	0	0.182503	0	0
ENSG00000235804	0	0	0	0	0	0
ENSG00000234496	0	0	0	0	0	0
ENSG00000162433	11.8308	10.2544	10.8689	11.3331	9.52814	9.79075
ENSG00000231622	0	0	0	0	0	0
ENSG00000116675	6.03546	6.0322	6.04108	5.573	6.85089	6.51008
ENSG00000229294	0	0.106958	0	0	0	0
ENSG00000234144	0.257932	0.242311	0.236193	0	0	0
ENSG00000222624	0.305196	0	0	0	0	0
ENSG00000213625	13.3682	8.97195	11.1509	12.2832	9.71876	9.98516
ENSG00000116678	5.54215	2.38411	2.90137	4.34894	2.16537	2.25349
ENSG00000237852	0	0	0.126193	0	0	0
ENSG00000224570	0	0	0	0	0.0635767	0
ENSG00000285079	0	0	0	0	0	0
ENSG00000239319	0	0	0	0	0	0
ENSG00000184588	0.31021	0.20273	0.111156	0.307621	0.310598	0.375824
ENSG00000227466	0	0	0	0	0	0
ENSG00000223152	0	0	0	0	0	0
ENSG00000118473	0.0111277	0	0.00509493	0	0.00545229	0.0150035
ENSG00000264720	0	0	0	0	0	0
ENSG00000248458	0	0	0	0	0	0
ENSG00000152760	0	0	0	0	0	0
ENSG00000172410	0.081528	0	0	0	0	0.146565
ENSG00000152763	0.286941	0.155204	0.199059	0.194101	0.187458	0.226658
ENSG00000231080	0	0	0	0	0	0
ENSG00000198160	6.58107	6.74517	6.5684	5.8402	6.51816	7.16953
ENSG00000116704	7.05716	7.22522	7.92637	7.82259	7.42552	7.64443
ENSG00000203963	0	0	0	0	0	0
ENSG00000252433	0	0	0	0	0	0
ENSG00000275678	0	0	0	0	0	0
ENSG00000162594	0	0	0	0	0	0
ENSG00000253074	0	0	0	0	0	0
ENSG00000252116	0	0	0	0	0	0
ENSG00000228523	0	0	0	0	0	0
ENSG00000081985	0.724867	0.383819	0.518951	0.831437	0.45203	0.308009
ENSG00000142864	98.6933	121.546	129.228	99.3103	118.482	126.617
ENSG00000223263	2.77583	7.30165	3.05026	3.77174	1.6321	3.99216
ENSG00000235200	0	0	0	0	0	0
ENSG00000207504	0	0	0	0	0	0
ENSG00000238139	0	0	0	0	0	0
ENSG00000242482	0	0	0	0	0	0
ENSG00000232048	0	0	0	0	0	0
ENSG00000116717	24.5116	23.4507	25.2579	24.6375	24.3514	29.1995
ENSG00000172380	28.3195	22.3501	23.2886	27.1623	24.6923	24.0689
ENSG00000238778	0	0	0	0	0	0
ENSG00000232284	0.605637	0.363502	0.585403	0.424525	0.445119	0.483898
ENSG00000235055	0	0	0	0	0	0
ENSG00000162595	0.371654	0.188002	0.287972	0.166482	0.476264	0.359764
ENSG00000228431	0.453051	0	0.138289	0.14657	0	0
ENSG00000116729	33.3007	25.4512	23.1841	32.6746	25.4366	23.1091
ENSG00000234383	0.613605	0.205873	0.280945	0.467922	0.1718	0.275774
ENSG00000221203	0	0	0	0	0.614233	0
ENSG00000229133	0	0	0	0.19442	0	0.0900294
ENSG00000225242	0	0	0	0	0	0
ENSG00000237622	0	0	0	0	0	0
ENSG00000229440	0	0	0	0	0	0
ENSG00000116745	0	0	0	0	0	0.040151
ENSG00000024526	17.9597	18.3098	21.3102	20.804	17.9963	19.1075
ENSG00000233589	2.12525	1.59723	1.66811	2.1216	2.02313	1.30993
ENSG00000234264	0.280477	0.0878305	0.0428064	0.181479	0.366471	0.462204
ENSG00000225167	0	0	0	0	0	0
ENSG00000285041	0	0.0207748	0.0405004	0.0858514	0.0216706	0.0198775
ENSG00000285407	0.0207447	0	0	0.0402677	0	0.0186467
ENSG00000285473	0	0	0	0	0	0
ENSG00000223883	0.0929705	0	0	0	0	0
ENSG00000235446	0	0	0	0	0	0
ENSG00000229639	0	0	0	0	0	0
ENSG00000033122	0.736017	0.325165	0.284166	0.776126	0.405464	0.246751
ENSG00000270615	0	0	0	0	0	0
ENSG00000240692	0	0	0	0.186106	0	0
ENSG00000229359	0	0	0.0535939	0	0	0
ENSG00000237919	0.06149	0.0577662	0	0.0596794	0	0
ENSG00000066557	14.4316	18.6276	20.8965	14.2029	17.6085	17.278
ENSG00000244389	0	0	0.179729	0	0	0
ENSG00000116754	45.5855	38.9276	39.6456	43.5288	36.4666	37.9698
ENSG00000228988	0	0.11983	0	0.247598	0	0
ENSG00000118454	12.1406	11.8225	11.7214	10.9089	12.2701	10.7873
ENSG00000197568	5.81971	3.62991	4.19348	5.23167	4.02016	4.84523
ENSG00000226088	0.506891	0.380955	0.92834	1.3775	0.496727	1.0935
ENSG00000116761	8.95879	3.76576	5.72713	6.37477	3.99913	4.60157
ENSG00000278636	0	0	0	0	0	0
ENSG00000271992	2.00146	0.940126	0.916387	1.21408	1.10325	0.899521
ENSG00000233020	0	0	0.0552012	0.234027	0	0.0541852
ENSG00000237033	0	0	0	0	0	0
ENSG00000229051	0.0279446	0	0	0	0	0
ENSG00000226208	0	0	0	0	0	0
ENSG00000050628	0.235513	0.102116	0.0774178	0.322354	0.177531	0.16827
ENSG00000235782	0.0778271	0	0	0	0.0762665	0
ENSG00000269933	0	0	0.0822489	0	0	0
ENSG00000235079	0.0602818	0.226525	0.0552012	0.351041	0.059073	0.162556
ENSG00000132485	29.8292	27.7267	31.5808	29.6194	27.7667	31.8601
ENSG00000207721	6.10038	6.36771	4.96554	3.28931	3.32114	3.04634
ENSG00000229956	0.0940076	0.0515168	0.0502159	0.0608263	0.0690919	0.0492917
ENSG00000226324	0	0	0	0	0	0
ENSG00000172260	0.017393	0.0122547	0.00398176	0.00422021	0	0.00781696
ENSG00000231985	0	0	0	0	0	0
ENSG00000271618	0	0	0	0	0	0
ENSG00000228853	0	0	0	0	0	0
ENSG00000233994	0	0.450348	0.175591	0.186106	0.0939533	0
ENSG00000227207	0	0	0	0	0	0
ENSG00000212366	0	0	0	0	0	0
ENSG00000225087	0	0	0	0	0	0
ENSG00000227016	0	0	0	0	0	0
ENSG00000285808	0	0	0	0	0	0
ENSG00000280317	0	0	0	0	0	0
ENSG00000229636	0	0	0	0	0	0
ENSG00000251825	0	0	0	0	0	0
ENSG00000233973	0	0	0	0	0.0369812	0
ENSG00000223479	0	0	0	0	0	0
ENSG00000200601	0	0	0	0	0	0
ENSG00000285778	0	0	0	0	0	0
ENSG00000252005	0	0	0	0	0	0
ENSG00000162620	0.0798619	0.0687733	0.158451	0.135643	0.0521737	0.107678
ENSG00000254685	1.86871	2.41059	3.03931	2.13852	1.91323	2.31901
ENSG00000259030	0	0	0.0485465	0.0285853	0	0.0105896
ENSG00000116783	0	0	0	0	0	0
ENSG00000237324	0	0	0	0.0401819	0	0
ENSG00000233894	0	0	0	0	0	0
ENSG00000162621	0.0151056	0	0	0	0	0
ENSG00000178965	0.00664	0	0.00608037	0.012889	0	0.00596846
ENSG00000234497	0	0	0	0	0	0
ENSG00000272864	0.206345	0	0.566862	0.100135	0	0.278215
ENSG00000116791	6.80674	8.37857	10.4276	7.28495	8.87968	10.8257
ENSG00000162623	9.2187	10.0841	10.9743	8.71438	9.72686	10.1139
ENSG00000229943	0	0	0	0	0	0
ENSG00000261213	0	0	0	0	0	0
ENSG00000224127	0.0870038	0	0	0	0	0
ENSG00000162624	0.366435	0.0688488	0.174487	0.256065	0.258543	0.276676
ENSG00000224149	0	0	0	0	0	0
ENSG00000206999	0	0	0	0	0	0
ENSG00000137968	10.7534	6.52906	7.06756	9.31408	6.22112	5.91433
ENSG00000224493	0	0	0	0.168884	0	0
ENSG00000252338	0	0	0.508377	0	0	0
ENSG00000213579	0	0	0	0	0	0
ENSG00000230863	0.188998	0.177553	0.0741726	0.104819	0.0529168	0.0242692
ENSG00000117054	12.5652	12.8004	13.4146	12.1834	11.0712	12.0394
ENSG00000181227	0.990198	0.525783	0.55193	0.459628	0.675021	0.541772
[truncated: 57,275 more rows]
