# Supplementary material for: A paracrine-to-autocrine shunt of GREM1 fuels colorectal cancer metastasis via ACVR1C
Source: Mol Cancer. 2026 Jan 24;25:174. doi: 10.1186/s12943-025-02554-w (PMC13371181; doi:10.1186/s12943-025-02554-w)
Supplement: Supplementary file 3 — Supplementary Material 3. [file 12943_2025_2554_MOESM3_ESM.xlsx]

## Sheet: gene_fpkm HCT116
gene_id	G-CM1	G-CM2	G-CM3	V-CM1	V-CM2	V-CM3	gene_name	gene_chr	gene_start	gene_end	gene_strand	gene_length	gene_biotype	gene_description	tf_family
ENSG00000210135	4969.06	10557.9	5491.33	15632.8	20067.8	10949.3	MT-TN	MT	5657	5729	-	73	Mt_tRNA	mitochondrially encoded tRNA-Asn (AAU/C) [Source:HGNC Symbol;Acc:HGNC:7493]	-
ENSG00000198712	7566.69	7771.81	11274.8	9313.12	7921.7	7867.56	MT-CO2	MT	7586	8269	+	684	protein_coding	mitochondrially encoded cytochrome c oxidase II [Source:HGNC Symbol;Acc:HGNC:7421]	-
ENSG00000140988	3863.88	9513.89	4623.54	7689.66	6451.91	6219.79	RPS2	16	1962058	1964841	-	2388	protein_coding	ribosomal protein S2 [Source:HGNC Symbol;Acc:HGNC:10404]	-
ENSG00000210140	2524.72	4482.56	2967.26	9869.55	10893.3	6010.72	MT-TC	MT	5761	5826	-	66	Mt_tRNA	mitochondrially encoded tRNA-Cys (UGU/C) [Source:HGNC Symbol;Acc:HGNC:7477]	-
ENSG00000087086	3857.51	7625.94	4516.71	5722.83	6272.19	6076.51	FTL	19	48965309	48966879	+	871	protein_coding	ferritin light chain [Source:HGNC Symbol;Acc:HGNC:3999]	-
ENSG00000187608	6670.87	14893.4	9840.17	588.41	620.385	646.181	ISG15	1	1001138	1014540	+	867	protein_coding	ISG15 ubiquitin like modifier [Source:HGNC Symbol;Acc:HGNC:4053]	-
ENSG00000240342	3026.88	9460.54	4071.07	5268.09	5782.86	5102.31	RPS2P5	12	118246084	118246962	+	879	processed_pseudogene	ribosomal protein S2 pseudogene 5 [Source:HGNC Symbol;Acc:HGNC:31386]	-
ENSG00000198804	4690.99	4056.1	7063.27	5518.14	4829.48	4854.43	MT-CO1	MT	5904	7445	+	1542	protein_coding	mitochondrially encoded cytochrome c oxidase I [Source:HGNC Symbol;Acc:HGNC:7419]	-
ENSG00000227097	3705.61	6573.15	4571.12	5917.48	4871.04	5352.29	RPS28P7	11	82689559	82689768	+	210	processed_pseudogene	ribosomal protein S28 pseudogene 7 [Source:HGNC Symbol;Acc:HGNC:35787]	-
ENSG00000198840	4131.9	8086.01	5706.2	5940.02	3051.72	4066.2	MT-ND3	MT	10059	10404	+	346	protein_coding	mitochondrially encoded NADH:ubiquinone oxidoreductase core subunit 3 [Source:HGNC Symbol;Acc:HGNC:7458]	-
ENSG00000184009	4172.46	4902.79	5176.36	5352.51	5080.68	5610.02	ACTG1	17	81509971	81523847	-	2920	protein_coding	actin gamma 1 [Source:HGNC Symbol;Acc:HGNC:144]	-
ENSG00000111640	3341.3	5372.95	4000.76	4718.67	5100.38	5435.94	GAPDH	12	6534512	6538374	+	2396	protein_coding	glyceraldehyde-3-phosphate dehydrogenase [Source:HGNC Symbol;Acc:HGNC:4141]	-
ENSG00000198938	4115.29	3163.89	5469.14	5877.83	3898.13	3865.19	MT-CO3	MT	9207	9990	+	784	protein_coding	mitochondrially encoded cytochrome c oxidase III [Source:HGNC Symbol;Acc:HGNC:7422]	-
ENSG00000210082	2724.42	3593.07	3608.61	4039.28	4766.24	3264.74	MT-RNR2	MT	1671	3229	+	1559	Mt_rRNA	mitochondrially encoded 16S rRNA [Source:HGNC Symbol;Acc:HGNC:7471]	-
ENSG00000125148	3004.37	5208.96	4234.81	2722.5	2737.11	2355.84	MT2A	16	56608584	56609497	+	914	protein_coding	metallothionein 2A [Source:HGNC Symbol;Acc:HGNC:7406]	-
ENSG00000237214	1593.35	5571.41	2308.72	2788.89	3606.92	3352.52	AL080243.2	22	41064052	41064633	+	582	processed_pseudogene	ribosomal protein S9 (RPS9) pseudogene	-
ENSG00000210196	1809.79	2920.17	2914.58	3520	3845.68	3517.67	MT-TP	MT	15956	16023	-	68	Mt_tRNA	mitochondrially encoded tRNA-Pro (CCN) [Source:HGNC Symbol;Acc:HGNC:7494]	-
ENSG00000137309	2069.42	2531.48	2340.07	3472.03	3092.15	3083.43	HMGA1	6	34236873	34246231	+	2327	protein_coding	high mobility group AT-hook 1 [Source:HGNC Symbol;Acc:HGNC:5010]	HMGA
ENSG00000161016	2275.49	3433.5	2280.68	3333.17	2032.95	2343.3	RPL8	8	144789765	144792587	-	2159	protein_coding	ribosomal protein L8 [Source:HGNC Symbol;Acc:HGNC:10368]	-
ENSG00000243829	1412.23	4086.2	1811.77	2763.59	2719.64	2650.23	AC011495.1	19	49719498	49720081	-	584	processed_pseudogene	ribosomal protein S9 (RPS9) pseudogene	-
ENSG00000034510	2877.22	3621.71	2413.98	3101.62	1396.43	1834.3	TMSB10	2	84905656	84906671	+	461	protein_coding	thymosin beta 10 [Source:HGNC Symbol;Acc:HGNC:11879]	-
ENSG00000198899	2185.8	1329.51	3216.55	2641.94	3090.55	2685.31	MT-ATP6	MT	8527	9207	+	681	protein_coding	mitochondrially encoded ATP synthase membrane subunit 6 [Source:HGNC Symbol;Acc:HGNC:7414]	-
ENSG00000167658	1939.88	2443.88	2086.54	2695.27	2786.55	2606.27	EEF2	19	3976056	3985463	-	4021	protein_coding	eukaryotic translation elongation factor 2 [Source:HGNC Symbol;Acc:HGNC:3214]	-
ENSG00000089157	1997.81	4741.5	2376.48	2246.31	1279.6	1814.17	RPLP0	12	120196699	120201235	-	3988	protein_coding	ribosomal protein lateral stalk subunit P0 [Source:HGNC Symbol;Acc:HGNC:10371]	-
ENSG00000112306	2270.68	4734.21	2871.96	1773.5	1226.85	1399.22	RPS12	6	132814569	132817564	+	639	protein_coding	ribosomal protein S12 [Source:HGNC Symbol;Acc:HGNC:10385]	-
ENSG00000100097	1879.52	4182.83	2188.52	2185.52	1559.55	1760.09	LGALS1	22	37675636	37679802	+	1067	protein_coding	galectin 1 [Source:HGNC Symbol;Acc:HGNC:6561]	-
ENSG00000136942	1212.03	3634.01	1651.48	2090.38	2128.01	2790.68	RPL35	9	124857880	124861981	-	1535	protein_coding	ribosomal protein L35 [Source:HGNC Symbol;Acc:HGNC:10344]	-
ENSG00000142541	1901.39	4286.09	2352.98	1781.75	1024.96	1336	RPL13A	19	49487554	49492308	+	2369	protein_coding	ribosomal protein L13a [Source:HGNC Symbol;Acc:HGNC:10304]	-
ENSG00000197956	2076.83	3958.52	2248.32	1934.24	1058.09	1237.79	S100A6	1	153534599	153536244	-	971	protein_coding	S100 calcium binding protein A6 [Source:HGNC Symbol;Acc:HGNC:10496]	-
ENSG00000083845	1190.58	3313.17	1541.46	1804.55	1748.33	1945.49	RPS5	19	58386400	58394806	+	3617	protein_coding	ribosomal protein S5 [Source:HGNC Symbol;Acc:HGNC:10426]	-
ENSG00000168028	1618.87	4100.6	1994.05	1658.77	782.796	1313.31	RPSA	3	39406716	39412542	+	3909	protein_coding	ribosomal protein SA [Source:HGNC Symbol;Acc:HGNC:6502]	-
ENSG00000171345	1367.48	2577.08	1640.23	1762.02	1888.13	1901.14	KRT19	17	41523617	41528308	-	2336	protein_coding	keratin 19 [Source:HGNC Symbol;Acc:HGNC:6436]	-
ENSG00000075624	1417.19	1430.73	1643.48	1566.16	1851.35	2295.72	ACTB	7	5527148	5563784	-	3413	protein_coding	actin beta [Source:HGNC Symbol;Acc:HGNC:132]	-
ENSG00000198888	1552.47	1151.42	2182.86	1788.54	1543.29	1707.94	MT-ND1	MT	3307	4262	+	956	protein_coding	mitochondrially encoded NADH:ubiquinone oxidoreductase core subunit 1 [Source:HGNC Symbol;Acc:HGNC:7455]	-
ENSG00000189343	1017.04	2521.82	1212.01	2024.86	1612.89	1478.35	RPS2P46	17	19445970	19446852	-	883	processed_pseudogene	ribosomal protein S2 pseudogene 46 [Source:HGNC Symbol;Acc:HGNC:35839]	-
ENSG00000212907	1164.48	949.249	1775.45	1816.27	2127.68	1846.7	MT-ND4L	MT	10470	10766	+	297	protein_coding	mitochondrially encoded NADH:ubiquinone oxidoreductase core subunit 4L [Source:HGNC Symbol;Acc:HGNC:7460]	-
ENSG00000198886	1256.18	804.765	1784.75	1855.4	2077.2	1873.2	MT-ND4	MT	10760	12137	+	1378	protein_coding	mitochondrially encoded NADH:ubiquinone oxidoreductase core subunit 4 [Source:HGNC Symbol;Acc:HGNC:7459]	-
ENSG00000115268	973.689	2454.11	1277.35	1281.58	1210.61	1454.91	RPS15	19	1438358	1440494	+	2137	protein_coding	ribosomal protein S15 [Source:HGNC Symbol;Acc:HGNC:10388]	-
ENSG00000198727	1356.48	991.635	1974.74	1545.34	1312.77	1385.46	MT-CYB	MT	14747	15887	+	1141	protein_coding	mitochondrially encoded cytochrome b [Source:HGNC Symbol;Acc:HGNC:7427]	-
ENSG00000074800	1066.52	1614.24	1212.14	1390.53	1490.4	1731.84	ENO1	1	8861000	8879190	-	5216	protein_coding	enolase 1 [Source:HGNC Symbol;Acc:HGNC:3350]	-
ENSG00000137818	1078.64	2417.43	1379.32	1260.58	1000.35	1247.66	RPLP1	15	69452814	69456205	+	3252	protein_coding	ribosomal protein lateral stalk subunit P1 [Source:HGNC Symbol;Acc:HGNC:10372]	-
ENSG00000177954	921.55	2810.54	1365.29	1128.86	1077.76	1079.8	RPS27	1	153990762	153992155	+	1028	protein_coding	ribosomal protein S27 [Source:HGNC Symbol;Acc:HGNC:10416]	-
ENSG00000106153	1187.05	2590.64	1399.18	1318.06	691.248	1117.77	CHCHD2	7	56101573	56106476	-	1028	protein_coding	coiled-coil-helix-coiled-coil-helix domain containing 2 [Source:HGNC Symbol;Acc:HGNC:21645]	-
ENSG00000227063	700.487	981.702	1233.39	3663.15	554.579	1164.29	RPL41P1	20	21755270	21755350	+	81	processed_pseudogene	ribosomal protein L41 pseudogene 1 [Source:HGNC Symbol;Acc:HGNC:10356]	-
ENSG00000105640	914.375	2183.49	1117.77	1407.28	1237.22	1304.62	RPL18A	19	17859910	17864153	+	3493	protein_coding	ribosomal protein L18a [Source:HGNC Symbol;Acc:HGNC:10311]	-
ENSG00000162244	950.928	2742.96	1350.29	1034.76	687.502	931.784	RPL29	3	51993522	51995895	-	2011	protein_coding	ribosomal protein L29 [Source:HGNC Symbol;Acc:HGNC:10331]	-
ENSG00000213442	740.247	2025.27	1107.29	1228.61	1242.07	1239.67	RPL18AP3	12	104265309	104265836	+	528	processed_pseudogene	ribosomal protein L18a pseudogene 3 [Source:HGNC Symbol;Acc:HGNC:31387]	-
ENSG00000084207	772.307	1598.25	973.598	1387.77	1280.56	1368.41	GSTP1	11	67583595	67586656	+	1911	protein_coding	glutathione S-transferase pi 1 [Source:HGNC Symbol;Acc:HGNC:4638]	-
ENSG00000235174	742.479	2090.98	954.729	1020.75	1232.7	1103.97	RPL39P3	6	73373108	73373263	-	156	processed_pseudogene	ribosomal protein L39 pseudogene 3 [Source:HGNC Symbol;Acc:HGNC:21383]	-
ENSG00000229117	1211.71	2229.69	1121.41	839.325	855.591	798.348	RPL41	12	56116590	56117967	+	1108	protein_coding	ribosomal protein L41 [Source:HGNC Symbol;Acc:HGNC:10354]	-
ENSG00000142534	1118.38	2307.72	1142.19	1209.41	530.88	723.474	RPS11	19	49496365	49499708	+	1409	protein_coding	ribosomal protein S11 [Source:HGNC Symbol;Acc:HGNC:10384]	-
ENSG00000177600	813.888	1347.68	1077.82	1325.69	1089.04	1269.22	RPLP2	11	809965	812880	+	1637	protein_coding	ribosomal protein lateral stalk subunit P2 [Source:HGNC Symbol;Acc:HGNC:10377]	-
ENSG00000142089	1016.51	1440.72	1298.71	840.119	900.074	949.377	IFITM3	11	319676	327537	-	1151	protein_coding	interferon induced transmembrane protein 3 [Source:HGNC Symbol;Acc:HGNC:5414]	-
ENSG00000170421	824.193	1420.5	926.367	1050.58	923.011	1076.97	KRT8	12	52897187	52949954	-	6881	protein_coding	keratin 8 [Source:HGNC Symbol;Acc:HGNC:6446]	-
ENSG00000233276	463.14	1170.6	606.002	1144.51	1386.62	1355.87	GPX1	3	49357176	49358358	-	1183	polymorphic_pseudogene	glutathione peroxidase 1 [Source:HGNC Symbol;Acc:HGNC:4553]	-
ENSG00000111669	686.671	1166.27	803.309	1130.54	1064.34	1221.08	TPI1	12	6867119	6870948	+	2700	protein_coding	triosephosphate isomerase 1 [Source:HGNC Symbol;Acc:HGNC:12009]	-
ENSG00000149806	648.892	1466.79	874.18	1024.02	970.623	1053.78	FAU	11	65120630	65122177	-	1548	protein_coding	FAU ubiquitin like and ribosomal protein S30 fusion [Source:HGNC Symbol;Acc:HGNC:3597]	-
ENSG00000108518	785.928	1140.07	864.252	988.007	1054.42	1066.35	PFN1	17	4945652	4949061	-	1987	protein_coding	profilin 1 [Source:HGNC Symbol;Acc:HGNC:8881]	-
ENSG00000167526	806.61	1531.04	899.429	1068.21	746.981	800.241	RPL13	16	89560657	89566828	+	6172	protein_coding	ribosomal protein L13 [Source:HGNC Symbol;Acc:HGNC:10303]	-
ENSG00000183971	475.64	662.322	595.077	1098.23	1442.64	1387.63	NPW	16	2009926	2020755	+	928	protein_coding	neuropeptide W [Source:HGNC Symbol;Acc:HGNC:30509]	-
ENSG00000145425	678.78	1548.69	907.791	865.016	631.478	931.034	RPS3A	4	151099624	151104642	+	2280	protein_coding	ribosomal protein S3A [Source:HGNC Symbol;Acc:HGNC:10421]	-
ENSG00000105372	742.552	1722.92	965.739	788.074	596.167	680.345	RPS19	19	41860255	41872925	+	3461	protein_coding	ribosomal protein S19 [Source:HGNC Symbol;Acc:HGNC:10402]	-
ENSG00000244398	468.715	1443.22	710.627	840.03	918.262	973.052	AC116533.1	11	16974693	16975013	-	321	processed_pseudogene	ribosomal protein L36a (RPL36A) pseudogene	-
ENSG00000188229	743.841	1153.71	821.854	693.926	697.448	1224.16	TUBB4B	9	137241287	137243707	+	2037	protein_coding	tubulin beta 4B class IVb [Source:HGNC Symbol;Acc:HGNC:20771]	-
ENSG00000105193	723.03	1357.64	819.394	896.671	692.477	781.746	RPS16	19	39433137	39435949	-	2674	protein_coding	ribosomal protein S16 [Source:HGNC Symbol;Acc:HGNC:10396]	-
ENSG00000179218	1178.73	1567.06	1102.37	526.47	377.71	502.304	CALR	19	12938578	12944489	+	2714	protein_coding	calreticulin [Source:HGNC Symbol;Acc:HGNC:1455]	-
ENSG00000198695	643.234	543.973	1072.17	885.88	1113.29	960.891	MT-ND6	MT	14149	14673	-	525	protein_coding	mitochondrially encoded NADH:ubiquinone oxidoreductase core subunit 6 [Source:HGNC Symbol;Acc:HGNC:7462]	-
ENSG00000179091	493.436	870.224	604.433	975.727	1106.97	1105.44	CYC1	8	144095039	144097525	+	1963	protein_coding	cytochrome c1 [Source:HGNC Symbol;Acc:HGNC:2579]	-
ENSG00000099795	397.28	977.198	494.943	969.999	1217.75	1083.58	NDUFB7	19	14566078	14572066	-	535	protein_coding	NADH:ubiquinone oxidoreductase subunit B7 [Source:HGNC Symbol;Acc:HGNC:7702]	-
ENSG00000198763	742.556	430.983	994.615	855.233	946.812	883.746	MT-ND2	MT	4470	5511	+	1042	protein_coding	mitochondrially encoded NADH:ubiquinone oxidoreductase core subunit 2 [Source:HGNC Symbol;Acc:HGNC:7456]	-
ENSG00000242299	921.29	1404.99	861.337	837.239	261.467	516.557	AC073861.1	3	101576489	101576947	-	459	processed_pseudogene	ribosomal protein S18 (RPS18) pseudogene	-
novel.233	674.499	804.68	887.604	611.677	779.558	970.673	-	6	144898122	144929991	+	1458	-	- && Q1W209.2 RecName: Full=Embryonic stem cell-related gene protein; Short=hES cell-related gene protein && PF00098:Zinc knuckle	zf-CCHC
ENSG00000096384	861.006	622.982	771.666	656.934	746.01	1013.12	HSP90AB1	6	44246166	44253888	+	2980	protein_coding	heat shock protein 90 alpha family class B member 1 [Source:HGNC Symbol;Acc:HGNC:5258]	-
ENSG00000110955	697.259	1204.06	765.877	699.904	555.223	710.073	ATP5F1B	12	56638175	56645984	-	2238	protein_coding	ATP synthase F1 subunit beta [Source:HGNC Symbol;Acc:HGNC:830]	-
ENSG00000108298	729.284	1524.73	747.447	728.85	368.842	472.431	RPL19	17	39200283	39204732	+	1761	protein_coding	ribosomal protein L19 [Source:HGNC Symbol;Acc:HGNC:10312]	-
ENSG00000100316	746.944	1384.25	836.88	666.458	441.076	493.385	RPL3	22	39312882	39320389	-	4710	protein_coding	ribosomal protein L3 [Source:HGNC Symbol;Acc:HGNC:10332]	-
ENSG00000169976	488.377	1262.24	605.045	660.217	692.886	798.436	SF3B5	6	144094884	144095573	-	690	protein_coding	splicing factor 3b subunit 5 [Source:HGNC Symbol;Acc:HGNC:21083]	-
ENSG00000211459	610.682	692.074	649.289	1127.58	720.706	698.446	MT-RNR1	MT	648	1601	+	954	Mt_rRNA	mitochondrially encoded 12S rRNA [Source:HGNC Symbol;Acc:HGNC:7470]	-
ENSG00000166165	441.664	630.749	539.21	889.377	982.584	993.817	CKB	14	103519667	103522833	-	2383	protein_coding	creatine kinase B [Source:HGNC Symbol;Acc:HGNC:1991]	-
ENSG00000167900	505.376	769.205	645.601	808.547	860.487	884.261	TK1	17	78174091	78187233	-	1845	protein_coding	thymidine kinase 1 [Source:HGNC Symbol;Acc:HGNC:11830]	-
ENSG00000197958	700.805	1442.59	787.337	698.683	370.391	455.208	RPL12	9	127447674	127451406	-	2453	protein_coding	ribosomal protein L12 [Source:HGNC Symbol;Acc:HGNC:10302]	-
ENSG00000147403	589.217	1423.01	674.066	560.975	429.052	534.135	RPL10	X	154389955	154409168	+	4825	protein_coding	ribosomal protein L10 [Source:HGNC Symbol;Acc:HGNC:10298]	-
ENSG00000126432	447.955	1018.44	518.952	793.588	694.753	689.407	PRDX5	11	64318121	64321811	+	860	protein_coding	peroxiredoxin 5 [Source:HGNC Symbol;Acc:HGNC:9355]	-
ENSG00000198786	577.89	350.333	801.464	796.623	867.4	743.609	MT-ND5	MT	12337	14148	+	1812	protein_coding	mitochondrially encoded NADH:ubiquinone oxidoreductase core subunit 5 [Source:HGNC Symbol;Acc:HGNC:7461]	-
ENSG00000106211	551.123	677.852	527.048	719.934	741.91	897.669	HSPB1	7	76302673	76304295	+	1505	protein_coding	heat shock protein family B (small) member 1 [Source:HGNC Symbol;Acc:HGNC:5246]	-
ENSG00000175602	424.898	784.027	617.648	742.95	765.335	707.489	CCDC85B	11	65890673	65891635	+	963	protein_coding	coiled-coil domain containing 85B [Source:HGNC Symbol;Acc:HGNC:24926]	-
ENSG00000171858	619.632	1503.91	736.054	562.372	227.843	344.779	RPS21	20	62387103	62388520	+	1036	protein_coding	ribosomal protein S21 [Source:HGNC Symbol;Acc:HGNC:10409]	-
ENSG00000149273	580.871	1252.2	696.136	629.812	327.805	462.663	RPS3	11	75399515	75422280	+	5859	protein_coding	ribosomal protein S3 [Source:HGNC Symbol;Acc:HGNC:10420]	-
ENSG00000126709	830.636	1616.38	1281.07	32.8624	23.578	33.4514	IFI6	1	27666064	27672198	-	842	protein_coding	interferon alpha inducible protein 6 [Source:HGNC Symbol;Acc:HGNC:4054]	-
ENSG00000131469	553.192	1290.63	689.413	540.599	291.118	445.601	RPL27	17	42998273	43002959	+	2026	protein_coding	ribosomal protein L27 [Source:HGNC Symbol;Acc:HGNC:10328]	-
ENSG00000125968	273.83	494.578	367.327	973.147	877.876	820.493	ID1	20	31605283	31606515	+	1233	protein_coding	inhibitor of DNA binding 1, HLH protein [Source:HGNC Symbol;Acc:HGNC:5360]	bHLH
ENSG00000178952	411.837	760.222	447.164	708.147	739.707	739.722	TUFM	16	28842411	28846348	-	2211	protein_coding	Tu translation elongation factor, mitochondrial [Source:HGNC Symbol;Acc:HGNC:12420]	-
ENSG00000244313	390.914	1305.71	557.401	536.205	440.54	546.591	AC024293.1	11	46428653	46429150	-	498	processed_pseudogene	ribosomal protein S10 (RPS10) pseudogene	-
ENSG00000147604	424.833	897.712	568.339	725.334	540.081	589.376	RPL7	8	73290242	73295789	-	2700	protein_coding	ribosomal protein L7 [Source:HGNC Symbol;Acc:HGNC:10363]	-
ENSG00000156508	838.026	874.653	824.344	443.034	406.193	303.657	EEF1A1	6	73515750	73523797	-	5474	protein_coding	eukaryotic translation elongation factor 1 alpha 1 [Source:HGNC Symbol;Acc:HGNC:3189]	-
ENSG00000063177	521.438	970.85	601.867	609.251	431.753	509.347	RPL18	19	48615328	48619184	-	3857	protein_coding	ribosomal protein L18 [Source:HGNC Symbol;Acc:HGNC:10310]	-
ENSG00000111057	528.5	675.754	637.641	638.539	542.409	618.53	KRT18	12	52948871	52952906	+	3069	protein_coding	keratin 18 [Source:HGNC Symbol;Acc:HGNC:6430]	-
ENSG00000215030	411.2	1009.49	585.216	538.552	499.615	594.34	RPL13P12	17	17383377	17384012	-	636	processed_pseudogene	ribosomal protein L13 pseudogene 12 [Source:HGNC Symbol;Acc:HGNC:35701]	-
ENSG00000167468	377.352	826.505	506.145	596.395	582.226	665.183	GPX4	19	1103926	1106791	+	2019	protein_coding	glutathione peroxidase 4 [Source:HGNC Symbol;Acc:HGNC:4556]	-
ENSG00000067225	457.065	666.786	502.139	588.648	564.586	652.296	PKM	15	72199029	72231822	-	8571	protein_coding	pyruvate kinase M1/2 [Source:HGNC Symbol;Acc:HGNC:9021]	-
ENSG00000196154	384.964	972.645	565.026	538.491	467.441	488.677	S100A4	1	153543613	153550136	-	946	protein_coding	S100 calcium binding protein A4 [Source:HGNC Symbol;Acc:HGNC:10494]	-
ENSG00000182154	263.785	790.33	407.607	524.822	604.365	756.509	MRPL41	9	137551879	137552555	+	582	protein_coding	mitochondrial ribosomal protein L41 [Source:HGNC Symbol;Acc:HGNC:14492]	-
ENSG00000108106	350.787	772.218	429.444	556.624	585.135	651.561	UBE2S	19	55399745	55407788	-	2799	protein_coding	ubiquitin conjugating enzyme E2 S [Source:HGNC Symbol;Acc:HGNC:17895]	-
ENSG00000163191	529.38	737.067	651.764	439.286	491.249	480.846	S100A11	1	152032506	152047907	-	649	protein_coding	S100 calcium binding protein A11 [Source:HGNC Symbol;Acc:HGNC:10488]	-
ENSG00000185624	674.782	967.046	673.564	349.489	282.239	343.293	P4HB	17	81843161	81860624	-	5231	protein_coding	prolyl 4-hydroxylase subunit beta [Source:HGNC Symbol;Acc:HGNC:8548]	-
ENSG00000173457	371.285	647.488	384.193	653.418	552.997	667.096	PPP1R14B	11	64244479	64246943	-	1658	protein_coding	protein phosphatase 1 regulatory inhibitor subunit 14B [Source:HGNC Symbol;Acc:HGNC:9057]	-
ENSG00000197728	364.368	662.626	543.561	528.026	490.634	580.143	RPS26	12	56041351	56044697	+	2053	protein_coding	ribosomal protein S26 [Source:HGNC Symbol;Acc:HGNC:10414]	-
ENSG00000214485	281.301	823.76	464.501	459.155	522.898	546.638	RPL7P1	5	150094302	150095048	+	747	processed_pseudogene	ribosomal protein L7 pseudogene 1 [Source:HGNC Symbol;Acc:HGNC:10367]	-
ENSG00000168653	304.191	605.176	414.786	551.623	538.808	655.516	NDUFS5	1	39026318	39034636	+	548	protein_coding	NADH:ubiquinone oxidoreductase subunit S5 [Source:HGNC Symbol;Acc:HGNC:7712]	-
ENSG00000125835	379.467	785.473	469.15	463.923	453.958	500.104	SNRPB	20	2461634	2470853	-	1278	protein_coding	small nuclear ribonucleoprotein polypeptides B and B1 [Source:HGNC Symbol;Acc:HGNC:11153]	-
ENSG00000169100	401.217	637.419	421.34	585.633	479.452	506.832	SLC25A6	X	1386152	1392113	-	1553	protein_coding	solute carrier family 25 member 6 [Source:HGNC Symbol;Acc:HGNC:10992]	-
ENSG00000130726	343.961	361.231	366.712	527.942	633.654	778.362	TRIM28	19	58544064	58550722	+	4306	protein_coding	tripartite motif containing 28 [Source:HGNC Symbol;Acc:HGNC:16384]	-
ENSG00000167996	516.307	456.471	529.926	609.874	392.26	476.644	FTH1	11	61959718	61967634	-	2004	protein_coding	ferritin heavy chain 1 [Source:HGNC Symbol;Acc:HGNC:3976]	-
ENSG00000159335	373.743	454.534	379.309	616.813	546.522	595.853	PTMS	12	6765516	6770952	+	1515	protein_coding	parathymosin [Source:HGNC Symbol;Acc:HGNC:9629]	-
ENSG00000243449	298.069	498.453	345.376	566.263	649.086	608.527	C4orf48	4	2041993	2043970	+	540	protein_coding	chromosome 4 open reading frame 48 [Source:HGNC Symbol;Acc:HGNC:34437]	-
ENSG00000125534	314.012	307.486	316.393	690.931	673.026	662.789	PPDPF	20	63520765	63522206	+	1053	protein_coding	pancreatic progenitor cell differentiation and proliferation factor [Source:HGNC Symbol;Acc:HGNC:16142]	-
ENSG00000144713	398.647	934.267	516.354	466.29	249.375	389.432	RPL32	3	12834485	12841582	-	3714	protein_coding	ribosomal protein L32 [Source:HGNC Symbol;Acc:HGNC:10336]	-
ENSG00000142669	352.891	501.242	418.841	487.527	610.106	560.92	SH3BGRL3	1	26280086	26281522	+	876	protein_coding	SH3 domain binding glutamate rich protein like 3 [Source:HGNC Symbol;Acc:HGNC:15568]	-
ENSG00000236552	443.737	945.099	548.466	433.91	233.488	311.972	RPL13AP5	10	96750288	96750899	+	612	processed_pseudogene	ribosomal protein L13a pseudogene 5 [Source:HGNC Symbol;Acc:HGNC:23736]	-
ENSG00000175793	452.386	579.005	490.819	462.422	425.196	506.31	SFN	1	26863149	26864456	+	1308	protein_coding	stratifin [Source:HGNC Symbol;Acc:HGNC:10773]	-
ENSG00000008988	386.701	879.851	499.459	466.03	251.842	391.939	RPS20	8	56067295	56074581	-	3002	protein_coding	ribosomal protein S20 [Source:HGNC Symbol;Acc:HGNC:10405]	-
ENSG00000196656	401.129	539.058	405.503	536.071	398.085	582.608	AC004057.1	4	113214046	113217170	-	498	transcribed_processed_pseudogene	ribosomal protein S26 (RPS26) pseudogene	-
ENSG00000004059	304.933	710.346	371.272	490.364	458.175	473.908	ARF5	7	127588386	127591700	+	1825	protein_coding	ADP ribosylation factor 5 [Source:HGNC Symbol;Acc:HGNC:658]	-
ENSG00000143947	339.799	767.484	459.774	440.556	381.925	415.98	RPS27A	2	55231903	55235853	+	3130	protein_coding	ribosomal protein S27a [Source:HGNC Symbol;Acc:HGNC:10417]	-
ENSG00000099624	241.384	358.689	291.013	554.515	674.693	666.661	ATP5F1D	19	1241746	1244825	+	2249	protein_coding	ATP synthase F1 subunit delta [Source:HGNC Symbol;Acc:HGNC:837]	-
ENSG00000103363	301.401	661.984	384.25	463.813	447.505	510.393	ELOB	16	2771414	2777297	-	1128	protein_coding	elongin B [Source:HGNC Symbol;Acc:HGNC:11619]	-
ENSG00000143320	336.758	469.406	407.176	599.541	444.036	499.261	CRABP2	1	156699606	156705816	-	1082	protein_coding	cellular retinoic acid binding protein 2 [Source:HGNC Symbol;Acc:HGNC:2339]	-
ENSG00000188486	350.657	419.576	378.953	447.154	473.666	684.023	H2AFX	11	119093854	119095467	-	1614	protein_coding	H2A histone family member X [Source:HGNC Symbol;Acc:HGNC:4739]	-
ENSG00000169715	402.156	683.509	589.783	406.028	326.198	343.731	MT1E	16	56625475	56627112	+	1052	protein_coding	metallothionein 1E [Source:HGNC Symbol;Acc:HGNC:7397]	-
ENSG00000108107	350.97	461.019	433.275	512.95	450.274	511.121	RPL28	19	55385345	55403250	+	6933	protein_coding	ribosomal protein L28 [Source:HGNC Symbol;Acc:HGNC:10330]	-
ENSG00000215021	353.014	754.23	386.77	424.05	339.791	455.004	PHB2	12	6965327	6970753	-	2427	protein_coding	prohibitin 2 [Source:HGNC Symbol;Acc:HGNC:30306]	-
ENSG00000100300	244.957	559.699	322.176	454.207	540.421	550.665	TSPO	22	43151547	43163242	+	1422	protein_coding	translocator protein [Source:HGNC Symbol;Acc:HGNC:1158]	-
ENSG00000169738	228.939	552.192	308.45	432.773	575.525	556.865	DCXR	17	82035136	82037709	-	1879	protein_coding	dicarbonyl and L-xylulose reductase [Source:HGNC Symbol;Acc:HGNC:18985]	-
ENSG00000188290	441.883	589.436	546.943	326.972	331.119	365.742	HES4	1	998962	1000172	-	1118	protein_coding	hes family bHLH transcription factor 4 [Source:HGNC Symbol;Acc:HGNC:24149]	bHLH
ENSG00000227081	295.654	828.759	399.854	395.852	363.757	304.714	AC005912.1	12	3211663	3211917	-	255	processed_pseudogene	ribosomal protein S27 (RPS27) pseudogene	-
ENSG00000130255	372.497	624.051	368.505	557.453	296.704	364.393	RPL36	19	5674947	5691875	+	2271	protein_coding	ribosomal protein L36 [Source:HGNC Symbol;Acc:HGNC:13631]	-
ENSG00000230202	446.618	940.656	414.093	321.634	181.731	271.391	AL450405.1	6	117998975	117999448	+	474	processed_pseudogene	ribosomal protein L29 (RPL29) pseudogene	-
ENSG00000170315	428.306	663.675	473.355	405.535	287.67	312.185	UBB	17	16380798	16382745	+	1567	protein_coding	ubiquitin B [Source:HGNC Symbol;Acc:HGNC:12463]	-
novel.726	122.897	1417.85	828.308	132.877	21.7088	45.2032	-	CHR_HSCHR6_MHC_COX_CTG1	33194147	33198115	+	744	-	- && P62271.3 RecName: Full=40S ribosomal protein S18 >P62269.3 RecName: Full=40S ribosomal protein S18; AltName: Full=Ke-3; Short=Ke3 >P62272.3 RecName: Full=40S ribosomal protein S18 >P62270.3 RecName: Full=40S ribosomal protein S18; AltName: Full=Ke-3; Short=Ke3 >Q5TJE9.3 RecName: Full=40S ribosomal protein S18 >Q3T0R1.3 RecName: Full=40S ribosomal protein S18 >A5JST6.1 RecName: Full=40S ribos…	-
ENSG00000105701	245.648	377.117	295.8	496.378	601.116	520.877	FKBP8	19	18531751	18544077	-	2819	protein_coding	FKBP prolyl isomerase 8 [Source:HGNC Symbol;Acc:HGNC:3724]	-
ENSG00000136810	297.806	587.254	415.459	368.386	424.883	434.611	TXN	9	110243810	110256507	-	1010	protein_coding	thioredoxin [Source:HGNC Symbol;Acc:HGNC:12435]	-
ENSG00000128228	388.535	755.259	389.71	293.439	284.854	389.492	SDF2L1	22	21642302	21644299	+	1059	protein_coding	stromal cell derived factor 2 like 1 [Source:HGNC Symbol;Acc:HGNC:10676]	-
ENSG00000123989	284.987	337.679	308.995	482.402	503.965	583.065	CHPF	2	219538948	219543809	-	3375	protein_coding	chondroitin polymerizing factor [Source:HGNC Symbol;Acc:HGNC:24291]	-
ENSG00000067560	406.11	417.146	459.06	385.918	365.784	440.08	RHOA	3	49359145	49412998	-	2498	protein_coding	ras homolog family member A [Source:HGNC Symbol;Acc:HGNC:667]	-
ENSG00000178464	344.289	896.607	404.835	306.96	244.322	273.742	RPL10P16	19	12643275	12643919	-	645	processed_pseudogene	ribosomal protein L10 pseudogene 16 [Source:HGNC Symbol;Acc:HGNC:36882]	-
ENSG00000230897	473.717	668.467	413.051	434.715	154.559	300.104	RPS18P12	17	14705076	14705534	-	459	processed_pseudogene	ribosomal protein S18 pseudogene 12 [Source:HGNC Symbol;Acc:HGNC:35967]	-
ENSG00000174748	330.207	845.003	396.933	386.699	169.757	304.853	RPL15	3	23916545	23924374	+	7222	protein_coding	ribosomal protein L15 [Source:HGNC Symbol;Acc:HGNC:10306]	-
ENSG00000172270	297.439	426.461	336.492	422.738	451.381	452.534	BSG	19	571277	583493	+	3797	protein_coding	basigin (Ok blood group) [Source:HGNC Symbol;Acc:HGNC:1116]	-
ENSG00000163682	250.638	679.365	322.1	385.886	296.676	448.293	RPL9	4	39452521	39458949	-	5022	protein_coding	ribosomal protein L9 [Source:HGNC Symbol;Acc:HGNC:10369]	-
ENSG00000169750	221.466	346.016	240.802	508.514	522.51	515.76	RAC3	17	82031678	82034204	+	1473	protein_coding	Rac family small GTPase 3 [Source:HGNC Symbol;Acc:HGNC:9803]	-
ENSG00000198755	369.899	529.378	442.2	416.992	297.326	299.123	RPL10A	6	35468401	35470785	+	1508	protein_coding	ribosomal protein L10a [Source:HGNC Symbol;Acc:HGNC:10299]	-
ENSG00000101210	273.57	351.315	332.497	450.05	497.994	430.905	EEF1A2	20	63488014	63499185	-	4771	protein_coding	eukaryotic translation elongation factor 1 alpha 2 [Source:HGNC Symbol;Acc:HGNC:3192]	-
ENSG00000006327	341.158	674.123	447.165	318.14	292.453	261.265	TNFRSF12A	16	3018445	3022383	+	1848	protein_coding	TNF receptor superfamily member 12A [Source:HGNC Symbol;Acc:HGNC:18152]	-
ENSG00000175315	298.327	650.498	371.912	364.732	297.931	329.258	CST6	11	66012008	66013505	+	592	protein_coding	cystatin E/M [Source:HGNC Symbol;Acc:HGNC:2478]	-
ENSG00000283041	359.74	558.974	340.544	412.981	287.405	344.833	AC008038.1	7	133034607	133035920	-	1314	processed_pseudogene	eukaryotic translation elongation factor 1 gamma (	-
ENSG00000183010	253.934	467.287	298.077	421.091	467.886	388.756	PYCR1	17	81932384	81942412	-	2886	protein_coding	pyrroline-5-carboxylate reductase 1 [Source:HGNC Symbol;Acc:HGNC:9721]	-
ENSG00000103257	336.384	349.733	363.631	482.29	422.268	342.706	SLC7A5	16	87830023	87869507	-	4764	protein_coding	solute carrier family 7 member 5 [Source:HGNC Symbol;Acc:HGNC:11063]	-
ENSG00000092820	550.396	503.407	491.009	244.796	223.712	280.217	EZR	6	158765741	158819368	-	3298	protein_coding	ezrin [Source:HGNC Symbol;Acc:HGNC:12691]	-
ENSG00000104904	297.143	614.512	356.248	339.223	292.581	362.498	OAZ1	19	2269509	2273490	+	3436	protein_coding	ornithine decarboxylase antizyme 1 [Source:HGNC Symbol;Acc:HGNC:8095]	-
ENSG00000010256	254.846	478.957	330.993	392.608	400.181	396.269	UQCRC1	3	48599002	48610976	-	3204	protein_coding	ubiquinol-cytochrome c reductase core protein 1 [Source:HGNC Symbol;Acc:HGNC:12585]	-
ENSG00000101444	259.85	484.25	324.107	405.895	388.247	373.05	AHCY	20	34280268	34311802	-	3894	protein_coding	adenosylhomocysteinase [Source:HGNC Symbol;Acc:HGNC:343]	-
ENSG00000204628	294.878	355.879	335.945	449.04	347.39	406.12	RACK1	5	181236897	181248096	-	5740	protein_coding	receptor for activated C kinase 1 [Source:HGNC Symbol;Acc:HGNC:4399]	-
ENSG00000150991	342.134	758.725	399.759	203.118	205.304	266.437	UBC	12	124911604	124917368	-	3898	protein_coding	ubiquitin C [Source:HGNC Symbol;Acc:HGNC:12468]	-
ENSG00000172354	241.441	356.286	270.186	408.826	442.774	445.74	GNB2	7	100673567	100679174	+	2692	protein_coding	G protein subunit beta 2 [Source:HGNC Symbol;Acc:HGNC:4398]	-
ENSG00000176340	279.09	418.587	272.921	472.435	366.457	354.438	COX8A	11	63974620	63976543	+	494	protein_coding	cytochrome c oxidase subunit 8A [Source:HGNC Symbol;Acc:HGNC:2294]	-
ENSG00000142937	341.942	614.45	406.16	361.812	186.493	233.55	RPS8	1	44775251	44778779	+	2781	protein_coding	ribosomal protein S8 [Source:HGNC Symbol;Acc:HGNC:10441]	-
novel.845	285.103	294.312	214.201	913.98	189.429	246.317	-	KI270733.1	134628	135752	-	1125	-	- && - && -	-
ENSG00000213553	310.092	632.11	329.808	412.537	155.428	260.797	RPLP0P6	2	38481851	38482804	+	954	processed_pseudogene	ribosomal protein lateral stalk subunit P0 pseudogene 6 [Source:HGNC Symbol;Acc:HGNC:36404]	-
ENSG00000164587	283.842	583.187	315.548	333.596	283.661	289.897	RPS14	5	150442635	150449739	-	5082	protein_coding	ribosomal protein S14 [Source:HGNC Symbol;Acc:HGNC:10387]	-
ENSG00000179271	181.865	453.19	248.923	362.948	426.806	413.538	GADD45GIP1	19	12953119	12957223	-	1769	protein_coding	GADD45G interacting protein 1 [Source:HGNC Symbol;Acc:HGNC:29996]	-
ENSG00000102007	284.996	426.502	369.71	289.62	341.436	346.83	PLP2	X	49171898	49175235	+	1303	protein_coding	proteolipid protein 2 [Source:HGNC Symbol;Acc:HGNC:9087]	-
ENSG00000187514	412.312	358.277	383.822	318.784	261.994	322.531	PTMA	2	231706895	231713541	+	3378	protein_coding	prothymosin alpha [Source:HGNC Symbol;Acc:HGNC:9623]	-
ENSG00000123416	270.615	412.068	293.724	305.098	313.577	422.585	TUBA1B	12	49127782	49131397	-	3574	protein_coding	tubulin alpha 1b [Source:HGNC Symbol;Acc:HGNC:18809]	-
ENSG00000163584	178.959	571.72	291.508	275.126	350.131	337.48	RPL22L1	3	170864875	170870208	-	2051	protein_coding	ribosomal protein L22 like 1 [Source:HGNC Symbol;Acc:HGNC:27610]	-
ENSG00000183684	290.452	434.22	278.728	353.961	262.373	382.502	ALYREF	17	81887835	81891586	-	1583	protein_coding	Aly/REF export factor [Source:HGNC Symbol;Acc:HGNC:19071]	-
ENSG00000244038	358.47	603.728	368.241	258.128	191.451	213.697	DDOST	1	20651767	20661544	-	2721	protein_coding	dolichyl-diphosphooligosaccharide--protein glycosyltransferase non-catalytic subunit [Source:HGNC Symbol;Acc:HGNC:2728]	-
ENSG00000119333	174.34	318.083	224.689	365.256	469.41	435.323	WDR34	9	128633661	128656787	-	2604	protein_coding	WD repeat domain 34 [Source:HGNC Symbol;Acc:HGNC:28296]	-
ENSG00000197756	254.775	640.584	342.603	322.024	176.251	238.164	RPL37A	2	216498825	216579180	+	6205	protein_coding	ribosomal protein L37a [Source:HGNC Symbol;Acc:HGNC:10348]	-
ENSG00000198931	218.458	336.361	245.385	423.53	367.743	381.807	APRT	16	88809339	88811937	-	1796	protein_coding	adenine phosphoribosyltransferase [Source:HGNC Symbol;Acc:HGNC:626]	-
ENSG00000128185	124.691	363.571	185.016	331.859	510.94	439.082	DGCR6L	22	20314238	20320080	-	1192	protein_coding	DiGeorge syndrome critical region gene 6 like [Source:HGNC Symbol;Acc:HGNC:18551]	-
ENSG00000178035	289.987	535.281	324.752	320.084	219.45	260.779	IMPDH2	3	49024325	49029408	-	2773	protein_coding	inosine monophosphate dehydrogenase 2 [Source:HGNC Symbol;Acc:HGNC:6053]	-
ENSG00000169710	265.559	256.008	247.292	295.9	361.203	523.318	FASN	17	82078338	82098294	-	9321	protein_coding	fatty acid synthase [Source:HGNC Symbol;Acc:HGNC:3594]	-
ENSG00000197746	330.547	432.263	355.671	315.248	235.808	279.601	PSAP	10	71816298	71851325	-	3189	protein_coding	prosaposin [Source:HGNC Symbol;Acc:HGNC:9498]	-
ENSG00000187840	222.037	368.848	248.441	413.801	365.547	318.238	EIF4EBP1	8	38030534	38060365	+	880	protein_coding	eukaryotic translation initiation factor 4E binding protein 1 [Source:HGNC Symbol;Acc:HGNC:3288]	-
ENSG00000283498	444.248	352.783	367.566	246.519	252.695	248.937	MIR1244-2	5	118974586	118974670	+	85	miRNA	microRNA 1244-2 [Source:HGNC Symbol;Acc:HGNC:38321]	-
ENSG00000126457	235.905	522.057	273.36	299.884	258.422	310.866	PRMT1	19	49675786	49689029	+	4796	protein_coding	protein arginine methyltransferase 1 [Source:HGNC Symbol;Acc:HGNC:5187]	-
ENSG00000122026	203.657	384.403	278.232	346.822	345.164	341.82	RPL21	13	27251309	27256691	+	2249	protein_coding	ribosomal protein L21 [Source:HGNC Symbol;Acc:HGNC:10313]	-
ENSG00000188643	291.889	561.969	353.693	263.746	196.927	207.106	S100A16	1	153606886	153613145	-	1701	protein_coding	S100 calcium binding protein A16 [Source:HGNC Symbol;Acc:HGNC:20441]	-
ENSG00000124762	229.246	379.045	280.266	342.915	336.633	300.521	CDKN1A	6	36676460	36687339	+	3050	protein_coding	cyclin dependent kinase inhibitor 1A [Source:HGNC Symbol;Acc:HGNC:1784]	-
ENSG00000128524	209.347	467.427	241.764	330.162	282.245	310.327	ATP6V1F	7	128862856	128865847	+	762	protein_coding	ATPase H+ transporting V1 subunit F [Source:HGNC Symbol;Acc:HGNC:16832]	-
ENSG00000173915	152.175	382.771	228.575	267.697	396.088	400.144	ATP5MD	10	103389041	103396492	-	924	protein_coding	ATP synthase membrane subunit DAPIT [Source:HGNC Symbol;Acc:HGNC:30889]	-
ENSG00000075618	216.74	234.828	230.238	331.79	360.38	445.203	FSCN1	7	5592816	5606655	+	3699	protein_coding	fascin actin-bundling protein 1 [Source:HGNC Symbol;Acc:HGNC:11148]	-
ENSG00000174444	323.519	541.504	354.368	223.346	170.653	195.767	RPL4	15	66498015	66524532	-	5609	protein_coding	ribosomal protein L4 [Source:HGNC Symbol;Acc:HGNC:10353]	-
ENSG00000197747	338.784	305.746	354.127	291.936	235.297	279.429	S100A10	1	151982915	151993859	-	1012	protein_coding	S100 calcium binding protein A10 [Source:HGNC Symbol;Acc:HGNC:10487]	-
ENSG00000196262	254.779	403.498	280.733	351.578	251.947	260.641	PPIA	7	44796680	44824564	+	4432	protein_coding	peptidylprolyl isomerase A [Source:HGNC Symbol;Acc:HGNC:9253]	-
ENSG00000165283	258.921	534.09	304.066	291.215	164.579	244.296	STOML2	9	35099776	35103195	-	1806	protein_coding	stomatin like 2 [Source:HGNC Symbol;Acc:HGNC:14559]	-
ENSG00000114391	254.544	571.949	318.482	271.054	151.77	216.805	RPL24	3	101681091	101686718	-	2618	protein_coding	ribosomal protein L24 [Source:HGNC Symbol;Acc:HGNC:10325]	-
ENSG00000100804	226.641	423.24	255.706	315.685	243.875	278.722	PSMB5	14	23016543	23035230	-	1549	protein_coding	proteasome subunit beta 5 [Source:HGNC Symbol;Acc:HGNC:9542]	-
ENSG00000042753	183.291	296.176	205.613	333.438	351.198	366.731	AP2S1	19	46838136	46850992	-	1704	protein_coding	adaptor related protein complex 2 subunit sigma 1 [Source:HGNC Symbol;Acc:HGNC:565]	-
ENSG00000156482	190.828	542.211	276.979	269.232	171.45	275.638	RPL30	8	98024851	98046469	-	3987	protein_coding	ribosomal protein L30 [Source:HGNC Symbol;Acc:HGNC:10333]	-
ENSG00000167815	188.824	288.798	239.695	351.223	322.37	334.651	PRDX2	19	12796820	12801800	-	2034	protein_coding	peroxiredoxin 2 [Source:HGNC Symbol;Acc:HGNC:9353]	-
ENSG00000182899	214.573	557.116	289.184	281.361	145.242	228.636	RPL35A	3	197950190	197956610	+	2899	protein_coding	ribosomal protein L35a [Source:HGNC Symbol;Acc:HGNC:10345]	-
ENSG00000109475	148.715	499.833	232.954	237.249	284.273	303.388	RPL34	4	108620566	108630412	+	3393	protein_coding	ribosomal protein L34 [Source:HGNC Symbol;Acc:HGNC:10340]	-
ENSG00000013306	163.692	267.129	193.665	329.441	389.18	362.347	SLC25A39	17	44319625	44324870	-	3526	protein_coding	solute carrier family 25 member 39 [Source:HGNC Symbol;Acc:HGNC:24279]	-
ENSG00000117450	275.007	312.182	324.846	270.741	278.541	242.059	PRDX1	1	45511036	45523047	-	1504	protein_coding	peroxiredoxin 1 [Source:HGNC Symbol;Acc:HGNC:9352]	-
ENSG00000044574	548.854	333.721	386.296	128.155	148.934	150.851	HSPA5	9	125234853	125241343	-	3921	protein_coding	heat shock protein family A (Hsp70) member 5 [Source:HGNC Symbol;Acc:HGNC:5238]	-
ENSG00000212802	222.907	609.047	267.038	278.689	108.332	206.663	RPL15P3	6	12514110	12514724	+	615	processed_pseudogene	ribosomal protein L15 pseudogene 3 [Source:HGNC Symbol;Acc:HGNC:21538]	-
ENSG00000159377	270.692	464.623	303.393	276.385	156.895	220.515	PSMB4	1	151399560	151401937	+	2125	protein_coding	proteasome subunit beta 4 [Source:HGNC Symbol;Acc:HGNC:9541]	-
ENSG00000167513	168.456	195.241	200.11	356.365	404.861	366.749	CDT1	16	88803789	88809258	+	2760	protein_coding	chromatin licensing and DNA replication factor 1 [Source:HGNC Symbol;Acc:HGNC:24576]	-
ENSG00000130522	280.717	319.508	305.104	283.404	271.771	230.317	JUND	19	18279694	18281622	-	1929	protein_coding	JunD proto-oncogene, AP-1 transcription factor subunit [Source:HGNC Symbol;Acc:HGNC:6206]	TF_bZIP
ENSG00000128272	288.006	483.538	309.96	254.804	190.662	153.786	ATF4	22	39519695	39522685	+	2514	protein_coding	activating transcription factor 4 [Source:HGNC Symbol;Acc:HGNC:786]	TF_bZIP
ENSG00000172531	197.474	305.509	222.287	303.983	307.568	331.507	PPP1CA	11	67398183	67421183	-	2651	protein_coding	protein phosphatase 1 catalytic subunit alpha [Source:HGNC Symbol;Acc:HGNC:9281]	-
ENSG00000125743	232.643	519.323	299.127	265.927	143.76	198.212	SNRPD2	19	45687454	45692569	-	1608	protein_coding	small nuclear ribonucleoprotein D2 polypeptide [Source:HGNC Symbol;Acc:HGNC:11159]	-
ENSG00000130513	172.091	248.536	201.272	458.153	370.318	202.54	GDF15	19	18374731	18389176	+	2087	protein_coding	growth differentiation factor 15 [Source:HGNC Symbol;Acc:HGNC:30142]	-
ENSG00000198355	227.431	336.803	261.343	268.978	256.702	296.23	PIM3	22	49960768	49964072	+	2198	protein_coding	Pim-3 proto-oncogene, serine/threonine kinase [Source:HGNC Symbol;Acc:HGNC:19310]	-
ENSG00000137154	301.753	306.302	351.178	293.429	194.12	189.976	RPS6	9	19375715	19380236	-	2696	protein_coding	ribosomal protein S6 [Source:HGNC Symbol;Acc:HGNC:10429]	-
ENSG00000176101	164.215	325.327	207.219	297.917	286.301	355.355	SSNA1	9	137188660	137190370	+	1170	protein_coding	SS nuclear autoantigen 1 [Source:HGNC Symbol;Acc:HGNC:11321]	-
ENSG00000242372	195.134	298.051	224.686	318.343	274.732	322.015	EIF6	20	35278911	35284985	-	1631	protein_coding	eukaryotic translation initiation factor 6 [Source:HGNC Symbol;Acc:HGNC:6159]	-
ENSG00000130706	186.306	334.9	243.843	248.137	268.833	326.021	ADRM1	20	62302093	62308862	+	2142	protein_coding	adhesion regulating molecule 1 [Source:HGNC Symbol;Acc:HGNC:15759]	-
ENSG00000169230	188.529	466.454	221.219	249.881	214.845	259.926	PRELID1	5	177303799	177306949	+	1840	protein_coding	PRELI domain containing 1 [Source:HGNC Symbol;Acc:HGNC:30255]	-
ENSG00000196924	237.544	242.114	262.411	288.096	250.688	312.853	FLNA	X	154348524	154374638	-	10585	protein_coding	filamin A [Source:HGNC Symbol;Acc:HGNC:3754]	-
ENSG00000117399	240.839	262.325	235.703	254.389	230.094	367.493	CDC20	1	43358981	43363203	+	2012	protein_coding	cell division cycle 20 [Source:HGNC Symbol;Acc:HGNC:1723]	-
ENSG00000175756	163.377	305.114	185.17	328.962	287.428	317.58	AURKAIP1	1	1373730	1375495	-	1669	protein_coding	aurora kinase A interacting protein 1 [Source:HGNC Symbol;Acc:HGNC:24114]	-
ENSG00000198918	161.573	398.628	212.663	243.552	300.988	268.242	RPL39	X	119786504	119791630	-	2128	protein_coding	ribosomal protein L39 [Source:HGNC Symbol;Acc:HGNC:10350]	-
ENSG00000005022	269.721	334.599	288.569	255.469	188.007	242.276	SLC25A5	X	119468422	119471396	+	1555	protein_coding	solute carrier family 25 member 5 [Source:HGNC Symbol;Acc:HGNC:10991]	-
ENSG00000229119	218.424	539.407	255.926	236.997	125.089	200.219	AC026403.1	5	166382305	166382599	+	295	processed_pseudogene	60S acidic ribosomal protein (RPLP0) pseudogene	-
ENSG00000264281	216.556	470.256	274.261	207.509	189.094	215.584	AC016596.3	5	55944656	55944733	+	78	processed_pseudogene	ribosomal protein L41 (RPL41) pseudogene	-
ENSG00000182117	237.562	449.772	260.348	239.547	139.798	238.398	NOP10	15	34341713	34343177	-	554	protein_coding	NOP10 ribonucleoprotein [Source:HGNC Symbol;Acc:HGNC:14378]	-
ENSG00000123143	178.096	229.566	218.912	312.342	332.931	287.759	PKN1	19	14433053	14471867	+	4606	protein_coding	protein kinase N1 [Source:HGNC Symbol;Acc:HGNC:9405]	-
ENSG00000130748	155.627	296.486	173.85	312.63	294.533	299.621	TMEM160	19	47045909	47048624	-	655	protein_coding	transmembrane protein 160 [Source:HGNC Symbol;Acc:HGNC:26042]	-
ENSG00000102265	182.303	251.011	234.825	263.162	298.052	298.818	TIMP1	X	47582408	47586789	+	1446	protein_coding	TIMP metallopeptidase inhibitor 1 [Source:HGNC Symbol;Acc:HGNC:11820]	-
ENSG00000221983	199.955	324.671	225.252	308.851	226.03	243.372	UBA52	19	18571730	18577550	+	4306	protein_coding	ubiquitin A-52 residue ribosomal protein fusion product 1 [Source:HGNC Symbol;Acc:HGNC:12458]	-
ENSG00000166794	270.427	521.557	310.902	139.979	119.851	149.846	PPIB	15	64155812	64163205	-	1911	protein_coding	peptidylprolyl isomerase B [Source:HGNC Symbol;Acc:HGNC:9255]	-
ENSG00000126247	196.621	300.47	213.307	242.71	266.367	283.944	CAPNS1	19	36139953	36150353	+	3100	protein_coding	calpain small subunit 1 [Source:HGNC Symbol;Acc:HGNC:1481]	-
ENSG00000110492	174.835	281.514	211.066	306.168	260.741	265.966	MDK	11	46380756	46383837	+	2196	protein_coding	midkine [Source:HGNC Symbol;Acc:HGNC:6972]	-
ENSG00000196419	225.446	243.607	236.503	262.555	231.488	296.732	XRCC6	22	41621119	41664048	+	3288	protein_coding	X-ray repair cross complementing 6 [Source:HGNC Symbol;Acc:HGNC:4055]	-
ENSG00000107833	180.122	273.988	205.488	282.393	252.365	300.419	NPM3	10	101781325	101783413	-	928	protein_coding	nucleophosmin/nucleoplasmin 3 [Source:HGNC Symbol;Acc:HGNC:7931]	-
ENSG00000171314	228.57	317.7	205.287	218.351	230.087	291.294	PGAM1	10	97426191	97433444	+	2540	protein_coding	phosphoglycerate mutase 1 [Source:HGNC Symbol;Acc:HGNC:8888]	-
ENSG00000105655	137.765	220.451	170.247	301.711	354.575	301.235	ISYNA1	19	18434388	18438167	-	3150	protein_coding	inositol-3-phosphate synthase 1 [Source:HGNC Symbol;Acc:HGNC:29821]	-
ENSG00000175334	187.632	322.084	212.825	259.933	226.873	274.874	BANF1	11	66002228	66004149	+	1496	protein_coding	barrier to autointegration factor 1 [Source:HGNC Symbol;Acc:HGNC:17397]	-
ENSG00000160789	246.987	284.257	268.142	231.778	208.066	238.121	LMNA	1	156082573	156140089	+	6985	protein_coding	lamin A/C [Source:HGNC Symbol;Acc:HGNC:6636]	-
ENSG00000225178	200.501	514.067	247.859	219.406	109.762	175.32	RPSAP58	19	23827162	23828049	+	888	processed_pseudogene	ribosomal protein SA pseudogene 58 [Source:HGNC Symbol;Acc:HGNC:36809]	-
ENSG00000141522	186.965	176.815	182.441	302.725	261.796	349.691	ARHGDIA	17	81867721	81871378	-	2875	protein_coding	Rho GDP dissociation inhibitor alpha [Source:HGNC Symbol;Acc:HGNC:678]	-
ENSG00000084623	235.654	361.484	261.494	236.6	154.101	199.797	EIF3I	1	32221928	32231604	+	1725	protein_coding	eukaryotic translation initiation factor 3 subunit I [Source:HGNC Symbol;Acc:HGNC:3272]	-
ENSG00000125691	164.243	400.011	230.387	241.516	163.124	240.641	RPL23	17	38847860	38853764	-	5905	protein_coding	ribosomal protein L23 [Source:HGNC Symbol;Acc:HGNC:10316]	-
ENSG00000142507	171	376.842	211.547	238.984	217.581	220.605	PSMB6	17	4796144	4798502	+	1447	protein_coding	proteasome subunit beta 6 [Source:HGNC Symbol;Acc:HGNC:9543]	-
ENSG00000090013	213.444	404.787	272.085	217.387	153.501	175.314	BLVRB	19	40447765	40465764	-	1613	protein_coding	biliverdin reductase B [Source:HGNC Symbol;Acc:HGNC:1063]	-
ENSG00000179632	147.881	267.885	172.901	285.829	289.555	259.342	MAF1	8	144104461	144107611	+	2415	protein_coding	MAF1 homolog, negative regulator of RNA polymerase III [Source:HGNC Symbol;Acc:HGNC:24966]	-
ENSG00000051523	143.808	234.87	166.28	303.306	280.164	268.564	CYBA	16	88643289	88651054	-	3253	protein_coding	cytochrome b-245 alpha chain [Source:HGNC Symbol;Acc:HGNC:2577]	-
ENSG00000116649	126.751	150.737	160.689	212.19	337.493	407.701	SRM	1	11054584	11060020	-	1894	protein_coding	spermidine synthase [Source:HGNC Symbol;Acc:HGNC:11296]	-
ENSG00000218175	139.131	467.44	216.065	198.756	181.41	191.714	AC016739.1	2	176200908	176201252	-	345	processed_pseudogene	ribosomal protein, large, P1 (RPLP1) pseudogene	-
ENSG00000233927	174.94	320.72	204.789	264.775	209.795	219.089	RPS28	19	8321158	8323340	+	2119	protein_coding	ribosomal protein S28 [Source:HGNC Symbol;Acc:HGNC:10418]	-
ENSG00000198356	143.384	340.884	160.732	248.396	240.551	253.879	GET3	19	12737139	12748323	+	1652	protein_coding	guided entry of tail-anchored proteins factor 3, ATPase [Source:HGNC Symbol;Acc:HGNC:752]	-
ENSG00000143761	230.757	285.472	246.217	205.944	186.823	229.756	ARF1	1	228082660	228099212	+	3281	protein_coding	ADP ribosylation factor 1 [Source:HGNC Symbol;Acc:HGNC:652]	-
ENSG00000103260	111.996	165.79	136.046	292.164	341.245	319.556	METRN	16	715118	719655	+	3689	protein_coding	meteorin, glial cell differentiation regulator [Source:HGNC Symbol;Acc:HGNC:14151]	-
ENSG00000123975	191.207	395.375	272.452	183.492	105.607	210.309	CKS2	9	89311195	89316703	+	616	protein_coding	CDC28 protein kinase regulatory subunit 2 [Source:HGNC Symbol;Acc:HGNC:2000]	-
ENSG00000163931	168.988	333.145	190.723	239.706	216.179	209.45	TKT	3	53224712	53256052	-	9502	protein_coding	transketolase [Source:HGNC Symbol;Acc:HGNC:11834]	-
ENSG00000101057	127.757	170.872	147.715	268.255	302.001	331.143	MYBL2	20	43667019	43716495	+	2776	protein_coding	MYB proto-oncogene like 2 [Source:HGNC Symbol;Acc:HGNC:7548]	MYB
ENSG00000008018	218.049	481.42	287.195	161.651	80.7476	113.607	PSMB1	6	170535120	170553307	-	2219	protein_coding	proteasome subunit beta 1 [Source:HGNC Symbol;Acc:HGNC:9537]	-
ENSG00000181019	207.266	409.851	249.267	196.848	130.057	145.837	NQO1	16	69706996	69726668	-	2971	protein_coding	NAD(P)H quinone dehydrogenase 1 [Source:HGNC Symbol;Acc:HGNC:2874]	-
ENSG00000135624	209.837	360.263	211.696	205.372	158.389	193.318	CCT7	2	73233420	73253021	+	3591	protein_coding	chaperonin containing TCP1 subunit 7 [Source:HGNC Symbol;Acc:HGNC:1622]	-
ENSG00000163468	244.381	390.195	251.627	174.489	116.865	161.291	CCT3	1	156308968	156367873	-	3864	protein_coding	chaperonin containing TCP1 subunit 3 [Source:HGNC Symbol;Acc:HGNC:1616]	-
ENSG00000155660	387.688	322.02	326.24	103.694	88.0156	108.433	PDIA4	7	149003062	149028662	-	3298	protein_coding	protein disulfide isomerase family A member 4 [Source:HGNC Symbol;Acc:HGNC:30167]	-
ENSG00000261236	127.753	167.478	167.831	236.697	310.176	322.507	BOP1	8	144262045	144291438	-	3841	protein_coding	BOP1 ribosomal biogenesis factor [Source:HGNC Symbol;Acc:HGNC:15519]	-
ENSG00000105438	170.107	211.899	206.78	226.353	263.861	253.439	KDELR1	19	48382575	48391551	-	2244	protein_coding	KDEL endoplasmic reticulum protein retention receptor 1 [Source:HGNC Symbol;Acc:HGNC:6304]	-
ENSG00000158710	161.484	265.297	201.297	244.041	227.323	232.451	TAGLN2	1	159918107	159925732	-	2487	protein_coding	transgelin 2 [Source:HGNC Symbol;Acc:HGNC:11554]	-
ENSG00000148334	117.785	172.441	142.679	261.736	310.315	321.982	PTGES2	9	128120693	128128462	-	2655	protein_coding	prostaglandin E synthase 2 [Source:HGNC Symbol;Acc:HGNC:17822]	-
ENSG00000172757	167.731	195.914	168.372	294.579	234.077	265.052	CFL1	11	65823022	65862026	-	5865	protein_coding	cofilin 1 [Source:HGNC Symbol;Acc:HGNC:1874]	-
ENSG00000108679	202.629	216.751	251.818	221.697	204.937	216.501	LGALS3BP	17	78971238	78979947	-	3422	protein_coding	galectin 3 binding protein [Source:HGNC Symbol;Acc:HGNC:6564]	-
ENSG00000167553	198.625	281.015	230.937	167.807	172.373	260.864	TUBA1C	12	49188736	49274603	+	4631	protein_coding	tubulin alpha 1c [Source:HGNC Symbol;Acc:HGNC:20768]	-
ENSG00000166441	201.174	439.707	215.373	222.765	93.995	136.008	RPL27A	11	8682788	8714759	+	6816	protein_coding	ribosomal protein L27a [Source:HGNC Symbol;Acc:HGNC:10329]	-
ENSG00000183207	153.893	255.125	168.449	250.953	223.371	249.047	RUVBL2	19	48993562	49015970	+	3531	protein_coding	RuvB like AAA ATPase 2 [Source:HGNC Symbol;Acc:HGNC:10475]	-
ENSG00000232573	267.963	354.24	215.847	249.431	93.8662	116.444	RPL3P4	14	98972879	98973301	-	423	processed_pseudogene	ribosomal protein L3 pseudogene 4 [Source:HGNC Symbol;Acc:HGNC:19805]	-
ENSG00000007080	168.129	230.663	164.685	283.845	210.447	239.765	CCDC124	19	17933015	17943991	+	1661	protein_coding	coiled-coil domain containing 124 [Source:HGNC Symbol;Acc:HGNC:25171]	-
ENSG00000126458	163.636	365.324	212.868	192.645	162.136	180.885	RRAS	19	49635292	49640143	-	1102	protein_coding	RAS related [Source:HGNC Symbol;Acc:HGNC:10447]	-
ENSG00000105355	216.321	297.746	213.857	190.57	152.273	202.342	PLIN3	19	4838341	4867694	-	2739	protein_coding	perilipin 3 [Source:HGNC Symbol;Acc:HGNC:16893]	-
ENSG00000167775	121.707	207.705	145.833	241.501	293.989	261.322	CD320	19	8302127	8308358	-	2279	protein_coding	CD320 molecule [Source:HGNC Symbol;Acc:HGNC:16692]	-
ENSG00000122406	225.724	336.287	283.485	191.5	106.519	124.585	RPL5	1	92832013	92841924	+	3687	protein_coding	ribosomal protein L5 [Source:HGNC Symbol;Acc:HGNC:10360]	-
ENSG00000169223	203.204	355.953	212.775	192.498	141.781	156.418	LMAN2	5	177331567	177351668	-	2168	protein_coding	lectin, mannose binding 2 [Source:HGNC Symbol;Acc:HGNC:16986]	-
ENSG00000175592	275.214	260.69	319.687	150.515	121.554	124.275	FOSL1	11	65892049	65900573	-	1887	protein_coding	FOS like 1, AP-1 transcription factor subunit [Source:HGNC Symbol;Acc:HGNC:13718]	TF_bZIP
ENSG00000224631	145.53	387.099	184.302	176.089	179.043	179.247	RPS27AP16	16	61055399	61055964	-	566	transcribed_processed_pseudogene	ribosomal protein S27a pseudogene 16 [Source:HGNC Symbol;Acc:HGNC:36855]	-
ENSG00000128283	127.919	151.331	153.22	276.654	276.475	246	CDC42EP1	22	37560480	37569405	+	2540	protein_coding	CDC42 effector protein 1 [Source:HGNC Symbol;Acc:HGNC:17014]	-
ENSG00000130005	100.744	202	125.612	252.069	288.947	257.692	GAMT	19	1397026	1401570	-	2403	protein_coding	guanidinoacetate N-methyltransferase [Source:HGNC Symbol;Acc:HGNC:4136]	-
ENSG00000131165	141.362	187.792	166.908	200.021	238.672	289.746	CHMP1A	16	89644435	89657721	-	3080	protein_coding	charged multivesicular body protein 1A [Source:HGNC Symbol;Acc:HGNC:8740]	-
ENSG00000130520	163.68	325.25	181.489	223.41	154.135	172.213	LSM4	19	18306230	18323274	-	3029	protein_coding	LSM4 homolog, U6 small nuclear RNA and mRNA degradation associated [Source:HGNC Symbol;Acc:HGNC:17259]	-
ENSG00000074842	212.288	416.816	215.458	152.892	97.6238	122.593	MYDGF	19	4641374	4670370	-	1678	protein_coding	myeloid derived growth factor [Source:HGNC Symbol;Acc:HGNC:16948]	-
ENSG00000146701	154.778	185.452	168.287	231.935	225.942	247.989	MDH2	7	76048051	76067508	+	3641	protein_coding	malate dehydrogenase 2 [Source:HGNC Symbol;Acc:HGNC:6971]	-
ENSG00000140990	165.678	206.037	153.671	259.601	177.464	242.735	NDUFB10	16	1959538	1961975	+	1040	protein_coding	NADH:ubiquinone oxidoreductase subunit B10 [Source:HGNC Symbol;Acc:HGNC:7696]	-
ENSG00000072506	146.462	315.521	174.915	205.035	169.601	189.332	HSD17B10	X	53431258	53434373	-	1115	protein_coding	hydroxysteroid 17-beta dehydrogenase 10 [Source:HGNC Symbol;Acc:HGNC:4800]	-
ENSG00000135940	144.178	334.152	181.996	212.699	151.486	163.633	COX5B	2	97646062	97648383	+	1419	protein_coding	cytochrome c oxidase subunit 5B [Source:HGNC Symbol;Acc:HGNC:2269]	-
ENSG00000198242	185.164	179.771	192.544	305.141	155.429	161.35	RPL23A	17	28719985	28724359	+	2232	protein_coding	ribosomal protein L23a [Source:HGNC Symbol;Acc:HGNC:10317]	-
novel.29	223.399	213.539	272.802	141.867	166.591	158.528	-	1	68385500	68391980	-	6417	-	- && Q1W209.2 RecName: Full=Embryonic stem cell-related gene protein; Short=hES cell-related gene protein && PF00098:Zinc knuckle	zf-CCHC
ENSG00000129562	182.541	308.783	244.98	122.142	152.841	162.871	DAD1	14	22564907	22589224	-	761	protein_coding	defender against cell death 1 [Source:HGNC Symbol;Acc:HGNC:2664]	-
ENSG00000167797	196.59	238.209	212.566	154.712	183.298	188.61	CDK2AP2	11	67506497	67508649	-	2019	protein_coding	cyclin dependent kinase 2 associated protein 2 [Source:HGNC Symbol;Acc:HGNC:30833]	-
ENSG00000169689	137.422	287.906	155.573	200.736	157.84	228.455	CENPX	17	82018702	82024107	-	1531	protein_coding	centromere protein X [Source:HGNC Symbol;Acc:HGNC:11422]	-
ENSG00000105699	166.981	173.564	182.825	242.386	197.284	202.89	LSR	19	35248330	35267964	+	2916	protein_coding	lipolysis stimulated lipoprotein receptor [Source:HGNC Symbol;Acc:HGNC:29572]	-
ENSG00000180992	133.707	321.545	190.581	163.094	156.582	199.433	MRPL14	6	44113451	44127452	-	957	protein_coding	mitochondrial ribosomal protein L14 [Source:HGNC Symbol;Acc:HGNC:14279]	-
ENSG00000108561	222.802	268.845	213.424	177.695	109.088	171.066	C1QBP	17	5432777	5448830	-	2335	protein_coding	complement C1q binding protein [Source:HGNC Symbol;Acc:HGNC:1243]	-
ENSG00000164062	124.113	219.675	156.463	224.718	225.63	209.482	APEH	3	49674014	49683971	+	4425	protein_coding	acylaminoacyl-peptide hydrolase [Source:HGNC Symbol;Acc:HGNC:586]	-
ENSG00000176978	105.416	181.969	136.714	225.129	279.511	228.785	DPP7	9	137110546	137115177	-	2823	protein_coding	dipeptidyl peptidase 7 [Source:HGNC Symbol;Acc:HGNC:14892]	-
ENSG00000071082	124.417	330.819	174.554	193.247	158.625	174.598	RPL31	2	101002229	101024032	+	5277	protein_coding	ribosomal protein L31 [Source:HGNC Symbol;Acc:HGNC:10334]	-
ENSG00000167747	114.992	186.824	147.975	247.025	236.45	217.016	C19orf48	19	50797704	50804929	-	3256	protein_coding	chromosome 19 open reading frame 48 [Source:HGNC Symbol;Acc:HGNC:29667]	-
novel.732	188.551	243.412	349.405	156.973	102.426	108.476	-	CHR_HSCHR6_MHC_COX_CTG1	31259790	31263197	-	1607	-	- && P10321.3 RecName: Full=HLA class I histocompatibility antigen, Cw-7 alpha chain; AltName: Full=MHC class I antigen Cw*7; Flags: Precursor && PF06623:MHC_I C-terminus	-
ENSG00000173113	149.66	271.636	161.865	215.492	154.818	190.275	TRMT112	11	64316460	64318084	-	1625	protein_coding	tRNA methyltransferase subunit 11-2 [Source:HGNC Symbol;Acc:HGNC:26940]	-
ENSG00000166508	151.535	215.28	159.731	184.316	185.39	237.591	MCM7	7	100092728	100101940	-	4386	protein_coding	minichromosome maintenance complex component 7 [Source:HGNC Symbol;Acc:HGNC:6950]	-
novel.669	104.252	156.279	121.651	269.936	209.037	269.153	-	CHR_HSCHR22_1_CTG7	23894271	23895229	+	675	-	- && P14174.4 RecName: Full=Macrophage migration inhibitory factor; Short=MIF; AltName: Full=Glycosylation-inhibiting factor; Short=GIF; AltName: Full=L-dopachrome isomerase; AltName: Full=L-dopachrome tautomerase; AltName: Full=Phenylpyruvate tautomerase >Q4R549.3 RecName: Full=Macrophage migration inhibitory factor; Short=MIF; AltName: Full=L-dopachrome isomerase; AltName: Full=L-dopachrome tau…	-
ENSG00000163382	107.662	225.215	138.089	206.728	228.096	223.062	NAXE	1	156591762	156594299	+	1933	protein_coding	NAD(P)HX epimerase [Source:HGNC Symbol;Acc:HGNC:18453]	-
ENSG00000175063	173.441	233.454	185.155	176.205	157.472	192.324	UBE2C	20	45812576	45816957	+	1286	protein_coding	ubiquitin conjugating enzyme E2 C [Source:HGNC Symbol;Acc:HGNC:15937]	-
ENSG00000136930	217.283	357.981	236.657	145.815	63.0755	94.7914	PSMB7	9	124353465	124415444	-	1788	protein_coding	proteasome subunit beta 7 [Source:HGNC Symbol;Acc:HGNC:9544]	-
ENSG00000130725	136.684	213.309	147.828	216.817	189.382	209.069	UBE2M	19	58555712	58558954	-	1743	protein_coding	ubiquitin conjugating enzyme E2 M [Source:HGNC Symbol;Acc:HGNC:12491]	-
ENSG00000142546	107.871	281.531	142.133	157.993	202.39	215.438	NOSIP	19	49555468	49590262	-	4477	protein_coding	nitric oxide synthase interacting protein [Source:HGNC Symbol;Acc:HGNC:17946]	-
ENSG00000137970	111.49	247.307	152.439	238.973	162.462	190.873	RPL7P9	1	96678874	96679620	-	747	processed_pseudogene	ribosomal protein L7 pseudogene 9 [Source:HGNC Symbol;Acc:HGNC:37028]	-
ENSG00000174903	113.88	169.795	143.37	199.002	238.014	236.82	RAB1B	11	66268590	66277492	+	1950	protein_coding	RAB1B, member RAS oncogene family [Source:HGNC Symbol;Acc:HGNC:18370]	-
ENSG00000117410	101.32	231.008	142.396	163.744	239.318	222.676	ATP6V0B	1	43974487	43978295	+	3239	protein_coding	ATPase H+ transporting V0 subunit b [Source:HGNC Symbol;Acc:HGNC:861]	-
ENSG00000100075	113.307	134.65	131.066	217.205	240.315	254.323	SLC25A1	22	19175581	19178739	-	1999	protein_coding	solute carrier family 25 member 1 [Source:HGNC Symbol;Acc:HGNC:10979]	-
ENSG00000126267	158.257	265.586	159.431	229.298	122.117	152.874	COX6B1	19	35648323	35658782	+	1369	protein_coding	cytochrome c oxidase subunit 6B1 [Source:HGNC Symbol;Acc:HGNC:2280]	-
ENSG00000184897	171.993	214.166	184.801	209.057	144.013	162.36	H1FX	3	129314771	129316286	-	1516	protein_coding	H1 histone family member X [Source:HGNC Symbol;Acc:HGNC:4722]	-
ENSG00000103024	86.927	196.34	108.006	198.972	261.854	233.518	NME3	16	1770286	1771730	-	1445	protein_coding	NME/NM23 nucleoside diphosphate kinase 3 [Source:HGNC Symbol;Acc:HGNC:7851]	-
ENSG00000104915	103.637	234.046	132.496	202.491	192.693	219.05	STX10	19	13144058	13150383	-	1796	protein_coding	syntaxin 10 [Source:HGNC Symbol;Acc:HGNC:11428]	-
ENSG00000110700	161.426	242.166	178.239	188.653	151.724	161.895	RPS13	11	17074388	17077715	-	2115	protein_coding	ribosomal protein S13 [Source:HGNC Symbol;Acc:HGNC:10386]	-
ENSG00000107874	127.456	251.225	154.57	189.257	178.577	180.017	CUEDC2	10	102423245	102432584	-	1335	protein_coding	CUE domain containing 2 [Source:HGNC Symbol;Acc:HGNC:28352]	-
ENSG00000177697	130.905	192.54	156.636	181.164	198.055	212.174	CD151	11	832887	839831	+	3894	protein_coding	CD151 molecule (Raph blood group) [Source:HGNC Symbol;Acc:HGNC:1630]	-
ENSG00000178719	120.842	136.709	152.637	197.1	221.841	238.066	GRINA	8	143990056	143993415	+	2529	protein_coding	glutamate ionotropic receptor NMDA type subunit associated protein 1 [Source:HGNC Symbol;Acc:HGNC:4589]	-
ENSG00000188986	111.615	172.694	140.717	181.624	215.471	241.559	NELFB	9	137255327	137273542	+	2540	protein_coding	negative elongation factor complex member B [Source:HGNC Symbol;Acc:HGNC:24324]	-
ENSG00000123144	149.538	285.028	156.783	178.992	137.957	154.613	TRIR	19	12730640	12734684	-	1311	protein_coding	telomerase RNA component interacting RNase [Source:HGNC Symbol;Acc:HGNC:28424]	-
ENSG00000214253	91.6545	243.47	112.753	190.307	212.613	206.518	FIS1	7	101239458	101252316	-	1791	protein_coding	fission, mitochondrial 1 [Source:HGNC Symbol;Acc:HGNC:21689]	-
ENSG00000168209	205.814	280.424	174.979	178.528	108.449	106.598	DDIT4	10	72273924	72276036	+	2054	protein_coding	DNA damage inducible transcript 4 [Source:HGNC Symbol;Acc:HGNC:24944]	-
ENSG00000089693	126.865	164.423	144.713	182.937	212.162	221.48	MLF2	12	6747996	6767475	-	3781	protein_coding	myeloid leukemia factor 2 [Source:HGNC Symbol;Acc:HGNC:7126]	-
ENSG00000135404	152.034	324.138	181.675	156.461	108.2	129.512	CD63	12	55725323	55729707	-	2633	protein_coding	CD63 molecule [Source:HGNC Symbol;Acc:HGNC:1692]	-
ENSG00000198034	164.647	209.103	193.995	181.563	160.377	138.073	RPS4X	X	72255679	72277248	-	2930	protein_coding	ribosomal protein S4 X-linked [Source:HGNC Symbol;Acc:HGNC:10424]	-
ENSG00000099341	146.168	294.87	164.475	145.374	124.263	165.674	PSMD8	19	38374536	38383824	+	3105	protein_coding	proteasome 26S subunit, non-ATPase 8 [Source:HGNC Symbol;Acc:HGNC:9566]	-
ENSG00000164405	116.028	311.233	155.743	159.514	118.888	178.195	UQCRQ	5	132866630	132868847	+	2218	protein_coding	ubiquinol-cytochrome c reductase complex III subunit VII [Source:HGNC Symbol;Acc:HGNC:29594]	-
ENSG00000175166	164.662	220.883	166.991	166.994	145.675	173.538	PSMD2	3	184299198	184309050	+	4960	protein_coding	proteasome 26S subunit, non-ATPase 2 [Source:HGNC Symbol;Acc:HGNC:9559]	-
ENSG00000169567	144.374	293.435	160.564	134.396	130.313	173.051	HINT1	5	131159027	131171735	-	1792	protein_coding	histidine triad nucleotide binding protein 1 [Source:HGNC Symbol;Acc:HGNC:4912]	-
ENSG00000135916	134.954	259.191	160.476	197.351	139.275	142.994	ITM2C	2	230864639	230879248	+	2569	protein_coding	integral membrane protein 2C [Source:HGNC Symbol;Acc:HGNC:6175]	-
ENSG00000102144	191.971	296.725	197.405	122.29	100.661	120.452	PGK1	X	77910739	78129295	+	5437	protein_coding	phosphoglycerate kinase 1 [Source:HGNC Symbol;Acc:HGNC:8896]	-
ENSG00000131143	144.37	292.975	160.513	177.496	115.829	137.226	COX4I1	16	85798633	85807054	+	4802	protein_coding	cytochrome c oxidase subunit 4I1 [Source:HGNC Symbol;Acc:HGNC:2265]	-
ENSG00000247596	123.952	253.157	145.958	171.416	173.656	152.31	TWF2	3	52228612	52239158	-	1720	protein_coding	twinfilin actin binding protein 2 [Source:HGNC Symbol;Acc:HGNC:9621]	-
ENSG00000197858	103.414	148.178	130.47	208.654	221.493	204.899	GPAA1	8	144082590	144086216	+	3268	protein_coding	glycosylphosphatidylinositol anchor attachment 1 [Source:HGNC Symbol;Acc:HGNC:4446]	-
ENSG00000108828	106.106	165.54	124.841	174.509	231.33	213.631	VAT1	17	43014607	43025123	-	3466	protein_coding	vesicle amine transport 1 [Source:HGNC Symbol;Acc:HGNC:16919]	-
ENSG00000101255	164.25	202.172	192.905	209.505	167.244	79.2913	TRIB3	20	362835	397559	+	3030	protein_coding	tribbles pseudokinase 3 [Source:HGNC Symbol;Acc:HGNC:16228]	-
ENSG00000143774	86.5568	235.741	117.886	156.125	214.841	201.639	GUK1	1	228139962	228148984	+	4725	protein_coding	guanylate kinase 1 [Source:HGNC Symbol;Acc:HGNC:4693]	-
ENSG00000189060	202.414	230.234	201.252	144.12	115.583	112.899	H1F0	22	37805093	37807436	+	2344	protein_coding	H1 histone family member 0 [Source:HGNC Symbol;Acc:HGNC:4714]	-
ENSG00000175416	116.522	218.54	150.812	169.499	165.19	181.399	CLTB	5	176392455	176416569	-	2039	protein_coding	clathrin light chain B [Source:HGNC Symbol;Acc:HGNC:2091]	-
ENSG00000117691	109.281	282.776	147.259	157.168	137.896	164.298	NENF	1	212432920	212446379	+	1264	protein_coding	neudesin neurotrophic factor [Source:HGNC Symbol;Acc:HGNC:30384]	-
ENSG00000147123	110.015	182.456	133.962	180.737	194.86	196.36	NDUFB11	X	47142216	47145504	-	1418	protein_coding	NADH:ubiquinone oxidoreductase subunit B11 [Source:HGNC Symbol;Acc:HGNC:20372]	-
ENSG00000171159	76.9357	132.816	99.1739	213.386	240.575	234.949	C9orf16	9	128160265	128163924	+	1653	protein_coding	chromosome 9 open reading frame 16 [Source:HGNC Symbol;Acc:HGNC:17823]	-
ENSG00000179967	150.367	138.782	122.247	266.982	136.863	179.65	PPP1R14BP3	4	139114930	139115374	-	445	processed_pseudogene	protein phosphatase 1 regulatory inhibitor subunit 14B pseudogene 3 [Source:HGNC Symbol;Acc:HGNC:16330]	-
ENSG00000101188	177.033	191.821	181.25	173.654	134.01	134.426	NTSR1	20	62708836	62762771	+	4238	protein_coding	neurotensin receptor 1 [Source:HGNC Symbol;Acc:HGNC:8039]	-
ENSG00000158716	87.1411	217.448	111.025	175.251	187.502	211.296	DUSP23	1	159780932	159782543	+	827	protein_coding	dual specificity phosphatase 23 [Source:HGNC Symbol;Acc:HGNC:21480]	-
ENSG00000173660	148.138	212.433	147.246	195.822	118.812	165.679	UQCRH	1	46303698	46316776	+	1341	protein_coding	ubiquinol-cytochrome c reductase hinge protein [Source:HGNC Symbol;Acc:HGNC:12590]	-
ENSG00000112695	125.04	330.98	163.435	138.829	93.838	132.62	COX7A2	6	75237675	75250323	-	1922	protein_coding	cytochrome c oxidase subunit 7A2 [Source:HGNC Symbol;Acc:HGNC:2288]	-
ENSG00000165916	155.193	296.048	180.715	116.026	105.189	130.402	PSMC3	11	47418769	47426473	-	2276	protein_coding	proteasome 26S subunit, ATPase 3 [Source:HGNC Symbol;Acc:HGNC:9549]	-
ENSG00000106628	101.577	154.386	118.636	186.105	206.779	214.291	POLD2	7	44114681	44124358	-	3695	protein_coding	DNA polymerase delta 2, accessory subunit [Source:HGNC Symbol;Acc:HGNC:9176]	-
ENSG00000089220	151.715	233.312	159.894	170.563	123.46	141.241	PEBP1	12	118136124	118145584	+	1514	protein_coding	phosphatidylethanolamine binding protein 1 [Source:HGNC Symbol;Acc:HGNC:8630]	-
ENSG00000159069	100.203	130.4	111.564	187.699	227.406	222.213	FBXW5	9	136940435	136944738	-	3294	protein_coding	F-box and WD repeat domain containing 5 [Source:HGNC Symbol;Acc:HGNC:13613]	-
ENSG00000065268	100.995	146.269	113.467	197.692	202.054	218.34	WDR18	19	984271	998438	+	2357	protein_coding	WD repeat domain 18 [Source:HGNC Symbol;Acc:HGNC:17956]	-
ENSG00000228305	111.987	313.451	142.53	127.646	120.737	160.378	AC016734.1	2	63622178	63622831	-	654	processed_pseudogene	PRELI domain containing 1 (PRELID1) pseudogene	-
ENSG00000182199	114.685	206.555	137.581	185.935	172.444	157.768	SHMT2	12	57229573	57234935	+	4592	protein_coding	serine hydroxymethyltransferase 2 [Source:HGNC Symbol;Acc:HGNC:10852]	-
ENSG00000189334	142.182	290.24	163.318	183.127	107.595	88.0613	S100A14	1	153614255	153616986	-	1277	protein_coding	S100 calcium binding protein A14 [Source:HGNC Symbol;Acc:HGNC:18901]	-
ENSG00000173801	126.78	132.442	137.476	190.501	184.709	198.413	JUP	17	41754604	41786931	-	4942	protein_coding	junction plakoglobin [Source:HGNC Symbol;Acc:HGNC:6207]	-
ENSG00000173156	115.709	243.914	148.271	154.848	154.675	149.736	RHOD	11	67056847	67072017	+	1240	protein_coding	ras homolog family member D [Source:HGNC Symbol;Acc:HGNC:670]	-
ENSG00000107223	162.884	238.597	154.546	184.004	101.974	123.674	EDF1	9	136862119	136866308	-	1222	protein_coding	endothelial differentiation related factor 1 [Source:HGNC Symbol;Acc:HGNC:3164]	-
ENSG00000133112	145.616	336.884	205.157	130.773	57.2229	86.8559	TPT1	13	45333471	45341370	-	7269	protein_coding	tumor protein, translationally-controlled 1 [Source:HGNC Symbol;Acc:HGNC:12022]	-
ENSG00000253570	123.793	225.428	151.247	183.821	132.102	145.19	RNF5P1	8	38600661	38601200	-	540	processed_pseudogene	ring finger protein 5 pseudogene 1 [Source:HGNC Symbol;Acc:HGNC:31053]	-
ENSG00000161179	103.441	131.172	114.461	185.4	200.632	225.175	YDJC	22	21628089	21630064	-	1754	protein_coding	YdjC chitooligosaccharide deacetylase homolog [Source:HGNC Symbol;Acc:HGNC:27158]	-
ENSG00000136830	124.658	151.797	133.285	171.109	182.005	197.402	NIBAN2	9	127505339	127578989	-	4617	protein_coding	niban apoptosis regulator 2 [Source:HGNC Symbol;Acc:HGNC:25282]	-
ENSG00000053371	97.6985	168.87	116.977	189.264	196.016	188.322	AKR7A2	1	19303965	19312146	-	1781	protein_coding	aldo-keto reductase family 7 member A2 [Source:HGNC Symbol;Acc:HGNC:389]	-
ENSG00000176619	137.894	153.281	135.921	167.796	165.291	196.597	LMNB2	19	2427638	2456959	-	5395	protein_coding	lamin B2 [Source:HGNC Symbol;Acc:HGNC:6638]	-
ENSG00000127184	101.619	222.321	133.063	148.613	156.024	192.83	COX7C	5	86617928	86620962	+	1969	protein_coding	cytochrome c oxidase subunit 7C [Source:HGNC Symbol;Acc:HGNC:2292]	-
ENSG00000105048	119.756	257.376	138.215	165.635	133.891	138.311	TNNT1	19	55132698	55149206	-	2119	protein_coding	troponin T1, slow skeletal type [Source:HGNC Symbol;Acc:HGNC:11948]	-
ENSG00000054148	79.1757	227.765	98.0024	176.984	187.586	183.116	PHPT1	9	136848724	136851027	+	1612	protein_coding	phosphohistidine phosphatase 1 [Source:HGNC Symbol;Acc:HGNC:30033]	-
ENSG00000042493	98.8647	259.768	132.105	173.412	142.579	141.81	CAPG	2	85394753	85418432	-	2419	protein_coding	capping actin protein, gelsolin like [Source:HGNC Symbol;Acc:HGNC:1474]	-
ENSG00000099804	110.739	193.664	129.444	168.788	162.913	177.53	CDC34	19	531760	542092	+	1894	protein_coding	cell division cycle 34 [Source:HGNC Symbol;Acc:HGNC:1734]	-
ENSG00000100348	97.55	212.188	117.443	157.074	169.059	180.513	TXN2	22	36467046	36481640	-	1650	protein_coding	thioredoxin 2 [Source:HGNC Symbol;Acc:HGNC:17772]	-
ENSG00000143256	163.202	299.354	184.671	136.7	70.1691	74.3523	PFDN2	1	161100556	161118055	-	621	protein_coding	prefoldin subunit 2 [Source:HGNC Symbol;Acc:HGNC:8867]	-
ENSG00000116221	94.4622	172.889	112.534	166.465	179.046	202.663	MRPL37	1	54184041	54225464	+	2549	protein_coding	mitochondrial ribosomal protein L37 [Source:HGNC Symbol;Acc:HGNC:14034]	-
ENSG00000169692	107.296	156.716	128.126	158.773	177.825	198.721	AGPAT2	9	136673143	136687457	-	1832	protein_coding	1-acylglycerol-3-phosphate O-acyltransferase 2 [Source:HGNC Symbol;Acc:HGNC:325]	-
ENSG00000124145	230.945	251.616	281.815	60.4265	49.2775	50.4371	SDC4	20	45325288	45348424	-	2613	protein_coding	syndecan 4 [Source:HGNC Symbol;Acc:HGNC:10661]	-
ENSG00000183617	67.9986	217.995	106.352	170.526	164.941	196.395	MRPL54	19	3762682	3768575	+	985	protein_coding	mitochondrial ribosomal protein L54 [Source:HGNC Symbol;Acc:HGNC:16685]	-
ENSG00000188976	115.049	132.837	125.092	181.564	169.863	197.864	NOC2L	1	944203	959309	-	5540	protein_coding	NOC2 like nucleolar associated transcriptional repressor [Source:HGNC Symbol;Acc:HGNC:24517]	-
ENSG00000115234	104.189	208.65	128.994	153.79	149.53	175.302	SNX17	2	27370496	27377535	+	3767	protein_coding	sorting nexin 17 [Source:HGNC Symbol;Acc:HGNC:14979]	-
ENSG00000196365	120.352	169.623	138.056	174.508	161.233	155.098	LONP1	19	5691834	5720572	-	5032	protein_coding	lon peptidase 1, mitochondrial [Source:HGNC Symbol;Acc:HGNC:9479]	-
ENSG00000179115	105.41	144.502	113.109	165.887	170.248	216.47	FARSA	19	12922479	12934037	-	2434	protein_coding	phenylalanyl-tRNA synthetase subunit alpha [Source:HGNC Symbol;Acc:HGNC:3592]	-
ENSG00000184840	151.098	314.074	169.187	106.008	75.7007	98.9446	TMED9	5	177592203	177597242	+	3513	protein_coding	transmembrane p24 trafficking protein 9 [Source:HGNC Symbol;Acc:HGNC:24878]	-
ENSG00000070756	184.944	82.4236	138.837	151.423	194.451	148.713	PABPC1	8	100685816	100722809	-	4147	protein_coding	poly(A) binding protein cytoplasmic 1 [Source:HGNC Symbol;Acc:HGNC:8554]	-
ENSG00000198618	107.387	202.505	142.303	165.878	142.68	136.894	PPIAP22	21	18857779	18858276	+	498	processed_pseudogene	peptidylprolyl isomerase A pseudogene 22 [Source:HGNC Symbol;Acc:HGNC:17236]	-
ENSG00000108639	107.256	168.283	130.516	136.003	167.032	188.078	SYNGR2	17	78168558	78173527	+	4074	protein_coding	synaptogyrin 2 [Source:HGNC Symbol;Acc:HGNC:11499]	-
ENSG00000143977	76.568	237.735	116.479	128.077	153.11	183.781	SNRPG	2	70281362	70293740	-	1764	protein_coding	small nuclear ribonucleoprotein polypeptide G [Source:HGNC Symbol;Acc:HGNC:11163]	-
ENSG00000167085	118.099	264.063	139.173	130.944	100.619	142.065	PHB	17	49404049	49414905	-	3838	protein_coding	prohibitin [Source:HGNC Symbol;Acc:HGNC:8912]	-
ENSG00000109971	224.194	230.283	226.937	75.6785	48.4825	89.0803	HSPA8	11	123057489	123063230	-	4849	protein_coding	heat shock protein family A (Hsp70) member 8 [Source:HGNC Symbol;Acc:HGNC:5241]	-
ENSG00000114767	99.0109	147.354	112.606	160.976	176.717	195.2	RRP9	3	51933429	51941904	-	1542	protein_coding	ribosomal RNA processing 9, U3 small nucleolar RNA binding protein [Source:HGNC Symbol;Acc:HGNC:16829]	-
ENSG00000179085	89.124	230.001	112.87	152.785	142.637	163.673	DPM3	1	155139891	155140595	-	622	protein_coding	dolichyl-phosphate mannosyltransferase subunit 3, regulatory [Source:HGNC Symbol;Acc:HGNC:3007]	-
ENSG00000185201	98.9045	129.617	135.401	155.083	191.468	179.68	IFITM2	11	307631	315272	+	1543	protein_coding	interferon induced transmembrane protein 2 [Source:HGNC Symbol;Acc:HGNC:5413]	-
ENSG00000104969	99.2238	159.204	110.597	150.808	167.442	200.245	SGTA	19	2754715	2783282	-	3711	protein_coding	small glutamine rich tetratricopeptide repeat containing alpha [Source:HGNC Symbol;Acc:HGNC:10819]	-
ENSG00000248527	112.24	88.4593	174.553	160.061	199.207	152.682	MTATP6P1	1	633696	634376	+	681	unprocessed_pseudogene	MT-ATP6 pseudogene 1 [Source:HGNC Symbol;Acc:HGNC:44575]	-
ENSG00000143621	170.645	223.055	183.994	116.677	79.1981	110.815	ILF2	1	153661788	153671028	-	2261	protein_coding	interleukin enhancer binding factor 2 [Source:HGNC Symbol;Acc:HGNC:6037]	-
ENSG00000007520	95.7785	174.066	119.991	148.641	164.396	181.474	TSR3	16	1349240	1351878	-	1210	protein_coding	TSR3 ribosome maturation factor [Source:HGNC Symbol;Acc:HGNC:14175]	-
ENSG00000181163	148.614	163.687	176.524	182.2	113.349	97.9042	NPM1	5	171387116	171411137	+	3828	protein_coding	nucleophosmin 1 [Source:HGNC Symbol;Acc:HGNC:7910]	-
ENSG00000186468	90.2225	237.541	138.88	130.104	129.341	149.067	RPS23	5	82273320	82278396	-	4061	protein_coding	ribosomal protein S23 [Source:HGNC Symbol;Acc:HGNC:10410]	-
ENSG00000089597	156.354	140.114	154.495	157.433	112.742	147.317	GANAB	11	62624826	62646726	-	5030	protein_coding	glucosidase II alpha subunit [Source:HGNC Symbol;Acc:HGNC:4138]	-
ENSG00000173812	153.423	179.772	166.221	134.377	119.468	110.851	EIF1	17	41688885	41692668	+	3623	protein_coding	eukaryotic translation initiation factor 1 [Source:HGNC Symbol;Acc:HGNC:3249]	-
ENSG00000124562	117.455	196.47	133.876	139.571	127.346	148.091	SNRPC	6	34757505	34773857	+	1241	protein_coding	small nuclear ribonucleoprotein polypeptide C [Source:HGNC Symbol;Acc:HGNC:11157]	-
ENSG00000143368	129.632	106.791	132.703	141.928	151.425	200.039	SF3B4	1	149923317	149927803	-	1704	protein_coding	splicing factor 3b subunit 4 [Source:HGNC Symbol;Acc:HGNC:10771]	-
ENSG00000104979	116.542	163.505	114.907	187.623	126.124	152.949	C19orf53	19	13774456	13778773	+	1197	protein_coding	chromosome 19 open reading frame 53 [Source:HGNC Symbol;Acc:HGNC:24991]	-
ENSG00000185043	92.51	230.026	103.728	148.693	132.926	151.744	CIB1	15	90229975	90234047	-	1472	protein_coding	calcium and integrin binding 1 [Source:HGNC Symbol;Acc:HGNC:16920]	-
ENSG00000097021	107.331	193.878	120.858	132.399	141.331	162.369	ACOT7	1	6264269	6394391	-	4124	protein_coding	acyl-CoA thioesterase 7 [Source:HGNC Symbol;Acc:HGNC:24157]	-
ENSG00000143321	119.749	171.714	127.438	143.955	137.531	157.331	HDGF	1	156742109	156766925	-	3674	protein_coding	heparin binding growth factor [Source:HGNC Symbol;Acc:HGNC:4856]	-
ENSG00000179958	105.534	217.145	123.922	133.187	116.787	150.731	DCTPP1	16	30423615	30430030	-	1540	protein_coding	dCTP pyrophosphatase 1 [Source:HGNC Symbol;Acc:HGNC:28777]	-
ENSG00000233762	74.7014	239.186	112.326	140.03	130.229	149.535	AC007969.1	2	171517270	171517716	-	447	processed_pseudogene	ribosomal protein S15 (RPS15) pseudogene	-
ENSG00000167969	87.7102	203.393	111.188	143.251	155.501	144.001	ECI1	16	2239402	2252300	-	3204	protein_coding	enoyl-CoA delta isomerase 1 [Source:HGNC Symbol;Acc:HGNC:2703]	-
ENSG00000263266	116.5	161.252	145.267	116.641	130.281	173.545	RPS7P1	17	28467822	28468406	+	585	processed_pseudogene	ribosomal protein S7 pseudogene 1 [Source:HGNC Symbol;Acc:HGNC:17081]	-
ENSG00000175550	130.625	186.162	123.675	179.485	105.193	116.49	DRAP1	11	65919274	65921563	+	1722	protein_coding	DR1 associated protein 1 [Source:HGNC Symbol;Acc:HGNC:3019]	-
ENSG00000170043	93.399	149.378	128.758	140.114	161.586	162.268	TRAPPC1	17	7930345	7932123	-	1171	protein_coding	trafficking protein particle complex 1 [Source:HGNC Symbol;Acc:HGNC:19894]	-
ENSG00000148362	83.6874	168.539	117.578	126.289	166.227	167.991	PAXX	9	136992422	136993984	+	1363	protein_coding	PAXX non-homologous end joining factor [Source:HGNC Symbol;Acc:HGNC:27849]	-
ENSG00000178531	75.9732	85.5661	86.2309	187.583	191.682	201.755	CTXN1	19	7924491	7926135	-	1237	protein_coding	cortexin 1 [Source:HGNC Symbol;Acc:HGNC:31108]	-
ENSG00000197744	156.164	131.003	157.143	134.116	120.051	128.131	PTMAP2	5	118973796	118974122	+	327	processed_pseudogene	prothymosin alpha pseudogene 2 [Source:HGNC Symbol;Acc:HGNC:9625]	-
ENSG00000064666	115.134	129.333	119.398	145.078	144.27	173.103	CNN2	19	1026586	1039068	+	3640	protein_coding	calponin 2 [Source:HGNC Symbol;Acc:HGNC:2156]	-
ENSG00000138326	86.4517	200.184	121.204	159.567	135.758	123.045	RPS24	10	78033760	78056813	+	7829	protein_coding	ribosomal protein S24 [Source:HGNC Symbol;Acc:HGNC:10411]	-
ENSG00000138166	206.742	217.076	236.344	73.36	51.8778	40.5741	DUSP5	10	110497907	110511533	+	2535	protein_coding	dual specificity phosphatase 5 [Source:HGNC Symbol;Acc:HGNC:3071]	-
ENSG00000167680	96.1841	106.957	105.127	173.43	172.311	171.911	SEMA6B	19	4542593	4559684	-	4288	protein_coding	semaphorin 6B [Source:HGNC Symbol;Acc:HGNC:10739]	-
ENSG00000095906	60.5773	122.819	83.0088	143.702	214.847	198.312	NUBP2	16	1782932	1789186	+	4947	protein_coding	nucleotide binding protein 2 [Source:HGNC Symbol;Acc:HGNC:8042]	-
ENSG00000125995	90.7661	259.982	132.366	137.383	83.802	117.474	ROMO1	20	35699272	35700984	+	702	protein_coding	reactive oxygen species modulator 1 [Source:HGNC Symbol;Acc:HGNC:16185]	-
ENSG00000279483	95.6528	210.62	147.026	163.872	54.5856	148.538	AC090498.1	7	137513859	137513933	+	75	processed_pseudogene	ribosomal protein L41 (RPL41) pseudogene	-
ENSG00000115128	77.0439	199.196	121.869	148.529	118.692	154.828	SF3B6	2	24067586	24076373	-	1125	protein_coding	splicing factor 3b subunit 6 [Source:HGNC Symbol;Acc:HGNC:30096]	-
ENSG00000074071	95.1217	139.36	87.921	187.952	142.887	166.253	MRPS34	16	1771890	1773155	-	1097	protein_coding	mitochondrial ribosomal protein S34 [Source:HGNC Symbol;Acc:HGNC:16618]	-
ENSG00000245910	114.641	311.036	179.155	78.6322	64.536	68.6041	SNHG6	8	66921684	66926398	-	1247	lncRNA	small nucleolar RNA host gene 6 [Source:HGNC Symbol;Acc:HGNC:32965]	-
ENSG00000168003	132.917	178.164	151.555	142.428	114.35	96.8569	SLC3A2	11	62856102	62888875	+	5178	protein_coding	solute carrier family 3 member 2 [Source:HGNC Symbol;Acc:HGNC:11026]	-
ENSG00000107404	109.57	139.248	132.824	151.293	143.973	138.181	DVL1	1	1335276	1349418	-	3882	protein_coding	dishevelled segment polarity protein 1 [Source:HGNC Symbol;Acc:HGNC:3084]	-
ENSG00000100410	97.1213	206.483	130.636	94.874	116.828	165.894	PHF5A	22	41459717	41468692	-	1202	protein_coding	PHD finger protein 5A [Source:HGNC Symbol;Acc:HGNC:18000]	-
ENSG00000142627	153.414	164.871	175.555	127.509	99.7975	88.1015	EPHA2	1	16124337	16156069	-	4141	protein_coding	EPH receptor A2 [Source:HGNC Symbol;Acc:HGNC:3386]	-
ENSG00000185262	119.882	206.996	132.146	134.321	107.948	107.688	UBALD2	17	76265348	76271298	+	1650	protein_coding	UBA like domain containing 2 [Source:HGNC Symbol;Acc:HGNC:28438]	-
ENSG00000133265	83.3355	124.046	102.823	138.009	170.029	188.726	HSPBP1	19	55262223	55280381	-	2167	protein_coding	HSPA (Hsp70) binding protein 1 [Source:HGNC Symbol;Acc:HGNC:24989]	-
ENSG00000123131	136.166	262.156	151.029	98.0797	61.6741	96.0891	PRDX4	X	23664262	23686397	+	1855	protein_coding	peroxiredoxin 4 [Source:HGNC Symbol;Acc:HGNC:17169]	-
ENSG00000184363	110.896	117.654	124.052	145.983	140.683	163.3	PKP3	11	392614	404908	+	3795	protein_coding	plakophilin 3 [Source:HGNC Symbol;Acc:HGNC:9025]	-
ENSG00000125520	75.0663	101.977	89.2185	158.227	180.693	190.619	SLC2A4RG	20	63739776	63744050	+	2874	protein_coding	SLC2A4 regulator [Source:HGNC Symbol;Acc:HGNC:15930]	-
ENSG00000132432	97.6142	250.052	139.444	85.8649	101.11	119.514	SEC61G	7	54752250	54759974	-	1842	protein_coding	SEC61 translocon gamma subunit [Source:HGNC Symbol;Acc:HGNC:18277]	-
ENSG00000172889	73.281	123.844	84.5516	159.467	183.423	165.981	EGFL7	9	136658856	136672678	+	2564	protein_coding	EGF like domain multiple 7 [Source:HGNC Symbol;Acc:HGNC:20594]	-
ENSG00000177700	105.935	133.631	92.5117	206.85	115.449	135.774	POLR2L	11	837356	842529	-	1126	protein_coding	RNA polymerase II subunit L [Source:HGNC Symbol;Acc:HGNC:9199]	-
ENSG00000171223	127.264	171.371	154.739	125.146	101.651	105.825	JUNB	19	12791486	12793315	+	1830	protein_coding	JunB proto-oncogene, AP-1 transcription factor subunit [Source:HGNC Symbol;Acc:HGNC:6205]	TF_bZIP
ENSG00000164032	143.537	223.507	166.133	103.137	65.2961	83.3372	H2AFZ	4	99948086	99950355	-	2270	protein_coding	H2A histone family member Z [Source:HGNC Symbol;Acc:HGNC:4741]	-
ENSG00000067057	125.198	165.299	133.936	119.593	103.499	130.277	PFKP	10	3066333	3137718	+	5554	protein_coding	phosphofructokinase, platelet [Source:HGNC Symbol;Acc:HGNC:8878]	-
ENSG00000232472	132.937	257.075	165.459	106.189	44.0873	71.6151	EEF1B2P3	X	24788392	24789069	-	678	processed_pseudogene	eukaryotic translation elongation factor 1 beta 2 pseudogene 3 [Source:HGNC Symbol;Acc:HGNC:3210]	-
ENSG00000184216	92.0741	113.328	106.169	137.493	151.649	173.383	IRAK1	X	154010506	154019902	-	3917	protein_coding	interleukin 1 receptor associated kinase 1 [Source:HGNC Symbol;Acc:HGNC:6112]	-
ENSG00000101439	89.8797	129.165	101.881	150.131	156.282	145.789	CST3	20	23626706	23638473	-	3615	protein_coding	cystatin C [Source:HGNC Symbol;Acc:HGNC:2475]	-
ENSG00000105373	101.954	167.363	127.449	142.948	105.844	126.412	NOP53	19	47745546	47757058	+	5317	protein_coding	NOP53 ribosome biogenesis factor [Source:HGNC Symbol;Acc:HGNC:4333]	-
ENSG00000101220	75.1557	93.6063	88.9464	146.752	175.024	191.482	C20orf27	20	3753508	3768387	-	2415	protein_coding	chromosome 20 open reading frame 27 [Source:HGNC Symbol;Acc:HGNC:15873]	-
ENSG00000183011	55.1817	136.877	71.2431	147.179	178.028	179.436	NAA38	17	7856685	7885238	-	1943	protein_coding	N(alpha)-acetyltransferase 38, NatC auxiliary subunit [Source:HGNC Symbol;Acc:HGNC:28212]	-
ENSG00000079462	80.109	156.101	97.2405	122.299	158.916	152.77	PAFAH1B3	19	42297033	42303546	-	1419	protein_coding	platelet activating factor acetylhydrolase 1b catalytic subunit 3 [Source:HGNC Symbol;Acc:HGNC:8576]	-
ENSG00000127528	112.693	119.274	117.41	152.259	131.31	131.936	KLF2	19	16324817	16327874	+	2018	protein_coding	Kruppel like factor 2 [Source:HGNC Symbol;Acc:HGNC:6347]	zf-C2H2
ENSG00000196923	124.679	158.099	163.507	106.235	109.681	102.482	PDLIM7	5	177483394	177497606	-	4407	protein_coding	PDZ and LIM domain 7 [Source:HGNC Symbol;Acc:HGNC:22958]	-
ENSG00000135446	97.9953	216.047	117.849	132.563	87.0942	111.733	CDK4	12	57747727	57756013	-	3094	protein_coding	cyclin dependent kinase 4 [Source:HGNC Symbol;Acc:HGNC:1773]	-
ENSG00000125356	101.312	213.257	98.8325	180.105	71.2669	98.1908	NDUFA1	X	119871832	119876662	+	421	protein_coding	NADH:ubiquinone oxidoreductase subunit A1 [Source:HGNC Symbol;Acc:HGNC:7683]	-
ENSG00000101182	151.207	216.543	152.691	97.1374	60.0183	82.5423	PSMA7	20	62136733	62143440	-	1752	protein_coding	proteasome subunit alpha 7 [Source:HGNC Symbol;Acc:HGNC:9536]	-
ENSG00000127589	88.357	98.1376	98.4344	119.306	160.236	192.487	TUBBP1	8	30351873	30353518	+	1646	transcribed_processed_pseudogene	tubulin beta pseudogene 1 [Source:HGNC Symbol;Acc:HGNC:12414]	-
ENSG00000186891	75.5315	139.1	101.276	140.768	155.844	143.493	TNFRSF18	1	1203508	1206592	-	1271	protein_coding	TNF receptor superfamily member 18 [Source:HGNC Symbol;Acc:HGNC:11914]	-
ENSG00000172216	146.962	148.646	147.506	141.114	94.0174	76.8086	CEBPB	20	50190830	50192668	+	1839	protein_coding	CCAAT enhancer binding protein beta [Source:HGNC Symbol;Acc:HGNC:1834]	TF_bZIP
ENSG00000160014	104.672	132.138	107.96	133.68	123.357	152.791	CALM3	19	46601074	46610782	+	5235	protein_coding	calmodulin 3 [Source:HGNC Symbol;Acc:HGNC:1449]	-
ENSG00000184990	61.3287	168.885	83.4776	120.588	164.033	154.338	SIVA1	14	104753147	104768494	+	4729	protein_coding	SIVA1 apoptosis inducing factor [Source:HGNC Symbol;Acc:HGNC:17712]	-
ENSG00000177156	113.251	197.955	125.632	119.512	87.353	107.568	TALDO1	11	747415	765012	+	2907	protein_coding	transaldolase 1 [Source:HGNC Symbol;Acc:HGNC:11559]	-
ENSG00000125912	96.8504	106.881	110.437	120.889	143.675	172.184	NCLN	19	3185563	3209575	+	4175	protein_coding	nicalin [Source:HGNC Symbol;Acc:HGNC:26923]	-
ENSG00000090861	134.568	156.249	147.059	139.771	95.3303	76.8409	AARS	16	70252295	70289543	-	4498	protein_coding	alanyl-tRNA synthetase [Source:HGNC Symbol;Acc:HGNC:20]	-
ENSG00000197785	82.0488	106.353	89.6272	134.08	154.189	180.191	ATAD3A	1	1512162	1534685	+	3344	protein_coding	ATPase family AAA domain containing 3A [Source:HGNC Symbol;Acc:HGNC:25567]	-
ENSG00000089009	146.069	162.095	154.432	124.55	80.4581	78.5729	RPL6	12	112405190	112418838	-	4447	protein_coding	ribosomal protein L6 [Source:HGNC Symbol;Acc:HGNC:10362]	-
ENSG00000132963	95.8193	191.249	128.372	120.08	99.7338	110.273	POMP	13	28659104	28678959	+	1462	protein_coding	proteasome maturation protein [Source:HGNC Symbol;Acc:HGNC:20330]	-
ENSG00000108604	94.0155	133.405	104.428	124.161	132.745	156.106	SMARCD2	17	63832081	63843065	-	3662	protein_coding	SWI/SNF related, matrix associated, actin dependent regulator of chromatin, subfamily d, member 2 [Source:HGNC Symbol;Acc:HGNC:11107]	-
ENSG00000166595	100.288	129.827	92.5156	175.758	116.342	123.87	CIAO2B	16	66932065	66934423	-	1060	protein_coding	cytosolic iron-sulfur assembly component 2B [Source:HGNC Symbol;Acc:HGNC:24261]	-
ENSG00000171863	97.0187	164.497	122.921	99.5808	111.087	143.146	RPS7	2	3575260	3580920	+	5529	protein_coding	ribosomal protein S7 [Source:HGNC Symbol;Acc:HGNC:10440]	-
ENSG00000167642	96.5121	204.414	120.166	110.402	95.5088	106.083	SPINT2	19	38244035	38292615	+	5085	protein_coding	serine peptidase inhibitor, Kunitz type 2 [Source:HGNC Symbol;Acc:HGNC:11247]	-
ENSG00000014216	83.8601	106.733	93.349	138.5	155.301	155.102	CAPN1	11	65180566	65212006	+	7553	protein_coding	calpain 1 [Source:HGNC Symbol;Acc:HGNC:1476]	-
ENSG00000077348	61.7853	149.591	83.5621	136.825	155.699	145.098	EXOSC5	19	41386374	41397359	-	1368	protein_coding	exosome component 5 [Source:HGNC Symbol;Acc:HGNC:24662]	-
ENSG00000159199	76.1664	148.902	93.1354	126.051	143.044	144.953	ATP5MC1	17	48892765	48895871	+	2615	protein_coding	ATP synthase membrane subunit c locus 1 [Source:HGNC Symbol;Acc:HGNC:841]	-
ENSG00000234797	88.0235	212.057	112.813	120.044	89.0243	109.812	RPS3AP6	15	59768352	59769146	+	795	processed_pseudogene	ribosomal protein S3A pseudogene 6 [Source:HGNC Symbol;Acc:HGNC:18630]	-
ENSG00000011304	113.617	105.362	108.171	123.851	122.51	157.16	PTBP1	19	797075	812327	+	6883	protein_coding	polypyrimidine tract binding protein 1 [Source:HGNC Symbol;Acc:HGNC:9583]	-
ENSG00000169727	72.3488	112.721	88.2636	132.455	160.07	164.399	GPS1	17	82050691	82057470	+	6155	protein_coding	G protein pathway suppressor 1 [Source:HGNC Symbol;Acc:HGNC:4549]	-
ENSG00000116661	76.4139	135.491	99.1952	149.927	141.098	121.523	FBXO2	1	11637018	11655785	-	3163	protein_coding	F-box protein 2 [Source:HGNC Symbol;Acc:HGNC:13581]	-
ENSG00000105401	120.424	127.531	108.723	149.113	97.8377	119.447	CDC37	19	10391133	10420121	-	3042	protein_coding	cell division cycle 37 [Source:HGNC Symbol;Acc:HGNC:1735]	-
ENSG00000142227	116.877	197.588	120.705	98.1891	88.5365	98.1761	EMP3	19	48321509	48330553	+	1645	protein_coding	epithelial membrane protein 3 [Source:HGNC Symbol;Acc:HGNC:3335]	-
ENSG00000110107	101.703	129.022	112.524	117.824	114.007	142.938	PRPF19	11	60890547	60906585	-	2919	protein_coding	pre-mRNA processing factor 19 [Source:HGNC Symbol;Acc:HGNC:17896]	-
ENSG00000088832	99.7121	155.253	106.918	103.308	126.264	125.231	FKBP1A	20	1368978	1393172	-	2577	protein_coding	FKBP prolyl isomerase 1A [Source:HGNC Symbol;Acc:HGNC:3711]	-
ENSG00000092841	101.513	206.568	113.851	142.554	60.5345	89.8424	MYL6	12	56158161	56163496	+	4609	protein_coding	myosin light chain 6 [Source:HGNC Symbol;Acc:HGNC:7587]	-
ENSG00000242071	125.632	148.297	111.784	167.776	64.0626	96.394	RPL7AP6	14	69885340	69886140	-	801	processed_pseudogene	ribosomal protein L7a pseudogene 6 [Source:HGNC Symbol;Acc:HGNC:19785]	-
ENSG00000105669	83.0251	161.511	100.285	108.625	127.319	133.087	COPE	19	18899514	18919387	-	2875	protein_coding	coatomer protein complex subunit epsilon [Source:HGNC Symbol;Acc:HGNC:2234]	-
ENSG00000198467	101.443	165.397	103.584	145.314	88.588	107.992	TPM2	9	35681992	35690056	-	3183	protein_coding	tropomyosin 2 [Source:HGNC Symbol;Acc:HGNC:12011]	-
ENSG00000105281	102.25	136.547	117.881	135.006	121.621	97.233	SLC1A5	19	46774883	46788594	-	3332	protein_coding	solute carrier family 1 member 5 [Source:HGNC Symbol;Acc:HGNC:10943]	-
ENSG00000210144	146.246	86.5412	128.091	199.446	52.6822	95.5431	MT-TY	MT	5826	5891	-	66	Mt_tRNA	mitochondrially encoded tRNA-Tyr (UAU/C) [Source:HGNC Symbol;Acc:HGNC:7502]	-
ENSG00000131652	69.0046	126.047	95.8438	123.994	150.725	141.787	THOC6	16	3024027	3027755	+	1860	protein_coding	THO complex 6 [Source:HGNC Symbol;Acc:HGNC:28369]	-
ENSG00000112667	72.3657	139.437	80.1588	144.852	134.819	134.917	DNPH1	6	43225629	43229484	-	1250	protein_coding	2'-deoxynucleoside 5'-phosphate N-hydrolase 1 [Source:HGNC Symbol;Acc:HGNC:21218]	-
ENSG00000064961	85.5762	170.393	97.2997	137.072	103.264	111.846	HMG20B	19	3572777	3579088	+	3857	protein_coding	high mobility group 20B [Source:HGNC Symbol;Acc:HGNC:5002]	HMG
ENSG00000233913	96.0572	257.775	115.342	80.6968	71.4708	82.014	RPL10P9	5	168616352	168616996	+	645	processed_pseudogene	ribosomal protein L10 pseudogene 9 [Source:HGNC Symbol;Acc:HGNC:35579]	-
ENSG00000162302	81.595	98.6929	87.9764	127.07	143.23	164.644	RPS6KA4	11	64359148	64372215	+	3807	protein_coding	ribosomal protein S6 kinase A4 [Source:HGNC Symbol;Acc:HGNC:10433]	-
ENSG00000130985	92.0263	102.944	99.5175	125.119	125.283	157.535	UBA1	X	47190861	47215128	+	6437	protein_coding	ubiquitin like modifier activating enzyme 1 [Source:HGNC Symbol;Acc:HGNC:12469]	-
ENSG00000233493	76.8538	101.316	80.8116	185.537	118.698	139.122	TMEM238	19	55379244	55384292	-	695	protein_coding	transmembrane protein 238 [Source:HGNC Symbol;Acc:HGNC:40042]	-
ENSG00000125652	70.4686	151.791	97.1881	124.858	134.533	122.566	ALKBH7	19	6372794	6375250	+	1093	protein_coding	alkB homolog 7 [Source:HGNC Symbol;Acc:HGNC:21306]	-
ENSG00000143537	70.3191	92.3361	83.1266	138.901	164.546	151.059	ADAM15	1	155050566	155062775	+	6584	protein_coding	ADAM metallopeptidase domain 15 [Source:HGNC Symbol;Acc:HGNC:193]	-
ENSG00000123349	78.7437	191.271	100.309	122.498	81.2678	125.454	PFDN5	12	53295291	53299450	+	3380	protein_coding	prefoldin subunit 5 [Source:HGNC Symbol;Acc:HGNC:8869]	-
ENSG00000189159	108.722	128.602	117.004	104.349	111.158	129.207	JPT1	17	75135248	75168281	-	3406	protein_coding	Jupiter microtubule associated homolog 1 [Source:HGNC Symbol;Acc:HGNC:14569]	-
ENSG00000110717	72.2687	142.146	95.2925	122.249	131.963	134.77	NDUFS8	11	68030617	68036644	+	4523	protein_coding	NADH:ubiquinone oxidoreductase core subunit S8 [Source:HGNC Symbol;Acc:HGNC:7715]	-
ENSG00000069482	89.0474	112.793	100.374	137.886	114.147	141.046	GAL	11	68683779	68691175	+	1300	protein_coding	galanin and GMAP prepropeptide [Source:HGNC Symbol;Acc:HGNC:4114]	-
ENSG00000188186	62.725	149.219	80.2721	139.178	127.109	136.764	LAMTOR4	7	100148907	100155944	+	1936	protein_coding	late endosomal/lysosomal adaptor, MAPK and MTOR activator 4 [Source:HGNC Symbol;Acc:HGNC:33772]	-
novel.743	99.1489	249.754	170.094	75.2885	11.8949	88.5974	-	CHR_HSCHR6_MHC_DBB_CTG1	29932438	29935859	+	1603	-	- && P01892.1 RecName: Full=HLA class I histocompatibility antigen, A-2 alpha chain; AltName: Full=MHC class I antigen A*2; Flags: Precursor && PF06623:MHC_I C-terminus	-
ENSG00000005884	117.914	140.979	140.884	117.877	87.9263	87.7206	ITGA3	17	50055968	50090481	+	9802	protein_coding	integrin subunit alpha 3 [Source:HGNC Symbol;Acc:HGNC:6139]	-
ENSG00000228474	92.0658	180.871	104.266	135.888	77.6723	102.295	OST4	2	27070472	27071654	-	600	protein_coding	oligosaccharyltransferase complex subunit 4, non-catalytic [Source:HGNC Symbol;Acc:HGNC:32483]	-
ENSG00000168528	93.5569	108.299	109.567	114.087	140.154	120.137	SERINC2	1	31409565	31434680	+	3452	protein_coding	serine incorporator 2 [Source:HGNC Symbol;Acc:HGNC:23231]	-
ENSG00000105677	73.6112	130.14	93.3125	129.267	126.073	132.822	TMEM147	19	35545600	35547526	+	1927	protein_coding	transmembrane protein 147 [Source:HGNC Symbol;Acc:HGNC:30414]	-
ENSG00000099821	74.4591	92.8437	92.1385	110.324	140.413	174.65	POLRMT	19	617221	633537	-	5060	protein_coding	RNA polymerase mitochondrial [Source:HGNC Symbol;Acc:HGNC:9200]	-
ENSG00000198832	70.477	155.165	99.0018	106.315	127.524	124.301	SELENOM	22	31104772	31120069	-	3187	protein_coding	selenoprotein M [Source:HGNC Symbol;Acc:HGNC:30397]	-
ENSG00000178896	63.2415	141.467	78.7111	103.6	134.417	157.823	EXOSC4	8	144078648	144080648	+	1386	protein_coding	exosome component 4 [Source:HGNC Symbol;Acc:HGNC:18189]	-
ENSG00000196976	72.3649	143.508	87.2243	141.54	110.98	122.411	LAGE3	X	154477769	154479257	-	949	protein_coding	L antigen family member 3 [Source:HGNC Symbol;Acc:HGNC:26058]	-
ENSG00000168894	95.3717	216.225	116.335	98.2638	63.6723	87.8609	RNF181	2	85595725	85597708	+	1315	protein_coding	ring finger protein 181 [Source:HGNC Symbol;Acc:HGNC:28037]	-
ENSG00000115457	66.6344	116.497	86.5043	125.37	146.14	135.756	IGFBP2	2	216632828	216664436	+	4742	protein_coding	insulin like growth factor binding protein 2 [Source:HGNC Symbol;Acc:HGNC:5471]	-
ENSG00000188483	62.2096	64.5796	57.4813	165.745	157.524	169.345	IER5L	9	129175552	129178261	-	2710	protein_coding	immediate early response 5 like [Source:HGNC Symbol;Acc:HGNC:23679]	-
ENSG00000123159	77.3506	136.019	97.256	117.395	122.608	125.801	GIPC1	19	14477760	14496149	-	4440	protein_coding	GIPC PDZ domain containing family member 1 [Source:HGNC Symbol;Acc:HGNC:1226]	-
ENSG00000100823	114.045	158.096	120.833	115.234	73.8034	93.6924	APEX1	14	20455191	20457772	+	1886	protein_coding	apurinic/apyrimidinic endodeoxyribonuclease 1 [Source:HGNC Symbol;Acc:HGNC:587]	-
ENSG00000164897	91.9627	107.295	100.065	131.002	119.476	121.784	TMUB1	7	151081085	151083493	-	1963	protein_coding	transmembrane and ubiquitin like domain containing 1 [Source:HGNC Symbol;Acc:HGNC:21709]	-
ENSG00000161203	96.62	136.477	98.337	111.713	105.523	122.348	AP2M1	3	184174689	184184091	+	4756	protein_coding	adaptor related protein complex 2 subunit mu 1 [Source:HGNC Symbol;Acc:HGNC:564]	-
ENSG00000102119	88.5606	108.42	101.463	133.124	115.549	123.377	EMD	X	154379197	154381523	+	2020	protein_coding	emerin [Source:HGNC Symbol;Acc:HGNC:3331]	-
ENSG00000126254	90.2879	116.189	94.5408	123.696	117.043	126.822	RBM42	19	35629030	35637686	+	2206	protein_coding	RNA binding motif protein 42 [Source:HGNC Symbol;Acc:HGNC:28117]	-
ENSG00000100116	60.3822	94.5902	77.4963	146.674	148.546	139.764	GCAT	22	37807905	37817176	+	2104	protein_coding	glycine C-acetyltransferase [Source:HGNC Symbol;Acc:HGNC:4188]	-
ENSG00000133315	61.7018	136.295	79.7913	129.643	137.126	120.441	MACROD1	11	63998558	64166113	-	2096	protein_coding	mono-ADP ribosylhydrolase 1 [Source:HGNC Symbol;Acc:HGNC:29598]	-
ENSG00000099817	74.7393	89.5022	81.0758	139.451	126.004	151.481	POLR2E	19	1086574	1095380	-	4870	protein_coding	RNA polymerase II subunit E [Source:HGNC Symbol;Acc:HGNC:9192]	-
ENSG00000010438	68.4316	192.865	98.1648	99.8125	107.14	93.9392	PRSS3	9	33750466	33799231	+	1664	protein_coding	serine protease 3 [Source:HGNC Symbol;Acc:HGNC:9486]	-
ENSG00000132470	79.2433	90.4996	87.4417	144.483	138.058	120.564	ITGB4	17	75721328	75757818	+	6761	protein_coding	integrin subunit beta 4 [Source:HGNC Symbol;Acc:HGNC:6158]	-
ENSG00000228300	60.5816	117.944	77.722	128.201	134.798	140.464	FAM174C	19	1275530	1279244	+	2096	protein_coding	family with sequence similarity 174 member C [Source:HGNC Symbol;Acc:HGNC:26073]	-
ENSG00000099800	72.7037	125.019	75.457	127.863	121.127	136.719	TIMM13	19	2425625	2427586	-	1664	protein_coding	translocase of inner mitochondrial membrane 13 [Source:HGNC Symbol;Acc:HGNC:11816]	-
ENSG00000092199	112.206	217.735	127.293	90.7113	34.3285	76.3822	HNRNPC	14	21209136	21269494	-	7309	protein_coding	heterogeneous nuclear ribonucleoprotein C (C1/C2) [Source:HGNC Symbol;Acc:HGNC:5035]	-
ENSG00000105220	73.3639	78.9673	77.8152	116.053	139.872	172.099	GPI	19	34359480	34402413	+	10680	protein_coding	glucose-6-phosphate isomerase [Source:HGNC Symbol;Acc:HGNC:4458]	-
ENSG00000129354	65.2178	114.238	77.7633	140.661	128.145	131.174	AP1M2	19	10572671	10587315	-	2214	protein_coding	adaptor related protein complex 1 subunit mu 2 [Source:HGNC Symbol;Acc:HGNC:558]	-
ENSG00000178057	76.0559	97.7723	83.0056	129.693	127.977	142.158	NDUFAF3	3	49020459	49023495	+	1727	protein_coding	NADH:ubiquinone oxidoreductase complex assembly factor 3 [Source:HGNC Symbol;Acc:HGNC:29918]	-
ENSG00000167779	83.0001	159.064	110.925	111.169	97.871	93.4373	IGFBP6	12	53097436	53102345	+	1346	protein_coding	insulin like growth factor binding protein 6 [Source:HGNC Symbol;Acc:HGNC:5475]	-
ENSG00000142168	110.085	200.548	127.947	95.8676	59.6087	60.3829	SOD1	21	31659622	31668931	+	2019	protein_coding	superoxide dismutase 1 [Source:HGNC Symbol;Acc:HGNC:11179]	-
ENSG00000063244	88.3729	96.0556	87.5906	123.941	111.004	146.634	U2AF2	19	55654146	55674715	+	4115	protein_coding	U2 small nuclear RNA auxiliary factor 2 [Source:HGNC Symbol;Acc:HGNC:23156]	-
ENSG00000197457	76.6508	97.7312	87.1528	115.275	129.973	145.265	STMN3	20	63639705	63657682	-	3029	protein_coding	stathmin 3 [Source:HGNC Symbol;Acc:HGNC:15926]	-
ENSG00000007376	62.0146	96.8197	73.699	114.02	134.785	167.609	RPUSD1	16	784974	788397	-	2769	protein_coding	RNA pseudouridine synthase domain containing 1 [Source:HGNC Symbol;Acc:HGNC:14173]	-
ENSG00000165678	119.183	203.669	149.526	78.8051	43.0614	54.3871	GHITM	10	84139509	84153568	+	2382	protein_coding	growth hormone inducible transmembrane protein [Source:HGNC Symbol;Acc:HGNC:17281]	-
ENSG00000076924	85.7797	116.079	101.683	102.639	120.744	120.69	XAB2	19	7619525	7629545	-	4653	protein_coding	XPA binding protein 2 [Source:HGNC Symbol;Acc:HGNC:14089]	-
ENSG00000149823	64.3758	92.0071	77.927	123.05	149.821	137.388	VPS51	11	65089324	65111862	+	4880	protein_coding	VPS51 subunit of GARP complex [Source:HGNC Symbol;Acc:HGNC:1172]	-
ENSG00000100353	107.516	150.826	108.486	93.8275	79.9078	103.177	EIF3D	22	36510855	36529184	-	3813	protein_coding	eukaryotic translation initiation factor 3 subunit D [Source:HGNC Symbol;Acc:HGNC:3278]	-
ENSG00000117592	95.7525	109.597	102.969	112.205	105.683	116.846	PRDX6	1	173477330	173488815	+	2311	protein_coding	peroxiredoxin 6 [Source:HGNC Symbol;Acc:HGNC:16753]	-
ENSG00000137409	78.5075	114.569	99.7813	106.198	117.329	121.527	MTCH1	6	36968141	36986298	-	3126	protein_coding	mitochondrial carrier 1 [Source:HGNC Symbol;Acc:HGNC:17586]	-
ENSG00000111667	79.5769	106.125	80.7504	123.577	118.238	127.909	USP5	12	6852128	6866632	+	3738	protein_coding	ubiquitin specific peptidase 5 [Source:HGNC Symbol;Acc:HGNC:12628]	-
ENSG00000109062	72.6904	92.3362	78.8247	107.101	123.623	160.709	SLC9A3R1	17	74748628	74769353	+	2339	protein_coding	SLC9A3 regulator 1 [Source:HGNC Symbol;Acc:HGNC:11075]	-
ENSG00000108479	45.674	91.7944	65.1456	126.148	166.85	137.549	GALK1	17	75751594	75765236	-	2416	protein_coding	galactokinase 1 [Source:HGNC Symbol;Acc:HGNC:4118]	-
ENSG00000145741	116.134	92.2844	140.977	115.618	82.5644	85.4298	BTF3	5	73498408	73505635	+	2467	protein_coding	basic transcription factor 3 [Source:HGNC Symbol;Acc:HGNC:1125]	-
ENSG00000117448	79.1139	174.631	99.8941	103.85	90.1502	84.5449	AKR1A1	1	45550543	45570049	+	3121	protein_coding	aldo-keto reductase family 1 member A1 [Source:HGNC Symbol;Acc:HGNC:380]	-
ENSG00000178741	113.713	115.629	95.7445	118.215	83.7833	104.728	COX5A	15	74919791	74938083	-	1326	protein_coding	cytochrome c oxidase subunit 5A [Source:HGNC Symbol;Acc:HGNC:2267]	-
ENSG00000121900	74.9751	113.305	78.9605	128.539	117.109	118.522	TMEM54	1	32894594	32901438	-	1417	protein_coding	transmembrane protein 54 [Source:HGNC Symbol;Acc:HGNC:24143]	-
ENSG00000203950	78.5191	88.6812	99.1411	124.871	119.699	120.412	RTL8A	X	135050932	135052196	-	1265	protein_coding	retrotransposon Gag like 8A [Source:HGNC Symbol;Acc:HGNC:24514]	-
ENSG00000224877	52.0184	135.435	78.0151	102.271	119.534	143.845	NDUFAF8	17	81239305	81241310	+	1339	protein_coding	NADH:ubiquinone oxidoreductase complex assembly factor 8 [Source:HGNC Symbol;Acc:HGNC:33551]	-
ENSG00000125817	74.8312	100.085	85.7484	116.125	118.411	135.184	CENPB	20	3783851	3786740	-	2890	protein_coding	centromere protein B [Source:HGNC Symbol;Acc:HGNC:1852]	-
ENSG00000130731	51.996	109.436	71.5046	116.155	141.367	139.862	METTL26	16	634427	636366	-	1830	protein_coding	methyltransferase like 26 [Source:HGNC Symbol;Acc:HGNC:14141]	-
ENSG00000125901	84.6676	144.234	99.4888	119.712	72.2541	109.718	MRPS26	20	3046052	3048250	+	1016	protein_coding	mitochondrial ribosomal protein S26 [Source:HGNC Symbol;Acc:HGNC:14045]	-
ENSG00000119421	98.8812	175.05	107.892	103.497	61.0335	80.871	NDUFA8	9	122144058	122159779	-	804	protein_coding	NADH:ubiquinone oxidoreductase subunit A8 [Source:HGNC Symbol;Acc:HGNC:7692]	-
ENSG00000142273	61.8214	110.049	79.7114	115.001	134.553	125.882	CBLC	19	44777869	44800652	+	1613	protein_coding	Cbl proto-oncogene C [Source:HGNC Symbol;Acc:HGNC:15961]	-
ENSG00000128564	129.097	141.927	148.535	83.5748	56.395	64.3395	VGF	7	101162509	101165569	-	2680	protein_coding	VGF nerve growth factor inducible [Source:HGNC Symbol;Acc:HGNC:12684]	-
ENSG00000187778	67.7577	133.499	77.2103	101.039	108.155	133.34	MCRS1	12	49556544	49568145	-	3261	protein_coding	microspherule protein 1 [Source:HGNC Symbol;Acc:HGNC:6960]	-
ENSG00000196205	140.343	142.125	131.837	91.143	62.6622	52.2082	EEF1A1P5	9	133019486	133020874	+	1389	processed_pseudogene	eukaryotic translation elongation factor 1 alpha 1 pseudogene 5 [Source:HGNC Symbol;Acc:HGNC:3200]	-
ENSG00000100994	92.909	127.56	107.201	112.09	96.0149	81.2445	PYGB	20	25248085	25298012	+	4456	protein_coding	glycogen phosphorylase B [Source:HGNC Symbol;Acc:HGNC:9723]	-
ENSG00000172336	78.605	165.168	98.8514	94.1427	73.995	104.982	POP7	7	100706121	100707486	+	911	protein_coding	POP7 homolog, ribonuclease P/MRP subunit [Source:HGNC Symbol;Acc:HGNC:19949]	-
ENSG00000105568	64.3732	82.8529	72.2339	106.707	134.548	154.336	PPP2R1A	19	52190048	52229518	+	7413	protein_coding	protein phosphatase 2 scaffold subunit Aalpha [Source:HGNC Symbol;Acc:HGNC:9302]	-
ENSG00000117362	67.5839	135.526	81.6837	95.4326	122.432	108.92	APH1A	1	150265399	150269580	-	3473	protein_coding	aph-1 homolog A, gamma-secretase subunit [Source:HGNC Symbol;Acc:HGNC:29509]	-
ENSG00000113758	83.6276	92.6976	88.9798	115.756	106.257	123.623	DBN1	5	177456608	177474401	-	5119	protein_coding	drebrin 1 [Source:HGNC Symbol;Acc:HGNC:2695]	-
ENSG00000185641	88.1227	204.332	115.69	93.9887	51.5705	56.916	AC034236.1	5	116051917	116052289	-	373	processed_pseudogene	ribosomal protein S25 (RPS25) pseudogene	-
ENSG00000115255	61.1055	83.4424	73.7305	123.403	127.937	140.889	REEP6	19	1491166	1497927	+	2030	protein_coding	receptor accessory protein 6 [Source:HGNC Symbol;Acc:HGNC:30078]	-
ENSG00000135390	73.1823	88.7989	76.8246	130.64	116.906	123.841	ATP5MC2	12	53632726	53677408	-	3996	protein_coding	ATP synthase membrane subunit c locus 2 [Source:HGNC Symbol;Acc:HGNC:842]	-
ENSG00000167700	40.48	72.4418	54.642	131.013	167.077	144.387	MFSD3	8	144509070	144511213	+	1827	protein_coding	major facilitator superfamily domain containing 3 [Source:HGNC Symbol;Acc:HGNC:25157]	-
novel.812	100.935	148.798	162.691	59.3775	61.1126	75.3034	-	CHR_HSCHR6_MHC_SSTO_CTG1	31349011	31350120	-	535	-	- && P30481.1 RecName: Full=HLA class I histocompatibility antigen, B-44 alpha chain; AltName: Full=Bw-44; AltName: Full=MHC class I antigen B*44; Flags: Precursor && -	-
ENSG00000136877	60.4729	87.3613	77.6274	98.3233	136.814	142.197	FPGS	9	127794597	127814327	+	3931	protein_coding	folylpolyglutamate synthase [Source:HGNC Symbol;Acc:HGNC:3824]	-
ENSG00000101457	97.582	210.296	113.5	69.1041	49.1987	61.6542	DNTTIP1	20	45791954	45811427	+	1866	protein_coding	deoxynucleotidyltransferase terminal interacting protein 1 [Source:HGNC Symbol;Acc:HGNC:16160]	-
ENSG00000171552	106.82	162.737	112.421	86.7169	67.7068	63.236	BCL2L1	20	31664452	31723989	-	3314	protein_coding	BCL2 like 1 [Source:HGNC Symbol;Acc:HGNC:992]	-
ENSG00000147955	88.0559	123.912	107.491	96.398	86.42	96.1319	SIGMAR1	9	34634722	34637809	-	2196	protein_coding	sigma non-opioid intracellular receptor 1 [Source:HGNC Symbol;Acc:HGNC:8157]	-
ENSG00000175130	61.1259	71.8121	75.3201	108.473	128.377	153.001	MARCKSL1	1	32333839	32336233	-	1546	protein_coding	MARCKS like 1 [Source:HGNC Symbol;Acc:HGNC:7142]	-
ENSG00000141552	64.8615	182.525	90.5087	83.6713	88.4736	87.7595	ANAPC11	17	81890790	81900991	+	4027	protein_coding	anaphase promoting complex subunit 11 [Source:HGNC Symbol;Acc:HGNC:14452]	-
ENSG00000189143	108.229	132.312	126.014	80.6441	75.1047	75.1164	CLDN4	7	73799542	73832693	+	4702	protein_coding	claudin 4 [Source:HGNC Symbol;Acc:HGNC:2046]	-
ENSG00000160877	74.8159	80.5773	80.2188	119.8	108.041	133.354	NACC1	19	13116862	13141147	+	4736	protein_coding	nucleus accumbens associated 1 [Source:HGNC Symbol;Acc:HGNC:20967]	-
ENSG00000126602	77.071	106.723	86.5053	109.04	98.1067	118.622	TRAP1	16	3651639	3717553	-	5183	protein_coding	TNF receptor associated protein 1 [Source:HGNC Symbol;Acc:HGNC:16264]	-
ENSG00000110711	59.3462	131.523	70.9813	109.851	112.704	111.638	AIP	11	67483026	67491103	+	1655	protein_coding	aryl hydrocarbon receptor interacting protein [Source:HGNC Symbol;Acc:HGNC:358]	-
ENSG00000118680	115.684	132.39	140.938	86.0364	58.7806	61.6876	MYL12B	18	3261479	3278431	+	1932	protein_coding	myosin light chain 12B [Source:HGNC Symbol;Acc:HGNC:29827]	-
ENSG00000131188	63.8041	93.8784	81.3552	114.897	113.282	123.863	PRR7	5	177446445	177456286	+	1753	protein_coding	proline rich 7, synaptic [Source:HGNC Symbol;Acc:HGNC:28130]	-
ENSG00000030582	71.7137	90.0307	91.5368	112.595	108.12	114.899	GRN	17	44345246	44353106	+	3524	protein_coding	granulin precursor [Source:HGNC Symbol;Acc:HGNC:4601]	-
ENSG00000132698	68.2296	94.3182	81.6958	112.65	120.164	111.382	RAB25	1	156061160	156070504	+	1689	protein_coding	RAB25, member RAS oncogene family [Source:HGNC Symbol;Acc:HGNC:18238]	-
ENSG00000211450	71.6688	175.045	88.5666	98.6575	67.6622	85.537	SELENOH	11	57741250	57743554	+	2305	protein_coding	selenoprotein H [Source:HGNC Symbol;Acc:HGNC:18251]	-
ENSG00000180879	82.151	174.854	96.5626	83.2738	71.9936	77.7868	SSR4	X	153793516	153798499	+	4564	protein_coding	signal sequence receptor subunit 4 [Source:HGNC Symbol;Acc:HGNC:11326]	-
ENSG00000100401	85.7416	110.873	94.7231	91.8246	86.9634	112.735	RANGAP1	22	41245611	41286251	-	5348	protein_coding	Ran GTPase activating protein 1 [Source:HGNC Symbol;Acc:HGNC:9854]	-
ENSG00000065978	144.344	101.864	93.9756	104.569	61.6314	75.2244	YBX1	1	42682418	42703805	+	3395	protein_coding	Y-box binding protein 1 [Source:HGNC Symbol;Acc:HGNC:8014]	CSD
ENSG00000108344	87.7603	108.706	85.9212	101.466	85.837	111.753	PSMD3	17	39980807	39997959	+	4953	protein_coding	proteasome 26S subunit, non-ATPase 3 [Source:HGNC Symbol;Acc:HGNC:9560]	-
ENSG00000168393	65.2178	151.446	73.6358	86.6172	90.8424	112.939	DTYMK	2	241675747	241686944	-	2399	protein_coding	deoxythymidylate kinase [Source:HGNC Symbol;Acc:HGNC:3061]	-
ENSG00000126934	67.7837	92.058	75.8157	114.825	120.795	108.657	MAP2K2	19	4090321	4124129	-	5236	protein_coding	mitogen-activated protein kinase kinase 2 [Source:HGNC Symbol;Acc:HGNC:6842]	-
ENSG00000234287	62.916	210.69	77.8375	77.4322	79.6131	68.4164	AC099560.2	3	40761545	40761799	+	255	processed_pseudogene	ribosomal protein S27 (RPS27) pseudogene	-
ENSG00000141971	56.1509	108.591	69.9944	107.682	122.951	107.96	MVB12A	19	17405722	17433724	+	3280	protein_coding	multivesicular body subunit 12A [Source:HGNC Symbol;Acc:HGNC:25153]	-
ENSG00000106367	79.9964	133.79	77.2775	103.646	80.3091	97.5713	AP1S1	7	101154456	101161596	+	1699	protein_coding	adaptor related protein complex 1 subunit sigma 1 [Source:HGNC Symbol;Acc:HGNC:559]	-
ENSG00000178209	103.966	97.2347	113.093	95.0825	72.9341	90.2255	PLEC	8	143915147	143976734	-	16991	protein_coding	plectin [Source:HGNC Symbol;Acc:HGNC:9069]	-
ENSG00000177674	55.6025	113.545	68.3507	97.5827	122.618	114.578	AGTRAP	1	11736084	11754802	+	2435	protein_coding	angiotensin II receptor associated protein [Source:HGNC Symbol;Acc:HGNC:13539]	-
ENSG00000185825	77.5857	135.099	86.942	95.3594	79.8149	97.0636	BCAP31	X	153700492	153724565	-	3301	protein_coding	B cell receptor associated protein 31 [Source:HGNC Symbol;Acc:HGNC:16695]	-
ENSG00000110651	63.1009	75.5462	77.5597	102.521	126.565	126.342	CD81	11	2376177	2397419	+	7394	protein_coding	CD81 molecule [Source:HGNC Symbol;Acc:HGNC:1701]	-
ENSG00000088247	91.8738	64.2302	83.0346	104.281	92.8293	133.896	KHSRP	19	6413348	6424794	-	4563	protein_coding	KH-type splicing regulatory protein [Source:HGNC Symbol;Acc:HGNC:6316]	-
ENSG00000131653	68.1816	87.8937	71.2696	112.747	114.948	114.283	TRAF7	16	2155698	2178129	+	4489	protein_coding	TNF receptor associated factor 7 [Source:HGNC Symbol;Acc:HGNC:20456]	-
ENSG00000143575	73.4495	178.74	100.394	92.0614	55.6126	68.0492	HAX1	1	154272511	154275875	+	2155	protein_coding	HCLS1 associated protein X-1 [Source:HGNC Symbol;Acc:HGNC:16915]	-
ENSG00000077312	61.9472	67.7402	70.139	127.185	108.992	132.12	SNRPA	19	40750637	40765389	+	2353	protein_coding	small nuclear ribonucleoprotein polypeptide A [Source:HGNC Symbol;Acc:HGNC:11151]	-
ENSG00000171148	61.2745	134.501	79.3123	96.7435	99.8969	96.2938	TADA3	3	9779860	9793011	-	4234	protein_coding	transcriptional adaptor 3 [Source:HGNC Symbol;Acc:HGNC:19422]	-
ENSG00000096080	66.1828	144.572	80.6126	88.8151	88.9261	97.9491	MRPS18A	6	43671303	43687791	-	1284	protein_coding	mitochondrial ribosomal protein S18A [Source:HGNC Symbol;Acc:HGNC:14515]	-
ENSG00000158792	64.6364	88.5947	88.7639	92.7403	111.208	119.945	SPATA2L	16	89696357	89701705	-	2468	protein_coding	spermatogenesis associated 2 like [Source:HGNC Symbol;Acc:HGNC:28393]	-
ENSG00000146066	71.6	98.1156	64.858	123.949	92.6967	113.561	HIGD2A	5	176388751	176389761	+	654	protein_coding	HIG1 hypoxia inducible domain family member 2A [Source:HGNC Symbol;Acc:HGNC:28311]	-
ENSG00000172809	88.6717	112.763	103.637	97.4696	73.1881	89.0222	RPL38	17	74203582	74210655	+	3829	protein_coding	ribosomal protein L38 [Source:HGNC Symbol;Acc:HGNC:10349]	-
ENSG00000185236	66.0934	65.3592	72.3352	116.258	111.093	132.028	RAB11B	19	8389981	8404434	+	2309	protein_coding	RAB11B, member RAS oncogene family [Source:HGNC Symbol;Acc:HGNC:9761]	-
ENSG00000115307	76.0564	125.416	89.4735	91.8636	89.4327	90.3567	AUP1	2	74526645	74529760	-	2455	protein_coding	AUP1 lipid droplet regulating VLDL assembly factor [Source:HGNC Symbol;Acc:HGNC:891]	-
ENSG00000239672	67.7597	147.756	85.6799	95.7204	64.4981	101.042	NME1	17	51153536	51162428	+	3438	protein_coding	NME/NM23 nucleoside diphosphate kinase 1 [Source:HGNC Symbol;Acc:HGNC:7849]	-
ENSG00000164880	51.8282	58.2297	56.2031	118.263	131.029	144.603	INTS1	7	1470277	1504389	-	9084	protein_coding	integrator complex subunit 1 [Source:HGNC Symbol;Acc:HGNC:24555]	-
ENSG00000083444	91.3417	101.878	94.5031	95.3377	77.5015	97.8144	PLOD1	1	11934205	11975538	+	5320	protein_coding	procollagen-lysine,2-oxoglutarate 5-dioxygenase 1 [Source:HGNC Symbol;Acc:HGNC:9081]	-
ENSG00000164889	55.293	68.8146	61.5782	106.552	132.668	131.948	SLC4A2	7	151057210	151076526	+	7570	protein_coding	solute carrier family 4 member 2 [Source:HGNC Symbol;Acc:HGNC:11028]	-
ENSG00000104976	55.2604	83.0643	73.7362	97.5152	129.372	117.814	SNAPC2	19	7920338	7923250	+	1978	protein_coding	small nuclear RNA activating complex polypeptide 2 [Source:HGNC Symbol;Acc:HGNC:11135]	-
ENSG00000160113	76.0143	97.9167	81.1777	99.9879	85.1695	115.649	NR2F6	19	17231883	17245940	-	2676	protein_coding	nuclear receptor subfamily 2 group F member 6 [Source:HGNC Symbol;Acc:HGNC:7977]	RXR-like
ENSG00000127884	72.0102	96.7235	78.464	97.8219	99.646	110.831	ECHS1	10	133362485	133373354	-	1277	protein_coding	enoyl-CoA hydratase, short chain 1 [Source:HGNC Symbol;Acc:HGNC:3151]	-
ENSG00000167862	89.7039	162.704	97.4647	91.9518	34.2155	78.1591	MRPL58	17	75012670	75021261	+	1108	protein_coding	mitochondrial ribosomal protein L58 [Source:HGNC Symbol;Acc:HGNC:5359]	-
ENSG00000159352	100.164	146.856	98.4062	72.5076	62.2691	73.3286	PSMD4	1	151254703	151267479	+	3027	protein_coding	proteasome 26S subunit, non-ATPase 4 [Source:HGNC Symbol;Acc:HGNC:9561]	-
ENSG00000130175	79.4708	77.6364	80.5998	118.148	98.4621	98.5466	PRKCSH	19	11435288	11450968	+	5166	protein_coding	protein kinase C substrate 80K-H [Source:HGNC Symbol;Acc:HGNC:9411]	-
ENSG00000152082	70.6436	126.911	67.5592	112.119	85.4966	89.3666	MZT2B	2	130181737	130190729	+	1815	protein_coding	mitotic spindle organizing protein 2B [Source:HGNC Symbol;Acc:HGNC:25886]	-
ENSG00000149418	82.6472	90.1129	85.3367	100.284	88.141	104.025	ST14	11	130159782	130210362	+	4116	protein_coding	suppression of tumorigenicity 14 [Source:HGNC Symbol;Acc:HGNC:11344]	-
ENSG00000220842	69.5386	88.5065	67.5773	126.256	102.061	93.8551	RPL21P16	10	120354701	120355183	-	483	processed_pseudogene	ribosomal protein L21 pseudogene 16 [Source:HGNC Symbol;Acc:HGNC:31396]	-
ENSG00000130811	72.9564	114.595	77.9168	109.47	80.7059	90.7892	EIF3G	19	10115014	10119918	-	3489	protein_coding	eukaryotic translation initiation factor 3 subunit G [Source:HGNC Symbol;Acc:HGNC:3274]	-
ENSG00000218426	76.3063	171.703	113.312	89.0966	37.7638	57.9956	AL590867.2	6	153282287	153282733	-	447	processed_pseudogene	60S ribosomal protein L27a (RPL27A) pseudogene	-
ENSG00000160957	63.0931	73.0862	73.357	95.2551	115.419	125.161	RECQL4	8	144511288	144517845	-	4236	protein_coding	RecQ like helicase 4 [Source:HGNC Symbol;Acc:HGNC:9949]	-
ENSG00000079616	64.7338	113.503	75.218	92.9688	90.7676	106.072	KIF22	16	29790719	29805385	+	4312	protein_coding	kinesin family member 22 [Source:HGNC Symbol;Acc:HGNC:6391]	-
ENSG00000142230	90.8727	137.708	93.0211	71.6116	64.2939	84.1266	SAE1	19	47113274	47210636	+	3742	protein_coding	SUMO1 activating enzyme subunit 1 [Source:HGNC Symbol;Acc:HGNC:30660]	-
ENSG00000108528	54.9508	86.9341	61.1965	104.424	118.857	114.894	SLC25A11	17	4937130	4940053	-	2471	protein_coding	solute carrier family 25 member 11 [Source:HGNC Symbol;Acc:HGNC:10981]	-
ENSG00000198258	68.629	168.739	84.858	93.5935	49.169	75.7616	UBL5	19	9827892	9830115	+	1931	protein_coding	ubiquitin like 5 [Source:HGNC Symbol;Acc:HGNC:13736]	-
ENSG00000196576	70.3628	73.1039	77.1403	103.888	103.214	112.657	PLXNB2	22	50274979	50307646	-	7276	protein_coding	plexin B2 [Source:HGNC Symbol;Acc:HGNC:9104]	-
ENSG00000160446	56.2993	81.9918	68.954	105.527	112.443	114.949	ZDHHC12	9	128720870	128724127	-	2596	protein_coding	zinc finger DHHC-type containing 12 [Source:HGNC Symbol;Acc:HGNC:19159]	-
ENSG00000238103	45.4276	167.259	73.2597	83.0243	64.7833	105.943	RPL9P7	X	23836742	23837321	-	580	processed_pseudogene	ribosomal protein L9 pseudogene 7 [Source:HGNC Symbol;Acc:HGNC:30335]	-
ENSG00000244716	70.6232	117.065	81.593	102.495	67.9036	99.7321	BX679664.3	1	108992282	108992836	+	555	processed_pseudogene	ribosomal protein L17 (RPL17) pseudogene	-
ENSG00000011009	66.6054	81.297	73.6223	101.588	99.9525	115.55	LYPLA2	1	23791145	23795539	+	2021	protein_coding	lysophospholipase 2 [Source:HGNC Symbol;Acc:HGNC:6738]	-
ENSG00000131462	73.8304	94.2119	78.3062	95.5253	86.3108	110.364	TUBG1	17	42609683	42615238	+	2408	protein_coding	tubulin gamma 1 [Source:HGNC Symbol;Acc:HGNC:12417]	-
ENSG00000172725	62.9529	105.027	78.978	88.7195	110.92	90.7411	CORO1B	11	67435510	67443821	-	5327	protein_coding	coronin 1B [Source:HGNC Symbol;Acc:HGNC:2253]	-
ENSG00000145592	52.5636	124.866	79.9593	85.1536	91.4875	102.753	RPL37	5	40825262	40835222	-	8040	protein_coding	ribosomal protein L37 [Source:HGNC Symbol;Acc:HGNC:10347]	-
ENSG00000163902	99.1014	152.472	98.0608	60.9442	55.5436	69.5525	RPN1	3	128619969	128681075	-	3965	protein_coding	ribophorin I [Source:HGNC Symbol;Acc:HGNC:10381]	-
ENSG00000162430	52.0887	57.29	56.2199	118.416	122.133	128.687	SELENON	1	25800176	25818221	+	4421	protein_coding	selenoprotein N [Source:HGNC Symbol;Acc:HGNC:15999]	-
ENSG00000132589	54.3674	83.5328	64.0801	101.811	110.657	120.102	FLOT2	17	28879335	28897733	-	3390	protein_coding	flotillin 2 [Source:HGNC Symbol;Acc:HGNC:3758]	-
ENSG00000161677	56.861	87.713	65.5986	103.003	114.607	106.625	JOSD2	19	50505998	50511353	-	1514	protein_coding	Josephin domain containing 2 [Source:HGNC Symbol;Acc:HGNC:28853]	-
ENSG00000149923	86.6707	141.363	88.0652	88.3924	55.527	73.7566	PPP4C	16	30075978	30085376	+	2733	protein_coding	protein phosphatase 4 catalytic subunit [Source:HGNC Symbol;Acc:HGNC:9319]	-
ENSG00000072778	67.2609	130.128	80.5442	91.5585	84.238	79.6734	ACADVL	17	7217125	7225266	+	4820	protein_coding	acyl-CoA dehydrogenase very long chain [Source:HGNC Symbol;Acc:HGNC:92]	-
ENSG00000127837	72.0096	94.3048	84.6572	98.4736	83.3	100.657	AAMP	2	218264123	218270257	-	3140	protein_coding	angio associated migratory cell protein [Source:HGNC Symbol;Acc:HGNC:18]	-
ENSG00000174547	66.0141	144.607	73.7738	90.0412	69.135	86.9258	MRPL11	11	66435075	66466738	-	2539	protein_coding	mitochondrial ribosomal protein L11 [Source:HGNC Symbol;Acc:HGNC:14042]	-
ENSG00000174917	52.73	126.359	65.7019	88.7867	88.7799	104.379	MICOS13	19	5678421	5680896	-	1854	protein_coding	mitochondrial contact site and cristae organizing system subunit 13 [Source:HGNC Symbol;Acc:HGNC:33702]	-
ENSG00000135486	90.6877	58.8254	80.4849	108.686	90.9652	96.8776	HNRNPA1	12	54280193	54287088	+	5093	protein_coding	heterogeneous nuclear ribonucleoprotein A1 [Source:HGNC Symbol;Acc:HGNC:5031]	-
ENSG00000205542	109.181	130.541	115.687	73.3127	54.3687	43.1169	TMSB4X	X	12975110	12977227	+	1703	protein_coding	thymosin beta 4 X-linked [Source:HGNC Symbol;Acc:HGNC:11881]	-
ENSG00000164919	53.0255	143.872	81.9705	85.8575	75.1263	85.9536	COX6C	8	99873200	99893707	-	2712	protein_coding	cytochrome c oxidase subunit 6C [Source:HGNC Symbol;Acc:HGNC:2285]	-
ENSG00000106682	105.44	86.8963	90.3076	81.9986	72.8825	88.2015	EIF4H	7	74174245	74197101	+	3191	protein_coding	eukaryotic translation initiation factor 4H [Source:HGNC Symbol;Acc:HGNC:12741]	-
ENSG00000132475	100.836	160.988	103.223	59.5511	43.2265	56.518	H3F3B	17	75776434	75785893	-	6134	protein_coding	H3 histone family member 3B [Source:HGNC Symbol;Acc:HGNC:4765]	-
ENSG00000167792	49.3937	95.14	63.2356	105.794	106.839	103.76	NDUFV1	11	67605653	67612554	+	5057	protein_coding	NADH:ubiquinone oxidoreductase core subunit V1 [Source:HGNC Symbol;Acc:HGNC:7716]	-
ENSG00000164967	60.3802	139.344	68.5315	95.0211	69.7418	90.7893	RPP25L	9	34610486	34612104	-	1092	protein_coding	ribonuclease P/MRP subunit p25 like [Source:HGNC Symbol;Acc:HGNC:19909]	-
ENSG00000141526	76.2965	103.523	75.9078	79.3084	78.6382	109.822	SLC16A3	17	82228397	82261129	+	8995	protein_coding	solute carrier family 16 member 3 [Source:HGNC Symbol;Acc:HGNC:10924]	-
ENSG00000109321	145.33	83.6474	119.94	75.5045	65.0294	32.7283	AREG	4	74445136	74455005	+	1642	protein_coding	amphiregulin [Source:HGNC Symbol;Acc:HGNC:651]	-
ENSG00000099797	61.2377	86.477	72.5038	98.7655	105.85	96.9079	TECR	19	14517085	14565980	+	5899	protein_coding	trans-2,3-enoyl-CoA reductase [Source:HGNC Symbol;Acc:HGNC:4551]	-
ENSG00000126067	71.4832	84.3379	82.5725	93.8735	82.5239	105.097	PSMB2	1	35599541	35641526	-	4528	protein_coding	proteasome subunit beta 2 [Source:HGNC Symbol;Acc:HGNC:9539]	-
ENSG00000130066	90.7775	151.91	120.746	69.0963	49.7276	36.491	SAT1	X	23783173	23786226	+	2498	protein_coding	spermidine/spermine N1-acetyltransferase 1 [Source:HGNC Symbol;Acc:HGNC:10540]	-
ENSG00000131174	40.683	107.773	57.0122	86.4761	119.522	107.147	COX7B	X	77899440	77907376	+	3025	protein_coding	cytochrome c oxidase subunit 7B [Source:HGNC Symbol;Acc:HGNC:2291]	-
ENSG00000198858	61.6669	93.8935	78.7837	95.2785	98.8104	89.8262	R3HDM4	19	896503	913245	-	2957	protein_coding	R3H domain containing 4 [Source:HGNC Symbol;Acc:HGNC:28270]	-
ENSG00000117419	59.2697	101.519	70.9792	90.9139	94.3612	101.06	ERI3	1	44221070	44355260	-	2785	protein_coding	ERI1 exoribonuclease family member 3 [Source:HGNC Symbol;Acc:HGNC:17276]	-
ENSG00000025770	54.6724	86.1433	74.4199	98.3535	106.54	97.8301	NCAPH2	22	50508224	50524780	+	4459	protein_coding	non-SMC condensin II complex subunit H2 [Source:HGNC Symbol;Acc:HGNC:25071]	-
ENSG00000214222	60.14	64.7085	60.4561	82.8477	106.841	137.232	TUBBP2	13	41384773	41385183	-	411	processed_pseudogene	tubulin beta pseudogene 2 [Source:HGNC Symbol;Acc:HGNC:12415]	-
ENSG00000099194	112.916	61.0001	77.5498	76.6616	85.9126	98.1444	SCD	10	100347233	100364826	+	5245	protein_coding	stearoyl-CoA desaturase [Source:HGNC Symbol;Acc:HGNC:10571]	-
ENSG00000166145	65.7518	73.8254	75.2566	103.149	97.4056	96.3344	SPINT1	15	40844018	40858207	+	3542	protein_coding	serine peptidase inhibitor, Kunitz type 1 [Source:HGNC Symbol;Acc:HGNC:11246]	-
ENSG00000004779	81.1431	135.54	101.579	72.3668	51.0454	70.0197	NDUFAB1	16	23581014	23596316	-	1548	protein_coding	NADH:ubiquinone oxidoreductase subunit AB1 [Source:HGNC Symbol;Acc:HGNC:7694]	-
ENSG00000143878	115.144	123.104	106.9	58.1093	46.7224	60.8591	RHOB	2	20447074	20449440	+	2367	protein_coding	ras homolog family member B [Source:HGNC Symbol;Acc:HGNC:668]	-
ENSG00000161513	44.9947	84.3853	54.517	105.602	118.38	102.79	FDXR	17	74862497	74873031	-	3599	protein_coding	ferredoxin reductase [Source:HGNC Symbol;Acc:HGNC:3642]	-
ENSG00000144485	57.5746	91.1639	75.7705	87.1643	93.8224	105.169	HES6	2	238238267	238240662	-	1954	protein_coding	hes family bHLH transcription factor 6 [Source:HGNC Symbol;Acc:HGNC:18254]	bHLH
ENSG00000256393	63.5455	113.273	80.1105	108.49	66.8659	77.2511	RPL41P5	12	93083598	93083675	-	78	processed_pseudogene	ribosomal protein L41 pseudogene 5 [Source:HGNC Symbol;Acc:HGNC:10355]	-
ENSG00000164111	114.248	132.755	119.556	47.8734	43.9637	50.5905	ANXA5	4	121667946	121696995	-	2925	protein_coding	annexin A5 [Source:HGNC Symbol;Acc:HGNC:543]	-
ENSG00000103187	71.3335	81.8404	76.4489	94.5771	84.4078	99.8278	COTL1	16	84565596	84618078	-	6761	protein_coding	coactosin like F-actin binding protein 1 [Source:HGNC Symbol;Acc:HGNC:18304]	-
ENSG00000132341	91.7828	126.917	110.278	66.1676	52.3319	60.817	RAN	12	130872037	130877678	+	4667	protein_coding	RAN, member RAS oncogene family [Source:HGNC Symbol;Acc:HGNC:9846]	-
ENSG00000187051	56.7212	131.91	66.1198	85.0078	73.7354	93.7064	RPS19BP1	22	39529093	39532761	-	3669	protein_coding	ribosomal protein S19 binding protein 1 [Source:HGNC Symbol;Acc:HGNC:28749]	-
ENSG00000104897	53.0625	50.9244	56.5709	113.306	108.001	123.706	SF3A2	19	2236824	2248655	+	2790	protein_coding	splicing factor 3a subunit 2 [Source:HGNC Symbol;Acc:HGNC:10766]	-
ENSG00000117411	61.6906	82.053	71.3694	85.9804	94.6182	107.939	B4GALT2	1	43978943	43991170	+	3772	protein_coding	beta-1,4-galactosyltransferase 2 [Source:HGNC Symbol;Acc:HGNC:925]	-
ENSG00000101400	41.5756	76.861	53.5184	89.9871	132.253	107.82	SNTA1	20	33407955	33443892	-	2342	protein_coding	syntrophin alpha 1 [Source:HGNC Symbol;Acc:HGNC:11167]	-
ENSG00000147140	81.7194	61.0823	80.7784	93.5577	75.0821	109.758	NONO	X	71283192	71301168	+	5292	protein_coding	non-POU domain containing octamer binding [Source:HGNC Symbol;Acc:HGNC:7871]	-
ENSG00000214182	86.9383	98.9228	94.2639	79.3558	64.3822	77.4212	PTMAP5	13	81689911	81691072	+	1162	transcribed_processed_pseudogene	prothymosin alpha pseudogene 5 [Source:HGNC Symbol;Acc:HGNC:9628]	-
ENSG00000164978	78.468	166.098	93.5186	64.5943	33.45	64.9064	NUDT2	9	34329506	34343711	+	1073	protein_coding	nudix hydrolase 2 [Source:HGNC Symbol;Acc:HGNC:8049]	-
ENSG00000198937	57.8067	135.273	71.1998	83.5984	58.0419	93.4608	CCDC167	6	37482938	37499893	-	572	protein_coding	coiled-coil domain containing 167 [Source:HGNC Symbol;Acc:HGNC:21239]	-
ENSG00000177469	87.7974	93.8204	93.4668	80.0659	62.4903	79.8191	CAVIN1	17	42402449	42423256	-	3570	protein_coding	caveolae associated protein 1 [Source:HGNC Symbol;Acc:HGNC:9688]	-
ENSG00000154518	63.6402	123.707	69.9351	89.3889	57.2474	93.3063	ATP5MC3	2	175176258	175184607	-	6780	protein_coding	ATP synthase membrane subunit c locus 3 [Source:HGNC Symbol;Acc:HGNC:843]	-
ENSG00000157992	62.9865	126.521	78.8577	87.0263	63.316	78.0552	KRTCAP3	2	27442366	27446481	+	1403	protein_coding	keratinocyte associated protein 3 [Source:HGNC Symbol;Acc:HGNC:28943]	-
ENSG00000102890	50.8572	94.0978	67.9462	89.5648	107.85	85.384	ELMO3	16	67199111	67204029	+	2575	protein_coding	engulfment and cell motility 3 [Source:HGNC Symbol;Acc:HGNC:17289]	-
ENSG00000165280	92.7214	87.2257	85.3125	60.1321	70.7418	98.7834	VCP	9	35056064	35072627	-	4816	protein_coding	valosin containing protein [Source:HGNC Symbol;Acc:HGNC:12666]	-
ENSG00000175573	74.5182	104.853	93.0994	75.595	72.2406	71.6274	C11orf68	11	65916810	65919062	-	1704	protein_coding	chromosome 11 open reading frame 68 [Source:HGNC Symbol;Acc:HGNC:28801]	-
ENSG00000215845	63.4198	165.891	77.9964	73.6129	49.5687	60.8166	TSTD1	1	161037631	161038977	-	1197	protein_coding	thiosulfate sulfurtransferase like domain containing 1 [Source:HGNC Symbol;Acc:HGNC:35410]	-
ENSG00000136270	50.0793	79.1568	64.5061	76.1878	106.219	115.125	TBRG4	7	45100100	45112047	-	5803	protein_coding	transforming growth factor beta regulator 4 [Source:HGNC Symbol;Acc:HGNC:17443]	-
ENSG00000166851	64.6971	70.2528	66.7333	87.5345	89.9182	111.5	PLK1	16	23677656	23690367	+	4760	protein_coding	polo like kinase 1 [Source:HGNC Symbol;Acc:HGNC:9077]	-
ENSG00000175221	52.7828	60.4765	58.2777	89.5739	110.356	119.004	MED16	19	867630	893218	-	4222	protein_coding	mediator complex subunit 16 [Source:HGNC Symbol;Acc:HGNC:17556]	-
ENSG00000124702	61.3738	113.999	69.6901	79.4018	77.7469	87.5899	KLHDC3	6	43014103	43021298	+	2019	protein_coding	kelch domain containing 3 [Source:HGNC Symbol;Acc:HGNC:20704]	-
ENSG00000142676	84.7169	129.086	100.69	76.7333	54.4149	43.8729	RPL11	1	23691742	23696835	+	2659	protein_coding	ribosomal protein L11 [Source:HGNC Symbol;Acc:HGNC:10301]	-
ENSG00000136271	56.4964	91.4614	67.1702	81.6889	84.6041	106.751	DDX56	7	44565417	44575051	-	4068	protein_coding	DEAD-box helicase 56 [Source:HGNC Symbol;Acc:HGNC:18193]	-
ENSG00000189043	55.1741	132.927	82.6253	72.0506	67.4237	77.4136	NDUFA4	7	10931943	10940153	-	3461	protein_coding	NDUFA4 mitochondrial complex associated [Source:HGNC Symbol;Acc:HGNC:7687]	-
ENSG00000116670	51.6798	113.007	62.5879	84.9609	89.0312	86.2532	MAD2L2	1	11674480	11691650	-	3324	protein_coding	mitotic arrest deficient 2 like 2 [Source:HGNC Symbol;Acc:HGNC:6764]	-
ENSG00000172009	54.3115	83.0883	61.0216	86.048	103.313	98.918	THOP1	19	2785503	2815807	+	7421	protein_coding	thimet oligopeptidase 1 [Source:HGNC Symbol;Acc:HGNC:11793]	-
ENSG00000065518	68.6924	128.852	77.1556	72.7781	60.8914	78.0158	NDUFB4	3	120596328	120602507	+	1877	protein_coding	NADH:ubiquinone oxidoreductase subunit B4 [Source:HGNC Symbol;Acc:HGNC:7699]	-
ENSG00000160410	54.84	69.8266	61.9462	91.2489	107.786	99.1132	SHKBP1	19	40576853	40591399	+	3934	protein_coding	SH3KBP1 binding protein 1 [Source:HGNC Symbol;Acc:HGNC:19214]	-
ENSG00000160211	52.5598	61.5461	57.4206	99.9917	107.846	105.019	G6PD	X	154531391	154547572	-	3586	protein_coding	glucose-6-phosphate dehydrogenase [Source:HGNC Symbol;Acc:HGNC:4057]	-
ENSG00000244187	46.9103	101.153	49.6724	101.14	96.3083	89.0852	TMEM141	9	136791344	136793317	+	1514	protein_coding	transmembrane protein 141 [Source:HGNC Symbol;Acc:HGNC:28211]	-
ENSG00000087077	64.6302	88.3367	76.9398	84.7596	79.9369	88.3702	TRIP6	7	100867387	100873454	+	2553	protein_coding	thyroid hormone receptor interactor 6 [Source:HGNC Symbol;Acc:HGNC:12311]	-
ENSG00000198055	52.4347	81.3391	64.2671	89.049	93.0866	102.211	GRK6	5	177403204	177442901	+	4357	protein_coding	G protein-coupled receptor kinase 6 [Source:HGNC Symbol;Acc:HGNC:4545]	-
ENSG00000155366	73.6534	109.74	79.7184	89.803	62.3046	66.4991	RHOC	1	112701106	112707434	-	4028	protein_coding	ras homolog family member C [Source:HGNC Symbol;Acc:HGNC:669]	-
ENSG00000130309	73.6712	93.1691	78.1561	78.2084	72.7144	85.1481	COLGALT1	19	17555649	17583162	+	4845	protein_coding	collagen beta(1-O)galactosyltransferase 1 [Source:HGNC Symbol;Acc:HGNC:26182]	-
ENSG00000178773	47.3458	76.4921	59.9789	79.701	115.261	98.2238	CPNE7	16	89575758	89597246	+	3058	protein_coding	copine 7 [Source:HGNC Symbol;Acc:HGNC:2320]	-
ENSG00000176720	46.6502	72.6619	57.6585	79.7156	108.437	111.267	BOK	2	241551424	241574131	+	2680	protein_coding	BCL2 family apoptosis regulator BOK [Source:HGNC Symbol;Acc:HGNC:1087]	-
ENSG00000117394	85.8199	86.7396	85.2493	72.1489	62.8499	82.7261	SLC2A1	1	42925375	42958868	-	4416	protein_coding	solute carrier family 2 member 1 [Source:HGNC Symbol;Acc:HGNC:11005]	-
ENSG00000134686	72.1263	101.013	81.0788	80.9976	69.7772	68.9946	PHC2	1	33323623	33431052	-	4975	protein_coding	polyhomeotic homolog 2 [Source:HGNC Symbol;Acc:HGNC:3183]	-
ENSG00000168061	53.1091	69.6035	59.0761	91.114	88.5207	110.356	SAC3D1	11	65040901	65044828	+	1772	protein_coding	SAC3 domain containing 1 [Source:HGNC Symbol;Acc:HGNC:30179]	-
ENSG00000164611	60.2645	122.73	73.7365	75.6619	61.675	77.4794	PTTG1	5	160421855	160428739	+	1975	protein_coding	PTTG1 regulator of sister chromatid separation, securin [Source:HGNC Symbol;Acc:HGNC:9690]	-
ENSG00000075415	79.0516	89.8375	81.1157	80.4326	60.3552	79.8154	SLC25A3	12	98593591	98606379	+	8896	protein_coding	solute carrier family 25 member 3 [Source:HGNC Symbol;Acc:HGNC:10989]	-
ENSG00000126453	63.7168	99.475	70.4612	82.1929	69.5193	84.7356	BCL2L12	19	49665142	49673916	+	2216	protein_coding	BCL2 like 12 [Source:HGNC Symbol;Acc:HGNC:13787]	-
ENSG00000214078	61.1326	82.0476	72.5759	94.6725	79.785	78.59	CPNE1	20	35626031	35664956	-	3608	protein_coding	copine 1 [Source:HGNC Symbol;Acc:HGNC:2314]	-
ENSG00000138085	62.2783	128.454	74.0593	71.7843	53.7756	77.0749	ATRAID	2	27212027	27217178	+	2019	protein_coding	all-trans retinoic acid induced differentiation factor [Source:HGNC Symbol;Acc:HGNC:24090]	-
ENSG00000154146	40.4856	52.6056	53.7561	102.817	111.053	105.069	NRGN	11	124739942	124747210	+	1213	protein_coding	neurogranin [Source:HGNC Symbol;Acc:HGNC:8000]	-
ENSG00000254999	76.6734	115.631	87.0013	77.0302	52.8137	55.6864	BRK1	3	10115675	10127190	+	1150	protein_coding	BRICK1 subunit of SCAR/WAVE actin nucleating complex [Source:HGNC Symbol;Acc:HGNC:23057]	-
ENSG00000103145	43.873	64.5209	54.4295	104.42	98.4647	99.1079	HCFC1R1	16	3022620	3024286	-	1433	protein_coding	host cell factor C1 regulator 1 [Source:HGNC Symbol;Acc:HGNC:21198]	-
ENSG00000114738	57.988	92.8018	68.6311	75.4119	78.7284	90.1091	MAPKAPK3	3	50611520	50649291	+	3915	protein_coding	MAPK activated protein kinase 3 [Source:HGNC Symbol;Acc:HGNC:6888]	-
ENSG00000010278	85.5895	154.407	106.89	47.0366	29.4611	39.7175	CD9	12	6199715	6238271	+	4165	protein_coding	CD9 molecule [Source:HGNC Symbol;Acc:HGNC:1709]	-
ENSG00000103254	39.3967	85.7449	54.4428	75.9069	105.739	101.543	ANTKMT	16	720581	722590	+	1912	protein_coding	adenine nucleotide translocase lysine methyltransferase [Source:HGNC Symbol;Acc:HGNC:14152]	-
ENSG00000122140	63.6826	81.3859	75.1243	73.9475	72.5822	94.9175	MRPS2	9	135499984	135504673	+	2464	protein_coding	mitochondrial ribosomal protein S2 [Source:HGNC Symbol;Acc:HGNC:14495]	-
ENSG00000063660	64.0478	65.2443	69.2187	88.6618	77.5006	94.838	GPC1	2	240435663	240468076	+	6522	protein_coding	glypican 1 [Source:HGNC Symbol;Acc:HGNC:4449]	-
ENSG00000177105	46.2609	73.2545	61.721	79.9585	89.0343	109.242	RHOG	11	3826978	3840959	-	1758	protein_coding	ras homolog family member G [Source:HGNC Symbol;Acc:HGNC:672]	-
ENSG00000125656	55.0962	85.5049	55.8375	89.5474	85.559	87.8639	CLPP	19	6361531	6370242	+	3531	protein_coding	caseinolytic mitochondrial matrix peptidase proteolytic subunit [Source:HGNC Symbol;Acc:HGNC:2084]	-
ENSG00000108523	55.7821	88.0097	61.2967	91.0975	79.237	83.5979	RNF167	17	4940008	4945222	+	2744	protein_coding	ring finger protein 167 [Source:HGNC Symbol;Acc:HGNC:24544]	-
ENSG00000147684	58.5626	115.35	70.8455	83.5827	58.3074	71.7543	NDUFB9	8	124539101	124580648	+	4106	protein_coding	NADH:ubiquinone oxidoreductase subunit B9 [Source:HGNC Symbol;Acc:HGNC:7704]	-
ENSG00000214706	49.8445	76.6233	60.0859	76.9126	93.8059	100.228	IFRD2	3	50287732	50292918	-	3712	protein_coding	interferon related developmental regulator 2 [Source:HGNC Symbol;Acc:HGNC:5457]	-
ENSG00000197451	76.888	68.0508	66.9532	90.3718	63.4156	91.4351	HNRNPAB	5	178204533	178211163	+	2118	protein_coding	heterogeneous nuclear ribonucleoprotein A/B [Source:HGNC Symbol;Acc:HGNC:5034]	-
ENSG00000182173	49.5162	77.1124	63.1978	71.677	96.0154	98.3153	TSEN54	17	75516060	75524735	+	3435	protein_coding	tRNA splicing endonuclease subunit 54 [Source:HGNC Symbol;Acc:HGNC:27561]	-
ENSG00000174744	46.4878	83.6367	58.3076	82.2009	80.6862	103.62	BRMS1	11	66337333	66345125	-	2514	protein_coding	BRMS1 transcriptional repressor and anoikis regulator [Source:HGNC Symbol;Acc:HGNC:17262]	-
ENSG00000173272	50.7249	103.835	60.1406	90.1252	70.1289	79.9168	MZT2A	2	131464900	131492743	-	4068	protein_coding	mitotic spindle organizing protein 2A [Source:HGNC Symbol;Acc:HGNC:33187]	-
ENSG00000107175	73.8337	147.651	88.3057	57.5897	40.4744	46.4528	CREB3	9	35732598	35736999	+	1635	protein_coding	cAMP responsive element binding protein 3 [Source:HGNC Symbol;Acc:HGNC:2347]	TF_bZIP
ENSG00000165629	64.9917	87.1962	83.5464	93.0296	50.4195	74.2239	ATP5F1C	10	7788147	7807815	+	2308	protein_coding	ATP synthase F1 subunit gamma [Source:HGNC Symbol;Acc:HGNC:833]	-
ENSG00000163344	52.5908	106.792	67.277	77.2145	70.745	78.386	PMVK	1	154924740	154936719	-	1002	protein_coding	phosphomevalonate kinase [Source:HGNC Symbol;Acc:HGNC:9141]	-
ENSG00000142634	61.3315	74.7353	69.0165	76.0923	65.9738	105.844	EFHD2	1	15409888	15430339	+	2534	protein_coding	EF-hand domain family member D2 [Source:HGNC Symbol;Acc:HGNC:28670]	-
ENSG00000166228	59.5142	88.286	59.5483	87.7661	69.629	87.3928	PCBD1	10	70882280	70888565	-	1395	protein_coding	pterin-4 alpha-carbinolamine dehydratase 1 [Source:HGNC Symbol;Acc:HGNC:8646]	-
novel.794	81.6485	106.614	133.199	51.5099	36.4953	42.4037	-	CHR_HSCHR6_MHC_QBL_CTG1	31258582	31347362	-	3227	-	- && Q9TNN7.1 RecName: Full=HLA class I histocompatibility antigen, Cw-5 alpha chain; AltName: Full=MHC class I antigen Cw*5; Flags: Precursor && PF06623:MHC_I C-terminus	-
ENSG00000162191	59.2678	113.637	74.9358	80.3168	58.4067	65.1394	UBXN1	11	62676498	62679117	-	2532	protein_coding	UBX domain protein 1 [Source:HGNC Symbol;Acc:HGNC:18402]	-
ENSG00000167645	47.1286	94.1397	55.6602	82.1483	90.1833	82.1257	YIF1B	19	38303558	38317273	-	4723	protein_coding	Yip1 interacting factor homolog B, membrane trafficking protein [Source:HGNC Symbol;Acc:HGNC:30511]	-
ENSG00000159111	57.8275	68.15	67.1992	84.6596	86.2568	86.8795	MRPL10	17	47823272	47831541	-	2771	protein_coding	mitochondrial ribosomal protein L10 [Source:HGNC Symbol;Acc:HGNC:14055]	-
ENSG00000107281	49.0332	57.3862	64.297	91.1606	98.8429	90.1313	NPDC1	9	137039463	137046179	-	2720	protein_coding	neural proliferation, differentiation and control 1 [Source:HGNC Symbol;Acc:HGNC:7899]	-
ENSG00000129255	38.5162	93.83	48.6662	76.8366	97.9288	94.8965	MPDU1	17	7583529	7592789	+	3290	protein_coding	mannose-P-dolichol utilization defect 1 [Source:HGNC Symbol;Acc:HGNC:7207]	-
ENSG00000213741	37.7992	129.123	58.7508	54.7722	88.1404	81.9856	RPS29	14	49570984	49599164	-	9845	protein_coding	ribosomal protein S29 [Source:HGNC Symbol;Acc:HGNC:10419]	-
ENSG00000135114	106.996	196.153	140.714	2.71163	1.22782	2.21132	OASL	12	121019111	121039242	-	3517	protein_coding	2'-5'-oligoadenylate synthetase like [Source:HGNC Symbol;Acc:HGNC:8090]	-
ENSG00000140319	83.0595	120.68	111.365	67.2918	33.013	34.2281	SRP14	15	40035690	40039181	-	2047	protein_coding	signal recognition particle 14 [Source:HGNC Symbol;Acc:HGNC:11299]	-
ENSG00000179262	66.3188	62.5105	65.7203	94.3728	74.0041	86.3227	RAD23A	19	12945855	12953642	+	2547	protein_coding	RAD23 homolog A, nucleotide excision repair protein [Source:HGNC Symbol;Acc:HGNC:9812]	-
ENSG00000167508	64.167	85.1778	67.4351	63.8431	78.4326	87.3101	MVD	16	88651935	88663161	-	4717	protein_coding	mevalonate diphosphate decarboxylase [Source:HGNC Symbol;Acc:HGNC:7529]	-
ENSG00000119383	44.24	62.1736	49.2659	87.2944	99.0992	104.063	PTPA	9	129110950	129148946	+	5624	protein_coding	protein phosphatase 2 phosphatase activator [Source:HGNC Symbol;Acc:HGNC:9308]	-
ENSG00000204237	45.041	101.74	59.8214	79.5433	76.2352	83.027	OXLD1	17	81665036	81666635	-	1600	protein_coding	oxidoreductase like domain containing 1 [Source:HGNC Symbol;Acc:HGNC:27901]	-
ENSG00000141985	65.4479	77.9597	67.1095	84.3653	70.7824	79.7238	SH3GL1	19	4360370	4400547	-	3685	protein_coding	SH3 domain containing GRB2 like 1, endophilin A2 [Source:HGNC Symbol;Acc:HGNC:10830]	-
ENSG00000034152	69.9342	87.1179	85.3142	68.8863	59.5722	74.0368	MAP2K3	17	21284672	21315232	+	3775	protein_coding	mitogen-activated protein kinase kinase 3 [Source:HGNC Symbol;Acc:HGNC:6843]	-
ENSG00000072310	60.17	63.3045	64.0955	90.6582	79.0224	87.5578	SREBF1	17	17810399	17837011	-	8243	protein_coding	sterol regulatory element binding transcription factor 1 [Source:HGNC Symbol;Acc:HGNC:11289]	bHLH
ENSG00000090273	74.4234	76.3664	71.2417	78.9985	59.3892	82.9069	NUDC	1	26900238	26946871	+	2848	protein_coding	nuclear distribution C, dynein complex regulator [Source:HGNC Symbol;Acc:HGNC:8045]	-
ENSG00000100345	86.8196	61.5668	82.9103	78.8533	54.656	78.3449	MYH9	22	36281277	36388067	-	9012	protein_coding	myosin heavy chain 9 [Source:HGNC Symbol;Acc:HGNC:7579]	-
ENSG00000116685	59.7714	68.8995	67.5533	73.2195	73.3447	100.239	KIAA2013	1	11919591	11926428	-	3281	protein_coding	KIAA2013 [Source:HGNC Symbol;Acc:HGNC:28513]	-
ENSG00000170515	77.1865	86.5034	77.7227	65.8098	48.4992	86.5635	PA2G4	12	56104537	56113910	+	3580	protein_coding	proliferation-associated 2G4 [Source:HGNC Symbol;Acc:HGNC:8550]	-
ENSG00000053372	66.7487	123.603	73.3119	59.1465	47.6557	71.0244	MRTO4	1	19251805	19260128	+	2556	protein_coding	MRT4 homolog, ribosome maturation factor [Source:HGNC Symbol;Acc:HGNC:18477]	-
ENSG00000115758	91.7162	71.8506	78.4386	60.6875	59.3161	79.3534	ODC1	2	10439968	10448327	-	2791	protein_coding	ornithine decarboxylase 1 [Source:HGNC Symbol;Acc:HGNC:8109]	-
ENSG00000142657	71.9098	87.2106	72.8294	69.9211	58.605	79.9451	PGD	1	10398592	10420511	+	3333	protein_coding	phosphogluconate dehydrogenase [Source:HGNC Symbol;Acc:HGNC:8891]	-
ENSG00000109107	51.1355	74.3486	58.3434	70.0146	87.0201	98.8742	ALDOC	17	28573115	28576948	-	2612	protein_coding	aldolase, fructose-bisphosphate C [Source:HGNC Symbol;Acc:HGNC:418]	-
ENSG00000170627	63.2282	117.745	96.2021	63.595	43.4162	55.3802	GTSF1	12	54455950	54473602	-	2524	protein_coding	gametocyte specific factor 1 [Source:HGNC Symbol;Acc:HGNC:26565]	-
ENSG00000182087	58.0666	62.9435	65.8172	81.5057	83.4886	87.5681	TMEM259	19	1009648	1021179	-	4031	protein_coding	transmembrane protein 259 [Source:HGNC Symbol;Acc:HGNC:17039]	-
ENSG00000172927	56.7936	89.8887	72.1202	70.1359	71.7365	76.5348	MYEOV	11	69294151	69367726	+	3747	protein_coding	myeloma overexpressed [Source:HGNC Symbol;Acc:HGNC:7563]	-
ENSG00000227615	58.8431	147.848	97.0964	48.1401	37.9496	47.0612	AP001324.1	11	74745716	74746114	-	399	processed_pseudogene	ribosomal protein S12 (RPS12) pseudogene	-
ENSG00000149792	67.6317	121.496	67.9042	58.7001	49.3623	71.6801	MRPL49	11	65122183	65127371	+	3080	protein_coding	mitochondrial ribosomal protein L49 [Source:HGNC Symbol;Acc:HGNC:1176]	-
ENSG00000107984	70.3859	88.442	78.8752	68.9144	69.3628	59.7177	DKK1	10	52314281	52318042	+	2221	protein_coding	dickkopf WNT signaling pathway inhibitor 1 [Source:HGNC Symbol;Acc:HGNC:2891]	-
ENSG00000178999	69.8159	83.3517	72.4635	74.9825	58.0831	76.4118	AURKB	17	8204733	8210600	-	2241	protein_coding	aurora kinase B [Source:HGNC Symbol;Acc:HGNC:11390]	-
ENSG00000080824	43.9176	51.0509	63.6657	51.1894	148.239	76.9139	HSP90AA1	14	102080738	102139699	-	5248	protein_coding	heat shock protein 90 alpha family class A member 1 [Source:HGNC Symbol;Acc:HGNC:5253]	-
ENSG00000168268	39.465	45.7665	40.2262	88.5444	104.379	116.42	NT5DC2	3	52524385	52535054	-	4799	protein_coding	5'-nucleotidase domain containing 2 [Source:HGNC Symbol;Acc:HGNC:25717]	-
ENSG00000077150	76.8668	87.3903	99.0104	57.5295	54.13	58.8433	NFKB2	10	102394110	102402524	+	4714	protein_coding	nuclear factor kappa B subunit 2 [Source:HGNC Symbol;Acc:HGNC:7795]	RHD
ENSG00000112651	54.6135	87.3957	58.6142	79.6275	72.9751	80.0373	MRPL2	6	43054029	43059438	-	2171	protein_coding	mitochondrial ribosomal protein L2 [Source:HGNC Symbol;Acc:HGNC:14056]	-
ENSG00000130204	55.3177	67.3916	56.8353	80.202	74.8473	98.2462	TOMM40	19	44890569	44903689	+	3610	protein_coding	translocase of outer mitochondrial membrane 40 [Source:HGNC Symbol;Acc:HGNC:18001]	-
ENSG00000024422	60.8405	64.2643	63.9894	75.6517	77.3668	89.7684	EHD2	19	47713422	47743134	+	3844	protein_coding	EH domain containing 2 [Source:HGNC Symbol;Acc:HGNC:3243]	-
ENSG00000111481	66.0878	118.231	70.2317	59.2867	49.204	68.2495	COPZ1	12	54301202	54351846	+	3898	protein_coding	coatomer protein complex subunit zeta 1 [Source:HGNC Symbol;Acc:HGNC:2243]	-
ENSG00000132646	89.4827	58.0128	81.4776	67.2084	69.192	64.6216	PCNA	20	5114953	5126626	-	1403	protein_coding	proliferating cell nuclear antigen [Source:HGNC Symbol;Acc:HGNC:8729]	-
ENSG00000165502	84.4165	82.7766	85.3666	87.726	49.2783	39.9039	RPL36AL	14	49618530	49620626	-	676	protein_coding	ribosomal protein L36a like [Source:HGNC Symbol;Acc:HGNC:10346]	-
ENSG00000100243	50.5024	45.739	50.9532	89.7173	85.8581	105.889	CYB5R3	22	42617840	42649392	-	5797	protein_coding	cytochrome b5 reductase 3 [Source:HGNC Symbol;Acc:HGNC:2873]	-
ENSG00000143314	59.2924	101.198	59.8514	99.6908	40.0343	68.5768	MRPL24	1	156737303	156741590	-	1695	protein_coding	mitochondrial ribosomal protein L24 [Source:HGNC Symbol;Acc:HGNC:14037]	-
ENSG00000165644	36.779	87.8424	46.0035	75.6788	98.0831	83.2848	COMTD1	10	75233641	75236030	-	1908	protein_coding	catechol-O-methyltransferase domain containing 1 [Source:HGNC Symbol;Acc:HGNC:26309]	-
ENSG00000233966	54.1044	99.7843	55.9316	64.8516	75.5292	77.2914	UBE2SP1	17	15704232	15704900	-	669	processed_pseudogene	ubiquitin conjugating enzyme E2 S pseudogene 1 [Source:HGNC Symbol;Acc:HGNC:30864]	-
ENSG00000100304	52.1404	59.0145	51.728	80.2207	81.5802	100.967	TTLL12	22	43166622	43187134	-	4623	protein_coding	tubulin tyrosine ligase like 12 [Source:HGNC Symbol;Acc:HGNC:28974]	-
ENSG00000101150	70.6086	117.632	72.3073	51.608	47.1683	65.8408	TPD52L2	20	63865228	63891545	+	4694	protein_coding	TPD52 like 2 [Source:HGNC Symbol;Acc:HGNC:12007]	-
novel.359	50.9445	138.075	84.404	39.9119	46.923	64.5211	-	CHR_HG2217_PATCH	119015659	119018396	-	594	-	- && Q6Q311.1 RecName: Full=40S ribosomal protein S25 >P62853.1 RecName: Full=40S ribosomal protein S25 >P62851.1 RecName: Full=40S ribosomal protein S25 >P62852.1 RecName: Full=40S ribosomal protein S25 >Q56JX5.1 RecName: Full=40S ribosomal protein S25 && PF03297:S25 ribosomal protein	-
ENSG00000117308	55.9834	116.527	69.8701	63.6115	56.5774	61.3135	GALE	1	23795599	23800781	-	3955	protein_coding	UDP-galactose-4-epimerase [Source:HGNC Symbol;Acc:HGNC:4116]	-
ENSG00000006016	42.7971	52.5187	55.872	93.5539	90.482	88.6261	CRLF1	19	18572220	18607741	-	2967	protein_coding	cytokine receptor like factor 1 [Source:HGNC Symbol;Acc:HGNC:2364]	-
ENSG00000089685	78.1588	114.861	77.1937	55.3128	37.9411	59.468	BIRC5	17	78214186	78225636	+	3815	protein_coding	baculoviral IAP repeat containing 5 [Source:HGNC Symbol;Acc:HGNC:593]	-
ENSG00000127418	59.1797	67.9927	71.3799	76.6267	71.0636	76.0677	FGFRL1	4	1009936	1026898	+	4342	protein_coding	fibroblast growth factor receptor like 1 [Source:HGNC Symbol;Acc:HGNC:3693]	-
ENSG00000225630	69.2158	39.3228	90.6944	66.7746	81.2746	73.7561	MTND2P28	1	629640	630683	+	1044	unprocessed_pseudogene	MT-ND2 pseudogene 28 [Source:HGNC Symbol;Acc:HGNC:42129]	-
ENSG00000198830	71.169	69.5159	72.3606	72.1097	58.8244	77.0077	HMGN2	1	26472440	26476642	+	3189	protein_coding	high mobility group nucleosomal binding domain 2 [Source:HGNC Symbol;Acc:HGNC:4986]	-
ENSG00000223803	43.6597	129.902	76.1678	67.5337	38.9452	63.837	RPS20P14	3	186900198	186900557	+	360	processed_pseudogene	ribosomal protein S20 pseudogene 14 [Source:HGNC Symbol;Acc:HGNC:36692]	-
ENSG00000118705	79.4932	66.0087	78.7408	59.6734	63.6624	71.7776	RPN2	20	37178410	37241619	+	2700	protein_coding	ribophorin II [Source:HGNC Symbol;Acc:HGNC:10382]	-
ENSG00000150779	45.7531	111.672	52.4554	74.6484	49.3956	84.0659	TIMM8B	11	112084800	112086798	-	1166	protein_coding	translocase of inner mitochondrial membrane 8 homolog B [Source:HGNC Symbol;Acc:HGNC:11818]	-
ENSG00000174177	39.4603	65.6799	51.1378	71.2794	88.6597	99.2686	CTU2	16	88706483	88715396	+	3522	protein_coding	cytosolic thiouridylase subunit 2 [Source:HGNC Symbol;Acc:HGNC:28005]	-
ENSG00000100138	58.0654	86.0746	63.1656	67.1835	62.9403	77.7728	SNU13	22	41673933	41690504	-	2927	protein_coding	small nuclear ribonucleoprotein 13 [Source:HGNC Symbol;Acc:HGNC:7819]	-
ENSG00000100029	52.4969	74.6572	57.5179	77.6493	67.3667	85.3873	PES1	22	30576625	30607083	-	4527	protein_coding	pescadillo ribosomal biogenesis factor 1 [Source:HGNC Symbol;Acc:HGNC:8848]	-
ENSG00000165802	40.3894	49.0015	48.3852	80.847	96.201	99.6914	NSMF	9	137447573	137459334	-	4912	protein_coding	NMDA receptor synaptonuclear signaling and neuronal migration factor [Source:HGNC Symbol;Acc:HGNC:29843]	-
ENSG00000132361	45.7186	46.4853	49.0621	74.7721	80.3829	114.947	CLUH	17	2689386	2712663	-	6900	protein_coding	clustered mitochondria homolog [Source:HGNC Symbol;Acc:HGNC:29094]	-
ENSG00000101160	74.8171	90.1621	75.9936	66.4052	47.6346	55.9492	CTSZ	20	58995185	59007254	-	2045	protein_coding	cathepsin Z [Source:HGNC Symbol;Acc:HGNC:2547]	-
ENSG00000134809	61.6039	105.922	72.8501	77.7193	37.2187	55.2574	TIMM10	11	57528464	57530803	-	776	protein_coding	translocase of inner mitochondrial membrane 10 [Source:HGNC Symbol;Acc:HGNC:11814]	-
ENSG00000166189	46.359	65.7972	56.9734	68.2761	71.0487	101.593	HPS6	10	102065390	102068038	+	2649	protein_coding	HPS6 biogenesis of lysosomal organelles complex 2 subunit 3 [Source:HGNC Symbol;Acc:HGNC:18817]	-
ENSG00000226221	45.5631	102.694	61.7645	63.3272	66.7083	69.745	RPL26P19	5	56504635	56505072	-	438	processed_pseudogene	ribosomal protein L26 pseudogene 19 [Source:HGNC Symbol;Acc:HGNC:36393]	-
ENSG00000172500	46.5452	74.7928	53.5618	86.3493	71.8199	76.6055	FIBP	11	65883741	65888539	-	3353	protein_coding	FGF1 intracellular binding protein [Source:HGNC Symbol;Acc:HGNC:3705]	-
ENSG00000119013	35.7496	96.9923	51.2232	86.0869	70.218	68.9819	NDUFB3	2	201071433	201085750	+	841	protein_coding	NADH:ubiquinone oxidoreductase subunit B3 [Source:HGNC Symbol;Acc:HGNC:7698]	-
ENSG00000005486	44.9975	65.4219	54.6581	63.929	93.2729	86.9509	RHBDD2	7	75842602	75888926	+	2390	protein_coding	rhomboid domain containing 2 [Source:HGNC Symbol;Acc:HGNC:23082]	-
ENSG00000167157	42.579	71.3965	52.2197	75.3433	80.4903	86.6014	PRRX2	9	129665647	129722674	+	1305	protein_coding	paired related homeobox 2 [Source:HGNC Symbol;Acc:HGNC:21338]	Homeobox
ENSG00000122705	65.6586	98.5073	76.7869	60.2709	46.0467	61.0387	CLTA	9	36190856	36304781	+	2515	protein_coding	clathrin light chain A [Source:HGNC Symbol;Acc:HGNC:2090]	-
ENSG00000182718	77.7676	78.2113	76.479	61.3456	63.2628	50.9845	ANXA2	15	60347134	60402883	-	8824	protein_coding	annexin A2 [Source:HGNC Symbol;Acc:HGNC:537]	-
ENSG00000004142	51.3193	74.8393	57.5716	71.4115	67.3393	85.2326	POLDIP2	17	28346633	28357527	-	2670	protein_coding	DNA polymerase delta interacting protein 2 [Source:HGNC Symbol;Acc:HGNC:23781]	-
ENSG00000173153	53.3311	88.6657	68.5215	75.1465	62.7496	59.1159	ESRRA	11	64305524	64316743	+	3078	protein_coding	estrogen related receptor alpha [Source:HGNC Symbol;Acc:HGNC:3471]	ESR-like
ENSG00000066322	65.0096	115.385	75.9186	51.7774	47.7786	51.3325	ELOVL1	1	43363398	43368074	-	2506	protein_coding	ELOVL fatty acid elongase 1 [Source:HGNC Symbol;Acc:HGNC:14418]	-
ENSG00000130511	42.3894	44.0526	47.2867	94.2145	87.0067	91.3153	SSBP4	19	18418864	18434562	+	2974	protein_coding	single stranded DNA binding protein 4 [Source:HGNC Symbol;Acc:HGNC:15676]	-
ENSG00000130332	57.4427	74.6889	49.096	96.12	51.1582	77.1296	LSM7	19	2321520	2328611	-	1686	protein_coding	LSM7 homolog, U6 small nuclear RNA and mRNA degradation associated [Source:HGNC Symbol;Acc:HGNC:20470]	-
ENSG00000168002	69.5725	105.434	71.1169	71.4331	33.3774	54.1143	POLR2G	11	62761565	62766710	+	1902	protein_coding	RNA polymerase II subunit G [Source:HGNC Symbol;Acc:HGNC:9194]	-
ENSG00000125991	51.0504	112.284	64.5013	61.9772	56.6501	58.5273	ERGIC3	20	35542021	35557634	+	6012	protein_coding	ERGIC and golgi 3 [Source:HGNC Symbol;Acc:HGNC:15927]	-
ENSG00000168066	58.1412	50.2866	56.1689	72.9409	67.5471	99.8531	SF1	11	64764606	64778786	-	5972	protein_coding	splicing factor 1 [Source:HGNC Symbol;Acc:HGNC:12950]	-
ENSG00000213585	76.4475	59.3605	68.6911	64.5173	57.3502	78.4295	VDAC1	5	133971871	134004975	-	3049	protein_coding	voltage dependent anion channel 1 [Source:HGNC Symbol;Acc:HGNC:12669]	-
ENSG00000106348	44.9864	53.5425	48.7612	67.8391	86.8935	101.96	IMPDH1	7	128392277	128410252	-	3662	protein_coding	inosine monophosphate dehydrogenase 1 [Source:HGNC Symbol;Acc:HGNC:6052]	-
ENSG00000181524	48.3324	108.112	65.4809	78.9655	41.2948	59.4137	RPL24P4	6	42956345	42956765	-	421	processed_pseudogene	ribosomal protein L24 pseudogene 4 [Source:HGNC Symbol;Acc:HGNC:21371]	-
ENSG00000181817	59.5881	123.557	61.3098	58.6874	39.8824	57.0383	LSM10	1	36391238	36397908	-	1506	protein_coding	LSM10, U7 small nuclear RNA associated [Source:HGNC Symbol;Acc:HGNC:17562]	-
ENSG00000114383	41.5072	86.2386	56.2358	65.5402	74.627	75.3985	TUSC2	3	50320027	50328251	-	2404	protein_coding	tumor suppressor 2, mitochondrial calcium regulator [Source:HGNC Symbol;Acc:HGNC:17034]	-
ENSG00000099399	83.4804	92.7444	74.3824	46.6822	43.0641	58.947	MAGEB2	X	30215563	30220089	+	1607	protein_coding	MAGE family member B2 [Source:HGNC Symbol;Acc:HGNC:6809]	-
ENSG00000123136	60.9949	86.1945	70.4287	59.7504	48.499	72.0067	DDX39A	19	14408798	14419383	-	3861	protein_coding	DExD-box helicase 39A [Source:HGNC Symbol;Acc:HGNC:17821]	-
ENSG00000145494	55.1048	100.501	58.5167	76.5103	45.2977	61.2767	NDUFS6	5	1801400	1816605	+	1451	protein_coding	NADH:ubiquinone oxidoreductase subunit S6 [Source:HGNC Symbol;Acc:HGNC:7713]	-
ENSG00000105329	48.537	54.1407	59.0323	75.2636	79.418	80.675	TGFB1	19	41301587	41353922	-	3249	protein_coding	transforming growth factor beta 1 [Source:HGNC Symbol;Acc:HGNC:11766]	-
ENSG00000198736	43.6902	100.003	55.5524	59.4077	63.4389	74.9698	MSRB1	16	1938210	1943326	-	2157	protein_coding	methionine sulfoxide reductase B1 [Source:HGNC Symbol;Acc:HGNC:14133]	-
ENSG00000031698	61.1343	110.902	65.0713	63.4788	54.3618	41.8497	SARS	1	109213918	109238182	+	3849	protein_coding	seryl-tRNA synthetase [Source:HGNC Symbol;Acc:HGNC:10537]	-
ENSG00000168090	55.5724	98.8478	64.9688	62.1338	54.507	60.686	COPS6	7	100088969	100092187	+	2779	protein_coding	COP9 signalosome subunit 6 [Source:HGNC Symbol;Acc:HGNC:21749]	-
ENSG00000148834	66.7605	110.409	81.947	53.8555	36.4146	46.1161	GSTO1	10	104235356	104267459	+	1691	protein_coding	glutathione S-transferase omega 1 [Source:HGNC Symbol;Acc:HGNC:13312]	-
ENSG00000101412	39.4216	46.1158	42.4682	88.0577	96.3177	82.3068	E2F1	20	33675477	33686385	-	2690	protein_coding	E2F transcription factor 1 [Source:HGNC Symbol;Acc:HGNC:3113]	E2F
ENSG00000172053	54.9283	86.1335	56.9442	76.5285	55.7114	64.2399	QARS	3	49095932	49105130	-	4703	protein_coding	glutaminyl-tRNA synthetase [Source:HGNC Symbol;Acc:HGNC:9751]	-
ENSG00000106244	76.8638	77.5076	64.2735	72.1653	46.1436	56.4947	PDAP1	7	99392048	99408597	-	2912	protein_coding	PDGFA associated protein 1 [Source:HGNC Symbol;Acc:HGNC:14634]	-
ENSG00000165886	44.3497	69.5758	55.3469	62.3488	76.0006	85.7626	UBTD1	10	97498924	97571206	+	1647	protein_coding	ubiquitin domain containing 1 [Source:HGNC Symbol;Acc:HGNC:25683]	-
ENSG00000104805	71.0208	85.093	74.5734	61.6963	49.1072	50.8471	NUCB1	19	48900312	48923372	+	3675	protein_coding	nucleobindin 1 [Source:HGNC Symbol;Acc:HGNC:8043]	-
ENSG00000157593	51.7768	90.0765	60.0114	53.575	63.8655	72.9707	SLC35B2	6	44254096	44257890	-	2363	protein_coding	solute carrier family 35 member B2 [Source:HGNC Symbol;Acc:HGNC:16872]	-
ENSG00000185627	66.403	112.137	70.0295	50.8455	36.4972	56.0101	PSMD13	11	236966	252984	+	4347	protein_coding	proteasome 26S subunit, non-ATPase 13 [Source:HGNC Symbol;Acc:HGNC:9558]	-
ENSG00000130303	78.7826	168.278	133.272	3.96497	4.02398	3.11824	BST2	19	17402939	17405630	-	1101	protein_coding	bone marrow stromal cell antigen 2 [Source:HGNC Symbol;Acc:HGNC:1119]	-
ENSG00000092010	56.6616	68.2407	80.9638	65.6857	47.0816	71.9586	PSME1	14	24136163	24138967	+	1776	protein_coding	proteasome activator subunit 1 [Source:HGNC Symbol;Acc:HGNC:9568]	-
ENSG00000114867	59.7362	45.4821	53.5613	77.2057	58.7503	95.1481	EIF4G1	3	184314495	184335358	+	8257	protein_coding	eukaryotic translation initiation factor 4 gamma 1 [Source:HGNC Symbol;Acc:HGNC:3296]	-
ENSG00000228253	51.3551	29.7485	88.4289	56.1293	85.3408	78.1884	MT-ATP8	MT	8366	8572	+	207	protein_coding	mitochondrially encoded ATP synthase membrane subunit 8 [Source:HGNC Symbol;Acc:HGNC:7415]	-
ENSG00000197043	69.1347	129.079	70.8158	46.0855	34.5004	39.4963	ANXA6	5	151100706	151157785	-	5478	protein_coding	annexin A6 [Source:HGNC Symbol;Acc:HGNC:544]	-
ENSG00000145912	65.6497	74.7654	52.0921	92.557	45.0877	58.3256	NHP2	5	178149460	178153967	-	1510	protein_coding	NHP2 ribonucleoprotein [Source:HGNC Symbol;Acc:HGNC:14377]	-
ENSG00000137161	60.7409	88.2073	63.2496	68.4498	54.874	51.9679	CNPY3	6	42929192	42939294	+	1719	protein_coding	canopy FGF signaling regulator 3 [Source:HGNC Symbol;Acc:HGNC:11968]	-
ENSG00000171222	46.0053	61.524	45.5959	88.0893	66.1678	79.4374	SCAND1	20	35953617	35959472	-	1996	protein_coding	SCAN domain containing 1 [Source:HGNC Symbol;Acc:HGNC:10566]	-
ENSG00000116863	47.0074	86.4347	54.0551	59.1875	63.3162	75.5819	ADPRHL2	1	36088892	36093932	+	1651	protein_coding	ADP-ribosylhydrolase like 2 [Source:HGNC Symbol;Acc:HGNC:21304]	-
ENSG00000130724	56.8724	83.3241	58.1137	68.561	61.636	57.0481	CHMP2A	19	58551566	58555105	-	2110	protein_coding	charged multivesicular body protein 2A [Source:HGNC Symbol;Acc:HGNC:30216]	-
ENSG00000101474	64.5439	110.454	65.9835	52.3466	41.1664	49.6057	APMAP	20	24962925	24992751	-	2226	protein_coding	adipocyte plasma membrane associated protein [Source:HGNC Symbol;Acc:HGNC:13238]	-
ENSG00000133275	57.3696	76.712	64.239	70.7486	55.1911	59.7989	CSNK1G2	19	1941172	1981338	+	3781	protein_coding	casein kinase 1 gamma 2 [Source:HGNC Symbol;Acc:HGNC:2455]	-
ENSG00000198113	60.3863	69.0043	69.9706	61.9114	58.2996	63.9336	TOR4A	9	137277726	137282641	+	4171	protein_coding	torsin family 4 member A [Source:HGNC Symbol;Acc:HGNC:25981]	-
ENSG00000078808	69.135	76.155	67.1921	65.0516	48.4342	57.3661	SDF4	1	1216908	1232067	-	4745	protein_coding	stromal cell derived factor 4 [Source:HGNC Symbol;Acc:HGNC:24188]	-
ENSG00000129911	45.736	48.8053	53.9328	76.2179	70.2999	87.9237	KLF16	19	1852399	1863579	-	2966	protein_coding	Kruppel like factor 16 [Source:HGNC Symbol;Acc:HGNC:16857]	zf-C2H2
ENSG00000173207	71.1821	129.864	89.8809	44.8598	18.8854	27.9062	CKS1B	1	154974653	154979251	+	2340	protein_coding	CDC28 protein kinase regulatory subunit 1B [Source:HGNC Symbol;Acc:HGNC:19083]	-
ENSG00000205138	47.118	98.6735	62.7198	54.4139	51.0102	68.0577	SDHAF1	19	35995199	35996315	+	1117	protein_coding	succinate dehydrogenase complex assembly factor 1 [Source:HGNC Symbol;Acc:HGNC:33867]	-
ENSG00000089327	54.2718	58.8705	68.7942	62.8493	69.6185	67.4179	FXYD5	19	35154730	35169881	+	2991	protein_coding	FXYD domain containing ion transport regulator 5 [Source:HGNC Symbol;Acc:HGNC:4029]	-
ENSG00000101224	49.1174	50.1877	50.2357	73.1075	72.6168	86.5174	CDC25B	20	3786772	3806121	+	4314	protein_coding	cell division cycle 25B [Source:HGNC Symbol;Acc:HGNC:1726]	-
ENSG00000062822	40.0506	53.1603	46.3964	70.4954	89.7934	81.4679	POLD1	19	50384204	50418018	+	4934	protein_coding	DNA polymerase delta 1, catalytic subunit [Source:HGNC Symbol;Acc:HGNC:9175]	-
ENSG00000234743	58.3454	99.2258	56.2811	62.972	50.1714	54.2438	EIF5AP4	10	80247219	80247683	-	465	processed_pseudogene	eukaryotic translation initiation factor 5A pseudogene 4 [Source:HGNC Symbol;Acc:HGNC:31442]	-
ENSG00000175061	62.2096	128.819	74.2815	49.4532	24.6097	41.6133	SNHG29	17	16438767	16478678	+	7176	lncRNA	small nucleolar RNA host gene 29 [Source:HGNC Symbol;Acc:HGNC:28619]	-
ENSG00000105135	37.6605	67.697	47.3595	64.4937	86.0489	76.9392	ILVBL	19	15114984	15125786	-	5616	protein_coding	ilvB acetolactate synthase like [Source:HGNC Symbol;Acc:HGNC:6041]	-
ENSG00000088986	49.0858	101.943	58.8406	49.0357	42.1708	78.8858	DYNLL1	12	120469850	120498493	+	2931	protein_coding	dynein light chain LC8-type 1 [Source:HGNC Symbol;Acc:HGNC:15476]	-
ENSG00000240376	58.2709	104.569	61.2415	79.7598	30.7599	45.1134	AC010343.1	5	33162179	33162807	+	629	processed_pseudogene	ribosomal protein S8 (RPS8) pseudogene	-
ENSG00000167965	33.8654	49.126	38.2235	77.0652	91.8392	87.9508	MLST8	16	2204248	2209453	+	4360	protein_coding	MTOR associated protein, LST8 homolog [Source:HGNC Symbol;Acc:HGNC:24825]	-
ENSG00000100462	60.6589	91.2888	56.5935	52.646	47.7271	69.1025	PRMT5	14	22920525	22929408	-	3276	protein_coding	protein arginine methyltransferase 5 [Source:HGNC Symbol;Acc:HGNC:10894]	-
ENSG00000126368	53.5381	57.0765	64.0096	69.3056	70.6664	63.4048	NR1D1	17	40092793	40100589	-	2630	protein_coding	nuclear receptor subfamily 1 group D member 1 [Source:HGNC Symbol;Acc:HGNC:7962]	THR-like
ENSG00000167770	41.4456	63.5557	45.1329	67.6514	78.8876	81.3179	OTUB1	11	63985853	64001811	+	5336	protein_coding	OTU deubiquitinase, ubiquitin aldehyde binding 1 [Source:HGNC Symbol;Acc:HGNC:23077]	-
ENSG00000165637	77.1909	79.0488	81.4184	49.3192	41.3417	49.6675	VDAC2	10	75210154	75231448	+	2827	protein_coding	voltage dependent anion channel 2 [Source:HGNC Symbol;Acc:HGNC:12672]	-
ENSG00000165905	42.9266	47.2427	48.4566	71.125	80.7667	85.7412	LARGE2	11	45921621	45929096	+	3151	protein_coding	LARGE xylosyl- and glucuronyltransferase 2 [Source:HGNC Symbol;Acc:HGNC:16522]	-
ENSG00000142186	48.1747	64.2352	53.6327	67.9918	67.7242	73.6484	SCYL1	11	65525077	65538704	+	4282	protein_coding	SCY1 like pseudokinase 1 [Source:HGNC Symbol;Acc:HGNC:14372]	-
ENSG00000104852	53.2157	58.7413	51.635	79.5632	59.6011	72.548	SNRNP70	19	49085419	49108605	+	4684	protein_coding	small nuclear ribonucleoprotein U1 subunit 70 [Source:HGNC Symbol;Acc:HGNC:11150]	-
ENSG00000157778	48.9216	102.228	62.149	58.6846	44.7682	58.4526	PSMG3	7	1567332	1571005	-	1973	protein_coding	proteasome assembly chaperone 3 [Source:HGNC Symbol;Acc:HGNC:22420]	-
ENSG00000177666	46.4577	49.2004	54.9958	73.0509	76.1215	75.3505	PNPLA2	11	818914	825573	+	3831	protein_coding	patatin like phospholipase domain containing 2 [Source:HGNC Symbol;Acc:HGNC:30802]	-
ENSG00000158825	63.5476	74.2262	67.0584	58.8064	51.7724	58.6153	CDA	1	20589086	20618903	+	820	protein_coding	cytidine deaminase [Source:HGNC Symbol;Acc:HGNC:1712]	-
ENSG00000169714	78.6878	84.429	89.3832	46.4931	40.7439	34.2871	CNBP	3	129169484	129183922	-	1927	protein_coding	CCHC-type zinc finger nucleic acid binding protein [Source:HGNC Symbol;Acc:HGNC:13164]	-
ENSG00000181789	68.3866	69.42	63.13	58.4031	50.4413	63.9689	COPG1	3	129249606	129277773	+	4425	protein_coding	coatomer protein complex subunit gamma 1 [Source:HGNC Symbol;Acc:HGNC:2236]	-
ENSG00000136840	50.9754	56.3335	58.0735	60.9113	73.0779	74.2162	ST6GALNAC4	9	127907886	127917041	-	2633	protein_coding	ST6 N-acetylgalactosaminide alpha-2,6-sialyltransferase 4 [Source:HGNC Symbol;Acc:HGNC:17846]	-
ENSG00000146677	46.5156	121.4	69.7294	62.3869	28.178	45.3361	AC004453.1	7	44467897	44468304	+	408	processed_pseudogene	ribosomal protein L32 (RPL32) pseudogene	-
ENSG00000115241	59.8469	64.9404	62.5092	65.2104	53.9473	66.7853	PPM1G	2	27381195	27409591	-	3995	protein_coding	protein phosphatase, Mg2+/Mn2+ dependent 1G [Source:HGNC Symbol;Acc:HGNC:9278]	-
ENSG00000166598	86.6237	64.0021	76.175	31.8136	71.1674	43.2627	HSP90B1	12	103930107	103953645	+	4695	protein_coding	heat shock protein 90 beta family member 1 [Source:HGNC Symbol;Acc:HGNC:12028]	-
ENSG00000235655	69.1848	61.0171	76.9116	57.8463	56.2175	51.3128	H3F3AP4	2	174719908	174720318	+	411	processed_pseudogene	H3 histone, family 3A, pseudogene 4 [Source:HGNC Symbol;Acc:HGNC:42980]	-
ENSG00000106636	58.2157	106.267	59.6117	54.6959	40.5744	52.2794	YKT6	7	44200968	44214294	+	3707	protein_coding	YKT6 v-SNARE homolog [Source:HGNC Symbol;Acc:HGNC:16959]	-
ENSG00000197879	55.7434	61.7837	58.9914	66.5411	60.3414	67.8569	MYO1C	17	1464186	1492686	-	7806	protein_coding	myosin IC [Source:HGNC Symbol;Acc:HGNC:7597]	-
ENSG00000168439	51.7317	54.5209	45.0361	66.3097	57.0685	96.4841	STIP1	11	64185272	64204543	+	4657	protein_coding	stress induced phosphoprotein 1 [Source:HGNC Symbol;Acc:HGNC:11387]	-
ENSG00000165215	43.9734	88.7553	56.3178	70.2708	62.684	48.8915	CLDN3	7	73768997	73770270	-	1274	protein_coding	claudin 3 [Source:HGNC Symbol;Acc:HGNC:2045]	-
ENSG00000099812	54.3409	67.7728	65.1504	59.9036	67.2032	55.3936	MISP	19	751112	764318	+	2980	protein_coding	mitotic spindle positioning [Source:HGNC Symbol;Acc:HGNC:27000]	-
ENSG00000173465	39.7637	83.4704	43.6322	66.3796	59.2565	77.1848	ZNRD2	11	65570460	65573942	+	1978	protein_coding	zinc ribbon domain containing 2 [Source:HGNC Symbol;Acc:HGNC:11328]	-
ENSG00000174851	39.4922	79.4267	55.7384	54.1294	71.315	68.3918	YIF1A	11	66284580	66289145	-	2345	protein_coding	Yip1 interacting factor homolog A, membrane trafficking protein [Source:HGNC Symbol;Acc:HGNC:16688]	-
ENSG00000077549	62.3989	77.7007	64.5028	57.8713	46.3158	59.0112	CAPZB	1	19338775	19485539	-	3239	protein_coding	capping actin protein of muscle Z-line subunit beta [Source:HGNC Symbol;Acc:HGNC:1491]	-
ENSG00000129968	35.8756	62.8165	41.313	64.699	82.3174	80.1884	ABHD17A	19	1876810	1885547	-	6139	protein_coding	abhydrolase domain containing 17A [Source:HGNC Symbol;Acc:HGNC:28756]	-
ENSG00000067829	39.4619	75.9097	48.3775	67.7785	67.062	68.5951	IDH3G	X	153785766	153794523	-	2717	protein_coding	isocitrate dehydrogenase (NAD(+)) 3 gamma [Source:HGNC Symbol;Acc:HGNC:5386]	-
ENSG00000148308	46.4804	62.5614	52.3925	65.0478	66.7758	73.7125	GTF3C5	9	133030675	133058503	+	3592	protein_coding	general transcription factor IIIC subunit 5 [Source:HGNC Symbol;Acc:HGNC:4668]	-
novel.388	47.6179	78.1937	50.5699	64.228	59.5736	66.2031	-	CHR_HG2419_PATCH	144423596	144428664	-	1397	-	- && Q9UK41.1 RecName: Full=Vacuolar protein sorting-associated protein 28 homolog; Short=H-Vps28; AltName: Full=ESCRT-I complex subunit VPS28 && PF03997:VPS28 protein	-
ENSG00000128309	36.3039	72.1622	53.4928	61.9546	75.2449	66.8934	MPST	22	37019635	37029822	+	6760	protein_coding	mercaptopyruvate sulfurtransferase [Source:HGNC Symbol;Acc:HGNC:7223]	-
ENSG00000070404	58.767	81.3009	77.1004	42.9579	54.6758	51.2377	FSTL3	19	676392	683392	+	3033	protein_coding	follistatin like 3 [Source:HGNC Symbol;Acc:HGNC:3973]	-
ENSG00000130305	44.9218	78.1362	61.0504	52.1718	60.0204	67.6145	NSUN5	7	73302516	73308826	-	3374	protein_coding	NOP2/Sun RNA methyltransferase 5 [Source:HGNC Symbol;Acc:HGNC:16385]	-
ENSG00000058262	67.031	59.2983	57.8124	58.476	51.3674	69.2344	SEC61A1	3	128051641	128071683	+	4640	protein_coding	SEC61 translocon alpha 1 subunit [Source:HGNC Symbol;Acc:HGNC:18276]	-
ENSG00000108829	70.576	64.4377	67.6192	48.6248	42.1102	68.9538	LRRC59	17	50375059	50397523	-	4540	protein_coding	leucine rich repeat containing 59 [Source:HGNC Symbol;Acc:HGNC:28817]	-
ENSG00000126461	53.8368	49.4809	54.1633	66.3481	56.2067	81.9151	SCAF1	19	49642209	49658642	+	4464	protein_coding	SR-related CTD associated factor 1 [Source:HGNC Symbol;Acc:HGNC:30403]	-
ENSG00000185475	40.5009	65.0354	57.2855	57.3365	80.2437	61.4932	TMEM179B	11	62787402	62790400	+	1504	protein_coding	transmembrane protein 179B [Source:HGNC Symbol;Acc:HGNC:33744]	-
ENSG00000231313	40.7161	149.893	70.1624	35.8066	31.5262	33.7744	CLIC1P1	12	120914400	120915123	+	724	processed_pseudogene	chloride intracellular channel 1 pseudogene 1 [Source:HGNC Symbol;Acc:HGNC:32691]	-
ENSG00000196878	94.1006	90.129	113.995	29.5264	16.28	17.7009	LAMB3	1	209614870	209652425	-	4647	protein_coding	laminin subunit beta 3 [Source:HGNC Symbol;Acc:HGNC:6490]	-
ENSG00000184640	49.6219	52.0071	52.1481	67.9046	65.0728	74.5749	SEPTIN9	17	77280569	77500596	+	12817	protein_coding	septin 9 [Source:HGNC Symbol;Acc:HGNC:7323]	-
ENSG00000167772	74.177	79.041	90.5326	31.3416	38.6563	46.6817	ANGPTL4	19	8363289	8374370	+	2475	protein_coding	angiopoietin like 4 [Source:HGNC Symbol;Acc:HGNC:16039]	-
ENSG00000139644	74.5165	71.4138	71.4811	48.7256	43.7697	49.9606	TMBIM6	12	49707725	49764934	+	6186	protein_coding	transmembrane BAX inhibitor motif containing 6 [Source:HGNC Symbol;Acc:HGNC:11723]	-
ENSG00000105223	46.3668	60.6788	54.7167	70.0096	64.1266	62.5126	PLD3	19	40348456	40380439	+	5186	protein_coding	phospholipase D family member 3 [Source:HGNC Symbol;Acc:HGNC:17158]	-
ENSG00000173511	44.4494	50.6592	43.4894	68.3777	72.2339	78.772	VEGFB	11	64234538	64238793	+	1545	protein_coding	vascular endothelial growth factor B [Source:HGNC Symbol;Acc:HGNC:12681]	-
ENSG00000132153	45.4015	53.2085	54.9355	60.1965	65.09	78.8683	DHX30	3	47802909	47850195	+	7744	protein_coding	DExH-box helicase 30 [Source:HGNC Symbol;Acc:HGNC:16716]	-
ENSG00000101161	54.9011	66.429	55.8285	56.9112	51.627	71.8815	PRPF6	20	63981132	64033100	+	3047	protein_coding	pre-mRNA processing factor 6 [Source:HGNC Symbol;Acc:HGNC:15860]	-
ENSG00000102882	36.8305	61.7349	47.9469	64.1952	72.1457	74.3044	MAPK3	16	30114105	30123506	-	3669	protein_coding	mitogen-activated protein kinase 3 [Source:HGNC Symbol;Acc:HGNC:6877]	-
ENSG00000073111	47.9278	53.2445	44.03	66.0068	61.1242	84.3603	MCM2	3	127598410	127622436	+	4715	protein_coding	minichromosome maintenance complex component 2 [Source:HGNC Symbol;Acc:HGNC:6944]	-
ENSG00000110092	67.8238	42.9783	55.9187	58.8871	64.5339	66.4819	CCND1	11	69641087	69654474	+	4830	protein_coding	cyclin D1 [Source:HGNC Symbol;Acc:HGNC:1582]	-
ENSG00000149357	44.1094	70.8188	53.9042	57.1164	57.1034	73.0886	LAMTOR1	11	72085895	72103297	-	2688	protein_coding	late endosomal/lysosomal adaptor, MAPK and MTOR activator 1 [Source:HGNC Symbol;Acc:HGNC:26068]	-
ENSG00000167671	38.892	84.8403	47.6918	66.0598	65.8394	52.7056	UBXN6	19	4444999	4457794	-	5247	protein_coding	UBX domain protein 6 [Source:HGNC Symbol;Acc:HGNC:14928]	-
ENSG00000168476	49.8775	51.4757	56.1568	70.569	61.1546	66.4473	REEP4	8	22138020	22141951	-	2266	protein_coding	receptor accessory protein 4 [Source:HGNC Symbol;Acc:HGNC:26176]	-
ENSG00000101421	62.0424	78.8281	71.0811	48.8402	45.1589	49.684	CHMP4B	20	33811348	33854366	+	1602	protein_coding	charged multivesicular body protein 4B [Source:HGNC Symbol;Acc:HGNC:16171]	-
ENSG00000167136	34.0044	77.3982	43.5943	57.4237	67.7381	74.9603	ENDOG	9	128818500	128822676	+	1145	protein_coding	endonuclease G [Source:HGNC Symbol;Acc:HGNC:3346]	-
ENSG00000128311	34.2246	77.2638	49.779	59.3961	69.2274	65.063	TST	22	37010859	37020183	-	1877	protein_coding	thiosulfate sulfurtransferase [Source:HGNC Symbol;Acc:HGNC:12388]	-
ENSG00000130545	41.128	97.1662	56.1916	56.4149	53.4523	50.5781	CRB3	19	6463777	6467221	+	1600	protein_coding	crumbs cell polarity complex component 3 [Source:HGNC Symbol;Acc:HGNC:20237]	-
ENSG00000002330	29.4396	66.1504	40.0277	58.156	76.6025	83.1919	BAD	11	64269830	64284704	-	1708	protein_coding	BCL2 associated agonist of cell death [Source:HGNC Symbol;Acc:HGNC:936]	-
ENSG00000134590	45.1929	47.4679	51.9279	55.3849	73.2535	80.2926	RTL8C	X	135032355	135033546	+	1192	protein_coding	retrotransposon Gag like 8C [Source:HGNC Symbol;Acc:HGNC:2569]	-
ENSG00000139637	39.6263	67.434	49.2832	69.2022	60.5451	67.2063	C12orf10	12	53299695	53307177	+	2500	protein_coding	chromosome 12 open reading frame 10 [Source:HGNC Symbol;Acc:HGNC:17590]	-
ENSG00000133243	36.2577	42.5022	42.7774	74.6191	80.5114	76.4764	BTBD2	19	1985438	2034881	-	5934	protein_coding	BTB domain containing 2 [Source:HGNC Symbol;Acc:HGNC:15504]	-
ENSG00000213445	39.1559	52.3541	46.8386	66.5831	70.1616	77.8516	SIPA1	11	65638101	65650918	+	4652	protein_coding	signal-induced proliferation-associated 1 [Source:HGNC Symbol;Acc:HGNC:10885]	-
ENSG00000129103	56.5984	99.5608	62.5427	51.7501	38.0575	43.9935	SUMF2	7	56064002	56080670	+	4101	protein_coding	sulfatase modifying factor 2 [Source:HGNC Symbol;Acc:HGNC:20415]	-
ENSG00000101365	51.4222	69.4982	49.0852	62.9221	56.3869	62.9411	IDH3B	20	2658395	2664219	-	2567	protein_coding	isocitrate dehydrogenase (NAD(+)) 3 beta [Source:HGNC Symbol;Acc:HGNC:5385]	-
ENSG00000226608	36.438	84.5129	47.1988	50.4976	66.0652	67.2783	FTLP3	20	4023917	4024444	+	528	processed_pseudogene	ferritin light chain pseudogene 3 [Source:HGNC Symbol;Acc:HGNC:4000]	-
ENSG00000141959	37.7892	48.0423	42.777	69.809	80.0377	73.2519	PFKL	21	44300051	44327376	+	8926	protein_coding	phosphofructokinase, liver type [Source:HGNC Symbol;Acc:HGNC:8876]	-
ENSG00000171298	48.2656	50.4691	58.2096	68.5587	58.6623	66.9069	GAA	17	80101556	80119881	+	5236	protein_coding	glucosidase alpha, acid [Source:HGNC Symbol;Acc:HGNC:4065]	-
ENSG00000171425	40.5268	73.7436	48.9189	69.2965	66.0282	52.1095	ZNF581	19	55635459	55645623	+	1635	protein_coding	zinc finger protein 581 [Source:HGNC Symbol;Acc:HGNC:25017]	zf-C2H2
ENSG00000125651	55.9204	69.3857	55.1349	63.7278	48.1837	57.9083	GTF2F1	19	6379572	6393981	-	2876	protein_coding	general transcription factor IIF subunit 1 [Source:HGNC Symbol;Acc:HGNC:4652]	-
ENSG00000101363	52.7164	72.8803	63.3759	58.7203	49.28	51.872	MANBAL	20	37289638	37317260	+	2045	protein_coding	mannosidase beta like [Source:HGNC Symbol;Acc:HGNC:15799]	-
ENSG00000185896	56.4251	54.8438	55.2661	64.1307	53.9808	62.9742	LAMP1	13	113297239	113323672	+	5741	protein_coding	lysosomal associated membrane protein 1 [Source:HGNC Symbol;Acc:HGNC:6499]	-
novel.672	22.9317	18.7027	17.3702	218.957	33.2858	36.1657	-	CHR_HSCHR22_1_CTG7	23765833	23767982	-	711	-	- && Q8WYQ3.1 RecName: Full=Coiled-coil-helix-coiled-coil-helix domain-containing protein 10, mitochondrial; AltName: Full=Protein N27C7-4; Flags: Precursor && -	-
ENSG00000116288	64.1567	88.985	67.4714	57.27	29.8771	39.3439	PARK7	1	7954291	7985505	+	2397	protein_coding	Parkinsonism associated deglycase [Source:HGNC Symbol;Acc:HGNC:16369]	-
ENSG00000184207	39.8026	67.4983	48.304	53.0874	58.0485	79.6756	PGP	16	2211593	2214840	-	3164	protein_coding	phosphoglycolate phosphatase [Source:HGNC Symbol;Acc:HGNC:8909]	-
ENSG00000100297	38.4326	44.5737	39.7101	68.7961	68.4346	86.328	MCM5	22	35400134	35425431	+	7268	protein_coding	minichromosome maintenance complex component 5 [Source:HGNC Symbol;Acc:HGNC:6948]	-
ENSG00000187653	77.7782	89.2456	92.0276	31.3416	38.2182	17.646	TMSB4XP8	4	90838903	90839037	-	135	processed_pseudogene	TMSB4X pseudogene 8 [Source:HGNC Symbol;Acc:HGNC:11885]	-
ENSG00000221829	36.8677	66.2304	44.71	60.2103	69.8608	68.0293	FANCG	9	35073835	35080016	-	3614	protein_coding	FA complementation group G [Source:HGNC Symbol;Acc:HGNC:3588]	-
ENSG00000104408	36.2961	75.2903	56.3621	71.3881	59.7887	46.7294	EIF3E	8	108201216	108435333	-	6005	protein_coding	eukaryotic translation initiation factor 3 subunit E [Source:HGNC Symbol;Acc:HGNC:3277]	-
ENSG00000209082	44.3481	33.3184	91.1563	64.4741	50.0991	61.6572	MT-TL1	MT	3230	3304	+	75	Mt_tRNA	mitochondrially encoded tRNA-Leu (UUA/G) 1 [Source:HGNC Symbol;Acc:HGNC:7490]	-
ENSG00000146425	43.6405	110.038	64.825	51.8999	27.1954	47.4297	DYNLT1	6	158636474	158644743	-	2953	protein_coding	dynein light chain Tctex-type 1 [Source:HGNC Symbol;Acc:HGNC:11697]	-
ENSG00000125826	55.85	89.1347	64.5615	56.1618	44.3464	34.0574	RBCK1	20	407498	430966	+	4024	protein_coding	RANBP2-type and C3HC4-type zinc finger containing 1 [Source:HGNC Symbol;Acc:HGNC:15864]	-
ENSG00000109736	46.4474	60.769	56.2022	55.5671	59.7494	65.2583	MFSD10	4	2930561	2934834	-	3134	protein_coding	major facilitator superfamily domain containing 10 [Source:HGNC Symbol;Acc:HGNC:16894]	-
ENSG00000160691	55.1843	83.6138	58.4956	51.1979	41.7185	53.6057	SHC1	1	154962298	154974395	-	4342	protein_coding	SHC adaptor protein 1 [Source:HGNC Symbol;Acc:HGNC:10840]	-
ENSG00000161714	39.4515	47.5589	46.3978	68.0065	71.2482	70.9371	PLCD3	17	45108959	45133354	-	6748	protein_coding	phospholipase C delta 3 [Source:HGNC Symbol;Acc:HGNC:9061]	-
ENSG00000214530	40.1678	66.1284	51.3602	57.7834	65.574	61.8687	STARD10	11	72754729	72793681	-	3710	protein_coding	StAR related lipid transfer domain containing 10 [Source:HGNC Symbol;Acc:HGNC:10666]	-
ENSG00000105671	38.1719	67.9465	42.6492	57.1251	63.7994	73.1168	DDX49	19	18919705	18929189	+	3306	protein_coding	DEAD-box helicase 49 [Source:HGNC Symbol;Acc:HGNC:18684]	-
ENSG00000110057	42.1997	52.4974	48.6276	65.5651	71.4653	61.9211	UNC93B1	11	67991100	68004982	-	3536	protein_coding	unc-93 homolog B1, TLR signaling regulator [Source:HGNC Symbol;Acc:HGNC:13481]	-
ENSG00000086504	37.0201	62.469	40.9584	70.1743	59.2222	71.9927	MRPL28	16	366969	371289	-	3053	protein_coding	mitochondrial ribosomal protein L28 [Source:HGNC Symbol;Acc:HGNC:14484]	-
ENSG00000159363	39.0214	44.0876	46.0699	62.3277	72.6716	77.5209	ATP13A2	1	16985958	17011928	-	5253	protein_coding	ATPase cation transporting 13A2 [Source:HGNC Symbol;Acc:HGNC:30213]	-
ENSG00000071127	53.819	71.994	60.4204	52.2817	47.2609	55.7154	WDR1	4	10074339	10116949	-	7827	protein_coding	WD repeat domain 1 [Source:HGNC Symbol;Acc:HGNC:12754]	-
ENSG00000247077	51.6197	52.3686	58.8366	53.6163	51.909	72.4229	PGAM5	12	132710819	132722734	+	3952	protein_coding	PGAM family member 5, mitochondrial serine/threonine protein phosphatase [Source:HGNC Symbol;Acc:HGNC:28763]	-
ENSG00000149932	39.5916	73.1386	53.9983	58.6842	57.9921	57.0365	TMEM219	16	29940885	29973050	+	2377	protein_coding	transmembrane protein 219 [Source:HGNC Symbol;Acc:HGNC:25201]	-
ENSG00000120053	58.653	72.7514	58.1373	60.317	46.2946	43.2992	GOT1	10	99396870	99430624	-	2424	protein_coding	glutamic-oxaloacetic transaminase 1 [Source:HGNC Symbol;Acc:HGNC:4432]	-
ENSG00000073350	40.859	57.2779	47.8872	60.3248	66.8236	65.9278	LLGL2	17	75525080	75575208	+	7909	protein_coding	LLGL scribble cell polarity complex component 2 [Source:HGNC Symbol;Acc:HGNC:6629]	-
ENSG00000063241	37.225	78.6771	46.396	55.4288	56.4373	64.7719	ISOC2	19	55452985	55462343	-	4408	protein_coding	isochorismatase domain containing 2 [Source:HGNC Symbol;Acc:HGNC:26278]	-
ENSG00000103507	36.204	45.8787	40.6192	61.6982	74.6589	79.8339	BCKDK	16	31106107	31112791	+	3873	protein_coding	branched chain keto acid dehydrogenase kinase [Source:HGNC Symbol;Acc:HGNC:16902]	-
ENSG00000162344	57.267	66.7994	55.5487	69.816	51.5539	37.4757	FGF19	11	69698238	69704022	-	1821	protein_coding	fibroblast growth factor 19 [Source:HGNC Symbol;Acc:HGNC:3675]	-
ENSG00000067182	47.6798	67.2072	57.6358	58.2896	55.983	51.6259	TNFRSF1A	12	6328757	6342114	-	4005	protein_coding	TNF receptor superfamily member 1A [Source:HGNC Symbol;Acc:HGNC:11916]	-
ENSG00000167778	46.4415	76.1281	51.542	52.9061	50.8989	59.7869	SPRYD3	12	53064316	53079404	-	3463	protein_coding	SPRY domain containing 3 [Source:HGNC Symbol;Acc:HGNC:25920]	-
ENSG00000107438	48.701	58.5486	61.3325	51.2676	57.8438	59.6512	PDLIM1	10	95237572	95291012	-	2227	protein_coding	PDZ and LIM domain 1 [Source:HGNC Symbol;Acc:HGNC:2067]	-
ENSG00000104853	43.79	44.4914	48.1767	61.0311	66.7359	72.5403	CLPTM1	19	44954585	44993341	+	5095	protein_coding	CLPTM1 regulator of GABA type A receptor forward trafficking [Source:HGNC Symbol;Acc:HGNC:2087]	-
ENSG00000116857	42.2027	91.91	46.2388	50.6232	49.799	55.1723	TMEM9	1	201134772	201171574	-	3919	protein_coding	transmembrane protein 9 [Source:HGNC Symbol;Acc:HGNC:18823]	-
ENSG00000139410	30.4224	64.5771	44.0086	57.7328	70.4192	68.6792	SDSL	12	113422380	113438276	+	2073	protein_coding	serine dehydratase like [Source:HGNC Symbol;Acc:HGNC:30404]	-
ENSG00000197982	40.5455	68.9243	49.9863	51.3864	62.3654	62.1822	C1orf122	1	37806979	37809454	+	2231	protein_coding	chromosome 1 open reading frame 122 [Source:HGNC Symbol;Acc:HGNC:24789]	-
ENSG00000132329	39.7448	62.2463	45.2487	72.3718	56.1789	59.4361	RAMP1	2	237858893	237912106	+	1147	protein_coding	receptor activity modifying protein 1 [Source:HGNC Symbol;Acc:HGNC:9843]	-
ENSG00000073169	32.3191	54.5747	40.412	55.0813	77.9629	74.6312	SELENOO	22	50200979	50217616	+	2363	protein_coding	selenoprotein O [Source:HGNC Symbol;Acc:HGNC:30395]	-
ENSG00000160447	40.307	47.503	45.2389	68.5263	65.7998	67.525	PKN3	9	128702503	128720916	+	3393	protein_coding	protein kinase N3 [Source:HGNC Symbol;Acc:HGNC:17999]	-
ENSG00000228232	39.7796	61.8059	42.1329	57.2702	64.3956	69.2284	GAPDHP1	X	39787132	39788136	-	1005	processed_pseudogene	glyceraldehyde-3-phosphate dehydrogenase pseudogene 1 [Source:HGNC Symbol;Acc:HGNC:4159]	-
ENSG00000100290	44.37	86.9934	63.9279	39.1946	50.184	49.5096	BIK	22	43110750	43129712	+	951	protein_coding	BCL2 interacting killer [Source:HGNC Symbol;Acc:HGNC:1051]	-
ENSG00000130734	41.3409	50.8128	49.9554	64.1534	65.5838	61.8835	ATG4D	19	10543895	10553418	+	2278	protein_coding	autophagy related 4D cysteine peptidase [Source:HGNC Symbol;Acc:HGNC:20789]	-
ENSG00000233426	38.1938	54.7307	46.775	60.2961	59.9541	73.5488	EIF3FP3	2	58251440	58252525	+	1086	processed_pseudogene	eukaryotic translation initiation factor 3 subunit F pseudogene 3 [Source:HGNC Symbol;Acc:HGNC:37625]	-
ENSG00000138073	51.4311	73.7415	54.9976	50.914	45.2036	56.8678	PREB	2	27130756	27134666	-	3212	protein_coding	prolactin regulatory element binding [Source:HGNC Symbol;Acc:HGNC:9356]	-
ENSG00000104341	52.4476	55.1609	50.2198	49.7244	64.238	61.1233	LAPTM4B	8	97775057	97853013	+	3197	protein_coding	lysosomal protein transmembrane 4 beta [Source:HGNC Symbol;Acc:HGNC:13646]	-
ENSG00000197019	44.8138	82.8648	51.7838	50.6604	50.3492	52.078	SERTAD1	19	40421589	40425992	-	2084	protein_coding	SERTA domain containing 1 [Source:HGNC Symbol;Acc:HGNC:17932]	-
ENSG00000125458	37.8629	55.8877	36.2051	80.5664	63.6902	58.1361	NT5C	17	75130225	75131757	-	1533	protein_coding	5', 3'-nucleotidase, cytosolic [Source:HGNC Symbol;Acc:HGNC:17144]	-
ENSG00000232346	45.348	100.867	56.3541	45.2137	28.9362	55.4322	Z74021.1	22	32039490	32039896	+	407	processed_pseudogene	ribosomal protein S17 (RPS17) pseudogene	-
ENSG00000111639	45.7652	93.7465	56.8297	57.4832	33.4143	44.573	MRPL51	12	6491886	6493841	-	1388	protein_coding	mitochondrial ribosomal protein L51 [Source:HGNC Symbol;Acc:HGNC:14044]	-
ENSG00000130193	32.5122	46.4018	43.0906	53.8612	77.1646	77.7756	THEM6	8	142727223	142736927	+	3035	protein_coding	thioesterase superfamily member 6 [Source:HGNC Symbol;Acc:HGNC:29656]	-
ENSG00000142453	42.6734	48.0183	43.2168	59.8339	64.9433	71.8893	CARM1	19	10871513	10923070	+	4455	protein_coding	coactivator associated arginine methyltransferase 1 [Source:HGNC Symbol;Acc:HGNC:23393]	-
ENSG00000087460	59.3991	48.298	59.1224	56.2544	48.3855	58.7218	GNAS	20	58839718	58911192	+	14145	protein_coding	GNAS complex locus [Source:HGNC Symbol;Acc:HGNC:4392]	-
ENSG00000118640	57.2751	101.212	59.7962	50.2016	30.8289	30.7659	VAMP8	2	85561562	85582031	+	895	protein_coding	vesicle associated membrane protein 8 [Source:HGNC Symbol;Acc:HGNC:12647]	-
ENSG00000137207	43.3571	68.1	56.216	55.3308	58.1636	48.6748	YIPF3	6	43511832	43516985	-	3043	protein_coding	Yip1 domain family member 3 [Source:HGNC Symbol;Acc:HGNC:21023]	-
ENSG00000132002	65.6109	87.803	58.6494	40.2411	30.4989	46.3964	DNAJB1	19	14514769	14529770	-	3650	protein_coding	DnaJ heat shock protein family (Hsp40) member B1 [Source:HGNC Symbol;Acc:HGNC:5270]	-
ENSG00000089248	55.2715	91.6751	56.9492	55.354	34.8001	34.8142	ERP29	12	112013348	112023449	+	3049	protein_coding	endoplasmic reticulum protein 29 [Source:HGNC Symbol;Acc:HGNC:13799]	-
ENSG00000105364	34.7189	60.197	38.8467	65.4321	62.3627	66.9395	MRPL4	19	10251901	10260055	+	4080	protein_coding	mitochondrial ribosomal protein L4 [Source:HGNC Symbol;Acc:HGNC:14276]	-
ENSG00000188910	68.255	85.8828	78.8975	34.7176	32.2905	27.7056	GJB3	1	34781214	34786369	+	2362	protein_coding	gap junction protein beta 3 [Source:HGNC Symbol;Acc:HGNC:4285]	-
ENSG00000070423	45.1915	54.0851	44.9342	63.1722	58.6804	61.6823	RNF126	19	647526	663233	-	3452	protein_coding	ring finger protein 126 [Source:HGNC Symbol;Acc:HGNC:21151]	-
ENSG00000168005	39.6025	59.6058	46.2244	60.707	55.6918	65.8923	SPINDOC	11	63813456	63827716	+	2737	protein_coding	spindlin interactor and repressor of chromatin binding [Source:HGNC Symbol;Acc:HGNC:25115]	-
ENSG00000005075	38.5531	79.4978	42.209	56.0084	50.2039	60.5506	POLR2J	7	102473118	102478907	-	1355	protein_coding	RNA polymerase II subunit J [Source:HGNC Symbol;Acc:HGNC:9197]	-
ENSG00000138107	42.6893	58.7813	46.303	55.4309	55.1896	68.334	ACTR1A	10	102461881	102502712	-	4655	protein_coding	actin related protein 1A [Source:HGNC Symbol;Acc:HGNC:167]	-
ENSG00000160813	38.8159	73.0554	46.6438	54.7968	51.3199	60.2346	PPP1R35	7	100435282	100436497	-	1119	protein_coding	protein phosphatase 1 regulatory subunit 35 [Source:HGNC Symbol;Acc:HGNC:28320]	-
ENSG00000171119	41.6359	42.8121	44.8768	55.7753	59.3681	80.2367	NRTN	19	5823802	5828324	+	1109	protein_coding	neurturin [Source:HGNC Symbol;Acc:HGNC:8007]	-
ENSG00000100162	27.9132	52.9354	40.8733	61.4039	70.0533	70.105	CENPM	22	41938737	41947152	-	1750	protein_coding	centromere protein M [Source:HGNC Symbol;Acc:HGNC:18352]	-
ENSG00000256269	38.2331	84.5897	43.774	55.7884	45.0969	53.6949	HMBS	11	119084866	119093549	+	4447	protein_coding	hydroxymethylbilane synthase [Source:HGNC Symbol;Acc:HGNC:4982]	-
ENSG00000175832	32.544	44.1531	37.4781	59.2694	75.6735	71.9785	ETV4	17	43527844	43579620	-	3515	protein_coding	ETS variant 4 [Source:HGNC Symbol;Acc:HGNC:3493]	ETS
ENSG00000177106	41.3959	53.0705	50.0469	56.1698	59.6989	59.19	EPS8L2	11	694438	727727	+	5689	protein_coding	EPS8 like 2 [Source:HGNC Symbol;Acc:HGNC:21296]	-
ENSG00000166886	41.5333	58.4261	46.7648	66.6441	55.2382	50.7671	NAB2	12	57089043	57095476	+	2861	protein_coding	NGFI-A binding protein 2 [Source:HGNC Symbol;Acc:HGNC:7627]	-
ENSG00000130881	27.1558	34.4228	33.4288	57.6128	78.9919	87.3649	LRP3	19	33177603	33208864	+	5346	protein_coding	LDL receptor related protein 3 [Source:HGNC Symbol;Acc:HGNC:6695]	-
ENSG00000103018	57.7824	80.6352	58.8808	40.6485	33.374	47.6438	CYB5B	16	69424525	69466266	+	6903	protein_coding	cytochrome b5 type B [Source:HGNC Symbol;Acc:HGNC:24374]	-
ENSG00000149541	36.9847	48.9053	39.9482	51.0331	65.7269	75.974	B3GAT3	11	62615296	62622154	-	2407	protein_coding	beta-1,3-glucuronyltransferase 3 [Source:HGNC Symbol;Acc:HGNC:923]	-
ENSG00000142632	35.5186	45.5416	38.8137	66.9655	69.4647	62.1299	ARHGEF19	1	16197854	16212652	-	3788	protein_coding	Rho guanine nucleotide exchange factor 19 [Source:HGNC Symbol;Acc:HGNC:26604]	-
ENSG00000130159	32.0966	63.9688	40.0499	59.0043	63.7967	59.3841	ECSIT	19	11505929	11529172	-	2355	protein_coding	ECSIT signalling integrator [Source:HGNC Symbol;Acc:HGNC:29548]	-
ENSG00000107872	25.7551	60.4722	41.0801	48.7192	70.2041	72.0104	FBXL15	10	102419189	102423136	+	2593	protein_coding	F-box and leucine rich repeat protein 15 [Source:HGNC Symbol;Acc:HGNC:28155]	-
ENSG00000145050	75.188	112.986	67.9799	23.9254	15.8097	21.6517	MANF	3	51385291	51389397	+	2139	protein_coding	mesencephalic astrocyte derived neurotrophic factor [Source:HGNC Symbol;Acc:HGNC:15461]	-
ENSG00000176393	41.4336	45.049	48.4698	62.3786	58.0776	61.1015	RNPEP	1	201982372	202006147	+	3455	protein_coding	arginyl aminopeptidase [Source:HGNC Symbol;Acc:HGNC:10078]	-
ENSG00000105254	41.3774	85.3562	47.425	50.7736	42.3975	47.9217	TBCB	19	36114289	36125947	+	3373	protein_coding	tubulin folding cofactor B [Source:HGNC Symbol;Acc:HGNC:1989]	-
ENSG00000103152	33.7279	62.5418	38.8589	62.0254	63.7116	53.9513	MPG	16	77007	85853	+	1661	protein_coding	N-methylpurine DNA glycosylase [Source:HGNC Symbol;Acc:HGNC:7211]	-
ENSG00000170638	45.6918	58.3932	53.9983	54.082	51.2431	51.3099	TRABD	22	50185915	50199598	+	3153	protein_coding	TraB domain containing [Source:HGNC Symbol;Acc:HGNC:28805]	-
ENSG00000173141	36.7124	74.0183	42.6001	55.7315	47.9188	57.2631	MRPL57	13	21176658	21179084	+	2233	protein_coding	mitochondrial ribosomal protein L57 [Source:HGNC Symbol;Acc:HGNC:14514]	-
ENSG00000130202	50.3686	48.7488	60.7633	53.6638	48.3178	52.09	NECTIN2	19	44846175	44889223	+	3742	protein_coding	nectin cell adhesion molecule 2 [Source:HGNC Symbol;Acc:HGNC:9707]	-
ENSG00000136807	45.0773	60.4078	51.129	51.0018	52.0499	54.2799	CDK9	9	127785679	127790792	+	3005	protein_coding	cyclin dependent kinase 9 [Source:HGNC Symbol;Acc:HGNC:1780]	-
ENSG00000075785	66.1539	62.4752	60.7153	44.1722	39.0318	40.306	RAB7A	3	128726122	128814796	+	2717	protein_coding	RAB7A, member RAS oncogene family [Source:HGNC Symbol;Acc:HGNC:9788]	-
ENSG00000111674	42.732	48.6358	47.3431	55.2376	57.116	61.5216	ENO2	12	6913745	6923698	+	4281	protein_coding	enolase 2 [Source:HGNC Symbol;Acc:HGNC:3353]	-
ENSG00000131473	56.0137	39.2763	47.0891	51.8276	49.4586	67.7913	ACLY	17	41866917	41930542	-	5208	protein_coding	ATP citrate lyase [Source:HGNC Symbol;Acc:HGNC:115]	-
ENSG00000179010	62.5403	54.1524	54.2419	49.8329	42.7103	47.5544	MRFAP1	4	6640091	6642745	+	2655	protein_coding	Morf4 family associated protein 1 [Source:HGNC Symbol;Acc:HGNC:24549]	-
ENSG00000113732	48.2344	96.4008	59.9893	31.6811	32.5194	41.9345	ATP6V0E1	5	172983771	173035445	+	1609	protein_coding	ATPase H+ transporting V0 subunit e1 [Source:HGNC Symbol;Acc:HGNC:863]	-
ENSG00000106803	51.8937	87.6216	51.8058	44.5515	30.9397	43.8123	SEC61B	9	99222064	99230615	+	1209	protein_coding	SEC61 translocon beta subunit [Source:HGNC Symbol;Acc:HGNC:16993]	-
ENSG00000226976	42.8856	90.0569	50.5682	61.2586	26.3411	39.2788	COX6A1P2	6	37044860	37045189	+	330	processed_pseudogene	cytochrome c oxidase subunit 6A1 pseudogene 2 [Source:HGNC Symbol;Acc:HGNC:35239]	-
ENSG00000104872	41.3509	76.412	47.8465	57.6439	41.0633	46.0649	PIH1D1	19	49446298	49453497	-	3331	protein_coding	PIH1 domain containing 1 [Source:HGNC Symbol;Acc:HGNC:26075]	-
ENSG00000134287	38.5522	51.2376	38.7664	53.723	62.8271	64.4887	ARF3	12	48935723	48957487	-	4938	protein_coding	ADP ribosylation factor 3 [Source:HGNC Symbol;Acc:HGNC:654]	-
ENSG00000158747	39.5007	47.328	47.019	59.0923	55.2701	61.2776	NBL1	1	19596979	19658456	+	3596	protein_coding	NBL1, DAN family BMP antagonist [Source:HGNC Symbol;Acc:HGNC:7650]	-
ENSG00000132471	45.673	48.0693	47.2886	56.3755	52.4559	59.3846	WBP2	17	75845699	75856507	-	5399	protein_coding	WW domain binding protein 2 [Source:HGNC Symbol;Acc:HGNC:12738]	-
ENSG00000204673	28.0333	32.1701	30.9199	63.2974	73.0119	81.1786	AKT1S1	19	49869033	49878459	-	5737	protein_coding	AKT1 substrate 1 [Source:HGNC Symbol;Acc:HGNC:28426]	-
ENSG00000099875	45.0566	46.4775	45.254	63.8417	51.8382	55.9339	MKNK2	19	2037465	2051244	-	5221	protein_coding	MAPK interacting serine/threonine kinase 2 [Source:HGNC Symbol;Acc:HGNC:7111]	-
ENSG00000116096	41.5998	63.2309	42.5045	53.7561	41.9646	65.1633	SPR	2	72887382	72892158	+	1458	protein_coding	sepiapterin reductase [Source:HGNC Symbol;Acc:HGNC:11257]	-
ENSG00000160867	30.7785	42.5818	37.0928	59.2577	63.9627	74.2601	FGFR4	5	177086905	177098144	+	4810	protein_coding	fibroblast growth factor receptor 4 [Source:HGNC Symbol;Acc:HGNC:3691]	-
ENSG00000148335	28.0551	58.0141	36.2348	57.582	59.5248	68.4689	NTMT1	9	129608884	129636131	+	3029	protein_coding	N-terminal Xaa-Pro-Lys N-methyltransferase 1 [Source:HGNC Symbol;Acc:HGNC:23373]	-
ENSG00000128016	65.1848	53.8364	60.0829	49.9965	39.5065	39.252	ZFP36	19	39406847	39409412	+	1976	protein_coding	ZFP36 ring finger protein [Source:HGNC Symbol;Acc:HGNC:12862]	-
ENSG00000184117	48.405	94.9899	54.7344	39.6254	33.1072	36.9233	NIPSNAP1	22	29554808	29581327	-	2983	protein_coding	nipsnap homolog 1 [Source:HGNC Symbol;Acc:HGNC:7827]	-
ENSG00000136238	55.6455	43.2121	52.1232	51.3237	50.8348	54.1534	RAC1	7	6374527	6403967	+	3100	protein_coding	Rac family small GTPase 1 [Source:HGNC Symbol;Acc:HGNC:9801]	-
ENSG00000164896	31.0234	47.9651	38.4857	51.3103	73.1338	65.2773	FASTK	7	151076593	151080866	-	3805	protein_coding	Fas activated serine/threonine kinase [Source:HGNC Symbol;Acc:HGNC:24676]	-
ENSG00000213178	43.9027	81.4094	57.7347	57.9874	28.5877	36.9123	RPL22P1	3	169483671	169484080	-	410	processed_pseudogene	ribosomal protein L22 pseudogene 1 [Source:HGNC Symbol;Acc:HGNC:17998]	-
ENSG00000092621	41.5563	69.4154	50.0244	59.8667	47.0699	38.0009	PHGDH	1	119648411	119744226	+	9217	protein_coding	phosphoglycerate dehydrogenase [Source:HGNC Symbol;Acc:HGNC:8923]	-
ENSG00000168496	61.3308	69.5125	58.1952	39.5386	30.643	46.6356	FEN1	11	61792911	61797238	+	2198	protein_coding	flap structure-specific endonuclease 1 [Source:HGNC Symbol;Acc:HGNC:3650]	-
ENSG00000087074	78.8571	80.685	77.1349	34.2486	19.3585	15.0417	PPP1R15A	19	48872421	48876058	+	3065	protein_coding	protein phosphatase 1 regulatory subunit 15A [Source:HGNC Symbol;Acc:HGNC:14375]	-
ENSG00000108262	36.0405	43.3637	41.29	56.7796	63.8339	63.9226	GIT1	17	29573469	29594054	-	5635	protein_coding	GIT ArfGAP 1 [Source:HGNC Symbol;Acc:HGNC:4272]	-
ENSG00000176946	38.3406	54.1848	50.7076	56.0141	47.4019	57.9704	THAP4	2	241584405	241637158	-	2856	protein_coding	THAP domain containing 4 [Source:HGNC Symbol;Acc:HGNC:23187]	THAP
ENSG00000169683	28.6538	37.6749	33.8491	62.4819	73.3116	68.5287	LRRC45	17	82023305	82031151	+	3603	protein_coding	leucine rich repeat containing 45 [Source:HGNC Symbol;Acc:HGNC:28302]	-
ENSG00000122971	29.3218	57.3991	40.0955	57.4301	61.1754	59.0275	ACADS	12	120725774	120740008	+	2609	protein_coding	acyl-CoA dehydrogenase short chain [Source:HGNC Symbol;Acc:HGNC:90]	-
ENSG00000085998	32.3086	70.2544	39.2094	54.6812	53.5892	54.1817	POMGNT1	1	46188682	46220305	-	6189	protein_coding	protein O-linked mannose N-acetylglucosaminyltransferase 1 (beta 1,2-) [Source:HGNC Symbol;Acc:HGNC:19139]	-
ENSG00000077152	46.1894	79.5755	63.1003	40.6541	27.09	46.611	UBE2T	1	202331657	202341980	-	1652	protein_coding	ubiquitin conjugating enzyme E2 T [Source:HGNC Symbol;Acc:HGNC:25009]	-
ENSG00000182054	40.5351	67.0135	51.6212	51.7905	43.9441	48.2039	IDH2	15	90083045	90102504	-	2814	protein_coding	isocitrate dehydrogenase (NADP(+)) 2, mitochondrial [Source:HGNC Symbol;Acc:HGNC:5383]	-
ENSG00000068120	41.764	53.388	46.2739	54.0349	48.0556	59.013	COASY	17	42561467	42566277	+	4032	protein_coding	Coenzyme A synthase [Source:HGNC Symbol;Acc:HGNC:29932]	-
ENSG00000184281	31.1741	61.3207	39.4245	50.7177	58.3378	61.0269	TSSC4	11	2400488	2403878	+	2659	protein_coding	tumor suppressing subtransferable candidate 4 [Source:HGNC Symbol;Acc:HGNC:12386]	-
ENSG00000006015	32.5121	58.8438	37.6292	60.8431	52.3368	59.7527	REX1BD	19	18588685	18592336	+	3370	protein_coding	required for excision 1-B domain containing [Source:HGNC Symbol;Acc:HGNC:26098]	-
ENSG00000149782	33.5811	33.2604	31.3216	72.0718	59.8657	71.1235	PLCB3	11	64251523	64269150	+	4964	protein_coding	phospholipase C beta 3 [Source:HGNC Symbol;Acc:HGNC:9056]	-
ENSG00000099783	51.7653	38.7886	47.2454	51.0463	51.9754	60.3427	HNRNPM	19	8444767	8489114	+	5614	protein_coding	heterogeneous nuclear ribonucleoprotein M [Source:HGNC Symbol;Acc:HGNC:5046]	-
ENSG00000100216	48.6892	84.2148	54.3432	44.3223	24.468	44.794	TOMM22	22	38681957	38685421	+	2182	protein_coding	translocase of outer mitochondrial membrane 22 [Source:HGNC Symbol;Acc:HGNC:18002]	-
ENSG00000171302	50.9118	73.5237	54.179	39.7617	37.7678	44.5234	CANT1	17	78991716	79009867	-	4422	protein_coding	calcium activated nucleotidase 1 [Source:HGNC Symbol;Acc:HGNC:19721]	-
ENSG00000104964	40.1056	57.6778	38.9073	57.4249	50.365	56.1657	TLE5	19	3052910	3063107	-	5298	protein_coding	TLE family member 5, transcriptional modulator [Source:HGNC Symbol;Acc:HGNC:307]	-
ENSG00000126756	40.0388	100.048	57.4031	42.7723	26.4433	33.9239	UXT	X	47651796	47659180	-	1264	protein_coding	ubiquitously expressed prefoldin like chaperone [Source:HGNC Symbol;Acc:HGNC:12641]	-
ENSG00000111652	46.571	76.5501	44.0561	44.6949	39.7109	48.9715	COPS7A	12	6724014	6731875	+	2840	protein_coding	COP9 signalosome subunit 7A [Source:HGNC Symbol;Acc:HGNC:16758]	-
ENSG00000212864	26.8811	28.2482	29.8527	60.0941	66.2244	89.1348	RNF208	9	137220247	137221581	-	1150	protein_coding	ring finger protein 208 [Source:HGNC Symbol;Acc:HGNC:25420]	-
ENSG00000101000	44.5034	90.4552	56.4886	38.7449	30.4034	38.3148	PROCR	20	35172072	35216240	+	1697	protein_coding	protein C receptor [Source:HGNC Symbol;Acc:HGNC:9452]	-
ENSG00000068697	56.5699	88.7261	58.0592	30.5828	31.8494	33.0837	LAPTM4A	2	20032650	20051628	-	1546	protein_coding	lysosomal protein transmembrane 4 alpha [Source:HGNC Symbol;Acc:HGNC:6924]	-
ENSG00000170779	59.0637	86.8759	59.3391	35.9945	27.674	29.7375	CDCA4	14	105009573	105021083	-	2448	protein_coding	cell division cycle associated 4 [Source:HGNC Symbol;Acc:HGNC:14625]	-
ENSG00000076604	35.0262	51.8924	44.1915	49.4048	55.7622	62.1438	TRAF4	17	28744005	28750956	+	4573	protein_coding	TNF receptor associated factor 4 [Source:HGNC Symbol;Acc:HGNC:12034]	-
ENSG00000123064	37.3096	46.6143	40.4439	55.6753	55.4609	62.7596	DDX54	12	113157174	113185479	-	5064	protein_coding	DEAD-box helicase 54 [Source:HGNC Symbol;Acc:HGNC:20084]	-
ENSG00000132254	39.9017	85.5998	49.9591	44.0994	35.0612	41.733	ARFIP2	11	6474683	6481479	-	5312	protein_coding	ADP ribosylation factor interacting protein 2 [Source:HGNC Symbol;Acc:HGNC:17160]	-
ENSG00000144381	54.0344	34.2004	40.0106	40.3485	76.9465	50.3693	HSPD1	2	197486584	197516737	-	4123	protein_coding	heat shock protein family D (Hsp60) member 1 [Source:HGNC Symbol;Acc:HGNC:5261]	-
ENSG00000164104	62.0941	64.6018	67.8489	46.3494	26.7676	26.6136	HMGB2	4	173331376	173334432	-	2401	protein_coding	high mobility group box 2 [Source:HGNC Symbol;Acc:HGNC:5000]	HMG
ENSG00000090971	30.2856	47.6668	33.2834	55.7918	64.8942	62.3114	NAT14	19	55485188	55487568	+	1979	protein_coding	N-acetyltransferase 14 (putative) [Source:HGNC Symbol;Acc:HGNC:28918]	-
ENSG00000103266	33.1435	51.784	33.6486	59.2798	56.202	59.8786	STUB1	16	680224	682870	+	2318	protein_coding	STIP1 homology and U-box containing protein 1 [Source:HGNC Symbol;Acc:HGNC:11427]	-
ENSG00000172893	43.1911	55.4353	40.4676	45.1719	51.9424	57.1467	DHCR7	11	71428193	71452868	-	4160	protein_coding	7-dehydrocholesterol reductase [Source:HGNC Symbol;Acc:HGNC:2860]	-
ENSG00000164054	38.5378	45.1586	45.2837	50.3992	54.6983	59.2187	SHISA5	3	48467798	48504826	-	4664	protein_coding	shisa family member 5 [Source:HGNC Symbol;Acc:HGNC:30376]	-
ENSG00000178449	35.3655	102.954	51.4592	47.6355	21.7386	33.949	COX14	12	50112082	50120457	+	970	protein_coding	cytochrome c oxidase assembly factor COX14 [Source:HGNC Symbol;Acc:HGNC:28216]	-
ENSG00000164258	33.5533	83.5442	56.4812	44.5639	39.5051	35.4502	NDUFS4	5	53560633	53683338	+	1174	protein_coding	NADH:ubiquinone oxidoreductase subunit S4 [Source:HGNC Symbol;Acc:HGNC:7711]	-
ENSG00000136908	31.4328	45.2922	40.8042	55.3276	61.1289	59.1068	DPM2	9	127935099	127938484	-	3133	protein_coding	dolichyl-phosphate mannosyltransferase subunit 2, regulatory [Source:HGNC Symbol;Acc:HGNC:3006]	-
ENSG00000198856	52.7069	84.1096	66.5076	32.3335	25.4031	31.8674	OSTC	4	108650585	108667820	+	1616	protein_coding	oligosaccharyltransferase complex non-catalytic subunit [Source:HGNC Symbol;Acc:HGNC:24448]	-
ENSG00000048140	34.4785	62.3265	40.0904	46.2976	53.3604	56.2401	TSPAN17	5	176647387	176659054	+	5215	protein_coding	tetraspanin 17 [Source:HGNC Symbol;Acc:HGNC:13594]	-
ENSG00000037241	37.1472	74.2947	50.4614	48.2356	33.7739	48.5158	RPL26L1	5	172958729	172969771	+	1164	protein_coding	ribosomal protein L26 like 1 [Source:HGNC Symbol;Acc:HGNC:17050]	-
ENSG00000167004	63.8272	39.0093	51.569	43.9463	46.608	47.2743	PDIA3	15	43746410	43773278	+	4221	protein_coding	protein disulfide isomerase family A member 3 [Source:HGNC Symbol;Acc:HGNC:4606]	-
ENSG00000148341	30.9148	57.825	40.1874	47.2903	62.4513	53.4587	SH3GLB2	9	129007036	129028303	-	6814	protein_coding	SH3 domain containing GRB2 like, endophilin B2 [Source:HGNC Symbol;Acc:HGNC:10834]	-
ENSG00000131475	39.5235	81.4819	44.9196	39.4649	37.3639	49.0836	VPS25	17	42773449	42779599	+	2391	protein_coding	vacuolar protein sorting 25 homolog [Source:HGNC Symbol;Acc:HGNC:28122]	-
ENSG00000254531	26.2522	54.79	39.7343	70.306	51.4668	49.2228	AP001816.1	4	101347780	101348883	+	790	lncRNA	novel transcript	-
ENSG00000173020	37.4098	45.8665	42.8474	52.7966	54.9343	57.8922	GRK2	11	67266473	67286556	+	6602	protein_coding	G protein-coupled receptor kinase 2 [Source:HGNC Symbol;Acc:HGNC:289]	-
ENSG00000203879	39.6568	43.5701	40.463	54.0632	54.1712	59.6272	GDI1	X	154436913	154443467	+	5256	protein_coding	GDP dissociation inhibitor 1 [Source:HGNC Symbol;Acc:HGNC:4226]	-
ENSG00000172301	35.8485	56.4338	39.8219	52.6959	44.1247	61.6815	COPRS	17	31851871	31859291	-	1379	protein_coding	coordinator of PRMT5 and differentiation stimulator [Source:HGNC Symbol;Acc:HGNC:28848]	-
ENSG00000116133	56.2653	65.0025	51.7692	34.7691	34.2497	48.1682	DHCR24	1	54849627	54887195	-	6214	protein_coding	24-dehydrocholesterol reductase [Source:HGNC Symbol;Acc:HGNC:2859]	-
ENSG00000010292	47.1342	35.4913	42.7104	53.1887	46.3991	65.0402	NCAPD2	12	6493356	6531955	+	6470	protein_coding	non-SMC condensin I complex subunit D2 [Source:HGNC Symbol;Acc:HGNC:24305]	-
ENSG00000102996	40.37	43.4099	45.4527	53.5887	46.7364	59.8806	MMP15	16	58025754	58046901	+	4231	protein_coding	matrix metallopeptidase 15 [Source:HGNC Symbol;Acc:HGNC:7161]	-
ENSG00000235173	26.7631	30.5406	29.4888	51.33	64.9999	86.3065	HGH1	8	144137774	144140851	+	2817	protein_coding	HGH1 homolog [Source:HGNC Symbol;Acc:HGNC:24161]	-
novel.610	31.8263	113.826	40.4112	32.7743	32.7513	37.795	-	CHR_HSCHR17_7_CTG4	38553422	38565019	+	875	-	- && P49720.2 RecName: Full=Proteasome subunit beta type-3; AltName: Full=Proteasome chain 13; AltName: Full=Proteasome component C10-II; AltName: Full=Proteasome theta chain && PF00227:Proteasome subunit	Proteasome
ENSG00000163882	42.0412	83.0614	51.6649	38.6184	32.9962	40.8452	POLR2H	3	184361718	184368596	+	3146	protein_coding	RNA polymerase II subunit H [Source:HGNC Symbol;Acc:HGNC:9195]	-
ENSG00000116663	43.6038	68.3102	45.9722	44.6705	38.7234	47.9349	FBXO6	1	11664200	11674354	+	1735	protein_coding	F-box protein 6 [Source:HGNC Symbol;Acc:HGNC:13585]	-
ENSG00000196961	33.101	38.184	38.404	54.5747	62.1278	62.3583	AP2A1	19	49766968	49807113	+	8746	protein_coding	adaptor related protein complex 2 subunit alpha 1 [Source:HGNC Symbol;Acc:HGNC:561]	-
ENSG00000110697	29.4401	36.8232	33.2875	63.5221	68.1992	57.2418	PITPNM1	11	67491768	67506263	-	6442	protein_coding	phosphatidylinositol transfer protein membrane associated 1 [Source:HGNC Symbol;Acc:HGNC:9003]	-
ENSG00000182481	47.4992	26.4153	41.086	39.8022	65.696	67.9368	KPNA2	17	68035708	68046854	+	2963	protein_coding	karyopherin subunit alpha 2 [Source:HGNC Symbol;Acc:HGNC:6395]	-
ENSG00000226278	28.2361	78.6456	56.8953	36.5395	32.6602	55.3003	PSPHP1	7	55764797	55773288	+	261	unprocessed_pseudogene	phosphoserine phosphatase pseudogene 1 [Source:HGNC Symbol;Acc:HGNC:9578]	-
ENSG00000002834	46.2648	44.8061	45.6113	48.9461	44.4932	58.1477	LASP1	17	38869859	38921770	+	7061	protein_coding	LIM and SH3 protein 1 [Source:HGNC Symbol;Acc:HGNC:6513]	-
ENSG00000102898	38.7539	49.1044	42.8496	50.0078	48.7227	58.6775	NUTF2	16	67846923	67872567	+	3704	protein_coding	nuclear transport factor 2 [Source:HGNC Symbol;Acc:HGNC:13722]	-
ENSG00000110958	62.6851	48.7057	57.0976	32.8788	44.5811	41.8658	PTGES3	12	56663341	56688408	-	3399	protein_coding	prostaglandin E synthase 3 [Source:HGNC Symbol;Acc:HGNC:16049]	-
ENSG00000120885	55.3599	57.0689	61.3604	40.9695	34.6212	37.8696	CLU	8	27596917	27614700	-	6285	protein_coding	clusterin [Source:HGNC Symbol;Acc:HGNC:2095]	-
ENSG00000162517	38.8138	65.9205	46.9254	42.2963	41.7013	51.1855	PEF1	1	31629866	31644896	-	2223	protein_coding	penta-EF-hand domain containing 1 [Source:HGNC Symbol;Acc:HGNC:30009]	-
ENSG00000125877	37.7471	66.8193	43.8354	43.644	39.3318	55.1644	ITPA	20	3208868	3223870	+	1942	protein_coding	inosine triphosphatase [Source:HGNC Symbol;Acc:HGNC:6176]	-
ENSG00000167114	35.1235	37.7269	36.9956	51.166	59.3289	66.1592	SLC27A4	9	128340527	128361470	+	3229	protein_coding	solute carrier family 27 member 4 [Source:HGNC Symbol;Acc:HGNC:10998]	-
ENSG00000112118	49.2578	43.3863	46.9718	49.2695	42.557	54.8986	MCM3	6	52264014	52284881	-	3645	protein_coding	minichromosome maintenance complex component 3 [Source:HGNC Symbol;Acc:HGNC:6945]	-
ENSG00000141002	36.9597	62.2602	38.8835	49.9805	47.1272	51.0251	TCF25	16	89873570	89913627	+	7967	protein_coding	transcription factor 25 [Source:HGNC Symbol;Acc:HGNC:29181]	-
ENSG00000158042	47.6899	94.4732	56.3451	41.4997	16.9188	29.2116	MRPL17	11	6680385	6683340	-	2612	protein_coding	mitochondrial ribosomal protein L17 [Source:HGNC Symbol;Acc:HGNC:14053]	-
ENSG00000125734	35.6841	72.6075	45.9429	44.4183	47.1619	39.6664	GPR108	19	6729914	6737603	-	3213	protein_coding	G protein-coupled receptor 108 [Source:HGNC Symbol;Acc:HGNC:17829]	-
ENSG00000165233	32.355	82.1801	39.5473	39.3549	43.3254	48.5135	CARD19	9	93096217	93113283	+	3082	protein_coding	caspase recruitment domain family member 19 [Source:HGNC Symbol;Acc:HGNC:28148]	-
ENSG00000120738	67.671	36.6712	59.148	43.0752	37.149	40.404	EGR1	5	138465479	138469303	+	3137	protein_coding	early growth response 1 [Source:HGNC Symbol;Acc:HGNC:3238]	zf-C2H2
ENSG00000069011	32.4194	40.0594	40.2593	51.5314	51.3723	66.9301	PITX1	5	135027734	135034813	-	3442	protein_coding	paired like homeodomain 1 [Source:HGNC Symbol;Acc:HGNC:9004]	Homeobox
ENSG00000183751	28.2253	35.0138	35.8427	47.8963	65.5343	69.6024	TBL3	16	1972053	1982929	+	7119	protein_coding	transducin beta like 3 [Source:HGNC Symbol;Acc:HGNC:11587]	-
ENSG00000197345	31.974	72.0599	44.4982	45.3839	36.1897	51.7613	MRPL21	11	68891276	68903835	-	2825	protein_coding	mitochondrial ribosomal protein L21 [Source:HGNC Symbol;Acc:HGNC:14479]	-
ENSG00000114956	42.8958	70.8445	51.0803	41.1733	35.4987	40.2091	DGUOK	2	73926826	73958961	+	1455	protein_coding	deoxyguanosine kinase [Source:HGNC Symbol;Acc:HGNC:2858]	-
ENSG00000116691	30.6554	50.8077	41.3039	41.1391	60.1167	57.1498	MIIP	1	12019466	12032045	+	2821	protein_coding	migration and invasion inhibitory protein [Source:HGNC Symbol;Acc:HGNC:25715]	-
ENSG00000205250	39.6276	50.9514	46.7532	41.9473	43.8699	57.2444	E2F4	16	67192155	67198918	+	3596	protein_coding	E2F transcription factor 4 [Source:HGNC Symbol;Acc:HGNC:3118]	E2F
ENSG00000142910	43.0875	66.7356	57.2403	45.1086	35.3626	32.2928	TINAGL1	1	31576485	31587686	+	5281	protein_coding	tubulointerstitial nephritis antigen like 1 [Source:HGNC Symbol;Acc:HGNC:19168]	-
ENSG00000064545	34.2885	45.8876	36.2973	56.6187	53.5514	52.7676	TMEM161A	19	19119169	19138513	-	3281	protein_coding	transmembrane protein 161A [Source:HGNC Symbol;Acc:HGNC:26020]	-
ENSG00000262814	35.6145	41.4828	31.1101	66.8943	46.7435	57.5658	MRPL12	17	81703367	81707517	+	1009	protein_coding	mitochondrial ribosomal protein L12 [Source:HGNC Symbol;Acc:HGNC:10378]	-
ENSG00000004478	43.6175	50.5777	38.7571	44.9948	38.0065	62.7911	FKBP4	12	2794970	2805423	+	5163	protein_coding	FKBP prolyl isomerase 4 [Source:HGNC Symbol;Acc:HGNC:3720]	-
ENSG00000122861	62.2986	76.747	76.5794	28.5586	18.8078	15.6571	PLAU	10	73909177	73917496	+	2949	protein_coding	plasminogen activator, urokinase [Source:HGNC Symbol;Acc:HGNC:9052]	-
ENSG00000127824	31.836	47.1881	40.853	37.2719	48.5442	72.6619	TUBA4A	2	219249710	219278170	-	3966	protein_coding	tubulin alpha 4a [Source:HGNC Symbol;Acc:HGNC:12407]	-
ENSG00000156411	28.3215	78.1128	42.967	39.1163	41.4491	48.153	ATP5MPL	14	103912288	103928269	-	3415	protein_coding	ATP synthase membrane subunit 6.8PL [Source:HGNC Symbol;Acc:HGNC:1188]	-
ENSG00000165119	58.5104	42.5646	46.0413	40.1118	48.6183	42.1902	HNRNPK	9	83968083	83980616	-	5095	protein_coding	heterogeneous nuclear ribonucleoprotein K [Source:HGNC Symbol;Acc:HGNC:5044]	-
ENSG00000175203	46.6747	69.987	48.2011	39.5287	32.8082	40.6898	DCTN2	12	57530102	57547331	-	4217	protein_coding	dynactin subunit 2 [Source:HGNC Symbol;Acc:HGNC:2712]	-
ENSG00000105722	40.2798	47.6395	41.1305	50.8892	44.9987	52.4898	ERF	19	42247569	42255128	-	3269	protein_coding	ETS2 repressor factor [Source:HGNC Symbol;Acc:HGNC:3444]	ETS
ENSG00000135617	31.8192	78.0581	38.9557	41.4252	35.9494	50.4028	PRADC1	2	73228010	73233239	-	1404	protein_coding	protease associated domain containing 1 [Source:HGNC Symbol;Acc:HGNC:16047]	-
ENSG00000105447	31.1427	43.695	35.313	41.0339	52.6028	72.3062	GRWD1	19	48445841	48457022	+	5627	protein_coding	glutamate rich WD repeat containing 1 [Source:HGNC Symbol;Acc:HGNC:21270]	-
ENSG00000142409	36.7315	48.3757	41.7226	47.938	50.0409	50.9995	ZNF787	19	56087366	56121295	-	3686	protein_coding	zinc finger protein 787 [Source:HGNC Symbol;Acc:HGNC:26998]	zf-C2H2
ENSG00000101335	32.8412	36.995	34.7669	58.8133	59.656	52.5487	MYL9	20	36541497	36551447	+	2808	protein_coding	myosin light chain 9 [Source:HGNC Symbol;Acc:HGNC:15754]	-
ENSG00000142173	39.2404	42.2707	45.4545	53.1886	50.1795	44.894	COL6A2	21	46098097	46132849	+	5350	protein_coding	collagen type VI alpha 2 chain [Source:HGNC Symbol;Acc:HGNC:2212]	-
ENSG00000226415	31.8263	52.3574	37.3447	55.5194	43.3694	54.6507	TPI1P1	1	76699789	76700538	+	750	processed_pseudogene	triosephosphate isomerase 1 pseudogene 1 [Source:HGNC Symbol;Acc:HGNC:35449]	-
ENSG00000147065	54.2047	40.4862	46.1315	42.044	39.7167	52.2064	MSN	X	65588377	65741931	+	5987	protein_coding	moesin [Source:HGNC Symbol;Acc:HGNC:7373]	-
ENSG00000135519	27.3288	35.0551	35.3668	58.1978	57.0041	61.6029	KCNH3	12	49539030	49558337	+	4496	protein_coding	potassium voltage-gated channel subfamily H member 3 [Source:HGNC Symbol;Acc:HGNC:6252]	-
ENSG00000128340	39.5753	40.7495	44.8713	51.5882	46.6342	50.7645	RAC2	22	37225270	37244448	-	2523	protein_coding	Rac family small GTPase 2 [Source:HGNC Symbol;Acc:HGNC:9802]	-
ENSG00000141698	41.8162	71.528	47.1093	47.043	28.6602	37.8464	NT5C3B	17	41825057	41836260	-	2851	protein_coding	5'-nucleotidase, cytosolic IIIB [Source:HGNC Symbol;Acc:HGNC:28300]	-
ENSG00000171603	46.0874	37.2969	43.1145	54.6219	41.0518	51.8306	CLSTN1	1	9729026	9824526	-	5683	protein_coding	calsyntenin 1 [Source:HGNC Symbol;Acc:HGNC:17447]	-
ENSG00000087088	33.5291	47.9863	36.714	52.5965	49.686	53.4086	BAX	19	48954815	48961798	+	2587	protein_coding	BCL2 associated X, apoptosis regulator [Source:HGNC Symbol;Acc:HGNC:959]	-
ENSG00000105700	40.4756	61.2261	44.1043	41.6323	38.6512	47.7266	KXD1	19	18557762	18569387	+	4112	protein_coding	KxDL motif containing 1 [Source:HGNC Symbol;Acc:HGNC:28420]	-
ENSG00000096433	45.3551	41.7293	45.4188	50.4827	39.3136	51.1325	ITPR3	6	33620365	33696574	+	9870	protein_coding	inositol 1,4,5-trisphosphate receptor type 3 [Source:HGNC Symbol;Acc:HGNC:6182]	-
ENSG00000030110	30.3681	58.4615	43.3701	41.444	44.5708	55.0194	BAK1	6	33572547	33580293	-	2212	protein_coding	BCL2 antagonist/killer 1 [Source:HGNC Symbol;Acc:HGNC:949]	-
ENSG00000125657	47.9754	48.6099	47.5091	42.5405	36.1747	50.3404	TNFSF9	19	6531026	6535924	+	1634	protein_coding	TNF superfamily member 9 [Source:HGNC Symbol;Acc:HGNC:11939]	-
ENSG00000257704	32.1036	43.0804	36.888	56.9944	61.9632	42.0056	INAFM1	19	47274885	47275723	+	839	protein_coding	InaF motif containing 1 [Source:HGNC Symbol;Acc:HGNC:27406]	-
ENSG00000106263	51.4843	53.1997	50.3293	38.5187	30.5011	48.7671	EIF3B	7	2354086	2380745	+	9037	protein_coding	eukaryotic translation initiation factor 3 subunit B [Source:HGNC Symbol;Acc:HGNC:3280]	-
ENSG00000140995	30.6767	60.1133	36.0007	47.6313	45.3347	52.4767	DEF8	16	89947925	89968060	+	6565	protein_coding	differentially expressed in FDCP 8 homolog [Source:HGNC Symbol;Acc:HGNC:25969]	-
ENSG00000091947	34.0407	68.5032	43.4915	40.4205	43.4911	42.0528	TMEM101	17	44011188	44023946	-	3029	protein_coding	transmembrane protein 101 [Source:HGNC Symbol;Acc:HGNC:28653]	-
ENSG00000136463	38.1404	68.299	41.0781	46.0363	31.3859	45.9602	TACO1	17	63600882	63608365	+	2305	protein_coding	translational activator of cytochrome c oxidase I [Source:HGNC Symbol;Acc:HGNC:24316]	-
ENSG00000170604	33.0207	37.3324	35.19	56.453	51.6105	56.9865	IRF2BP1	19	45883608	45886141	-	2534	protein_coding	interferon regulatory factor 2 binding protein 1 [Source:HGNC Symbol;Acc:HGNC:21728]	-
ENSG00000105755	27.8509	62.4158	32.8266	41.648	55.1287	50.4115	ETHE1	19	43506719	43527230	-	1590	protein_coding	ETHE1 persulfide dioxygenase [Source:HGNC Symbol;Acc:HGNC:23287]	-
ENSG00000102178	40.2197	69.9755	42.1951	36.6188	34.2367	46.9367	UBL4A	X	154483717	154486615	-	2575	protein_coding	ubiquitin like 4A [Source:HGNC Symbol;Acc:HGNC:12505]	-
ENSG00000136718	35.0497	58.5494	35.0144	49.3659	39.4935	52.6984	IMP4	2	130342225	130347810	+	3861	protein_coding	IMP U3 small nucleolar ribonucleoprotein 4 [Source:HGNC Symbol;Acc:HGNC:30856]	-
ENSG00000146109	39.3789	85.6673	45.237	36.2617	28.5836	35.0206	ABT1	6	26596953	26600739	+	2943	protein_coding	activator of basal transcription 1 [Source:HGNC Symbol;Acc:HGNC:17369]	-
ENSG00000168101	27.9099	43.1124	32.6686	49.0064	52.4472	64.8135	NUDT16L1	16	4693694	4695859	+	2068	protein_coding	nudix hydrolase 16 like 1 [Source:HGNC Symbol;Acc:HGNC:28154]	-
ENSG00000162910	33.3697	54.6073	36.1329	46.6492	46.1792	52.6787	MRPL55	1	228106679	228109312	-	1886	protein_coding	mitochondrial ribosomal protein L55 [Source:HGNC Symbol;Acc:HGNC:16686]	-
ENSG00000147669	27.5607	61.5597	44.8637	44.0779	43.3765	47.2823	POLR2K	8	100150623	100154003	+	1673	protein_coding	RNA polymerase II subunit K [Source:HGNC Symbol;Acc:HGNC:9198]	-
ENSG00000128965	34.0557	38.5962	36.667	61.6921	65.1317	32.4191	CHAC1	15	40952962	40956512	+	2051	protein_coding	ChaC glutathione specific gamma-glutamylcyclotransferase 1 [Source:HGNC Symbol;Acc:HGNC:28680]	-
ENSG00000115649	37.8978	55.3067	43.259	38.7303	47.5833	45.7393	CNPPD1	2	219171897	219178106	-	2719	protein_coding	cyclin Pas1/PHO80 domain containing 1 [Source:HGNC Symbol;Acc:HGNC:25220]	-
ENSG00000005448	30.2601	48.8979	34.6232	51.1688	47.3356	56.15	WDR54	2	74421678	74425755	+	2860	protein_coding	WD repeat domain 54 [Source:HGNC Symbol;Acc:HGNC:25770]	-
ENSG00000141101	41.2229	52.0352	48.1807	48.9399	36.6756	41.3186	NOB1	16	69741871	69754926	-	2101	protein_coding	NIN1 (RPN12) binding protein 1 homolog [Source:HGNC Symbol;Acc:HGNC:29540]	-
ENSG00000032444	29.3989	39.1476	34.4401	50.3142	56.9099	58.0488	PNPLA6	19	7534004	7561764	+	7172	protein_coding	patatin like phospholipase domain containing 6 [Source:HGNC Symbol;Acc:HGNC:16268]	-
ENSG00000119705	24.4164	68.1469	34.675	35.3799	49.8569	55.6845	SLIRP	14	77708071	77761104	+	2631	protein_coding	SRA stem-loop interacting RNA binding protein [Source:HGNC Symbol;Acc:HGNC:20495]	-
ENSG00000100227	39.2379	57.8263	44.7121	45.2828	36.445	44.5536	POLDIP3	22	42583721	42614962	-	3650	protein_coding	DNA polymerase delta interacting protein 3 [Source:HGNC Symbol;Acc:HGNC:23782]	-
ENSG00000161642	29.5419	30.7405	31.2182	55.0552	56.3633	64.7754	ZNF385A	12	54369133	54391298	-	3179	protein_coding	zinc finger protein 385A [Source:HGNC Symbol;Acc:HGNC:17521]	zf-C2H2
ENSG00000188612	52.2249	66.1345	57.155	39.5581	25.5447	26.5359	SUMO2	17	75165586	75182959	-	3348	protein_coding	small ubiquitin like modifier 2 [Source:HGNC Symbol;Acc:HGNC:11125]	-
ENSG00000183087	41.5919	59.0074	47.0289	37.9851	39.2428	42.039	GAS6	13	113820549	113864076	-	6015	protein_coding	growth arrest specific 6 [Source:HGNC Symbol;Acc:HGNC:4168]	-
ENSG00000049541	44.2159	74.7144	49.1418	38.2126	26.3284	33.2737	RFC2	7	74231499	74254458	-	2211	protein_coding	replication factor C subunit 2 [Source:HGNC Symbol;Acc:HGNC:9970]	-
ENSG00000237991	21.8568	64.884	35.9619	46.4678	46.0774	50.371	RPL35P1	1	236981339	236981708	+	370	processed_pseudogene	ribosomal protein L35 pseudogene 1 [Source:HGNC Symbol;Acc:HGNC:36695]	-
ENSG00000183696	41.3663	88.2908	51.5716	39.5778	26.9875	17.5468	UPP1	7	48088628	48108736	+	4580	protein_coding	uridine phosphorylase 1 [Source:HGNC Symbol;Acc:HGNC:12576]	-
ENSG00000069998	31.4198	48.257	38.2757	46.4382	45.1853	55.6148	HDHD5	22	17137511	17165287	-	4936	protein_coding	haloacid dehalogenase like hydrolase domain containing 5 [Source:HGNC Symbol;Acc:HGNC:1843]	-
ENSG00000237506	35.8281	97.3306	46.0204	41.0296	16.414	28.3189	RPSAP15	X	87703343	87704203	-	861	processed_pseudogene	ribosomal protein SA pseudogene 15 [Source:HGNC Symbol;Acc:HGNC:31464]	-
ENSG00000169972	35.3009	44.641	37.22	44.628	46.3199	56.4167	PUSL1	1	1308597	1311677	+	2459	protein_coding	pseudouridine synthase like 1 [Source:HGNC Symbol;Acc:HGNC:26914]	-
ENSG00000127564	35.5459	33.8035	38.2789	48.3653	50.8946	57.0352	PKMYT1	16	2968024	2980479	-	4974	protein_coding	protein kinase, membrane associated tyrosine/threonine 1 [Source:HGNC Symbol;Acc:HGNC:29650]	-
ENSG00000141295	25.9653	42.9117	34.9549	49.6034	55.5575	54.6455	SCRN2	17	47837692	47841289	-	2999	protein_coding	secernin 2 [Source:HGNC Symbol;Acc:HGNC:30381]	-
ENSG00000116786	33.587	39.8518	41.1667	47.5193	49.8544	51.4047	PLEKHM2	1	15684320	15734769	+	4134	protein_coding	pleckstrin homology and RUN domain containing M2 [Source:HGNC Symbol;Acc:HGNC:29131]	-
ENSG00000112655	35.4361	41.2705	44.4188	51.942	43.3918	46.3279	PTK7	6	43076307	43161719	+	8985	protein_coding	protein tyrosine kinase 7 (inactive) [Source:HGNC Symbol;Acc:HGNC:9618]	-
ENSG00000100632	42.8926	37.6868	42.3378	45.0151	46.709	47.8431	ERH	14	69380128	69398299	-	1113	protein_coding	ERH mRNA splicing and mitosis factor [Source:HGNC Symbol;Acc:HGNC:3447]	-
ENSG00000136938	51.7906	31.0212	47.1742	46.1145	39.1368	46.5351	ANP32B	9	97983341	98015943	+	1870	protein_coding	acidic nuclear phosphoprotein 32 family member B [Source:HGNC Symbol;Acc:HGNC:16677]	-
ENSG00000135046	33.7147	62.6703	59.811	42.2751	44.5702	18.6766	ANXA1	9	73151865	73170393	+	4453	protein_coding	annexin A1 [Source:HGNC Symbol;Acc:HGNC:533]	-
ENSG00000089351	28.2954	39.5162	37.6845	48.9858	56.5435	50.6916	GRAMD1A	19	34994784	35026471	+	5942	protein_coding	GRAM domain containing 1A [Source:HGNC Symbol;Acc:HGNC:29305]	-
ENSG00000169813	60.5866	54.952	49.7395	33.6112	28.9973	33.514	HNRNPF	10	43385617	43409166	-	3253	protein_coding	heterogeneous nuclear ribonucleoprotein F [Source:HGNC Symbol;Acc:HGNC:5039]	-
ENSG00000214389	34.9381	68.8694	43.9766	37.9491	29.042	46.4716	RPS3AP26	7	98385801	98386584	-	784	processed_pseudogene	ribosomal protein S3a pseudogene 26 [Source:HGNC Symbol;Acc:HGNC:36513]	-
ENSG00000185519	22.4091	29.4199	31.5423	53.6503	59.2112	64.973	FAM131C	1	16057769	16073651	-	1720	protein_coding	family with sequence similarity 131 member C [Source:HGNC Symbol;Acc:HGNC:26717]	-
ENSG00000003249	27.2932	29.0593	33.1584	52.4416	54.653	64.5077	DBNDD1	16	90004865	90020128	-	4791	protein_coding	dysbindin domain containing 1 [Source:HGNC Symbol;Acc:HGNC:28455]	-
ENSG00000149499	27.5483	36.8524	33.3287	53.9731	54.5386	54.8395	EML3	11	62602218	62612765	-	5490	protein_coding	EMAP like 3 [Source:HGNC Symbol;Acc:HGNC:26666]	-
ENSG00000133027	26.125	51.3681	38.8081	37.7973	54.353	52.3043	PEMT	17	17505563	17591708	-	1720	protein_coding	phosphatidylethanolamine N-methyltransferase [Source:HGNC Symbol;Acc:HGNC:8830]	-
ENSG00000153551	24.0626	28.2308	30.7753	54.9872	63.5806	58.8515	CMTM7	3	32391698	32483067	+	3724	protein_coding	CKLF like MARVEL transmembrane domain containing 7 [Source:HGNC Symbol;Acc:HGNC:19178]	-
ENSG00000142544	33.928	40.8867	35.4426	42.9625	52.4672	54.6085	CTU1	19	51097606	51108409	-	2126	protein_coding	cytosolic thiouridylase subunit 1 [Source:HGNC Symbol;Acc:HGNC:29590]	-
ENSG00000189077	29.7067	78.0007	35.0658	43.5872	40.0138	33.6312	TMEM120A	7	75986831	75994656	-	2000	protein_coding	transmembrane protein 120A [Source:HGNC Symbol;Acc:HGNC:21697]	-
ENSG00000104886	31.1728	55.9055	36.8277	39.9645	43.5758	52.2891	PLEKHJ1	19	2230084	2237704	-	4655	protein_coding	pleckstrin homology domain containing J1 [Source:HGNC Symbol;Acc:HGNC:18211]	-
ENSG00000167552	47.405	75.738	49.5717	29.079	29.7346	28.0436	TUBA1A	12	49184795	49189080	-	3178	protein_coding	tubulin alpha 1a [Source:HGNC Symbol;Acc:HGNC:20766]	-
ENSG00000106400	24.3282	42.1749	29.4023	45.4302	60.6007	57.5279	ZNHIT1	7	101218165	101224190	+	5013	protein_coding	zinc finger HIT-type containing 1 [Source:HGNC Symbol;Acc:HGNC:21688]	-
ENSG00000099785	27.282	48.8515	34.8325	43.521	50.969	53.7186	2025-03-02	19	8413270	8439017	+	2216	protein_coding	membrane associated ring-CH-type finger 2 [Source:HGNC Symbol;Acc:HGNC:28038]	-
ENSG00000163814	57.5716	40.3169	56.5243	43.0021	31.0652	30.3493	CDCP1	3	45082277	45146422	-	6508	protein_coding	CUB domain containing protein 1 [Source:HGNC Symbol;Acc:HGNC:24357]	-
ENSG00000162076	36.1184	63.4324	43.1299	47.0325	31.9385	36.97	FLYWCH2	16	2883213	2899382	+	1338	protein_coding	FLYWCH family member 2 [Source:HGNC Symbol;Acc:HGNC:25178]	-
ENSG00000065057	18.9212	45.137	26.138	49.4169	57.0504	61.761	NTHL1	16	2039815	2047866	-	2430	protein_coding	nth like DNA glycosylase 1 [Source:HGNC Symbol;Acc:HGNC:8028]	-
ENSG00000242485	34.5298	74.4412	39.5064	34.9759	29.0033	45.9334	MRPL20	1	1401909	1407293	-	2767	protein_coding	mitochondrial ribosomal protein L20 [Source:HGNC Symbol;Acc:HGNC:14478]	-
ENSG00000121680	25.8797	43.0413	33.6032	49.5195	57.2328	49.0617	PEX16	11	45909663	45918812	-	3019	protein_coding	peroxisomal biogenesis factor 16 [Source:HGNC Symbol;Acc:HGNC:8857]	-
ENSG00000130312	39.8037	70.666	45.477	46.6061	22.9181	32.4975	MRPL34	19	17292609	17306843	+	1686	protein_coding	mitochondrial ribosomal protein L34 [Source:HGNC Symbol;Acc:HGNC:14488]	-
ENSG00000104679	30.5755	58.1963	37.2877	47.3444	42.0715	42.4386	R3HCC1	8	23270120	23296279	+	2630	protein_coding	R3H domain and coiled-coil containing 1 [Source:HGNC Symbol;Acc:HGNC:27329]	-
ENSG00000131016	36.7226	24.5209	28.5675	41.85	75.9443	50.2711	AKAP12	6	151239967	151358559	+	8775	protein_coding	A-kinase anchoring protein 12 [Source:HGNC Symbol;Acc:HGNC:370]	-
ENSG00000182446	39.8006	49.6744	40.0778	38.4378	38.8276	51.0578	NPLOC4	17	81556887	81648465	-	9540	protein_coding	NPL4 homolog, ubiquitin recognition factor [Source:HGNC Symbol;Acc:HGNC:18261]	-
ENSG00000167986	37.5411	47.5465	36.5827	42.7902	40.8568	51.9636	DDB1	11	61299451	61342596	-	13950	protein_coding	damage specific DNA binding protein 1 [Source:HGNC Symbol;Acc:HGNC:2717]	-
ENSG00000178980	29.0671	62.4447	33.3247	45.0083	38.8336	48.2498	SELENOW	19	47778585	47784686	+	5248	protein_coding	selenoprotein W [Source:HGNC Symbol;Acc:HGNC:10752]	-
ENSG00000126088	29.6062	64.6804	37.7145	42.7234	36.9976	44.8492	UROD	1	45010950	45015575	+	4029	protein_coding	uroporphyrinogen decarboxylase [Source:HGNC Symbol;Acc:HGNC:12591]	-
ENSG00000163479	38.0527	69.5372	43.8888	39.1357	32.3334	33.54	SSR2	1	156009048	156020951	-	6643	protein_coding	signal sequence receptor subunit 2 [Source:HGNC Symbol;Acc:HGNC:11324]	-
ENSG00000262919	31.0339	71.6306	39.4087	34.2811	34.9796	44.997	CCNQ	X	153587925	153600045	-	1677	protein_coding	cyclin Q [Source:HGNC Symbol;Acc:HGNC:28434]	-
ENSG00000241494	20.697	45.2341	45.8199	43.087	44.4295	56.6278	AL355032.1	14	101677943	101678380	+	438	processed_pseudogene	ribosomal protein L26-like 1 (RPL26L1) pseudogene	-
ENSG00000113811	42.0612	99.4595	54.5487	25.5475	11.3109	22.7415	SELENOK	3	53884417	53891962	-	2132	protein_coding	selenoprotein K [Source:HGNC Symbol;Acc:HGNC:30394]	-
ENSG00000198911	41.9479	42.1779	39.0721	43.8641	41.1034	47.4301	SREBF2	22	41833079	41907307	+	7556	protein_coding	sterol regulatory element binding transcription factor 2 [Source:HGNC Symbol;Acc:HGNC:11290]	bHLH
ENSG00000055950	40.3573	60.0216	47.548	42.5557	26.6044	38.1994	MRPL43	10	100969458	100987515	-	3573	protein_coding	mitochondrial ribosomal protein L43 [Source:HGNC Symbol;Acc:HGNC:14517]	-
ENSG00000169217	33.7594	59.4891	41.4192	42.0545	35.6152	42.7032	CD2BP2	16	30350773	30355308	-	3713	protein_coding	CD2 cytoplasmic tail binding protein 2 [Source:HGNC Symbol;Acc:HGNC:1656]	-
ENSG00000104812	28.28	32.4912	31.1491	43.4382	50.8842	68.6772	GYS1	19	48968130	48993310	-	4241	protein_coding	glycogen synthase 1 [Source:HGNC Symbol;Acc:HGNC:4706]	-
ENSG00000173456	35.8546	46.7874	34.8679	42.1352	38.7308	56.4195	RNF26	11	119334527	119337309	+	2783	protein_coding	ring finger protein 26 [Source:HGNC Symbol;Acc:HGNC:14646]	-
ENSG00000130707	32.5873	63.1343	38.9245	49.6249	35.8079	34.4753	ASS1	9	130444961	130501274	+	3018	protein_coding	argininosuccinate synthase 1 [Source:HGNC Symbol;Acc:HGNC:758]	-
ENSG00000130829	21.5273	31.9402	25.0619	47.9753	66.7545	61.057	DUSP9	X	153642492	153651326	+	2769	protein_coding	dual specificity phosphatase 9 [Source:HGNC Symbol;Acc:HGNC:3076]	-
ENSG00000110108	42.6342	42.5138	40.317	42.7728	35.9528	49.9668	TMEM109	11	60914158	60923443	+	2137	protein_coding	transmembrane protein 109 [Source:HGNC Symbol;Acc:HGNC:28771]	-
ENSG00000117118	47.4961	72.7885	55.12	34.0713	16.9701	27.2633	SDHB	1	17018722	17054170	-	2462	protein_coding	succinate dehydrogenase complex iron sulfur subunit B [Source:HGNC Symbol;Acc:HGNC:10681]	-
ENSG00000173846	33.246	43.5364	40.4798	45.9445	47.5012	42.7929	PLK3	1	44800377	44805990	+	3327	protein_coding	polo like kinase 3 [Source:HGNC Symbol;Acc:HGNC:2154]	-
ENSG00000168056	27.143	35.8304	31.1809	51.3536	49.6601	57.94	LTBP3	11	65538805	65558930	-	10673	protein_coding	latent transforming growth factor beta binding protein 3 [Source:HGNC Symbol;Acc:HGNC:6716]	-
ENSG00000265354	50.0368	69.5216	57.8221	33.5238	16.9186	24.3755	TIMM23	10	45972489	46003742	+	1190	protein_coding	translocase of inner mitochondrial membrane 23 [Source:HGNC Symbol;Acc:HGNC:17312]	-
ENSG00000167657	35.0438	55.0713	44.6175	33.2113	36.6763	47.0851	DAPK3	19	3958453	3971123	-	3549	protein_coding	death associated protein kinase 3 [Source:HGNC Symbol;Acc:HGNC:2676]	-
ENSG00000149136	43.1938	36.9404	37.0176	46.6213	36.408	51.4237	SSRP1	11	57325986	57335892	-	6337	protein_coding	structure specific recognition protein 1 [Source:HGNC Symbol;Acc:HGNC:11327]	HMG
ENSG00000120509	35.7223	79.3152	46.6516	38.3775	17.1504	33.9511	PDZD11	X	70286595	70290514	-	1393	protein_coding	PDZ domain containing 11 [Source:HGNC Symbol;Acc:HGNC:28034]	-
ENSG00000178605	26.2939	41.6118	31.8706	48.7616	45.6747	56.7328	GTPBP6	X	304529	318819	-	2964	protein_coding	GTP binding protein 6 (putative) [Source:HGNC Symbol;Acc:HGNC:30189]	-
ENSG00000155368	33.4797	75.6222	39.8477	45.3447	22.352	34.1528	DBI	2	119366921	119372560	+	2509	protein_coding	diazepam binding inhibitor, acyl-CoA binding protein [Source:HGNC Symbol;Acc:HGNC:2690]	-
ENSG00000169957	35.6785	45.0184	39.658	48.6482	38.9656	42.7665	ZNF768	16	30524004	30526821	-	2369	protein_coding	zinc finger protein 768 [Source:HGNC Symbol;Acc:HGNC:26273]	zf-C2H2
ENSG00000102317	46.1125	77.774	55.3841	32.5026	13.4933	25.4672	RBM3	X	48574449	48581162	+	5827	protein_coding	RNA binding motif protein 3 [Source:HGNC Symbol;Acc:HGNC:9900]	-
ENSG00000140564	36.1923	34.2309	42.8464	50.5691	40.9112	45.7969	FURIN	15	90868588	90883458	+	4732	protein_coding	furin, paired basic amino acid cleaving enzyme [Source:HGNC Symbol;Acc:HGNC:8568]	-
ENSG00000177352	30.8792	59.9954	32.6315	44.2112	39.0156	43.6977	CCDC71	3	49162535	49166331	-	1791	protein_coding	coiled-coil domain containing 71 [Source:HGNC Symbol;Acc:HGNC:25760]	-
ENSG00000100280	29.1981	30.0495	32.3979	50.4229	50.4571	57.5656	AP1B1	22	29327680	29423179	-	6721	protein_coding	adaptor related protein complex 1 subunit beta 1 [Source:HGNC Symbol;Acc:HGNC:554]	-
ENSG00000125753	43.3556	54.8137	42.6992	42.9197	29.2928	36.9138	VASP	19	45506579	45526983	+	3538	protein_coding	vasodilator stimulated phosphoprotein [Source:HGNC Symbol;Acc:HGNC:12652]	-
ENSG00000129932	31.6116	38.7342	32.2756	40.9097	46.8948	58.5	DOHH	19	3490821	3500940	-	2387	protein_coding	deoxyhypusine hydroxylase [Source:HGNC Symbol;Acc:HGNC:28662]	-
ENSG00000088826	37.0807	59.6485	45.3406	41.8557	34.589	30.371	SMOX	20	4120980	4187747	+	2946	protein_coding	spermine oxidase [Source:HGNC Symbol;Acc:HGNC:15862]	-
ENSG00000011422	61.6913	63.415	70.7092	18.022	19.0376	15.8145	PLAUR	19	43646095	43670547	-	4457	protein_coding	plasminogen activator, urokinase receptor [Source:HGNC Symbol;Acc:HGNC:9053]	-
ENSG00000179526	31.0505	38.3856	36.4792	45.5138	46.6301	50.3521	SHARPIN	8	144098633	144108124	-	2783	protein_coding	SHANK associated RH domain interactor [Source:HGNC Symbol;Acc:HGNC:25321]	-
ENSG00000060491	37.0474	40.2194	39.8991	45.7783	34.1233	50.9319	OGFR	20	62804835	62814000	+	4702	protein_coding	opioid growth factor receptor [Source:HGNC Symbol;Acc:HGNC:15768]	-
ENSG00000108819	40.6504	34.7489	42.4186	53.1346	31.8305	45.1881	PPP1R9B	17	50133737	50150677	-	4343	protein_coding	protein phosphatase 1 regulatory subunit 9B [Source:HGNC Symbol;Acc:HGNC:9298]	-
ENSG00000143933	38.0727	56.1768	53.0837	29.4453	34.9383	35.8499	CALM2	2	47160083	47176921	-	7114	protein_coding	calmodulin 2 [Source:HGNC Symbol;Acc:HGNC:1445]	-
ENSG00000052344	32.9925	42.0579	43.9349	41.5831	43.9977	42.981	PRSS8	16	31131433	31135727	-	2975	protein_coding	serine protease 8 [Source:HGNC Symbol;Acc:HGNC:9491]	-
ENSG00000158864	32.7515	40.2313	34.9077	44.7982	43.9082	50.9302	NDUFS2	1	161197104	161214395	+	3658	protein_coding	NADH:ubiquinone oxidoreductase core subunit S2 [Source:HGNC Symbol;Acc:HGNC:7708]	-
ENSG00000129353	30.1066	32.1875	34.4704	46.261	48.9124	55.5483	SLC44A2	19	10602457	10644557	+	4952	protein_coding	solute carrier family 44 member 2 [Source:HGNC Symbol;Acc:HGNC:17292]	-
ENSG00000187193	35.0824	61.0818	51.4635	33.5608	36.5647	29.6975	MT1X	16	56682470	56684196	+	1727	protein_coding	metallothionein 1X [Source:HGNC Symbol;Acc:HGNC:7405]	-
ENSG00000161888	30.7367	52.1516	34.9311	42.0611	39.1125	47.656	SPC24	19	11131520	11155808	-	2839	protein_coding	SPC24 component of NDC80 kinetochore complex [Source:HGNC Symbol;Acc:HGNC:26913]	-
ENSG00000185359	32.5731	39.2441	35.0946	41.6551	42.0078	55.9751	HGS	17	81683326	81703138	+	8205	protein_coding	hepatocyte growth factor-regulated tyrosine kinase substrate [Source:HGNC Symbol;Acc:HGNC:4897]	-
ENSG00000234741	49.4588	88.8033	70.583	18.7667	9.13836	9.70954	GAS5	1	173858559	173868882	-	4842	lncRNA	growth arrest specific 5 [Source:HGNC Symbol;Acc:HGNC:16355]	-
ENSG00000139579	36.5054	75.8649	42.9189	35.5789	22.1165	33.4249	NABP2	12	56222015	56229854	+	2201	protein_coding	nucleic acid binding protein 2 [Source:HGNC Symbol;Acc:HGNC:28412]	-
ENSG00000184164	51.7954	76.6147	53.3736	23.3664	19.3162	21.8944	CRELD2	22	49918167	49927540	+	5165	protein_coding	cysteine rich with EGF like domains 2 [Source:HGNC Symbol;Acc:HGNC:28150]	-
ENSG00000102225	32.3942	45.5315	38.5407	43.5294	42.2304	44.0709	CDK16	X	47217860	47229997	+	6531	protein_coding	cyclin dependent kinase 16 [Source:HGNC Symbol;Acc:HGNC:8749]	-
ENSG00000137876	33.5437	63.2094	47.3559	52.6638	27.7284	21.7402	RSL24D1	15	55180806	55197049	-	2965	protein_coding	ribosomal L24 domain containing 1 [Source:HGNC Symbol;Acc:HGNC:18479]	-
ENSG00000116285	54.434	29.0865	44.1009	38.4578	51.8539	28.2674	ERRFI1	1	8004404	8026309	-	4179	protein_coding	ERBB receptor feedback inhibitor 1 [Source:HGNC Symbol;Acc:HGNC:18185]	-
ENSG00000137076	38.5192	31.7456	36.6003	45.2701	38.347	55.202	TLN1	9	35696948	35732195	-	9876	protein_coding	talin 1 [Source:HGNC Symbol;Acc:HGNC:11845]	-
ENSG00000143819	29.9825	46.1529	35.3203	47.7461	45.236	41.2344	EPHX1	1	225810092	225845563	+	2508	protein_coding	epoxide hydrolase 1 [Source:HGNC Symbol;Acc:HGNC:3401]	-
ENSG00000162729	29.7154	41.9372	40.3302	42.1308	47.0371	44.0068	IGSF8	1	160091340	160098943	-	2592	protein_coding	immunoglobulin superfamily member 8 [Source:HGNC Symbol;Acc:HGNC:17813]	-
ENSG00000100258	32.0876	34.3588	38.9032	47.4397	49.4575	42.7248	LMF2	22	50502949	50507702	-	3065	protein_coding	lipase maturation factor 2 [Source:HGNC Symbol;Acc:HGNC:25096]	-
ENSG00000111678	32.5006	47.6372	31.18	64.3715	28.0716	40.8906	C12orf57	12	6942978	6946003	+	1806	protein_coding	chromosome 12 open reading frame 57 [Source:HGNC Symbol;Acc:HGNC:29521]	-
ENSG00000114353	33.3355	42.363	35.4015	40.9221	43.2366	49.23	GNAI2	3	50226292	50259362	+	7405	protein_coding	G protein subunit alpha i2 [Source:HGNC Symbol;Acc:HGNC:4385]	-
ENSG00000165912	33.8517	45.708	34.9288	47.3659	41.6282	40.7419	PACSIN3	11	47177522	47186443	-	2755	protein_coding	protein kinase C and casein kinase substrate in neurons 3 [Source:HGNC Symbol;Acc:HGNC:8572]	-
ENSG00000169241	42.1407	70.2523	45.7101	32.1452	23.9663	29.583	SLC50A1	1	155135344	155138857	+	2340	protein_coding	solute carrier family 50 member 1 [Source:HGNC Symbol;Acc:HGNC:30657]	-
ENSG00000116478	41.9821	47.2331	41.3535	39.9305	35.0542	38.0358	HDAC1	1	32292083	32333635	+	3966	protein_coding	histone deacetylase 1 [Source:HGNC Symbol;Acc:HGNC:4852]	-
ENSG00000175390	30.7176	36.2433	33.627	51.4724	41.4528	50.0729	EIF3F	11	7970251	8001862	+	9431	protein_coding	eukaryotic translation initiation factor 3 subunit F [Source:HGNC Symbol;Acc:HGNC:3275]	-
ENSG00000231991	44.1179	43.7478	47.5674	35.358	39.0368	33.5213	ANXA2P2	9	33624274	33625293	+	1020	processed_pseudogene	annexin A2 pseudogene 2 [Source:HGNC Symbol;Acc:HGNC:539]	-
ENSG00000130733	31.5211	59.4734	37.1361	39.7949	41.337	34.0864	YIPF2	19	10922185	10928681	-	2518	protein_coding	Yip1 domain family member 2 [Source:HGNC Symbol;Acc:HGNC:28476]	-
ENSG00000254986	29.5177	31.5288	30.8508	45.7475	51.8084	53.7687	DPP3	11	66480013	66509657	+	3977	protein_coding	dipeptidyl peptidase 3 [Source:HGNC Symbol;Acc:HGNC:3008]	-
ENSG00000117984	31.6028	36.3475	33.5453	54.313	45.3712	41.9844	CTSD	11	1752755	1764573	-	3079	protein_coding	cathepsin D [Source:HGNC Symbol;Acc:HGNC:2529]	-
ENSG00000132481	27.4143	33.0024	34.7814	42.4104	45.5781	59.6833	TRIM47	17	75874164	75878581	-	3145	protein_coding	tripartite motif containing 47 [Source:HGNC Symbol;Acc:HGNC:19020]	-
ENSG00000099901	43.2809	57.7972	46.3992	37.6942	25.4793	32.1813	RANBP1	22	20115938	20127355	+	4620	protein_coding	RAN binding protein 1 [Source:HGNC Symbol;Acc:HGNC:9847]	-
ENSG00000007255	20.481	66.9581	27.0257	45.9974	49.8899	32.4416	TRAPPC6A	19	45162928	45178237	-	933	protein_coding	trafficking protein particle complex 6A [Source:HGNC Symbol;Acc:HGNC:23069]	-
ENSG00000173039	32.4596	34.6748	38.689	38.8766	44.6984	52.1348	RELA	11	65653597	65663090	-	5459	protein_coding	RELA proto-oncogene, NF-kB subunit [Source:HGNC Symbol;Acc:HGNC:9955]	RHD
ENSG00000161091	38.7978	45.8037	43.5104	36.4241	35.3661	41.5754	MFSD12	19	3538261	3574290	-	5290	protein_coding	major facilitator superfamily domain containing 12 [Source:HGNC Symbol;Acc:HGNC:28299]	-
ENSG00000161921	28.1139	31.8894	33.9271	45.2306	47.949	54.3361	CXCL16	17	4733533	4739928	-	2793	protein_coding	C-X-C motif chemokine ligand 16 [Source:HGNC Symbol;Acc:HGNC:16642]	-
ENSG00000167470	42.9171	34.828	41.2407	47.5596	32.7722	41.9423	MIDN	19	1248553	1259140	+	4492	protein_coding	midnolin [Source:HGNC Symbol;Acc:HGNC:16298]	-
ENSG00000162444	38.8886	64.9153	52.1927	35.606	21.99	27.6358	RBP7	1	9997206	10016021	+	862	protein_coding	retinol binding protein 7 [Source:HGNC Symbol;Acc:HGNC:30316]	-
ENSG00000173267	23.0636	45.3995	30.2428	62.5911	38.3339	41.3516	SNCG	10	86958599	86963258	+	1264	protein_coding	synuclein gamma [Source:HGNC Symbol;Acc:HGNC:11141]	-
ENSG00000184436	25.2127	52.481	29.0835	43.8795	40.8482	49.2572	THAP7	22	20999104	21002196	-	2879	protein_coding	THAP domain containing 7 [Source:HGNC Symbol;Acc:HGNC:23190]	THAP
ENSG00000120306	39.51	68.2919	43.3478	31.6815	24.5223	32.9762	CYSTM1	5	140175156	140282052	+	1857	protein_coding	cysteine rich transmembrane module containing 1 [Source:HGNC Symbol;Acc:HGNC:30239]	-
ENSG00000079999	38.3312	47.5077	37.8162	38.4016	33.4163	44.8274	KEAP1	19	10486125	10503558	-	3573	protein_coding	kelch like ECH associated protein 1 [Source:HGNC Symbol;Acc:HGNC:23177]	-
ENSG00000112335	47.0938	58.781	54.6925	33.7272	19.2357	26.6768	SNX3	6	108211222	108261246	-	1828	protein_coding	sorting nexin 3 [Source:HGNC Symbol;Acc:HGNC:11174]	-
ENSG00000132591	30.367	44.5033	36.1659	35.2593	43.2876	50.5781	ERAL1	17	28855010	28861061	+	2240	protein_coding	Era like 12S mitochondrial rRNA chaperone 1 [Source:HGNC Symbol;Acc:HGNC:3424]	-
ENSG00000259781	50.0743	60.9246	51.7779	42.5211	17.7966	16.9197	HMGB1P6	15	71164770	71165415	-	646	processed_pseudogene	high mobility group box 1 pseudogene 6 [Source:HGNC Symbol;Acc:HGNC:4998]	-
ENSG00000115884	36.914	40.6089	38.9846	42.3262	34.5055	46.6195	SDC1	2	20200797	20225433	-	3613	protein_coding	syndecan 1 [Source:HGNC Symbol;Acc:HGNC:10658]	-
ENSG00000216866	16.6183	58.6211	32.9685	39.7031	47.1259	44.6733	RPS2P55	X	40934982	40935864	-	883	processed_pseudogene	ribosomal protein S2 pseudogene 55 [Source:HGNC Symbol;Acc:HGNC:36140]	-
ENSG00000161999	23.8735	33.7558	27.6094	47.1248	47.7372	59.5339	JMJD8	16	681670	684528	-	2628	protein_coding	jumonji domain containing 8 [Source:HGNC Symbol;Acc:HGNC:14148]	-
ENSG00000183828	21.1379	46.1133	28.4307	35.8937	55.1152	52.9144	NUDT14	14	105172938	105181323	-	1916	protein_coding	nudix hydrolase 14 [Source:HGNC Symbol;Acc:HGNC:20141]	-
ENSG00000105520	23.7717	27.24	29.4682	45.2662	50.8208	62.5083	PLPPR2	19	11355386	11365698	+	3273	protein_coding	phospholipid phosphatase related 2 [Source:HGNC Symbol;Acc:HGNC:29566]	-
ENSG00000085662	30.8241	59.2284	39.3318	40.675	30.8492	38.0238	AKR1B1	7	134442356	134459284	-	3654	protein_coding	aldo-keto reductase family 1 member B [Source:HGNC Symbol;Acc:HGNC:381]	-
ENSG00000089154	34.7018	32.9451	35.2422	43.9394	36.7662	54.9858	GCN1	12	120127202	120194715	-	9660	protein_coding	GCN1 activator of EIF2AK4 [Source:HGNC Symbol;Acc:HGNC:4199]	-
ENSG00000148803	18.6923	50.9473	25.9322	44.3683	50.5613	47.7766	FUOM	10	133355158	133358025	-	1270	protein_coding	fucose mutarotase [Source:HGNC Symbol;Acc:HGNC:24733]	-
ENSG00000023330	40.684	41.9131	40.2061	37.897	34.6084	42.8512	ALAS1	3	52198086	52214327	+	2536	protein_coding	5'-aminolevulinate synthase 1 [Source:HGNC Symbol;Acc:HGNC:396]	-
ENSG00000112578	36.1274	51.2344	37.1551	37.1689	32.7743	43.0807	BYSL	6	41921499	41933046	+	1937	protein_coding	bystin like [Source:HGNC Symbol;Acc:HGNC:1157]	-
ENSG00000164087	37.0829	62.9115	38.0174	38.3943	30.2601	30.7805	POC1A	3	52075226	52154690	-	2274	protein_coding	POC1 centriolar protein A [Source:HGNC Symbol;Acc:HGNC:24488]	-
ENSG00000233328	28.5231	45.5722	43.0999	27.7851	43.8838	48.3663	PFN1P1	1	171670517	171670939	-	423	processed_pseudogene	profilin 1 pseudogene 1 [Source:HGNC Symbol;Acc:HGNC:42989]	-
ENSG00000104907	28.6927	38.7332	33.1509	42.6242	43.9113	49.9869	TRMT1	19	13104902	13117567	-	3364	protein_coding	tRNA methyltransferase 1 [Source:HGNC Symbol;Acc:HGNC:25980]	-
ENSG00000214160	24.2939	29.6022	31.4479	42.94	53.7599	54.9569	ALG3	3	184242301	184249548	-	3455	protein_coding	ALG3 alpha-1,3- mannosyltransferase [Source:HGNC Symbol;Acc:HGNC:23056]	-
ENSG00000101084	37.162	66.1035	37.5875	33.9375	23.6406	38.4332	RAB5IF	20	36605779	36612557	+	1504	protein_coding	RAB5 interacting factor [Source:HGNC Symbol;Acc:HGNC:15870]	-
ENSG00000167693	26.9554	29.4303	29.0358	47.8073	48.396	55.1454	NXN	17	799310	979776	-	5889	protein_coding	nucleoredoxin [Source:HGNC Symbol;Acc:HGNC:18008]	-
ENSG00000128591	33.6841	33.5729	39.6876	43.0392	37.9393	48.6982	FLNC	7	128830377	128859274	+	9280	protein_coding	filamin C [Source:HGNC Symbol;Acc:HGNC:3756]	-
ENSG00000213563	24.9049	36.6082	33.1679	47.4219	43.9716	50.1965	C8orf82	8	144525733	144529132	-	3001	protein_coding	chromosome 8 open reading frame 82 [Source:HGNC Symbol;Acc:HGNC:33826]	-
ENSG00000185504	22.1251	27.6423	25.4474	46.6598	52.4038	61.9629	FAAP100	17	81539885	81553961	-	5353	protein_coding	FA core complex associated protein 100 [Source:HGNC Symbol;Acc:HGNC:26171]	-
ENSG00000078369	46.7918	37.8428	45.5033	36.9765	34.4422	34.623	GNB1	1	1785285	1891117	-	6417	protein_coding	G protein subunit beta 1 [Source:HGNC Symbol;Acc:HGNC:4396]	-
ENSG00000235552	55.3454	53.2199	45.187	40.435	18.2006	23.0604	RPL6P27	18	6462144	6463015	-	872	transcribed_processed_pseudogene	ribosomal protein L6 pseudogene 27 [Source:HGNC Symbol;Acc:HGNC:36133]	-
ENSG00000130821	32.0564	29.6908	33.0719	41.1071	42.3924	57.1179	SLC6A8	X	153687926	153696588	+	5666	protein_coding	solute carrier family 6 member 8 [Source:HGNC Symbol;Acc:HGNC:11055]	-
ENSG00000170860	22.6777	57.8675	34.2507	41.448	33.475	45.4932	LSM3	3	14178817	14201122	+	3359	protein_coding	LSM3 homolog, U6 small nuclear RNA and mRNA degradation associated [Source:HGNC Symbol;Acc:HGNC:17874]	-
ENSG00000073536	21.9299	42.6586	27.0018	44.234	52.7828	46.1341	NLE1	17	35128730	35142304	-	5475	protein_coding	notchless homolog 1 [Source:HGNC Symbol;Acc:HGNC:19889]	-
ENSG00000166986	46.4264	51.9245	48.681	36.2464	25.2716	26.1497	MARS	12	57475445	57517569	+	7028	protein_coding	methionyl-tRNA synthetase [Source:HGNC Symbol;Acc:HGNC:6898]	-
ENSG00000140553	29.3993	41.4091	31.825	42.8151	42.3562	46.7224	UNC45A	15	90930180	90954093	+	7498	protein_coding	unc-45 myosin chaperone A [Source:HGNC Symbol;Acc:HGNC:30594]	-
ENSG00000162236	37.1022	71.4518	43.5151	32.5239	23.2325	26.6973	STX5	11	62806860	62832051	-	2257	protein_coding	syntaxin 5 [Source:HGNC Symbol;Acc:HGNC:11440]	-
ENSG00000160256	30.4194	48.1926	30.1929	56.3669	25.2365	44.0909	FAM207A	21	44940012	44976989	+	1400	protein_coding	family with sequence similarity 207 member A [Source:HGNC Symbol;Acc:HGNC:15811]	-
ENSG00000103502	27.8419	40.061	36.1079	42.3136	42.0935	46.0333	CDIPT	16	29858357	29863414	-	3003	protein_coding	CDP-diacylglycerol--inositol 3-phosphatidyltransferase [Source:HGNC Symbol;Acc:HGNC:1769]	-
ENSG00000123992	25.6453	49.5517	31.0571	40.0872	41.3086	46.3758	DNPEP	2	219373527	219400022	-	4753	protein_coding	aspartyl aminopeptidase [Source:HGNC Symbol;Acc:HGNC:2981]	-
ENSG00000108826	35.3083	68.6186	43.0125	37.6055	19.2384	29.882	MRPL27	17	50367857	50373207	-	3020	protein_coding	mitochondrial ribosomal protein L27 [Source:HGNC Symbol;Acc:HGNC:14483]	-
ENSG00000181061	26.9826	58.1828	38.7535	43.5842	22.2985	43.754	HIGD1A	3	42784298	42804531	-	1675	protein_coding	HIG1 hypoxia inducible domain family member 1A [Source:HGNC Symbol;Acc:HGNC:29527]	-
ENSG00000182512	39.1361	55.2366	41.2819	40.1895	23.0383	34.6217	GLRX5	14	95533503	95544724	+	2388	protein_coding	glutaredoxin 5 [Source:HGNC Symbol;Acc:HGNC:20134]	-
ENSG00000105258	23.288	47.3308	28.513	43.5923	44.638	45.724	POLR2I	19	36113709	36115213	-	1137	protein_coding	RNA polymerase II subunit I [Source:HGNC Symbol;Acc:HGNC:9196]	-
ENSG00000105063	32.4213	30.7483	33.3291	44.3365	39.5012	52.6707	PPP6R1	19	55229779	55259017	-	6606	protein_coding	protein phosphatase 6 regulatory subunit 1 [Source:HGNC Symbol;Acc:HGNC:29195]	-
novel.399	32.7974	38.4324	23.0171	95.3059	20.2605	23.1525	-	CHR_HG2513_PATCH	8759417	8804417	-	1038	-	- && - && -	-
ENSG00000141682	48.5851	85.8515	62.3958	14.9947	13.0479	7.36701	PMAIP1	18	59899948	59904306	+	2235	protein_coding	phorbol-12-myristate-13-acetate-induced protein 1 [Source:HGNC Symbol;Acc:HGNC:9108]	-
ENSG00000184076	28.6289	42.0141	35.0601	48.3556	37.1573	40.6736	UQCR10	22	29767369	29770413	+	975	protein_coding	ubiquinol-cytochrome c reductase, complex III subunit X [Source:HGNC Symbol;Acc:HGNC:30863]	-
ENSG00000226084	26.3221	59.8187	38.0149	42.9585	31.1225	33.4544	AC113935.1	1	77129114	77129668	+	555	processed_pseudogene	ribosomal protein L17 (RPL17) pseudogene	-
ENSG00000115484	54.4005	37.4032	52.9371	32.6478	26.5975	27.7043	CCT4	2	61868085	61888671	-	2701	protein_coding	chaperonin containing TCP1 subunit 4 [Source:HGNC Symbol;Acc:HGNC:1617]	-
ENSG00000102854	36.4645	36.9673	42.3241	41.4433	37.9652	36.4944	MSLN	16	760734	768865	+	2588	protein_coding	mesothelin [Source:HGNC Symbol;Acc:HGNC:7371]	-
ENSG00000236801	27.9308	68.3463	39.5482	37.9726	24.6094	32.8152	RPL24P8	9	70217195	70217668	+	474	processed_pseudogene	ribosomal protein L24 pseudogene 8 [Source:HGNC Symbol;Acc:HGNC:36409]	-
ENSG00000127445	23.9608	47.6888	28.9549	45.7632	39.3304	45.0593	PIN1	19	9835257	9849682	+	4570	protein_coding	peptidylprolyl cis/trans isomerase, NIMA-interacting 1 [Source:HGNC Symbol;Acc:HGNC:8988]	-
ENSG00000160888	41.1344	47.8257	43.7402	35.5543	29.8528	32.6317	IER2	19	13150411	13154911	+	3079	protein_coding	immediate early response 2 [Source:HGNC Symbol;Acc:HGNC:28871]	-
ENSG00000197530	22.8526	37.0236	27.5035	38.372	51.9423	52.9943	MIB2	1	1615415	1630610	+	8767	protein_coding	mindbomb E3 ubiquitin protein ligase 2 [Source:HGNC Symbol;Acc:HGNC:30577]	-
ENSG00000125166	32.548	34.4515	32.1216	37.2597	37.512	56.5787	GOT2	16	58707131	58734342	-	3751	protein_coding	glutamic-oxaloacetic transaminase 2 [Source:HGNC Symbol;Acc:HGNC:4433]	-
ENSG00000164924	46.0648	27.315	38.8829	31.1747	50.6479	36.2402	YWHAZ	8	100916523	100953388	-	8557	protein_coding	tyrosine 3-monooxygenase/tryptophan 5-monooxygenase activation protein zeta [Source:HGNC Symbol;Acc:HGNC:12855]	-
ENSG00000006118	30.0032	30.3418	35.3159	47.6248	42.0743	44.953	TMEM132A	11	60924463	60937159	+	7271	protein_coding	transmembrane protein 132A [Source:HGNC Symbol;Acc:HGNC:31092]	-
ENSG00000103653	27.5285	31.2457	29.6948	44.8227	43.7236	53.1696	CSK	15	74782057	74803198	+	4570	protein_coding	C-terminal Src kinase [Source:HGNC Symbol;Acc:HGNC:2444]	-
ENSG00000090006	32.2389	35.663	35.3422	45.972	38.5056	41.9888	LTBP4	19	40592883	40629818	+	8108	protein_coding	latent transforming growth factor beta binding protein 4 [Source:HGNC Symbol;Acc:HGNC:6717]	-
ENSG00000094914	27.2764	35.5699	30.3104	41.4159	45.8662	49.2693	AAAS	12	53307456	53324864	-	4727	protein_coding	aladin WD repeat nucleoporin [Source:HGNC Symbol;Acc:HGNC:13666]	-
ENSG00000105518	25.8272	47.4013	28.0595	41.2749	39.0402	47.9897	TMEM205	19	11342776	11346518	-	1606	protein_coding	transmembrane protein 205 [Source:HGNC Symbol;Acc:HGNC:29631]	-
ENSG00000116586	32.4275	62.1864	38.9548	37.2232	26.6756	31.2807	LAMTOR2	1	156054752	156058510	+	1438	protein_coding	late endosomal/lysosomal adaptor, MAPK and MTOR activator 2 [Source:HGNC Symbol;Acc:HGNC:29796]	-
ENSG00000205352	31.3387	40.3881	34.3877	42.8077	36.0635	43.4432	PRR13	12	53441678	53446645	+	2824	protein_coding	proline rich 13 [Source:HGNC Symbol;Acc:HGNC:24528]	-
novel.781	36.6758	65.5682	41.2157	33.3138	20.792	30.7825	-	CHR_HSCHR6_MHC_QBL_CTG1	31393543	31405759	+	1764	-	- && Q29983.1 RecName: Full=MHC class I polypeptide-related sequence A; Short=MIC-A; Flags: Precursor && -	-
ENSG00000197157	35.2936	43.3844	35.2492	33.601	36.3757	44.4198	SND1	7	127652194	128092609	+	6486	protein_coding	staphylococcal nuclease and tudor domain containing 1 [Source:HGNC Symbol;Acc:HGNC:30646]	-
ENSG00000146540	23.847	42.1493	27.8138	43.5779	44.5732	46.098	C7orf50	7	996986	1138260	-	4961	protein_coding	chromosome 7 open reading frame 50 [Source:HGNC Symbol;Acc:HGNC:22421]	-
ENSG00000111775	40.9133	59.4526	28.2194	51.0099	21.1089	26.5818	COX6A1	12	120438090	120440737	+	1339	protein_coding	cytochrome c oxidase subunit 6A1 [Source:HGNC Symbol;Acc:HGNC:2277]	-
ENSG00000108179	37.2603	41.5321	40.9263	29.7709	29.3528	48.2139	PPIF	10	79347469	79355334	+	2671	protein_coding	peptidylprolyl isomerase F [Source:HGNC Symbol;Acc:HGNC:9259]	-
ENSG00000168374	55.8938	46.6003	54.0796	22.9303	20.3145	27.108	ARF4	3	57571363	57598220	-	2595	protein_coding	ADP ribosylation factor 4 [Source:HGNC Symbol;Acc:HGNC:655]	-
ENSG00000114779	21.416	28.9674	25.3494	41.7708	56.3117	52.6872	ABHD14B	3	51968510	51983409	-	3161	protein_coding	abhydrolase domain containing 14B [Source:HGNC Symbol;Acc:HGNC:28235]	-
novel.731	29.5755	49.8115	36.9703	35.7278	29.5078	44.809	-	CHR_HSCHR6_MHC_COX_CTG1	30536950	30537370	-	344	-	- && P36915.2 RecName: Full=Guanine nucleotide-binding protein-like 1; AltName: Full=GTP-binding protein HSR1 && PF01926:50S ribosome-binding GTPase	-
ENSG00000177885	46.7007	52.5709	45.9691	28.9377	21.4169	30.516	GRB2	17	75318076	75405709	-	4716	protein_coding	growth factor receptor bound protein 2 [Source:HGNC Symbol;Acc:HGNC:4566]	-
ENSG00000253368	38.3925	41.218	40.1555	45.5769	29.7833	30.7309	TRNP1	1	26993692	27000886	+	1979	protein_coding	TMF1 regulated nuclear protein 1 [Source:HGNC Symbol;Acc:HGNC:34348]	-
ENSG00000100241	26.1782	29.0058	32.5801	42.455	46.9676	48.3754	SBF1	22	50445000	50475035	-	9452	protein_coding	SET binding factor 1 [Source:HGNC Symbol;Acc:HGNC:10542]	-
ENSG00000232388	25.2437	68.6005	37.8278	31.5006	26.4061	35.7344	SMIM26	20	18567347	18569563	+	1098	protein_coding	small integral membrane protein 26 [Source:HGNC Symbol;Acc:HGNC:43430]	-
ENSG00000130560	35.4836	59.427	37.375	37.5575	24.4364	31.0011	UBAC1	9	135932969	135961373	-	2972	protein_coding	UBA domain containing 1 [Source:HGNC Symbol;Acc:HGNC:30221]	-
ENSG00000241553	25.9931	45.3154	33.5781	39.7975	37.5687	42.5866	ARPC4	3	9792495	9807726	+	3608	protein_coding	actin related protein 2/3 complex subunit 4 [Source:HGNC Symbol;Acc:HGNC:707]	-
ENSG00000104687	43.8889	33.9193	37.5525	42.8284	29.9089	36.5692	GSR	8	30678066	30727846	-	3602	protein_coding	glutathione-disulfide reductase [Source:HGNC Symbol;Acc:HGNC:4623]	-
ENSG00000143612	40.4497	56.7896	39.7852	32.876	24.7219	29.6005	C1orf43	1	154206696	154220637	-	2670	protein_coding	chromosome 1 open reading frame 43 [Source:HGNC Symbol;Acc:HGNC:29876]	-
ENSG00000155463	26.5627	31.4284	28.5848	42.6136	43.6629	51.139	OXA1L	14	22766522	22773042	+	4498	protein_coding	OXA1L mitochondrial inner membrane protein [Source:HGNC Symbol;Acc:HGNC:8526]	-
ENSG00000134057	45.2745	38.6988	39.0076	27.4384	36.3271	37.0627	CCNB1	5	69167135	69178245	+	2433	protein_coding	cyclin B1 [Source:HGNC Symbol;Acc:HGNC:1579]	-
ENSG00000104960	28.8022	35.8809	28.7296	44.248	41.1155	44.9511	PTOV1	19	49850735	49860744	+	5962	protein_coding	PTOV1 extended AT-hook containing adaptor protein [Source:HGNC Symbol;Acc:HGNC:9632]	-
ENSG00000147155	32.4245	58.2519	39.9167	35.4796	24.0438	33.5662	EBP	X	48521799	48528716	+	1768	protein_coding	EBP cholestenol delta-isomerase [Source:HGNC Symbol;Acc:HGNC:3133]	-
ENSG00000115756	35.5943	50.9403	39.4498	35.9116	29.5736	31.8028	HPCAL1	2	10302889	10427617	+	6237	protein_coding	hippocalcin like 1 [Source:HGNC Symbol;Acc:HGNC:5145]	-
ENSG00000158856	25.1656	32.7613	27.9393	42.2512	46.6653	48.4173	DMTN	8	22048995	22082527	+	4473	protein_coding	dematin actin binding protein [Source:HGNC Symbol;Acc:HGNC:3382]	-
ENSG00000068079	33.3196	63.9149	51.1202	32.6442	21.7446	20.2418	IFI35	17	43006725	43014456	+	1973	protein_coding	interferon induced protein 35 [Source:HGNC Symbol;Acc:HGNC:5399]	-
ENSG00000105197	24.7015	49.4995	27.7412	36.5872	40.2439	44.1998	TIMM50	19	39480412	39493785	+	7192	protein_coding	translocase of inner mitochondrial membrane 50 [Source:HGNC Symbol;Acc:HGNC:23656]	-
ENSG00000183386	25.8398	31.7971	28.3928	40.8862	52.0513	43.9829	FHL3	1	37996770	38005606	-	2004	protein_coding	four and a half LIM domains 3 [Source:HGNC Symbol;Acc:HGNC:3704]	-
ENSG00000060656	22.2338	24.8023	24.1267	48.8678	50.5837	52.124	PTPRU	1	29236516	29326813	+	6682	protein_coding	protein tyrosine phosphatase receptor type U [Source:HGNC Symbol;Acc:HGNC:9683]	-
ENSG00000253683	34.6469	44.6228	30.2476	59.4651	18.1095	35.3974	AC027309.2	5	172656522	172656713	-	192	processed_pseudogene	coiled-coil domain containing 72 (CCDC72) pseudogene	-
ENSG00000100412	32.2304	40.7325	33.2434	39.7921	36.7872	39.5402	ACO2	22	41469117	41528989	+	4049	protein_coding	aconitase 2 [Source:HGNC Symbol;Acc:HGNC:118]	-
ENSG00000237190	43.898	71.7207	42.8062	27.8247	15.182	20.8366	CDKN2AIPNL	5	134402065	134411881	-	1762	protein_coding	CDKN2A interacting protein N-terminal like [Source:HGNC Symbol;Acc:HGNC:30545]	-
ENSG00000125648	29.7428	33.5517	31.9596	39.5726	39.444	47.2842	SLC25A23	19	6436079	6465203	-	4881	protein_coding	solute carrier family 25 member 23 [Source:HGNC Symbol;Acc:HGNC:19375]	-
ENSG00000013588	38.7829	32.7269	39.9532	40.8852	36.6919	32.3179	GPRC5A	12	12890782	12917937	+	8440	protein_coding	G protein-coupled receptor class C group 5 member A [Source:HGNC Symbol;Acc:HGNC:9836]	-
ENSG00000167978	27.8693	17.6234	23.4728	47.0315	41.0846	63.7873	SRRM2	16	2752626	2772538	+	12969	protein_coding	serine/arginine repetitive matrix 2 [Source:HGNC Symbol;Acc:HGNC:16639]	-
ENSG00000181924	34.8896	55.9697	37.012	35.4623	21.5597	35.6653	COA4	11	73872667	73876901	-	2159	protein_coding	cytochrome c oxidase assembly factor 4 homolog [Source:HGNC Symbol;Acc:HGNC:24604]	-
novel.772	33.7806	140.556	17.7179	8.94689	4.12867	14.9832	-	CHR_HSCHR6_MHC_MCF_CTG1	31348415	31433248	-	1141	-	- && P30464.2 RecName: Full=HLA class I histocompatibility antigen, B-15 alpha chain; AltName: Full=MHC class I antigen B*15; Flags: Precursor && PF06623:MHC_I C-terminus	-
ENSG00000112977	46.3762	41.3966	44.3791	30.0534	25.9631	31.8951	DAP	5	10679230	10761272	-	3361	protein_coding	death associated protein [Source:HGNC Symbol;Acc:HGNC:2672]	-
ENSG00000136522	22.7426	56.228	36.9451	40.2471	26.8285	37.0087	MRPL47	3	179588285	179604649	-	1365	protein_coding	mitochondrial ribosomal protein L47 [Source:HGNC Symbol;Acc:HGNC:16652]	-
ENSG00000101608	41.6027	53.3824	55.4577	29.8652	20.8425	18.8063	MYL12A	18	3247481	3256236	+	3245	protein_coding	myosin light chain 12A [Source:HGNC Symbol;Acc:HGNC:16701]	-
ENSG00000025708	30.9422	42.1933	43.2911	32.6848	34.225	36.5895	TYMP	22	50525752	50530032	-	3600	protein_coding	thymidine phosphorylase [Source:HGNC Symbol;Acc:HGNC:3148]	-
ENSG00000136295	27.4184	26.6243	31.7624	43.2675	43.7495	47.0702	TTYH3	7	2631986	2664802	+	6094	protein_coding	tweety family member 3 [Source:HGNC Symbol;Acc:HGNC:22222]	-
ENSG00000224126	33.9867	43.8147	34.7598	37.8369	31.0308	37.7815	UBE2SP2	17	18677261	18677757	+	497	processed_pseudogene	ubiquitin conjugating enzyme E2 S pseudogene 2 [Source:HGNC Symbol;Acc:HGNC:32196]	-
ENSG00000077463	27.5201	46.1649	33.1866	37.477	39.0058	35.6569	SIRT6	19	4174109	4182566	-	2749	protein_coding	sirtuin 6 [Source:HGNC Symbol;Acc:HGNC:14934]	-
ENSG00000165171	18.9806	38.0371	25.1466	45.8544	52.2521	38.7048	METTL27	7	73834590	73842516	-	1450	protein_coding	methyltransferase like 27 [Source:HGNC Symbol;Acc:HGNC:19068]	-
ENSG00000071462	33.8157	57.2053	36.9324	34.9752	23.8966	32.1307	BUD23	7	73683025	73705161	+	7944	protein_coding	BUD23 rRNA methyltransferase and ribosome maturation factor [Source:HGNC Symbol;Acc:HGNC:16405]	-
ENSG00000149547	34.5424	53.0463	36.009	34.9943	22.924	37.3506	EI24	11	125569280	125584684	+	3491	protein_coding	EI24 autophagy associated transmembrane protein [Source:HGNC Symbol;Acc:HGNC:13276]	-
ENSG00000171443	28.7393	38.1508	33.4151	39.8955	44.5613	34.0357	ZNF524	19	55600022	55603138	+	1441	protein_coding	zinc finger protein 524 [Source:HGNC Symbol;Acc:HGNC:28322]	zf-C2H2
ENSG00000142208	26.3454	38.0665	30.4669	40.0905	39.8928	43.6886	AKT1	14	104769349	104795751	-	11162	protein_coding	AKT serine/threonine kinase 1 [Source:HGNC Symbol;Acc:HGNC:391]	-
ENSG00000130313	24.8011	41.9517	30.8031	45.7827	38.8223	36.34	PGLS	19	17511636	17521288	+	2840	protein_coding	6-phosphogluconolactonase [Source:HGNC Symbol;Acc:HGNC:8903]	-
ENSG00000170619	25.1302	58.0081	31.0988	31.4275	32.3375	40.4008	COMMD5	8	144841042	144853736	-	2917	protein_coding	COMM domain containing 5 [Source:HGNC Symbol;Acc:HGNC:17902]	-
ENSG00000148908	39.3662	45.6035	43.9694	36.8487	25.6635	26.8381	RGS10	10	119499817	119542719	-	1274	protein_coding	regulator of G protein signaling 10 [Source:HGNC Symbol;Acc:HGNC:9992]	-
ENSG00000134684	42.8061	46.3942	43.0587	35.7966	25.2269	24.8282	YARS	1	32775237	32818153	-	8212	protein_coding	tyrosyl-tRNA synthetase [Source:HGNC Symbol;Acc:HGNC:12840]	-
ENSG00000185386	20.6232	39.9746	28.2512	37.5529	49.4882	41.9921	MAPK11	22	50263713	50270767	-	2688	protein_coding	mitogen-activated protein kinase 11 [Source:HGNC Symbol;Acc:HGNC:6873]	-
ENSG00000090372	29.8634	35.1864	33.0265	41.9742	36.8562	40.6151	STRN4	19	46719511	46746994	-	7637	protein_coding	striatin 4 [Source:HGNC Symbol;Acc:HGNC:15721]	-
ENSG00000122490	25.6597	34.6857	30.6	35.8069	43.1302	47.265	SLC66A2	18	79902420	79951657	-	5218	protein_coding	solute carrier family 66 member 2 [Source:HGNC Symbol;Acc:HGNC:26188]	-
ENSG00000235363	18.261	58.7038	25.8113	20.5959	51.0961	42.6618	SNRPGP10	1	205351247	205351471	+	225	processed_pseudogene	small nuclear ribonucleoprotein polypeptide G pseudogene 10 [Source:HGNC Symbol;Acc:HGNC:39329]	-
ENSG00000141349	22.9	32.3763	24.7952	40.6416	47.911	48.1725	G6PC3	17	44070735	44076344	+	4551	protein_coding	glucose-6-phosphatase catalytic subunit 3 [Source:HGNC Symbol;Acc:HGNC:24861]	-
ENSG00000141934	29.1971	35.8752	33.83	38.5898	39.9128	39.1308	PLPP2	19	281040	291403	-	6958	protein_coding	phospholipid phosphatase 2 [Source:HGNC Symbol;Acc:HGNC:9230]	-
ENSG00000134248	32.7728	63.6081	41.4358	30.5991	18.8346	28.871	LAMTOR5	1	110401249	110407942	-	2388	protein_coding	late endosomal/lysosomal adaptor, MAPK and MTOR activator 5 [Source:HGNC Symbol;Acc:HGNC:17955]	-
ENSG00000126456	23.7906	43.1644	31.1569	39.5104	40.5605	37.8395	IRF3	19	49659569	49665875	-	3794	protein_coding	interferon regulatory factor 3 [Source:HGNC Symbol;Acc:HGNC:6118]	IRF
ENSG00000132661	38.2586	51.3456	39.8023	34.2759	24.0272	28.2371	NXT1	20	23350791	23354771	+	1062	protein_coding	nuclear transport factor 2 like export factor 1 [Source:HGNC Symbol;Acc:HGNC:15913]	-
ENSG00000129250	29.735	26.6967	31.1518	44.2439	38.1087	45.8632	KIF1C	17	4997950	5028401	+	8578	protein_coding	kinesin family member 1C [Source:HGNC Symbol;Acc:HGNC:6317]	-
ENSG00000102871	24.5805	44.0684	32.3079	31.0614	40.3123	43.3029	TRADD	16	67154185	67159909	-	2173	protein_coding	TNFRSF1A associated via death domain [Source:HGNC Symbol;Acc:HGNC:12030]	-
ENSG00000134419	24.2357	58.0718	33.0639	34.8724	27.2806	37.9331	RPS15A	16	18781295	18790383	-	6679	protein_coding	ribosomal protein S15a [Source:HGNC Symbol;Acc:HGNC:10389]	-
ENSG00000184986	22.033	40.5409	28.0451	34.2435	45.5003	44.9377	TMEM121	14	105526583	105530202	+	1924	protein_coding	transmembrane protein 121 [Source:HGNC Symbol;Acc:HGNC:20511]	-
ENSG00000180198	39.5198	49.8104	35.3952	31.9911	24.6076	33.9512	RCC1	1	28505943	28539300	+	3888	protein_coding	regulator of chromosome condensation 1 [Source:HGNC Symbol;Acc:HGNC:1913]	-
ENSG00000082641	46.9262	44.4939	41.0739	34.0198	22.7928	25.8798	NFE2L1	17	48048329	48061545	+	5883	protein_coding	nuclear factor, erythroid 2 like 1 [Source:HGNC Symbol;Acc:HGNC:7781]	TF_bZIP
ENSG00000174021	36.1936	29.7485	38.9724	39.5938	33.3603	36.8338	GNG5	1	84498325	84506581	-	1128	protein_coding	G protein subunit gamma 5 [Source:HGNC Symbol;Acc:HGNC:4408]	-
ENSG00000266472	33.3441	56.0708	36.8686	37.4888	21.5644	29.119	MRPS21	1	150293720	150308979	+	1641	protein_coding	mitochondrial ribosomal protein S21 [Source:HGNC Symbol;Acc:HGNC:14046]	-
ENSG00000090097	26.1883	35.407	29.657	42.995	38.7376	41.2367	PCBP4	3	51957454	51974016	-	3738	protein_coding	poly(rC) binding protein 4 [Source:HGNC Symbol;Acc:HGNC:8652]	-
ENSG00000197894	37.8628	68.0622	49.4318	29.0394	11.0641	18.6034	ADH5	4	99070978	99088801	-	4866	protein_coding	alcohol dehydrogenase 5 (class III), chi polypeptide [Source:HGNC Symbol;Acc:HGNC:253]	-
ENSG00000115944	30.1596	66.2217	38.0091	24.1802	22.7126	32.6386	COX7A2L	2	42333546	42425088	-	5605	protein_coding	cytochrome c oxidase subunit 7A2 like [Source:HGNC Symbol;Acc:HGNC:2289]	-
ENSG00000119411	34.965	51.4336	36.9609	31.6995	25.6069	32.711	BSPRY	9	113349541	113371233	+	2339	protein_coding	B-box and SPRY domain containing [Source:HGNC Symbol;Acc:HGNC:18232]	-
ENSG00000174276	21.9401	33.6646	23.9951	38.4661	48.4395	46.6021	ZNHIT2	11	65116403	65117701	-	1299	protein_coding	zinc finger HIT-type containing 2 [Source:HGNC Symbol;Acc:HGNC:1177]	-
ENSG00000114650	24.8508	29.0105	31.8697	38.0448	42.9438	46.2308	SCAP	3	47413681	47477126	-	6288	protein_coding	SREBF chaperone [Source:HGNC Symbol;Acc:HGNC:30634]	-
ENSG00000141543	36.3663	33.5057	35.472	33.7081	31.9701	41.9177	EIF4A3	17	80134369	80147151	-	5780	protein_coding	eukaryotic translation initiation factor 4A3 [Source:HGNC Symbol;Acc:HGNC:18683]	-
ENSG00000102977	22.6026	32.2868	27.7813	38.8627	45.5191	45.3911	ACD	16	67657512	67660815	-	3223	protein_coding	ACD shelterin complex subunit and telomerase recruitment factor [Source:HGNC Symbol;Acc:HGNC:25070]	-
ENSG00000076928	29.4522	34.3507	32.4578	38.7907	36.4956	40.7766	ARHGEF1	19	41883161	41930150	+	8636	protein_coding	Rho guanine nucleotide exchange factor 1 [Source:HGNC Symbol;Acc:HGNC:681]	-
ENSG00000165724	30.2368	50.2193	35.7117	34.6191	26.3994	34.8274	ZMYND19	9	137582081	137590512	-	2392	protein_coding	zinc finger MYND-type containing 19 [Source:HGNC Symbol;Acc:HGNC:21146]	-
ENSG00000100983	25.7973	54.4795	30.5331	37.1747	31.0147	32.6917	GSS	20	34928432	34956027	-	6166	protein_coding	glutathione synthetase [Source:HGNC Symbol;Acc:HGNC:4624]	-
ENSG00000275074	19.7066	32.3604	24.9794	36.9115	48.8871	48.2146	NUDT18	8	22106874	22109419	-	1754	protein_coding	nudix hydrolase 18 [Source:HGNC Symbol;Acc:HGNC:26194]	-
ENSG00000143420	36.4854	57.3362	43.2808	34.4789	16.5395	22.832	ENSA	1	150600851	150629612	-	5493	protein_coding	endosulfine alpha [Source:HGNC Symbol;Acc:HGNC:3360]	-
ENSG00000241360	25.1998	27.2391	25.5713	45.8397	36.955	50.0464	PDXP	22	37658723	37666932	+	2205	protein_coding	pyridoxal phosphatase [Source:HGNC Symbol;Acc:HGNC:30259]	-
ENSG00000104419	36.5892	46.4353	35.8772	26.7671	31.3433	33.8021	NDRG1	8	133237171	133302022	-	9823	protein_coding	N-myc downstream regulated 1 [Source:HGNC Symbol;Acc:HGNC:7679]	-
ENSG00000238227	29.3748	35.3002	30.5874	37.8369	36.5975	41.0151	TMEM250	9	136114581	136118875	-	3408	protein_coding	transmembrane protein 250 [Source:HGNC Symbol;Acc:HGNC:31009]	-
ENSG00000122359	25.8481	27.886	26.4589	43.9033	42.3523	44.1229	ANXA11	10	80150889	80205572	-	8513	protein_coding	annexin A11 [Source:HGNC Symbol;Acc:HGNC:535]	-
ENSG00000136425	19.1655	47.7758	24.3209	38.3415	38.9707	41.9013	CIB2	15	78104606	78131535	-	2137	protein_coding	calcium and integrin binding family member 2 [Source:HGNC Symbol;Acc:HGNC:24579]	-
ENSG00000105723	24.1758	31.4373	30.1579	37.8654	42.5438	44.1773	GSK3A	19	42230190	42242625	-	4122	protein_coding	glycogen synthase kinase 3 alpha [Source:HGNC Symbol;Acc:HGNC:4616]	-
ENSG00000102226	26.1416	30.7422	29.6201	38.9911	40.5627	44.2942	USP11	X	47232690	47248328	+	5269	protein_coding	ubiquitin specific peptidase 11 [Source:HGNC Symbol;Acc:HGNC:12609]	-
ENSG00000131669	24.2688	27.6579	28.9084	45.0316	43.4391	40.9519	NINJ1	9	93121496	93134251	-	2604	protein_coding	ninjurin 1 [Source:HGNC Symbol;Acc:HGNC:7824]	-
ENSG00000013364	30.5221	33.8758	32.1179	36.462	39.5974	37.5939	MVP	16	29820394	29848039	+	6141	protein_coding	major vault protein [Source:HGNC Symbol;Acc:HGNC:7531]	-
ENSG00000071553	27.4207	28.2339	31.9347	40.9912	37.5217	44.0153	ATP6AP1	X	154428645	154436516	+	4871	protein_coding	ATPase H+ transporting accessory protein 1 [Source:HGNC Symbol;Acc:HGNC:868]	-
ENSG00000120265	37.9286	65.0119	44.8555	26.3235	13.9609	22.019	PCMT1	6	149749443	149811420	+	2832	protein_coding	protein-L-isoaspartate (D-aspartate) O-methyltransferase [Source:HGNC Symbol;Acc:HGNC:8728]	-
ENSG00000126767	25.4115	30.8341	27.1294	39.3911	43.6204	43.239	ELK1	X	47635521	47650604	-	3398	protein_coding	ETS transcription factor ELK1 [Source:HGNC Symbol;Acc:HGNC:3321]	ETS
ENSG00000166681	30.3142	44.4575	37.3692	41.1047	25.4961	30.8805	BEX3	X	103376340	103378077	+	1080	protein_coding	brain expressed X-linked 3 [Source:HGNC Symbol;Acc:HGNC:13388]	-
ENSG00000062485	31.0246	24.6502	31.5024	38.2755	34.9576	49.1692	CS	12	56271699	56300391	-	6401	protein_coding	citrate synthase [Source:HGNC Symbol;Acc:HGNC:2422]	-
ENSG00000186907	27.0025	22.7191	27.6285	43.3699	42.3636	46.4384	RTN4RL2	11	57460528	57477534	+	2408	protein_coding	reticulon 4 receptor like 2 [Source:HGNC Symbol;Acc:HGNC:23053]	-
ENSG00000189306	19.3136	45.2961	23.7822	33.2857	43.5661	44.0917	RRP7A	22	42508344	42519796	-	5700	protein_coding	ribosomal RNA processing 7 homolog A [Source:HGNC Symbol;Acc:HGNC:24286]	-
ENSG00000119888	47.0428	44.6405	36.3334	31.1141	26.2038	23.698	EPCAM	2	47345158	47387601	+	2519	protein_coding	epithelial cell adhesion molecule [Source:HGNC Symbol;Acc:HGNC:11529]	-
ENSG00000135069	44.2866	23.869	35.3237	42.1961	45.658	17.5956	PSAT1	9	78297125	78330093	+	2206	protein_coding	phosphoserine aminotransferase 1 [Source:HGNC Symbol;Acc:HGNC:19129]	-
ENSG00000160752	35.2401	64.1378	35.9064	29.2811	18.7792	24.9694	FDPS	1	155308748	155320666	+	3718	protein_coding	farnesyl diphosphate synthase [Source:HGNC Symbol;Acc:HGNC:3631]	-
ENSG00000141524	24.4275	42.9499	31.2573	34.6765	43.3951	31.448	TMC6	17	78110458	78132407	-	8669	protein_coding	transmembrane channel like 6 [Source:HGNC Symbol;Acc:HGNC:18021]	-
ENSG00000185651	31.4364	31.0662	36.6991	41.5947	28.7711	38.4645	UBE2L3	22	21549447	21624034	+	3838	protein_coding	ubiquitin conjugating enzyme E2 L3 [Source:HGNC Symbol;Acc:HGNC:12488]	-
ENSG00000106330	27.11	25.6792	21.7159	49.5784	42.1269	41.6837	MOSPD3	7	100612102	100615384	+	1696	protein_coding	motile sperm domain containing 3 [Source:HGNC Symbol;Acc:HGNC:25078]	-
ENSG00000008838	22.9883	23.0357	23.9588	41.6835	41.8957	54.2646	MED24	17	40019097	40061215	-	6962	protein_coding	mediator complex subunit 24 [Source:HGNC Symbol;Acc:HGNC:22963]	-
ENSG00000132819	27.7121	31.5354	30.8554	37.5023	35.4951	44.6317	RBM38	20	57391396	57409333	+	2697	protein_coding	RNA binding motif protein 38 [Source:HGNC Symbol;Acc:HGNC:15818]	-
ENSG00000184160	35.5869	37.1072	37.0096	31.5306	29.263	36.6241	ADRA2C	4	3766348	3768526	+	2179	protein_coding	adrenoceptor alpha 2C [Source:HGNC Symbol;Acc:HGNC:283]	-
ENSG00000154723	29.9114	53.4687	38.7177	32.6762	25.2543	26.956	ATP5PF	21	25716503	25735673	-	2043	protein_coding	ATP synthase peripheral stalk subunit F6 [Source:HGNC Symbol;Acc:HGNC:847]	-
ENSG00000100558	41.4418	55.6861	43.1521	23.4142	23.2688	19.9165	PLEK2	14	67386984	67412167	-	1569	protein_coding	pleckstrin 2 [Source:HGNC Symbol;Acc:HGNC:19238]	-
ENSG00000127948	33.2457	45.1693	38.2653	29.7343	27.3444	32.9451	POR	7	75899200	75986855	+	6042	protein_coding	cytochrome p450 oxidoreductase [Source:HGNC Symbol;Acc:HGNC:9208]	-
ENSG00000131467	31.2929	33.5234	31.8357	28.8371	32.2733	48.6811	PSME3	17	42824385	42843760	+	5154	protein_coding	proteasome activator subunit 3 [Source:HGNC Symbol;Acc:HGNC:9570]	-
ENSG00000125970	30.8424	38.2498	30.4894	40.6646	30.9778	35.1304	RALY	20	33993646	34108308	+	7513	protein_coding	RALY heterogeneous nuclear ribonucleoprotein [Source:HGNC Symbol;Acc:HGNC:15921]	-
ENSG00000116871	33.7534	28.2586	32.3285	39.9319	29.5567	42.4431	MAP7D1	1	36155579	36180849	+	5271	protein_coding	MAP7 domain containing 1 [Source:HGNC Symbol;Acc:HGNC:25514]	-
ENSG00000071859	34.2956	54.1698	36.6702	31.3697	23.2939	26.192	FAM50A	X	154444141	154450654	+	2552	protein_coding	family with sequence similarity 50 member A [Source:HGNC Symbol;Acc:HGNC:18786]	-
ENSG00000132004	16.5913	28.3481	20.6242	34.3627	56.8011	49.242	FBXW9	19	12688053	12696631	-	2103	protein_coding	F-box and WD repeat domain containing 9 [Source:HGNC Symbol;Acc:HGNC:28136]	-
ENSG00000244509	30.7096	38.4458	29.4164	36.0696	33.8735	37.2849	APOBEC3C	22	39014257	39020352	+	2644	protein_coding	apolipoprotein B mRNA editing enzyme catalytic subunit 3C [Source:HGNC Symbol;Acc:HGNC:17353]	-
ENSG00000198276	29.4453	56.4335	32.1981	31.6509	26.8168	28.9499	UCKL1	20	63939829	63956416	-	3185	protein_coding	uridine-cytidine kinase 1 like 1 [Source:HGNC Symbol;Acc:HGNC:15938]	-
ENSG00000144021	22.2751	43.7725	28.1232	34.3454	36.7872	40.1408	CIAO1	2	96266159	96274173	+	4828	protein_coding	cytosolic iron-sulfur assembly component 1 [Source:HGNC Symbol;Acc:HGNC:14280]	-
ENSG00000176014	36.0096	39.1313	33.9493	28.5956	25.657	41.975	TUBB6	18	12307669	12344320	+	3941	protein_coding	tubulin beta 6 class V [Source:HGNC Symbol;Acc:HGNC:20776]	-
ENSG00000130479	27.7503	24.3331	30.4455	36.7457	41.0746	44.712	MAP1S	19	17719242	17734513	+	4933	protein_coding	microtubule associated protein 1S [Source:HGNC Symbol;Acc:HGNC:15715]	-
ENSG00000175826	28.6998	32.8746	35.5574	34.5484	37.0399	36.1223	CTDNEP1	17	7243591	7252491	-	2636	protein_coding	CTD nuclear envelope phosphatase 1 [Source:HGNC Symbol;Acc:HGNC:19085]	-
ENSG00000134308	36.4119	19.9572	29.8571	33.5181	50.6411	34.371	YWHAQ	2	9583967	9630997	-	2701	protein_coding	tyrosine 3-monooxygenase/tryptophan 5-monooxygenase activation protein theta [Source:HGNC Symbol;Acc:HGNC:12854]	-
ENSG00000112759	28.7047	37.3375	29.1052	31.7528	34.3989	43.3894	SLC29A1	6	44219505	44234151	+	4410	protein_coding	solute carrier family 29 member 1 (Augustine blood group) [Source:HGNC Symbol;Acc:HGNC:11003]	-
ENSG00000122034	41.9257	64.7229	45.6505	22.7694	12.5349	16.8098	GTF3A	13	27424619	27435823	+	2926	protein_coding	general transcription factor IIIA [Source:HGNC Symbol;Acc:HGNC:4662]	zf-C2H2
ENSG00000168701	25.109	52.0391	31.7995	32.5092	26.4243	36.4244	TMEM208	16	67227103	67229278	+	1787	protein_coding	transmembrane protein 208 [Source:HGNC Symbol;Acc:HGNC:25015]	-
ENSG00000179403	19.8679	22.2189	20.9291	37.3261	44.3002	59.3166	VWA1	1	1434861	1442882	+	5065	protein_coding	von Willebrand factor A domain containing 1 [Source:HGNC Symbol;Acc:HGNC:30910]	-
ENSG00000112110	43.3836	52.5471	48.5808	25.7595	15.0203	18.4086	MRPL18	6	159789812	159798436	+	1374	protein_coding	mitochondrial ribosomal protein L18 [Source:HGNC Symbol;Acc:HGNC:14477]	-
ENSG00000196683	27.2268	61.0091	36.3577	35.2104	19.6972	24.1686	TOMM7	7	22812628	22822852	-	1751	protein_coding	translocase of outer mitochondrial membrane 7 [Source:HGNC Symbol;Acc:HGNC:21648]	-
ENSG00000167674	31.559	29.9221	28.4551	42.5904	28.106	42.961	HDGFL2	19	4472297	4502208	+	4286	protein_coding	HDGF like 2 [Source:HGNC Symbol;Acc:HGNC:14680]	-
ENSG00000187713	40.9536	46.6446	40.0171	30.9444	16.105	28.482	TMEM203	9	137204082	137205648	-	1567	protein_coding	transmembrane protein 203 [Source:HGNC Symbol;Acc:HGNC:28217]	-
ENSG00000123562	46.0564	27.7039	46.3066	29.9534	22.767	30.3491	MORF4L2	X	103675496	103688158	-	2648	protein_coding	mortality factor 4 like 2 [Source:HGNC Symbol;Acc:HGNC:16849]	-
ENSG00000168488	31.2059	24.1901	30.6456	38.1106	35.5979	43.2792	ATXN2L	16	28823035	28837237	+	6508	protein_coding	ataxin 2 like [Source:HGNC Symbol;Acc:HGNC:31326]	-
ENSG00000182180	39.0747	59.2841	41.782	25.023	15.3149	22.5442	MRPS16	10	73248843	73252693	-	2794	protein_coding	mitochondrial ribosomal protein S16 [Source:HGNC Symbol;Acc:HGNC:14048]	-
ENSG00000160753	22.9926	30.5266	28.9503	37.0874	39.14	44.1762	RUSC1	1	155320894	155331114	+	5429	protein_coding	RUN and SH3 domain containing 1 [Source:HGNC Symbol;Acc:HGNC:17153]	-
ENSG00000107719	28.1667	28.8064	31.3826	36.1589	37.4441	40.8383	PALD1	10	70478767	70568450	+	4610	protein_coding	phosphatase domain containing paladin 1 [Source:HGNC Symbol;Acc:HGNC:23530]	-
ENSG00000173621	24.0209	24.4291	26.8143	43.7729	34.3898	49.1839	LRFN4	11	66856647	66860475	+	3087	protein_coding	leucine rich repeat and fibronectin type III domain containing 4 [Source:HGNC Symbol;Acc:HGNC:28456]	-
ENSG00000217130	26.9776	58.7802	31.8852	30.8831	20.2703	33.6255	AL139100.1	6	34744176	34744673	+	498	processed_pseudogene	ribosomal protein S10 (RPS10) pseudogene	-
ENSG00000119559	20.5185	33.5435	23.7469	37.4501	40.061	47.0755	C19orf25	19	1461143	1479556	-	5111	protein_coding	chromosome 19 open reading frame 25 [Source:HGNC Symbol;Acc:HGNC:26711]	-
ENSG00000107331	23.0674	26.3929	26.2059	42.5656	42.8784	41.2462	ABCA2	9	137007234	137028922	-	11507	protein_coding	ATP binding cassette subfamily A member 2 [Source:HGNC Symbol;Acc:HGNC:32]	-
ENSG00000155229	27.2618	31.2816	27.9358	34.8564	36.9105	43.9866	MMS19	10	97458324	97498794	-	5763	protein_coding	MMS19 homolog, cytosolic iron-sulfur assembly component [Source:HGNC Symbol;Acc:HGNC:13824]	-
ENSG00000187017	18.8655	24.2242	22.6715	41.9947	49.4017	44.9597	ESPN	1	6424776	6461367	+	6952	protein_coding	espin [Source:HGNC Symbol;Acc:HGNC:13281]	-
ENSG00000159346	33.8764	41.7989	35.3043	34.1736	25.8877	31.0149	ADIPOR1	1	202940826	202958572	-	3113	protein_coding	adiponectin receptor 1 [Source:HGNC Symbol;Acc:HGNC:24040]	-
novel.37	28.261	38.7757	29.5743	29.9521	33.2619	42.2	-	10	102106667	102107536	+	870	-	- && - && -	-
ENSG00000161682	27.6765	26.2237	28.9317	44.8489	31.1195	43.1969	FAM171A2	17	44353215	44363853	-	3570	protein_coding	family with sequence similarity 171 member A2 [Source:HGNC Symbol;Acc:HGNC:30480]	-
ENSG00000125450	31.3593	62.1781	34.9517	24.3526	19.3309	29.4265	NUP85	17	75205659	75235758	+	5193	protein_coding	nucleoporin 85 [Source:HGNC Symbol;Acc:HGNC:8734]	-
ENSG00000099995	28.4843	24.6732	29.949	36.1757	34.7291	47.3697	SF3A1	22	30331988	30356919	-	6301	protein_coding	splicing factor 3a subunit 1 [Source:HGNC Symbol;Acc:HGNC:10765]	-
ENSG00000159202	35.7072	44.9117	36.4157	26.4647	25.4941	32.2556	UBE2Z	17	48908407	48929056	+	5715	protein_coding	ubiquitin conjugating enzyme E2 Z [Source:HGNC Symbol;Acc:HGNC:25847]	-
ENSG00000105676	21.4227	34.249	23.5308	34.525	39.1682	48.2086	ARMC6	19	19033575	19060311	+	4052	protein_coding	armadillo repeat containing 6 [Source:HGNC Symbol;Acc:HGNC:25049]	-
ENSG00000144591	26.7623	41.6435	31.4761	31.6153	34.8035	34.6777	GMPPA	2	219498867	219506989	+	5332	protein_coding	GDP-mannose pyrophosphorylase A [Source:HGNC Symbol;Acc:HGNC:22923]	-
ENSG00000062038	36.2047	34.532	38.7408	33.934	24.847	32.4494	CDH3	16	68636189	68722616	+	6076	protein_coding	cadherin 3 [Source:HGNC Symbol;Acc:HGNC:1762]	-
novel.724	26.492	43.2378	31.8458	33.0818	35.6467	29.9738	-	CHR_HSCHR6_MHC_COX_CTG1	32128345	32129264	+	741	-	- && Q99942.1 RecName: Full=E3 ubiquitin-protein ligase RNF5; AltName: Full=Protein G16; AltName: Full=RING finger protein 5; AltName: Full=Ram1 homolog; Short=HsRma1 && -	-
ENSG00000260260	25.5532	50.3638	33.1024	35.1513	22.3012	33.1887	SNHG19	16	2154797	2155358	-	342	lncRNA	small nucleolar RNA host gene 19 [Source:HGNC Symbol;Acc:HGNC:49574]	-
ENSG00000163132	39.4197	35.1765	37.9524	37.5225	21.9459	27.5173	MSX1	4	4859665	4863936	+	2121	protein_coding	msh homeobox 1 [Source:HGNC Symbol;Acc:HGNC:7391]	Homeobox
ENSG00000087191	31.1686	41.0667	34.2741	33.8235	27.1034	31.9951	PSMC5	17	63827152	63832026	+	4279	protein_coding	proteasome 26S subunit, ATPase 5 [Source:HGNC Symbol;Acc:HGNC:9552]	-
ENSG00000100591	39.5427	46.472	32.187	28.1052	20.0398	32.9143	AHSA1	14	77457870	77469472	+	2944	protein_coding	activator of HSP90 ATPase activity 1 [Source:HGNC Symbol;Acc:HGNC:1189]	-
ENSG00000100982	23.7249	32.494	25.6041	37.2524	41.5113	38.642	PCIF1	20	45934683	45948023	+	3164	protein_coding	PDX1 C-terminal inhibiting factor 1 [Source:HGNC Symbol;Acc:HGNC:16200]	-
ENSG00000132768	21.1902	26.7737	24.6382	33.947	40.8071	51.7476	DPH2	1	43970000	43973369	+	2930	protein_coding	diphthamide biosynthesis 2 [Source:HGNC Symbol;Acc:HGNC:3004]	-
ENSG00000169718	25.5588	37.8316	30.0229	35.657	32.4764	37.5144	DUS1L	17	82057506	82065887	-	5999	protein_coding	dihydrouridine synthase 1 like [Source:HGNC Symbol;Acc:HGNC:30086]	-
ENSG00000119431	18.3415	44.9832	24.1668	29.8633	38.7372	42.9377	HDHD3	9	113373419	113376999	-	2105	protein_coding	haloacid dehalogenase like hydrolase domain containing 3 [Source:HGNC Symbol;Acc:HGNC:28171]	-
ENSG00000130669	26.8846	26.2155	27.4628	42.6278	33.1836	42.5707	PAK4	19	39125770	39182816	+	7115	protein_coding	p21 (RAC1) activated kinase 4 [Source:HGNC Symbol;Acc:HGNC:16059]	-
ENSG00000160688	22.8644	40.326	25.4799	36.5799	32.1081	41.509	FLAD1	1	154983338	154993111	+	4019	protein_coding	flavin adenine dinucleotide synthetase 1 [Source:HGNC Symbol;Acc:HGNC:24671]	-
ENSG00000100294	26.8624	33.0982	28.7714	36.6586	31.4796	41.8513	MCAT	22	43132209	43143398	-	2389	protein_coding	malonyl-CoA-acyl carrier protein transacylase [Source:HGNC Symbol;Acc:HGNC:29622]	-
ENSG00000136699	26.3789	23.2946	26.8834	35.5792	36.9945	49.2592	SMPD4	2	130151392	130182750	-	7375	protein_coding	sphingomyelin phosphodiesterase 4 [Source:HGNC Symbol;Acc:HGNC:32949]	-
ENSG00000103855	26.8866	32.6246	31.8083	31.1301	36.7361	39.1607	CD276	15	73683966	73714514	+	5482	protein_coding	CD276 molecule [Source:HGNC Symbol;Acc:HGNC:19137]	-
ENSG00000180891	30.2608	39.488	33.6038	33.6277	30.0399	30.9641	CUEDC1	17	57861243	57955412	-	5666	protein_coding	CUE domain containing 1 [Source:HGNC Symbol;Acc:HGNC:31350]	-
ENSG00000185187	19.2146	34.6924	24.3712	44.1077	39.6385	35.8742	SIGIRR	11	405716	417455	-	3496	protein_coding	single Ig and TIR domain containing [Source:HGNC Symbol;Acc:HGNC:30575]	-
ENSG00000065717	18.7953	24.021	23.9139	40.6362	47.7027	42.7987	TLE2	19	2997639	3047635	-	4150	protein_coding	TLE family member 2, transcriptional corepressor [Source:HGNC Symbol;Acc:HGNC:11838]	-
ENSG00000011478	24.6372	31.0121	28.7675	37.48	37.0495	38.8792	QPCTL	19	45692666	45703989	+	2213	protein_coding	glutaminyl-peptide cyclotransferase like [Source:HGNC Symbol;Acc:HGNC:25952]	-
ENSG00000091542	32.8172	36.5558	30.8465	34.5035	25.8213	36.8906	ALKBH5	17	18183078	18209954	+	3601	protein_coding	alkB homolog 5, RNA demethylase [Source:HGNC Symbol;Acc:HGNC:25996]	-
ENSG00000203760	28.8763	61.9668	42.1661	24.6678	16.0131	22.7381	CENPW	6	126340174	126348875	+	795	protein_coding	centromere protein W [Source:HGNC Symbol;Acc:HGNC:21488]	-
ENSG00000135926	32.7433	52.149	34.9307	25.1209	23.3332	28.1058	TMBIM1	2	218274197	218292586	-	5093	protein_coding	transmembrane BAX inhibitor motif containing 1 [Source:HGNC Symbol;Acc:HGNC:23410]	-
ENSG00000100129	31.4551	32.3245	29.0391	31.8762	34.8549	36.7939	EIF3L	22	37848868	37889407	+	4296	protein_coding	eukaryotic translation initiation factor 3 subunit L [Source:HGNC Symbol;Acc:HGNC:18138]	-
ENSG00000254858	27.3113	35.7578	24.1658	33.5003	31.7143	43.728	MPV17L2	19	18193218	18196948	+	2099	protein_coding	MPV17 mitochondrial inner membrane protein like 2 [Source:HGNC Symbol;Acc:HGNC:28177]	-
ENSG00000087365	33.1848	33.3293	32.0771	33.2614	26.5147	37.554	SF3B2	11	66050729	66069308	+	9795	protein_coding	splicing factor 3b subunit 2 [Source:HGNC Symbol;Acc:HGNC:10769]	-
ENSG00000260001	20.3913	29.1991	23.2759	36.5041	44.2064	42.3348	TGFBR3L	19	7916145	7919097	+	1516	protein_coding	transforming growth factor beta receptor 3 like [Source:HGNC Symbol;Acc:HGNC:44152]	-
ENSG00000182004	20.7255	39.5598	31.3845	32.6439	35.6978	35.8746	SNRPE	1	203861599	203871152	+	2080	protein_coding	small nuclear ribonucleoprotein polypeptide E [Source:HGNC Symbol;Acc:HGNC:11161]	-
ENSG00000172830	20.3727	28.5705	25.5902	37.6255	42.5384	40.9796	SSH3	11	67303478	67312607	+	3611	protein_coding	slingshot protein phosphatase 3 [Source:HGNC Symbol;Acc:HGNC:30581]	-
ENSG00000270170	32.0842	47.3925	34.9821	30.1064	21.3366	29.4756	NCBP2AS2	3	196942674	196943543	+	870	protein_coding	NCBP2 antisense 2 (head to head) [Source:HGNC Symbol;Acc:HGNC:25121]	-
ENSG00000166710	36.1117	72.4799	55.8212	16.5057	4.73262	9.69314	B2M	15	44711487	44718877	+	6079	protein_coding	beta-2-microglobulin [Source:HGNC Symbol;Acc:HGNC:914]	-
ENSG00000176428	15.459	26.994	18.8775	43.53	47.4266	42.9905	VPS37D	7	73667831	73672112	+	1620	protein_coding	VPS37D subunit of ESCRT-I [Source:HGNC Symbol;Acc:HGNC:18287]	-
ENSG00000160606	21.723	37.8091	27.7875	36.4959	30.5172	40.8013	TLCD1	17	28724348	28727935	-	1336	protein_coding	TLC domain containing 1 [Source:HGNC Symbol;Acc:HGNC:25177]	-
ENSG00000129245	32.6014	40.2496	33.07	31.7382	27.0945	30.377	FXR2	17	7591230	7614897	-	4357	protein_coding	FMR1 autosomal homolog 2 [Source:HGNC Symbol;Acc:HGNC:4024]	-
ENSG00000141994	19.2652	28.4287	22.3031	42.6948	41.7247	40.6218	DUS3L	19	5784832	5791225	-	3629	protein_coding	dihydrouridine synthase 3 like [Source:HGNC Symbol;Acc:HGNC:26920]	-
ENSG00000104833	17.1349	17.5442	18.9034	37.2929	45.9447	58.1626	TUBB4A	19	6494319	6502848	-	3220	protein_coding	tubulin beta 4A class IVa [Source:HGNC Symbol;Acc:HGNC:20774]	-
ENSG00000109255	30.435	35.6067	34.08	27.002	32.7859	34.6372	NMU	4	55595229	55636698	-	975	protein_coding	neuromedin U [Source:HGNC Symbol;Acc:HGNC:7859]	-
ENSG00000131981	33.3059	58.1172	40.5509	23.4863	18.7192	20.2006	LGALS3	14	55124110	55145423	+	2199	protein_coding	galectin 3 [Source:HGNC Symbol;Acc:HGNC:6563]	-
ENSG00000162063	27.9106	29.5788	29.3284	33.7559	29.5472	44.0779	CCNF	16	2429394	2458854	+	6309	protein_coding	cyclin F [Source:HGNC Symbol;Acc:HGNC:1591]	-
ENSG00000185834	34.9053	58.0007	30.914	24.594	22.455	23.261	RPL12P4	20	55074644	55075140	+	497	processed_pseudogene	ribosomal protein L12 pseudogene 4 [Source:HGNC Symbol;Acc:HGNC:16587]	-
ENSG00000102978	32.0218	52.6077	32.4252	27.0401	22.7323	27.0627	POLR2C	16	57462660	57472009	+	3666	protein_coding	RNA polymerase II subunit C [Source:HGNC Symbol;Acc:HGNC:9189]	-
ENSG00000139343	28.6332	53.5532	36.5754	25.668	21.452	27.8832	SNRPF	12	95858928	95903828	+	3043	protein_coding	small nuclear ribonucleoprotein polypeptide F [Source:HGNC Symbol;Acc:HGNC:11162]	-
ENSG00000177542	29.7064	25.5986	31.5171	30.5182	32.3915	44.006	SLC25A22	11	790475	798281	-	4595	protein_coding	solute carrier family 25 member 22 [Source:HGNC Symbol;Acc:HGNC:19954]	-
ENSG00000141756	26.6335	42.9415	31.4663	34.4369	31.6432	26.4814	FKBP10	17	41812680	41823217	+	4273	protein_coding	FKBP prolyl isomerase 10 [Source:HGNC Symbol;Acc:HGNC:18169]	-
ENSG00000162734	37.3271	53.5283	41.027	23.7431	16.5085	21.424	PEA15	1	160205337	160215376	+	2806	protein_coding	proliferation and apoptosis adaptor protein 15 [Source:HGNC Symbol;Acc:HGNC:8822]	-
ENSG00000147889	22.1159	48.9624	28.6479	31.3385	32.3998	30.088	CDKN2A	9	21967753	21995301	-	4329	protein_coding	cyclin dependent kinase inhibitor 2A [Source:HGNC Symbol;Acc:HGNC:1787]	-
ENSG00000134690	35.4008	36.9446	32.9068	27.1322	25.2435	35.7314	CDCA8	1	37692481	37709719	+	2406	protein_coding	cell division cycle associated 8 [Source:HGNC Symbol;Acc:HGNC:14629]	-
ENSG00000241468	23.2204	34.9529	24.1705	49.3593	27.3626	34.2779	ATP5MF	7	99448475	99466331	-	2275	protein_coding	ATP synthase membrane subunit f [Source:HGNC Symbol;Acc:HGNC:848]	-
ENSG00000158470	56.9171	31.4684	48.5262	19.7556	19.335	17.1824	B4GALT5	20	49632945	49713878	-	4722	protein_coding	beta-1,4-galactosyltransferase 5 [Source:HGNC Symbol;Acc:HGNC:928]	-
ENSG00000114115	27.657	54.0959	30.6478	35.2743	20.9388	24.5272	RBP1	3	139517434	139539829	-	3905	protein_coding	retinol binding protein 1 [Source:HGNC Symbol;Acc:HGNC:9919]	-
ENSG00000023892	24.7317	35.6775	28.191	35.8328	32.4005	36.2414	DEF6	6	35297818	35321771	+	2579	protein_coding	DEF6 guanine nucleotide exchange factor [Source:HGNC Symbol;Acc:HGNC:2760]	-
ENSG00000117632	40.0891	46.8443	36.939	26.6298	21.0517	20.6258	STMN1	1	25884181	25906991	-	6247	protein_coding	stathmin 1 [Source:HGNC Symbol;Acc:HGNC:6510]	-
ENSG00000172046	23.9994	28.7869	28.6191	35.1821	33.827	41.6374	USP19	3	49108046	49120938	-	5723	protein_coding	ubiquitin specific peptidase 19 [Source:HGNC Symbol;Acc:HGNC:12617]	-
ENSG00000154832	27.8297	33.6608	31.8461	32.1108	30.4492	35.9977	CXXC1	18	50282343	50288304	-	4319	protein_coding	CXXC finger protein 1 [Source:HGNC Symbol;Acc:HGNC:24343]	-
ENSG00000127554	18.1818	40.1126	20.8482	38.5906	34.965	39.1959	GFER	16	1984193	1987749	+	2701	protein_coding	growth factor, augmenter of liver regeneration [Source:HGNC Symbol;Acc:HGNC:4236]	-
ENSG00000214022	25.6438	25.4933	27.182	35.1188	33.5594	44.7759	REPIN1	7	150368189	150374044	+	4649	protein_coding	replication initiator 1 [Source:HGNC Symbol;Acc:HGNC:17922]	zf-C2H2
ENSG00000105552	24.8094	38.3601	23.9285	34.7825	32.5425	36.8714	BCAT2	19	48795062	48811029	-	4553	protein_coding	branched chain amino acid transaminase 2 [Source:HGNC Symbol;Acc:HGNC:977]	-
ENSG00000105953	30.0678	30.1311	33.3279	31.8787	28.6433	37.2245	OGDH	7	44606572	44709066	+	5210	protein_coding	oxoglutarate dehydrogenase [Source:HGNC Symbol;Acc:HGNC:8124]	-
ENSG00000221867	36.4896	38.3056	35.492	23.1823	23.122	34.3409	MAGEA3	X	152698767	152702347	+	1773	protein_coding	MAGE family member A3 [Source:HGNC Symbol;Acc:HGNC:6801]	-
ENSG00000140854	18.1145	21.2387	21.029	38.8639	49.3406	42.3054	KATNB1	16	57735739	57757244	+	4576	protein_coding	katanin regulatory subunit B1 [Source:HGNC Symbol;Acc:HGNC:6217]	-
ENSG00000105290	21.5133	28.0723	28.6331	40.6527	35.4188	36.5656	APLP1	19	35867899	35879791	+	3656	protein_coding	amyloid beta precursor like protein 1 [Source:HGNC Symbol;Acc:HGNC:597]	-
ENSG00000181588	39.9087	26.6484	34.7962	33.5331	25.6792	30.2631	MEX3D	19	1554669	1568058	-	2850	protein_coding	mex-3 RNA binding family member D [Source:HGNC Symbol;Acc:HGNC:16734]	-
ENSG00000182872	28.7091	30.8083	31.1761	34.5012	28.3814	37.1421	RBM10	X	47145221	47186813	+	3537	protein_coding	RNA binding motif protein 10 [Source:HGNC Symbol;Acc:HGNC:9896]	-
ENSG00000185813	21.7676	38.7805	22.8843	28.21	38.3469	39.863	PCYT2	17	81900965	81911464	-	6897	protein_coding	phosphate cytidylyltransferase 2, ethanolamine [Source:HGNC Symbol;Acc:HGNC:8756]	-
ENSG00000090432	30.9435	49.9158	35.3033	24.0649	19.9102	29.6651	MUL1	1	20499448	20508151	-	2428	protein_coding	mitochondrial E3 ubiquitin protein ligase 1 [Source:HGNC Symbol;Acc:HGNC:25762]	-
ENSG00000005194	27.8183	43.4752	30.2919	29.5205	22.8933	35.6434	CIAPIN1	16	57428187	57447420	-	3383	protein_coding	cytokine induced apoptosis inhibitor 1 [Source:HGNC Symbol;Acc:HGNC:28050]	-
ENSG00000096092	35.1173	54.7397	39.5096	20.3929	16.5178	23.1186	TMEM14A	6	52671113	52686588	+	988	protein_coding	transmembrane protein 14A [Source:HGNC Symbol;Acc:HGNC:21076]	-
ENSG00000189171	17.982	50.7846	26.4064	26.4278	34.5951	33.1354	S100A13	1	153618787	153631360	-	2216	protein_coding	S100 calcium binding protein A13 [Source:HGNC Symbol;Acc:HGNC:10490]	-
ENSG00000186577	23.8013	37.0183	29.2713	39.159	35.9748	23.9558	SMIM29	6	34246381	34249108	-	1866	protein_coding	small integral membrane protein 29 [Source:HGNC Symbol;Acc:HGNC:1340]	-
ENSG00000105698	23.6559	35.1917	26.1025	34.5266	35.1748	34.4542	USF2	19	35268962	35279821	+	4968	protein_coding	upstream transcription factor 2, c-fos interacting [Source:HGNC Symbol;Acc:HGNC:12594]	bHLH
ENSG00000088325	36.8874	20.3742	30.6492	29.8077	36.791	34.3425	TPX2	20	31739271	31801805	+	3605	protein_coding	TPX2 microtubule nucleation factor [Source:HGNC Symbol;Acc:HGNC:1249]	-
ENSG00000168884	28.6742	43.8152	32.4046	28.1355	25.7355	30.0127	TNIP2	4	2741648	2756342	-	2652	protein_coding	TNFAIP3 interacting protein 2 [Source:HGNC Symbol;Acc:HGNC:19118]	-
ENSG00000078061	21.9914	30.5732	25.6412	34.6917	36.5201	39.165	ARAF	X	47561100	47571920	+	3535	protein_coding	A-Raf proto-oncogene, serine/threonine kinase [Source:HGNC Symbol;Acc:HGNC:646]	-
ENSG00000205937	28.5628	24.1266	28.7377	34.2976	31.2514	41.244	RNPS1	16	2253116	2268397	-	8567	protein_coding	RNA binding protein with serine rich domain 1 [Source:HGNC Symbol;Acc:HGNC:10080]	-
ENSG00000129625	27.8004	52.5278	34.2223	25.7725	20.3636	27.4336	REEP5	5	112876385	112922289	-	3974	protein_coding	receptor accessory protein 5 [Source:HGNC Symbol;Acc:HGNC:30077]	-
ENSG00000128245	38.8526	30.4823	37.8937	27.3191	24.4769	29.0863	YWHAH	22	31944522	31957603	+	2392	protein_coding	tyrosine 3-monooxygenase/tryptophan 5-monooxygenase activation protein eta [Source:HGNC Symbol;Acc:HGNC:12853]	-
ENSG00000089820	19.7056	24.6785	24.1355	38.5511	43.0859	37.4559	ARHGAP4	X	153907367	153934999	-	5580	protein_coding	Rho GTPase activating protein 4 [Source:HGNC Symbol;Acc:HGNC:674]	-
ENSG00000177830	24.1692	36.038	26.3654	37.7097	30.055	33.2217	CHID1	11	867859	915058	-	5359	protein_coding	chitinase domain containing 1 [Source:HGNC Symbol;Acc:HGNC:28474]	-
ENSG00000142949	36.6333	26.9186	32.7007	36.1195	23.7423	30.7483	PTPRF	1	43525187	43623666	+	10712	protein_coding	protein tyrosine phosphatase receptor type F [Source:HGNC Symbol;Acc:HGNC:9670]	-
ENSG00000068001	22.8506	36.7197	22.4979	33.8309	33.4127	37.4652	HYAL2	3	50317790	50322782	-	4421	protein_coding	hyaluronidase 2 [Source:HGNC Symbol;Acc:HGNC:5321]	-
ENSG00000129351	33.3367	28.3477	31.5676	34.8477	26.9568	31.5171	ILF3	19	10654261	10692417	+	11022	protein_coding	interleukin enhancer binding factor 3 [Source:HGNC Symbol;Acc:HGNC:6038]	-
ENSG00000141510	26.9677	27.3793	28.3041	35.3042	37.2296	31.374	TP53	17	7661779	7687550	-	5688	protein_coding	tumor protein p53 [Source:HGNC Symbol;Acc:HGNC:11998]	P53
ENSG00000136997	37.2612	24.5893	33.453	31.2801	26.1565	33.6263	MYC	8	127735434	127742951	+	4584	protein_coding	MYC proto-oncogene, bHLH transcription factor [Source:HGNC Symbol;Acc:HGNC:7553]	bHLH
ENSG00000149743	19.5948	41.796	30.8689	32.9725	32.3291	28.7552	TRPT1	11	64223799	64226254	-	2210	protein_coding	tRNA phosphotransferase 1 [Source:HGNC Symbol;Acc:HGNC:20316]	-
ENSG00000100379	17.2993	22.5196	19.447	37.6543	45.2715	44.0861	KCTD17	22	37051736	37063390	+	2786	protein_coding	potassium channel tetramerization domain containing 17 [Source:HGNC Symbol;Acc:HGNC:25705]	-
ENSG00000166197	34.1202	18.2762	28.4609	30.8905	35.9512	38.5445	NOLC1	10	102152176	102163871	+	3970	protein_coding	nucleolar and coiled-body phosphoprotein 1 [Source:HGNC Symbol;Acc:HGNC:15608]	-
ENSG00000249992	30.676	30.7119	36.918	36.6397	24.5008	26.7262	TMEM158	3	45224466	45226287	-	1822	protein_coding	transmembrane protein 158 (gene/pseudogene) [Source:HGNC Symbol;Acc:HGNC:30293]	-
ENSG00000099622	28.3894	36.7045	29.022	33.4643	30.0661	28.3979	CIRBP	19	1259384	1274880	+	6368	protein_coding	cold inducible RNA binding protein [Source:HGNC Symbol;Acc:HGNC:1982]	-
ENSG00000168288	33.0336	44.3322	40.3126	24.5526	18.3111	25.4189	MMADHC	2	149569637	149587778	-	2150	protein_coding	metabolism of cobalamin associated D [Source:HGNC Symbol;Acc:HGNC:25221]	-
ENSG00000107130	26.8059	28.7736	25.2088	31.5145	33.8519	39.7274	NCS1	9	130172404	130237303	+	5462	protein_coding	neuronal calcium sensor 1 [Source:HGNC Symbol;Acc:HGNC:3953]	-
ENSG00000228532	36.2321	35.0165	39.0539	25.1852	16.9412	33.3295	AC005000.1	X	115718942	115719229	-	288	processed_pseudogene	small ubiquitin-like modifier 2 (SUMO2) pseudogene	-
ENSG00000178821	17.9757	21.4747	19.3432	37.6519	40.5887	48.4762	TMEM52	1	1917590	1919279	-	1600	protein_coding	transmembrane protein 52 [Source:HGNC Symbol;Acc:HGNC:27916]	-
ENSG00000213015	16.3545	21.626	21.2014	37.1653	43.4391	45.5799	ZNF580	19	55635016	55643470	+	2604	protein_coding	zinc finger protein 580 [Source:HGNC Symbol;Acc:HGNC:29473]	zf-C2H2
ENSG00000102172	40.0449	34.0948	36.5026	22.2432	27.6807	24.7268	SMS	X	21940709	21994837	+	2026	protein_coding	spermine synthase [Source:HGNC Symbol;Acc:HGNC:11123]	-
ENSG00000165175	31.1978	38.6417	28.4354	29.416	24.4152	33.1653	MID1IP1	X	38801432	38806537	+	3790	protein_coding	MID1 interacting protein 1 [Source:HGNC Symbol;Acc:HGNC:20715]	-
ENSG00000125445	30.3448	46.8895	31.5972	26.1415	20.3793	29.8624	MRPS7	17	75261674	75266376	+	3327	protein_coding	mitochondrial ribosomal protein S7 [Source:HGNC Symbol;Acc:HGNC:14499]	-
ENSG00000071564	29.4069	24.5609	28.8741	37.6606	27.8656	36.6317	TCF3	19	1609290	1652615	-	6090	protein_coding	transcription factor 3 [Source:HGNC Symbol;Acc:HGNC:11633]	bHLH
ENSG00000164687	34.3558	38.1544	32.5481	30.8289	20.6769	28.3351	FABP5	8	81280536	81284777	+	1904	protein_coding	fatty acid binding protein 5 [Source:HGNC Symbol;Acc:HGNC:3560]	-
ENSG00000104774	21.7474	28.1487	25.0197	37.0295	38.257	34.6805	MAN2B1	19	12646511	12666742	-	5374	protein_coding	mannosidase alpha class 2B member 1 [Source:HGNC Symbol;Acc:HGNC:6826]	-
ENSG00000105325	23.6791	27.6468	27.6168	32.6468	33.7468	39.4499	FZR1	19	3506273	3538330	+	6511	protein_coding	fizzy and cell division cycle 20 related 1 [Source:HGNC Symbol;Acc:HGNC:24824]	-
ENSG00000103253	11.1636	28.747	17.1165	37.7659	49.2499	40.6581	HAGHL	16	726936	735525	+	5287	protein_coding	hydroxyacylglutathione hydrolase like [Source:HGNC Symbol;Acc:HGNC:14177]	-
ENSG00000106009	22.5472	23.5519	25.8668	33.0418	35.9447	43.721	BRAT1	7	2537810	2555694	-	6673	protein_coding	BRCA1 associated ATM activator 1 [Source:HGNC Symbol;Acc:HGNC:21701]	-
ENSG00000169583	28.7389	38.7744	30.0425	29.1098	26.6226	31.381	CLIC3	9	136994608	136996568	-	969	protein_coding	chloride intracellular channel 3 [Source:HGNC Symbol;Acc:HGNC:2064]	-
ENSG00000140365	20.2911	35.4701	24.4528	36.1354	33.7667	34.4425	COMMD4	15	75336020	75343224	+	6650	protein_coding	COMM domain containing 4 [Source:HGNC Symbol;Acc:HGNC:26027]	-
ENSG00000117748	34.5019	45.1859	40.3747	24.8165	16.193	23.4139	RPA2	1	27891524	27914746	-	1981	protein_coding	replication protein A2 [Source:HGNC Symbol;Acc:HGNC:10290]	-
ENSG00000135632	22.7215	33.4804	27.0758	28.5293	31.4414	41.2184	SMYD5	2	73214222	73227221	+	3364	protein_coding	SMYD family member 5 [Source:HGNC Symbol;Acc:HGNC:16258]	-
ENSG00000167863	26.5837	48.2274	38.7247	31.8238	19.0235	20.0805	ATP5PD	17	75038863	75046985	-	3231	protein_coding	ATP synthase peripheral stalk subunit d [Source:HGNC Symbol;Acc:HGNC:845]	-
ENSG00000213465	26.7018	42.5855	23.0969	35.0145	31.8536	25.1092	ARL2	11	65014160	65022184	+	2037	protein_coding	ADP ribosylation factor like GTPase 2 [Source:HGNC Symbol;Acc:HGNC:693]	-
ENSG00000101132	13.1708	45.0068	19.9072	28.7446	44.6911	32.6407	PFDN4	20	54208087	54228052	+	1743	protein_coding	prefoldin subunit 4 [Source:HGNC Symbol;Acc:HGNC:8868]	-
ENSG00000160803	26.7151	31.1119	25.9302	29.0326	30.7695	40.1557	UBQLN4	1	156035299	156053798	-	3884	protein_coding	ubiquilin 4 [Source:HGNC Symbol;Acc:HGNC:1237]	-
ENSG00000178149	22.3998	35.5433	26.645	38.3905	31.2508	29.482	DALRD3	3	49015488	49022293	-	3686	protein_coding	DALR anticodon binding domain containing 3 [Source:HGNC Symbol;Acc:HGNC:25536]	-
ENSG00000213593	29.4681	42.2263	31.2912	29.9882	20.7846	29.9479	TMX2	11	57712593	57740973	+	2253	protein_coding	thioredoxin related transmembrane protein 2 [Source:HGNC Symbol;Acc:HGNC:30739]	-
ENSG00000169021	29.3121	38.2316	31.6111	28.5095	23.1521	32.8756	UQCRFS1	19	29205320	29213151	-	3086	protein_coding	ubiquinol-cytochrome c reductase, Rieske iron-sulfur polypeptide 1 [Source:HGNC Symbol;Acc:HGNC:12587]	-
ENSG00000099899	19.8754	27.6269	23.9094	35.1769	36.3804	40.6143	TRMT2A	22	20111875	20117392	-	3954	protein_coding	tRNA methyltransferase 2 homolog A [Source:HGNC Symbol;Acc:HGNC:24974]	-
ENSG00000089159	26.9876	30.9249	29.7699	32.9951	29.9425	32.9568	PXN	12	120210439	120265771	-	7460	protein_coding	paxillin [Source:HGNC Symbol;Acc:HGNC:9718]	-
ENSG00000101152	31.1503	38.0668	32.8835	28.3198	21.6641	31.4722	DNAJC5	20	63895126	63936031	+	5343	protein_coding	DnaJ heat shock protein family (Hsp40) member C5 [Source:HGNC Symbol;Acc:HGNC:16235]	-
ENSG00000141759	26.8522	41.7232	31.0849	24.4981	27.1214	32.1517	TXNL4A	18	79970813	80033949	-	5217	protein_coding	thioredoxin like 4A [Source:HGNC Symbol;Acc:HGNC:30551]	-
ENSG00000144028	28.8607	19.6232	26.7691	34.6728	31.1534	42.3158	SNRNP200	2	96274338	96321271	-	11188	protein_coding	small nuclear ribonucleoprotein U5 subunit 200 [Source:HGNC Symbol;Acc:HGNC:30859]	-
ENSG00000127054	25.1112	35.8937	28.7524	34.716	29.7871	29.0659	INTS11	1	1311585	1324691	-	8220	protein_coding	integrator complex subunit 11 [Source:HGNC Symbol;Acc:HGNC:26052]	-
ENSG00000130244	19.5455	38.6446	27.4196	32.7477	35.0049	29.9125	FAM98C	19	38403135	38409088	+	4598	protein_coding	family with sequence similarity 98 member C [Source:HGNC Symbol;Acc:HGNC:27119]	-
ENSG00000169733	18.5782	25.3074	25.2398	36.821	40.2362	37.0538	RFNG	17	82047902	82051831	-	3865	protein_coding	RFNG O-fucosylpeptide 3-beta-N-acetylglucosaminyltransferase [Source:HGNC Symbol;Acc:HGNC:9974]	-
ENSG00000253626	24.5076	50.4098	29.8839	23.9434	25.7768	28.7011	EIF5AL1	10	79512601	79516440	+	3840	protein_coding	eukaryotic translation initiation factor 5A like 1 [Source:HGNC Symbol;Acc:HGNC:17419]	-
ENSG00000017483	26.2949	33.8503	29.5114	29.6523	29.6596	33.9513	SLC38A5	X	48458537	48470260	-	4018	protein_coding	solute carrier family 38 member 5 [Source:HGNC Symbol;Acc:HGNC:18070]	-
ENSG00000131495	25.1141	54.0992	26.777	35.837	19.259	21.7069	NDUFA2	5	140638740	140647785	-	1488	protein_coding	NADH:ubiquinone oxidoreductase subunit A2 [Source:HGNC Symbol;Acc:HGNC:7685]	-
ENSG00000125868	40.0017	38.1605	37.3121	24.214	22.3307	20.7172	DSTN	20	17570075	17609919	+	3639	protein_coding	destrin, actin depolymerizing factor [Source:HGNC Symbol;Acc:HGNC:15750]	-
ENSG00000132182	29.1749	26.6593	29.7372	37.8459	25.6419	33.6602	NUP210	3	13316235	13420322	-	8195	protein_coding	nucleoporin 210 [Source:HGNC Symbol;Acc:HGNC:30052]	-
ENSG00000063046	30.5715	21.1134	28.0967	35.6674	36.0156	31.1336	EIF4B	12	53006158	53042209	+	6146	protein_coding	eukaryotic translation initiation factor 4B [Source:HGNC Symbol;Acc:HGNC:3285]	-
ENSG00000174996	23.3184	25.394	24.1779	35.3883	36.2751	37.8906	KLC2	11	66257294	66267860	+	5479	protein_coding	kinesin light chain 2 [Source:HGNC Symbol;Acc:HGNC:20716]	-
ENSG00000175197	35.8773	67.8048	42.353	17.9335	13.6019	4.44942	DDIT3	12	57516588	57521737	-	1307	protein_coding	DNA damage inducible transcript 3 [Source:HGNC Symbol;Acc:HGNC:2726]	TF_bZIP
ENSG00000158195	33.1772	26.8004	31.0564	31.1627	26.8016	32.8063	WASF2	1	27404230	27490167	-	5681	protein_coding	WASP family member 2 [Source:HGNC Symbol;Acc:HGNC:12733]	-
ENSG00000125967	16.372	24.3565	21.1973	35.9159	45.49	38.2759	NECAB3	20	33657087	33674463	-	4342	protein_coding	N-terminal EF-hand calcium binding protein 3 [Source:HGNC Symbol;Acc:HGNC:15851]	-
ENSG00000116260	26.021	32.0384	28.8394	33.6672	28.2219	32.8042	QSOX1	1	180154869	180204030	+	9276	protein_coding	quiescin sulfhydryl oxidase 1 [Source:HGNC Symbol;Acc:HGNC:9756]	-
ENSG00000076201	23.0636	22.1359	23.4504	34.3053	33.8082	44.7126	PTPN23	3	47381011	47413435	+	5975	protein_coding	protein tyrosine phosphatase non-receptor type 23 [Source:HGNC Symbol;Acc:HGNC:14406]	-
ENSG00000105323	29.1828	20.194	27.1046	37.4096	30.0563	37.4043	HNRNPUL1	19	41262496	41307787	+	6691	protein_coding	heterogeneous nuclear ribonucleoprotein U like 1 [Source:HGNC Symbol;Acc:HGNC:17011]	-
ENSG00000100106	21.3701	26.2487	25.8192	41.9967	34.0425	31.8393	TRIOBP	22	37697048	37776556	+	12189	protein_coding	TRIO and F-actin binding protein [Source:HGNC Symbol;Acc:HGNC:17009]	-
ENSG00000181610	26.265	47.6378	30.0322	27.2159	17.3281	32.8302	MRPS23	17	57834781	57850056	-	6379	protein_coding	mitochondrial ribosomal protein S23 [Source:HGNC Symbol;Acc:HGNC:14509]	-
ENSG00000167977	36.2257	44.9933	32.767	24.1196	19.2924	23.8952	KCTD5	16	2682523	2709030	+	3372	protein_coding	potassium channel tetramerization domain containing 5 [Source:HGNC Symbol;Acc:HGNC:21423]	-
ENSG00000198728	26.578	32.7554	26.8231	31.0768	25.2264	38.5985	LDB1	10	102107560	102120453	-	2790	protein_coding	LIM domain binding 1 [Source:HGNC Symbol;Acc:HGNC:6532]	-
ENSG00000141569	25.9701	36.2246	28.2178	31.8065	31.1753	27.6307	TRIM65	17	75880335	75896951	-	3900	protein_coding	tripartite motif containing 65 [Source:HGNC Symbol;Acc:HGNC:27316]	-
ENSG00000107862	29.1472	22.1333	28.9802	31.1582	28.9146	40.5767	GBF1	10	102245532	102382899	+	6641	protein_coding	golgi brefeldin A resistant guanine nucleotide exchange factor 1 [Source:HGNC Symbol;Acc:HGNC:4181]	-
ENSG00000101361	34.5061	34.2198	33.7715	27.027	22.2965	28.9885	NOP56	20	2652593	2658393	+	4950	protein_coding	NOP56 ribonucleoprotein [Source:HGNC Symbol;Acc:HGNC:15911]	-
ENSG00000117122	21.0178	25.4047	24.0165	39.5484	32.3004	38.4427	MFAP2	1	16974502	16980632	-	2712	protein_coding	microfibril associated protein 2 [Source:HGNC Symbol;Acc:HGNC:7033]	-
ENSG00000124172	18.4576	34.9184	25.3918	29.2117	34.7016	37.8249	ATP5F1E	20	59025475	59032345	-	5081	protein_coding	ATP synthase F1 subunit epsilon [Source:HGNC Symbol;Acc:HGNC:838]	-
ENSG00000111676	25.1259	19.6773	25.5055	36.3502	30.0575	43.7427	ATN1	12	6924463	6942321	+	5116	protein_coding	atrophin 1 [Source:HGNC Symbol;Acc:HGNC:3033]	-
ENSG00000129195	23.9466	39.6612	26.8085	32.7519	25.7648	31.5129	PIMREG	17	6444441	6451469	+	2797	protein_coding	PICALM interacting mitotic regulator [Source:HGNC Symbol;Acc:HGNC:25483]	-
ENSG00000183741	29.4716	24.7985	30.3232	34.4415	27.5669	33.6957	CBX6	22	38861422	38872249	-	7993	protein_coding	chromobox 6 [Source:HGNC Symbol;Acc:HGNC:1556]	-
ENSG00000151929	34.0215	23.0992	30.8022	30.9031	21.5178	39.7893	BAG3	10	119651370	119677819	+	2747	protein_coding	BCL2 associated athanogene 3 [Source:HGNC Symbol;Acc:HGNC:939]	-
ENSG00000226243	28.7519	50.5405	32.409	31.0527	13.6685	23.6061	RPL37AP1	20	44466564	44466842	-	279	processed_pseudogene	ribosomal protein L37a pseudogene 1 [Source:HGNC Symbol;Acc:HGNC:16548]	-
ENSG00000224051	25.6532	26.4069	27.9954	30.0974	30.6196	39.1596	CPTP	1	1324756	1328896	+	2555	protein_coding	ceramide-1-phosphate transfer protein [Source:HGNC Symbol;Acc:HGNC:28116]	-
ENSG00000160972	19.4425	22.8307	23.0017	33.5431	39.8182	41.2444	PPP1R16A	8	144477969	144502121	+	5414	protein_coding	protein phosphatase 1 regulatory subunit 16A [Source:HGNC Symbol;Acc:HGNC:14941]	-
ENSG00000059122	21.1402	30.8475	26.7543	35.1239	34.3854	31.5746	FLYWCH1	16	2911937	2951208	+	8419	protein_coding	FLYWCH-type zinc finger 1 [Source:HGNC Symbol;Acc:HGNC:25404]	-
ENSG00000070087	34.0595	48.1719	38.4909	22.236	15.846	20.9496	PFN2	3	149964904	150050788	-	3709	protein_coding	profilin 2 [Source:HGNC Symbol;Acc:HGNC:8882]	-
ENSG00000171224	27.005	53.5474	31.0389	22.9838	18.486	26.6766	FAM241B	10	69630247	69633596	+	1350	protein_coding	family with sequence similarity 241 member B [Source:HGNC Symbol;Acc:HGNC:23519]	-
ENSG00000218283	35.6101	36.7319	40.8238	25.4196	22.502	18.6212	MORF4L1P1	1	220253570	220254536	+	967	processed_pseudogene	mortality factor 4 like 1 pseudogene 1 [Source:HGNC Symbol;Acc:HGNC:20400]	-
ENSG00000084774	23.3125	22.4937	22.586	37.4899	33.7895	40.0324	CAD	2	27217369	27243943	+	8443	protein_coding	carbamoyl-phosphate synthetase 2, aspartate transcarbamylase, and dihydroorotase [Source:HGNC Symbol;Acc:HGNC:1424]	-
ENSG00000160213	24.8938	30.5726	27.2942	32.1551	28.974	35.5755	CSTB	21	43772511	43776445	-	3935	protein_coding	cystatin B [Source:HGNC Symbol;Acc:HGNC:2482]	-
ENSG00000144647	25.8576	30.2052	29.1466	29.3434	26.6443	38.2196	POMGNT2	3	43079232	43106079	-	2671	protein_coding	protein O-linked mannose N-acetylglucosaminyltransferase 2 (beta 1,4-) [Source:HGNC Symbol;Acc:HGNC:25902]	-
ENSG00000185340	22.792	28.0025	24.3294	35.5212	29.1607	39.5904	GAS2L1	22	29306582	29312785	+	4481	protein_coding	growth arrest specific 2 like 1 [Source:HGNC Symbol;Acc:HGNC:16955]	-
ENSG00000106077	27.8935	41.3282	30.0926	30.4555	21.7072	27.6709	ABHD11	7	73736094	73738867	-	2289	protein_coding	abhydrolase domain containing 11 [Source:HGNC Symbol;Acc:HGNC:16407]	-
ENSG00000146731	36.5091	36.1995	36.9095	25.0935	25.1096	19.001	CCT6A	7	56051685	56063989	+	3846	protein_coding	chaperonin containing TCP1 subunit 6A [Source:HGNC Symbol;Acc:HGNC:1620]	-
ENSG00000103495	22.4511	21.6761	17.8131	39.126	35.7373	41.9352	MAZ	16	29806106	29811164	+	3512	protein_coding	MYC associated zinc finger protein [Source:HGNC Symbol;Acc:HGNC:6914]	zf-C2H2
ENSG00000149761	15.2835	33.4821	18.9068	32.4703	39.3517	39.0714	NUDT22	11	64225941	64230686	+	3721	protein_coding	nudix hydrolase 22 [Source:HGNC Symbol;Acc:HGNC:28189]	-
ENSG00000152234	31.3533	37.202	30.0644	24.548	26.6987	28.4615	ATP5F1A	18	46080248	46104334	-	10908	protein_coding	ATP synthase F1 subunit alpha [Source:HGNC Symbol;Acc:HGNC:823]	-
ENSG00000134825	25.6681	49.5455	29.3146	30.3116	19.2881	24.0521	TMEM258	11	61768501	61792802	-	3082	protein_coding	transmembrane protein 258 [Source:HGNC Symbol;Acc:HGNC:1164]	-
ENSG00000115541	22.3594	41.9058	25.8889	31.3514	20.8574	35.5898	HSPE1	2	197500140	197503449	+	1823	protein_coding	heat shock protein family E (Hsp10) member 1 [Source:HGNC Symbol;Acc:HGNC:5269]	-
ENSG00000167118	20.4379	31.4687	21.0371	34.89	34.1573	35.8745	URM1	9	128371319	128392016	+	4410	protein_coding	ubiquitin related modifier 1 [Source:HGNC Symbol;Acc:HGNC:28378]	-
ENSG00000070413	30.0665	33.3736	35.7401	28.9252	22.3824	27.0259	DGCR2	22	19036282	19122454	-	5605	protein_coding	DiGeorge syndrome critical region gene 2 [Source:HGNC Symbol;Acc:HGNC:2845]	-
ENSG00000090266	22.3063	57.4568	26.4165	26.5954	17.4032	27.3201	NDUFB2	7	140690777	140722790	+	4447	protein_coding	NADH:ubiquinone oxidoreductase subunit B2 [Source:HGNC Symbol;Acc:HGNC:7697]	-
ENSG00000141741	18.5696	28.7847	21.1481	36.1025	33.6156	39.074	MIEN1	17	39728496	39730532	-	2037	protein_coding	migration and invasion enhancer 1 [Source:HGNC Symbol;Acc:HGNC:28230]	-
ENSG00000068438	31.3145	41.5154	31.8421	23.7821	21.6357	27.1526	FTSJ1	X	48476021	48486364	+	2872	protein_coding	FtsJ RNA 2'-O-methyltransferase 1 [Source:HGNC Symbol;Acc:HGNC:13254]	-
ENSG00000236081	16.4858	24.635	18.434	39.3185	33.7961	44.561	ELFN1-AS1	7	1738630	1742291	-	989	lncRNA	ELFN1 antisense RNA 1 [Source:HGNC Symbol;Acc:HGNC:39071]	-
ENSG00000125755	22.8064	24.6925	24.4718	35.8249	31.4111	38.0062	SYMPK	19	45815410	45863194	-	10532	protein_coding	symplekin [Source:HGNC Symbol;Acc:HGNC:22935]	-
ENSG00000173402	33.4709	23.7713	29.9128	31.1307	25.1283	33.5397	DAG1	3	49468703	49535618	+	6923	protein_coding	dystroglycan 1 [Source:HGNC Symbol;Acc:HGNC:2666]	-
ENSG00000182934	31.6655	28.1421	29.2068	26.1971	26.648	34.9142	SRPRA	11	126262938	126269144	-	4148	protein_coding	SRP receptor subunit alpha [Source:HGNC Symbol;Acc:HGNC:11307]	-
ENSG00000158246	29.7067	44.5479	42.3426	18.9189	19.3529	21.6784	TENT5B	1	27005020	27012850	-	2382	protein_coding	terminal nucleotidyltransferase 5B [Source:HGNC Symbol;Acc:HGNC:28273]	-
ENSG00000198176	27.7315	23.6224	26.0163	30.6743	31.1861	36.9226	TFDP1	13	113584721	113641473	+	3744	protein_coding	transcription factor Dp-1 [Source:HGNC Symbol;Acc:HGNC:11749]	E2F
ENSG00000105058	33.916	51.7076	35.0919	25.2071	10.5681	19.659	FAM32A	19	16185380	16192046	+	1921	protein_coding	family with sequence similarity 32 member A [Source:HGNC Symbol;Acc:HGNC:24563]	-
ENSG00000144579	18.7086	27.3004	23.0322	35.7896	34.7496	36.5073	CTDSP1	2	218398256	218405941	+	4727	protein_coding	CTD small phosphatase 1 [Source:HGNC Symbol;Acc:HGNC:21614]	-
ENSG00000142327	20.6127	24.7917	24.3507	30.9259	36.8643	38.3379	RNPEPL1	2	240565804	240581372	+	7970	protein_coding	arginyl aminopeptidase like 1 [Source:HGNC Symbol;Acc:HGNC:10079]	-
ENSG00000167543	20.3788	32.3784	22.9226	31.7139	35.5385	32.9474	TP53I13	17	29566052	29573157	+	4570	protein_coding	tumor protein p53 inducible protein 13 [Source:HGNC Symbol;Acc:HGNC:25102]	-
ENSG00000104892	16.3848	33.0946	21.6274	28.7647	39.1524	36.7966	KLC3	19	45333434	45351520	+	3654	protein_coding	kinesin light chain 3 [Source:HGNC Symbol;Acc:HGNC:20717]	-
ENSG00000259803	26.9892	29.6811	31.2	31.8035	27.6166	28.492	SLC22A31	16	89195761	89201651	-	2646	protein_coding	solute carrier family 22 member 31 [Source:HGNC Symbol;Acc:HGNC:27091]	-
ENSG00000171135	26.6517	30.3505	31.9425	27.4833	28.7183	30.1291	JAGN1	3	9890574	9894349	+	1779	protein_coding	jagunal homolog 1 [Source:HGNC Symbol;Acc:HGNC:26926]	-
ENSG00000111737	29.7846	44.956	31.5605	23.2672	18.5913	26.9065	RAB35	12	120095099	120117502	-	4018	protein_coding	RAB35, member RAS oncogene family [Source:HGNC Symbol;Acc:HGNC:9774]	-
ENSG00000163399	33.7516	28.1828	33.7815	29.5056	22.6498	27.1902	ATP1A1	1	116372668	116410261	+	7277	protein_coding	ATPase Na+/K+ transporting subunit alpha 1 [Source:HGNC Symbol;Acc:HGNC:799]	-
ENSG00000115073	23.2251	48.5173	28.7817	29.4254	24.2762	20.6044	ACTR1B	2	97655939	97664044	-	2853	protein_coding	actin related protein 1B [Source:HGNC Symbol;Acc:HGNC:168]	-
ENSG00000198816	19.7563	21.5509	20.1164	39.4	38.9041	35.0157	ZNF358	19	7515292	7521025	+	2083	protein_coding	zinc finger protein 358 [Source:HGNC Symbol;Acc:HGNC:16838]	zf-C2H2
ENSG00000174307	21.88	34.5369	28.0633	28.9931	30.5221	30.6791	PHLDA3	1	201464278	201469237	-	3243	protein_coding	pleckstrin homology like domain family A member 3 [Source:HGNC Symbol;Acc:HGNC:8934]	-
ENSG00000125733	32.4289	35.1967	32.5885	28.1717	19.7817	26.4369	TRIP10	19	6737925	6751530	+	3986	protein_coding	thyroid hormone receptor interactor 10 [Source:HGNC Symbol;Acc:HGNC:12304]	-
ENSG00000162062	18.4799	24.0036	22.5341	31.6702	37.3152	40.2972	TEDC2	16	2460086	2464963	+	2848	protein_coding	tubulin epsilon and delta complex 2 [Source:HGNC Symbol;Acc:HGNC:25849]	-
ENSG00000129925	18.6168	24.6695	25.7993	29.8946	39.1985	36.061	TMEM8A	16	370788	387113	-	4428	protein_coding	transmembrane protein 8A [Source:HGNC Symbol;Acc:HGNC:17205]	-
ENSG00000146670	25.93	35.895	27.909	28.1485	24.0943	32.2037	CDCA5	11	65066300	65084164	-	3901	protein_coding	cell division cycle associated 5 [Source:HGNC Symbol;Acc:HGNC:14626]	-
ENSG00000099814	24.4555	24.3442	25.7311	34.805	28.5344	36.2033	CEP170B	14	104865268	104896770	+	7211	protein_coding	centrosomal protein 170B [Source:HGNC Symbol;Acc:HGNC:20362]	-
ENSG00000132382	23.7089	20.5597	24.3069	32.2323	29.9075	43.3176	MYBBP1A	17	4538897	4555631	-	6203	protein_coding	MYB binding protein 1a [Source:HGNC Symbol;Acc:HGNC:7546]	-
ENSG00000176248	19.2618	24.8704	22.9779	31.9437	35.8393	39.1018	ANAPC2	9	137174784	137188560	-	5458	protein_coding	anaphase promoting complex subunit 2 [Source:HGNC Symbol;Acc:HGNC:19989]	-
ENSG00000175634	17.3839	28.9914	20.8214	33.1241	39.0012	34.665	RPS6KB2	11	67428460	67435401	+	5815	protein_coding	ribosomal protein S6 kinase B2 [Source:HGNC Symbol;Acc:HGNC:10437]	-
ENSG00000104856	39.0744	51.1919	48.0907	13.1159	12.4211	10.0591	RELB	19	45001449	45038198	+	3016	protein_coding	RELB proto-oncogene, NF-kB subunit [Source:HGNC Symbol;Acc:HGNC:9956]	RHD
ENSG00000149257	30.2051	36.8151	28.3823	25.6944	24.1699	28.3785	SERPINH1	11	75562056	75572783	+	6281	protein_coding	serpin family H member 1 [Source:HGNC Symbol;Acc:HGNC:1546]	-
ENSG00000167515	21.7003	34.6344	25.3499	37.6809	21.5377	32.6384	TRAPPC2L	16	88856220	88862686	+	4463	protein_coding	trafficking protein particle complex 2 like [Source:HGNC Symbol;Acc:HGNC:30887]	-
ENSG00000159423	22.2301	29.5847	23.742	29.9375	34.0316	33.412	ALDH4A1	1	18871430	18902724	-	3632	protein_coding	aldehyde dehydrogenase 4 family member A1 [Source:HGNC Symbol;Acc:HGNC:406]	-
ENSG00000267073	16.9452	31.7621	17.656	46.9244	30.7344	28.9133	AC005256.1	19	1748056	1748745	+	458	lncRNA	novel transcript	-
ENSG00000161847	18.9798	17.8527	18.6773	34.6796	35.7729	46.9164	RAVER1	19	10316212	10333638	-	4979	protein_coding	ribonucleoprotein, PTB binding 1 [Source:HGNC Symbol;Acc:HGNC:30296]	-
ENSG00000111319	23.541	20.747	23.4452	36.4491	34.4732	34.1859	SCNN1A	12	6346843	6377730	-	5876	protein_coding	sodium channel epithelial 1 alpha subunit [Source:HGNC Symbol;Acc:HGNC:10599]	-
ENSG00000144655	31.2763	40.0638	38.7367	21.2294	22.1373	19.1974	CSRNP1	3	39141855	39154562	-	3230	protein_coding	cysteine and serine rich nuclear protein 1 [Source:HGNC Symbol;Acc:HGNC:14300]	CSRNP
ENSG00000101189	27.727	46.9901	30.9065	25.8929	19.4205	21.6152	MRGBP	20	62796473	62801729	+	2752	protein_coding	MRG domain binding protein [Source:HGNC Symbol;Acc:HGNC:15866]	-
ENSG00000148344	17.934	27.5618	21.4592	35.729	35.0247	34.7175	PTGES	9	129738331	129753042	-	1891	protein_coding	prostaglandin E synthase [Source:HGNC Symbol;Acc:HGNC:9599]	-
ENSG00000171720	24.3753	46.4426	25.4506	23.8485	22.3959	29.6522	HDAC3	5	141620876	141636849	-	4610	protein_coding	histone deacetylase 3 [Source:HGNC Symbol;Acc:HGNC:4854]	-
ENSG00000157020	29.8693	34.9352	29.9928	27.9752	22.151	27.2055	SEC13	3	10293131	10321112	-	5380	protein_coding	SEC13 homolog, nuclear pore and COPII coat complex component [Source:HGNC Symbol;Acc:HGNC:10697]	-
ENSG00000080819	28.7148	24.2266	24.6829	24.188	34.6399	35.554	CPOX	3	98579446	98593648	-	3157	protein_coding	coproporphyrinogen oxidase [Source:HGNC Symbol;Acc:HGNC:2321]	-
ENSG00000115053	30.1079	18.4276	23.7066	27.1439	39.4928	33.0237	NCL	2	231453531	231483641	-	6819	protein_coding	nucleolin [Source:HGNC Symbol;Acc:HGNC:7667]	-
ENSG00000116688	31.527	34.5282	28.8701	25.3354	21.0318	30.5733	MFN2	1	11980181	12013514	+	4973	protein_coding	mitofusin 2 [Source:HGNC Symbol;Acc:HGNC:16877]	-
ENSG00000140688	21.8718	31.3151	25.9374	29.541	33.5119	29.4397	C16orf58	16	31489471	31509309	-	3608	protein_coding	chromosome 16 open reading frame 58 [Source:HGNC Symbol;Acc:HGNC:25848]	-
ENSG00000104881	28.4712	25.1159	30.1626	32.0442	25.7429	29.9044	PPP1R13L	19	45379638	45406349	-	5028	protein_coding	protein phosphatase 1 regulatory subunit 13 like [Source:HGNC Symbol;Acc:HGNC:18838]	-
ENSG00000166797	22.3645	49.5195	30.251	23.6548	11.9855	33.5444	CIAO2A	15	64072565	64093857	-	2260	protein_coding	cytosolic iron-sulfur assembly component 2A [Source:HGNC Symbol;Acc:HGNC:26235]	-
ENSG00000140939	17.6995	26.0996	19.4348	28.5747	38.4433	41.0508	NOL3	16	67170154	67175735	+	2992	protein_coding	nucleolar protein 3 [Source:HGNC Symbol;Acc:HGNC:7869]	-
ENSG00000170955	24.4619	44.4795	28.2816	16.8225	25.5012	31.68	CAVIN3	11	6318946	6320532	-	1557	protein_coding	caveolae associated protein 3 [Source:HGNC Symbol;Acc:HGNC:9400]	-
ENSG00000175707	19.9345	30.6947	29.8412	33.526	26.3324	30.6322	KDF1	1	26949562	26960468	-	1855	protein_coding	keratinocyte differentiation factor 1 [Source:HGNC Symbol;Acc:HGNC:26624]	-
ENSG00000124422	30.8622	24.2834	25.5458	32.2275	25.8435	32.1428	USP22	17	20999596	21043760	-	6777	protein_coding	ubiquitin specific peptidase 22 [Source:HGNC Symbol;Acc:HGNC:12621]	-
ENSG00000176087	20.1481	19.131	21.0182	27.2471	35.2505	47.9584	SLC35A4	5	140564828	140569100	+	3648	protein_coding	solute carrier family 35 member A4 [Source:HGNC Symbol;Acc:HGNC:20753]	-
ENSG00000142538	20.6858	44.2297	25.26	35.0596	18.0349	27.4704	PTH2	19	49422419	49423441	-	454	protein_coding	parathyroid hormone 2 [Source:HGNC Symbol;Acc:HGNC:30828]	-
ENSG00000102981	15.4717	34.4867	20.6509	34.0316	37.5004	28.3462	PARD6A	16	67660946	67662778	+	1488	protein_coding	par-6 family cell polarity regulator alpha [Source:HGNC Symbol;Acc:HGNC:15943]	-
ENSG00000141580	34.0083	30.7144	35.4906	22.2604	22.3881	25.5969	WDR45B	17	82614562	82648553	-	3542	protein_coding	WD repeat domain 45B [Source:HGNC Symbol;Acc:HGNC:25072]	-
ENSG00000184916	28.2855	25.3951	30.4581	29.9786	25.6381	30.6397	JAG2	14	105140982	105168824	-	6396	protein_coding	jagged canonical Notch ligand 2 [Source:HGNC Symbol;Acc:HGNC:6189]	-
ENSG00000176108	18.814	32.4453	24.2961	30.0605	29.5233	35.1648	CHMP6	17	80991598	81009517	+	2118	protein_coding	charged multivesicular body protein 6 [Source:HGNC Symbol;Acc:HGNC:25675]	-
ENSG00000063245	18.7553	21.2576	21.5165	34.3313	35.0602	38.97	EPN1	19	55675226	55709858	+	17616	protein_coding	epsin 1 [Source:HGNC Symbol;Acc:HGNC:21604]	-
ENSG00000169093	20.8712	34.7462	24.092	33.3312	26.457	30.3561	ASMTL	X	1403139	1453762	-	3506	protein_coding	acetylserotonin O-methyltransferase like [Source:HGNC Symbol;Acc:HGNC:751]	-
ENSG00000039650	19.2138	26.6068	24.0677	35.0653	33.5499	31.3404	PNKP	19	49859882	49878351	-	4545	protein_coding	polynucleotide kinase 3'-phosphatase [Source:HGNC Symbol;Acc:HGNC:9154]	-
ENSG00000198805	37.3281	59.4899	41.1169	12.1859	8.3058	11.3418	PNP	14	20468954	20477094	+	4139	protein_coding	purine nucleoside phosphorylase [Source:HGNC Symbol;Acc:HGNC:7892]	-
ENSG00000175792	27.9491	40.6821	26.924	26.5648	19.049	28.4345	RUVBL1	3	128064778	128153914	-	6998	protein_coding	RuvB like AAA ATPase 1 [Source:HGNC Symbol;Acc:HGNC:10474]	-
ENSG00000141480	18.3955	26.3029	19.3565	35.0526	34.0563	36.4371	ARRB2	17	4710596	4721499	+	4265	protein_coding	arrestin beta 2 [Source:HGNC Symbol;Acc:HGNC:712]	-
ENSG00000119335	34.054	27.2553	28.6119	22.8701	31.1504	25.5645	SET	9	128683424	128696400	+	4355	protein_coding	SET nuclear proto-oncogene [Source:HGNC Symbol;Acc:HGNC:10760]	-
ENSG00000172731	22.255	36.166	25.4305	27.1421	26.2073	32.2782	LRRC20	10	70298970	70382650	-	3625	protein_coding	leucine rich repeat containing 20 [Source:HGNC Symbol;Acc:HGNC:23421]	-
ENSG00000186193	30.4714	24.5461	31.7259	28.7378	22.0413	31.5605	SAPCD2	9	137062127	137070557	-	3814	protein_coding	suppressor APC domain containing 2 [Source:HGNC Symbol;Acc:HGNC:28055]	-
ENSG00000160685	25.7052	32.106	25.2162	28.9057	28.034	29.016	ZBTB7B	1	155002630	155018522	+	4303	protein_coding	zinc finger and BTB domain containing 7B [Source:HGNC Symbol;Acc:HGNC:18668]	ZBTB
ENSG00000226950	17.7612	31.2053	19.9572	35.2535	26.3783	38.4033	DANCR	4	52712404	52720351	+	2328	lncRNA	differentiation antagonizing non-protein coding RNA [Source:HGNC Symbol;Acc:HGNC:28964]	-
ENSG00000141582	31.3343	29.3575	31.6328	32.3374	18.9911	25.1565	CBX4	17	79833156	79839440	-	2891	protein_coding	chromobox 4 [Source:HGNC Symbol;Acc:HGNC:1554]	-
ENSG00000165688	21.8493	28.8313	23.0384	27.1877	27.1416	40.6375	PMPCA	9	136410641	136423761	+	6519	protein_coding	peptidase, mitochondrial processing alpha subunit [Source:HGNC Symbol;Acc:HGNC:18667]	-
ENSG00000105427	14.2564	33.1941	21.8261	36.5932	28.5437	34.1752	CNFN	19	42387019	42390297	-	613	protein_coding	cornifelin [Source:HGNC Symbol;Acc:HGNC:30183]	-
ENSG00000044115	38.104	23.3575	33.0268	24.4151	23.7979	25.8439	CTNNA1	5	138610967	138935034	+	8830	protein_coding	catenin alpha 1 [Source:HGNC Symbol;Acc:HGNC:2509]	-
ENSG00000184887	23.3933	35.8176	27.6289	28.5825	24.0548	29.0277	BTBD6	14	105248490	105251093	+	2392	protein_coding	BTB domain containing 6 [Source:HGNC Symbol;Acc:HGNC:19897]	-
ENSG00000170265	23.7739	29.6853	26.2505	31.6785	28.7488	28.2793	ZNF282	7	149195546	149226238	+	3761	protein_coding	zinc finger protein 282 [Source:HGNC Symbol;Acc:HGNC:13076]	zf-C2H2
ENSG00000183048	12.1428	14.3011	14.6409	34.8743	46.5381	45.8724	SLC25A10	17	81712236	81721016	+	2621	protein_coding	solute carrier family 25 member 10 [Source:HGNC Symbol;Acc:HGNC:10980]	-
ENSG00000196411	24.9341	22.5714	25.5589	34.3889	26.2589	34.6461	EPHB4	7	100802565	100827523	-	6437	protein_coding	EPH receptor B4 [Source:HGNC Symbol;Acc:HGNC:3395]	-
ENSG00000100726	18.6622	19.8324	19.0416	30.5621	35.6807	44.2472	TELO2	16	1493344	1510457	+	4239	protein_coding	telomere maintenance 2 [Source:HGNC Symbol;Acc:HGNC:29099]	-
ENSG00000167113	16.5962	29.9342	19.059	35.2013	34.3301	32.6853	COQ4	9	128322544	128334072	+	4806	protein_coding	coenzyme Q4 [Source:HGNC Symbol;Acc:HGNC:19693]	-
ENSG00000100991	31.8251	32.9661	33.6877	19.3495	21.5669	28.3628	TRPC4AP	20	35002404	35092807	-	3162	protein_coding	transient receptor potential cation channel subfamily C member 4 associated protein [Source:HGNC Symbol;Acc:HGNC:16181]	-
ENSG00000090661	20.3575	42.4571	26.225	24.8357	28.006	25.8407	CERS4	19	8206736	8262421	+	4059	protein_coding	ceramide synthase 4 [Source:HGNC Symbol;Acc:HGNC:23747]	-
ENSG00000139289	35.6196	29.8186	32.7252	25.7356	24.4647	19.3289	PHLDA1	12	76025447	76033932	-	8069	protein_coding	pleckstrin homology like domain family A member 1 [Source:HGNC Symbol;Acc:HGNC:8933]	-
ENSG00000157637	28.8766	29.1089	30.2811	28.5137	22.9587	27.7265	SLC38A10	17	81244811	81295547	-	7907	protein_coding	solute carrier family 38 member 10 [Source:HGNC Symbol;Acc:HGNC:28237]	-
ENSG00000118046	24.678	26.9318	26.1085	32.6144	28.247	28.6886	STK11	19	1177558	1228435	+	8692	protein_coding	serine/threonine kinase 11 [Source:HGNC Symbol;Acc:HGNC:11389]	-
ENSG00000125731	27.2256	35.7876	34.4622	28.0606	20.5527	20.8779	SH2D3A	19	6752160	6767463	-	5591	protein_coding	SH2 domain containing 3A [Source:HGNC Symbol;Acc:HGNC:16885]	-
ENSG00000160570	26.3003	37.9913	27.8853	25.8074	23.916	24.8996	DEDD2	19	42198598	42220140	-	2631	protein_coding	death effector domain containing 2 [Source:HGNC Symbol;Acc:HGNC:24450]	-
ENSG00000171960	24.4003	47.4002	26.5888	21.7831	19.004	27.3767	PPIH	1	42658423	42676758	+	1446	protein_coding	peptidylprolyl isomerase H [Source:HGNC Symbol;Acc:HGNC:14651]	-
ENSG00000103202	20.8733	23.9855	21.3619	33.4978	31.1085	35.7111	NME4	16	396725	410367	+	3665	protein_coding	NME/NM23 nucleoside diphosphate kinase 4 [Source:HGNC Symbol;Acc:HGNC:7852]	-
ENSG00000100567	21.7672	29.3273	25.6243	30.3271	26.5875	32.8789	PSMA3	14	58244843	58272012	+	3107	protein_coding	proteasome subunit alpha 3 [Source:HGNC Symbol;Acc:HGNC:9532]	-
ENSG00000183255	37.7256	35.4762	35.3537	20.1842	17.9643	19.5318	PTTG1IP	21	44849585	44873903	-	3537	protein_coding	PTTG1 interacting protein [Source:HGNC Symbol;Acc:HGNC:13524]	-
ENSG00000011485	25.41	32.1657	24.8466	30.9323	23.646	29.216	PPP5C	19	46347087	46392981	+	7089	protein_coding	protein phosphatase 5 catalytic subunit [Source:HGNC Symbol;Acc:HGNC:9322]	-
ENSG00000182379	19.5259	21.409	16.473	35.3131	37.1267	36.2214	NXPH4	12	57216794	57226449	+	2151	protein_coding	neurexophilin 4 [Source:HGNC Symbol;Acc:HGNC:8078]	-
ENSG00000127666	25.9068	26.5136	28.68	27.6573	26.4268	30.6861	TICAM1	19	4815932	4831704	-	2676	protein_coding	toll like receptor adaptor molecule 1 [Source:HGNC Symbol;Acc:HGNC:18348]	-
ENSG00000213672	19.3505	26.5058	22.9903	29.3228	30.0265	37.5136	NCKIPSD	3	48673844	48686364	-	3431	protein_coding	NCK interacting protein with SH3 domain [Source:HGNC Symbol;Acc:HGNC:15486]	-
ENSG00000055070	29.9408	30.9028	25.2692	32.4897	20.9092	26.1229	SZRD1	1	16352575	16398145	+	4742	protein_coding	SUZ RNA binding domain containing 1 [Source:HGNC Symbol;Acc:HGNC:30232]	-
ENSG00000149480	27.9636	28.6105	26.5862	29.3483	21.7428	31.2587	MTA2	11	62593214	62601865	-	4261	protein_coding	metastasis associated 1 family member 2 [Source:HGNC Symbol;Acc:HGNC:7411]	zf-GATA
ENSG00000144567	22.3292	27.4892	26.8663	28.1778	29.4487	31.1372	RETREG2	2	219176225	219185475	+	5675	protein_coding	reticulophagy regulator family member 2 [Source:HGNC Symbol;Acc:HGNC:28450]	-
ENSG00000051108	43.135	35.0142	39.8499	16.9162	15.455	14.9902	HERPUD1	16	56932142	56944864	+	5062	protein_coding	homocysteine inducible ER protein with ubiquitin like domain 1 [Source:HGNC Symbol;Acc:HGNC:13744]	-
ENSG00000178252	23.7189	26.7198	24.9618	27.7936	27.5119	34.5833	WDR6	3	49007062	49015953	+	5304	protein_coding	WD repeat domain 6 [Source:HGNC Symbol;Acc:HGNC:12758]	-
ENSG00000213523	22.1618	31.956	22.318	33.7583	23.8956	31.1125	SRA1	5	140537340	140558252	-	3396	protein_coding	steroid receptor RNA activator 1 [Source:HGNC Symbol;Acc:HGNC:11281]	-
ENSG00000109089	21.9852	24.2548	25.4261	28.3001	28.6908	36.4988	CDR2L	17	74987632	75005800	+	3536	protein_coding	cerebellar degeneration related protein 2 like [Source:HGNC Symbol;Acc:HGNC:29999]	-
novel.335	19.5653	37.8839	22.9541	26.7272	40.9735	17.0158	-	CHR_HG2046_PATCH	7402954	7404120	-	490	-	- && Q8N2U0.1 RecName: Full=Transmembrane protein 256; Flags: Precursor && -	-
ENSG00000087087	25.6548	20.8325	21.9571	30.2485	26.0319	40.239	SRRT	7	100875103	100888664	+	4858	protein_coding	serrate, RNA effector molecule [Source:HGNC Symbol;Acc:HGNC:24101]	-
ENSG00000106397	25.2775	26.4385	28.9075	28.4346	26.9478	28.9477	PLOD3	7	101205977	101218420	-	5671	protein_coding	procollagen-lysine,2-oxoglutarate 5-dioxygenase 3 [Source:HGNC Symbol;Acc:HGNC:9083]	-
ENSG00000218891	19.6243	21.5856	22.6961	32.4879	27.1284	41.427	ZNF579	19	55576774	55580848	-	3320	protein_coding	zinc finger protein 579 [Source:HGNC Symbol;Acc:HGNC:26646]	zf-C2H2
ENSG00000065000	28.7585	21.5731	26.604	30.8238	23.2711	33.613	AP3D1	19	2100988	2164468	-	8613	protein_coding	adaptor related protein complex 3 subunit delta 1 [Source:HGNC Symbol;Acc:HGNC:568]	-
ENSG00000163930	20.9974	31.0411	24.1356	27.0322	29.3243	32.0921	BAP1	3	52401008	52410008	-	4718	protein_coding	BRCA1 associated protein 1 [Source:HGNC Symbol;Acc:HGNC:950]	-
ENSG00000143799	31.6419	22.3021	27.4792	27.1896	26.764	28.8824	PARP1	1	226360691	226408093	-	7183	protein_coding	poly(ADP-ribose) polymerase 1 [Source:HGNC Symbol;Acc:HGNC:270]	-
ENSG00000099203	15.5083	37.8489	20.7585	27.0567	31.6423	31.1276	TMED1	19	10832067	10836318	-	1884	protein_coding	transmembrane p24 trafficking protein 1 [Source:HGNC Symbol;Acc:HGNC:17291]	-
ENSG00000106366	46.2658	46.0216	47.242	10.4425	6.87389	6.87471	SERPINE1	7	101127089	101139266	+	3190	protein_coding	serpin family E member 1 [Source:HGNC Symbol;Acc:HGNC:8583]	-
ENSG00000134153	29.4648	50.8307	32.2	19.7504	16.0673	15.2	EMC7	15	34084017	34101862	-	1452	protein_coding	ER membrane protein complex subunit 7 [Source:HGNC Symbol;Acc:HGNC:24301]	-
ENSG00000136485	27.3792	28.7617	26.4656	26.9276	25.9072	28.0388	DCAF7	17	63550477	63594279	+	6572	protein_coding	DDB1 and CUL4 associated factor 7 [Source:HGNC Symbol;Acc:HGNC:30915]	-
ENSG00000105248	24.3198	28.732	26.8843	30.2383	19.467	33.7723	YJU2	19	4247080	4269088	+	1668	protein_coding	YJU2 splicing factor homolog [Source:HGNC Symbol;Acc:HGNC:25518]	-
ENSG00000123179	23.9132	46.2247	33.6464	21.1383	15.0268	23.2202	EBPL	13	49660674	49691486	-	1560	protein_coding	EBP like [Source:HGNC Symbol;Acc:HGNC:18061]	-
ENSG00000139641	26.4172	26.954	26.9535	26.4094	25.3197	31.0464	ESYT1	12	56118250	56144671	+	5493	protein_coding	extended synaptotagmin 1 [Source:HGNC Symbol;Acc:HGNC:29534]	-
ENSG00000172428	22.9559	52.7062	29.5568	23.0792	12.7745	21.5664	COPS9	2	240126563	240136807	-	2037	protein_coding	COP9 signalosome subunit 9 [Source:HGNC Symbol;Acc:HGNC:21314]	-
ENSG00000140474	19.5802	27.3019	21.2548	30.0636	33.0996	31.284	ULK3	15	74836118	74843346	-	3514	protein_coding	unc-51 like kinase 3 [Source:HGNC Symbol;Acc:HGNC:19703]	-
ENSG00000160917	21.7648	41.3905	23.4613	25.1299	25.1521	25.4422	CPSF4	7	99438922	99457373	+	4252	protein_coding	cleavage and polyadenylation specific factor 4 [Source:HGNC Symbol;Acc:HGNC:2327]	-
ENSG00000182809	15.6539	27.1039	19.6663	31.9349	39.0492	28.869	CRIP2	14	105472962	105480170	+	4837	protein_coding	cysteine rich protein 2 [Source:HGNC Symbol;Acc:HGNC:2361]	-
ENSG00000119777	24.2989	27.5427	25.4129	21.5614	27.6007	35.8103	TMEM214	2	27032910	27041694	+	4909	protein_coding	transmembrane protein 214 [Source:HGNC Symbol;Acc:HGNC:25983]	-
ENSG00000186501	17.4264	22.0323	22.0737	32.3649	34.7813	33.4358	TMEM222	1	27322145	27336400	+	4476	protein_coding	transmembrane protein 222 [Source:HGNC Symbol;Acc:HGNC:25363]	-
ENSG00000185721	27.09	42.7551	32.81	20.472	17.6816	21.0067	DRG1	22	31399604	31530634	+	2198	protein_coding	developmentally regulated GTP binding protein 1 [Source:HGNC Symbol;Acc:HGNC:3029]	-
ENSG00000158941	21.899	26.7027	23.0755	28.7904	26.6673	34.2175	CCAR2	8	22604632	22621514	+	6534	protein_coding	cell cycle and apoptosis regulator 2 [Source:HGNC Symbol;Acc:HGNC:23360]	-
ENSG00000137106	21.2007	41.1893	24.1924	30.2529	20.0933	24.2115	GRHPR	9	37422666	37436990	+	7226	protein_coding	glyoxylate and hydroxypyruvate reductase [Source:HGNC Symbol;Acc:HGNC:4570]	-
ENSG00000105464	21.9868	17.8912	19.2407	33.4286	30.3805	38.1897	GRIN2D	19	48394875	48444931	+	5093	protein_coding	glutamate ionotropic receptor NMDA type subunit 2D [Source:HGNC Symbol;Acc:HGNC:4588]	-
ENSG00000232112	20.4987	43.9568	28.2048	29.7771	18.4147	20.0537	TMA7	3	48440257	48444208	+	1139	protein_coding	translation machinery associated 7 homolog [Source:HGNC Symbol;Acc:HGNC:26932]	-
ENSG00000106266	19.2591	29.583	22.1562	26.4671	27.6016	35.6783	SNX8	7	2251770	2354318	-	5750	protein_coding	sorting nexin 8 [Source:HGNC Symbol;Acc:HGNC:14972]	-
ENSG00000161618	16.7841	23.7068	19.2554	31.6558	34.2915	34.4447	ALDH16A1	19	49453225	49471050	+	4589	protein_coding	aldehyde dehydrogenase 16 family member A1 [Source:HGNC Symbol;Acc:HGNC:28114]	-
ENSG00000138111	16.3322	22.805	18.493	32.2089	29.9332	40.3579	MFSD13A	10	102461395	102477045	+	3526	protein_coding	major facilitator superfamily domain containing 13A [Source:HGNC Symbol;Acc:HGNC:26196]	-
ENSG00000264364	29.9885	35.0584	30.941	21.9231	18.2653	23.777	DYNLL2	17	58083419	58095542	+	6807	protein_coding	dynein light chain LC8-type 2 [Source:HGNC Symbol;Acc:HGNC:24596]	-
ENSG00000112559	22.3648	32.2227	28.1071	25.7312	24.1168	27.1478	MDFI	6	41636882	41654246	+	2537	protein_coding	MyoD family inhibitor [Source:HGNC Symbol;Acc:HGNC:6967]	-
ENSG00000086065	23.4577	40.349	30.961	25.8699	18.2715	20.7177	CHMP5	9	33264879	33282070	+	2391	protein_coding	charged multivesicular body protein 5 [Source:HGNC Symbol;Acc:HGNC:26942]	-
ENSG00000145214	17.3417	22.9786	24.4749	29.6919	31.1637	33.9709	DGKQ	4	958887	986895	-	4983	protein_coding	diacylglycerol kinase theta [Source:HGNC Symbol;Acc:HGNC:2856]	-
ENSG00000163950	31.0165	22.7851	27.7821	24.9535	24.2006	28.7475	SLBP	4	1692731	1712344	-	1884	protein_coding	stem-loop binding protein [Source:HGNC Symbol;Acc:HGNC:10904]	-
ENSG00000131187	16.958	24.3016	18.584	31.3852	32.6279	35.2476	F12	5	177402140	177409576	-	2769	protein_coding	coagulation factor XII [Source:HGNC Symbol;Acc:HGNC:3530]	-
ENSG00000162337	26.9859	25.74	28.7655	27.3118	23.1146	27.1556	LRP5	11	68312591	68449275	+	6182	protein_coding	LDL receptor related protein 5 [Source:HGNC Symbol;Acc:HGNC:6697]	-
ENSG00000233016	21.2148	37.9171	27.8511	31.4588	20.7538	19.8262	SNHG7	9	136721366	136728184	-	4891	lncRNA	small nucleolar RNA host gene 7 [Source:HGNC Symbol;Acc:HGNC:28254]	-
ENSG00000272763	24.7223	30.3077	26.7153	27.6048	24.6321	24.9793	AC103702.2	17	48635923	48647023	-	1596	lncRNA	novel transcript	-
ENSG00000197905	18.5763	24.165	22.0701	31.8238	30.2715	31.8141	TEAD4	12	2959330	3040676	+	2275	protein_coding	TEA domain transcription factor 4 [Source:HGNC Symbol;Acc:HGNC:11717]	TEA
ENSG00000161036	19.6018	22.5119	21.5841	30.1135	30.6692	34.2189	LRWD1	7	102464956	102473168	+	5899	protein_coding	leucine rich repeats and WD repeat domain containing 1 [Source:HGNC Symbol;Acc:HGNC:21769]	-
ENSG00000124191	18.6077	17.187	20.7473	41.4797	30.8229	29.672	TOX2	20	43914852	44069616	+	3235	protein_coding	TOX high mobility group box family member 2 [Source:HGNC Symbol;Acc:HGNC:16095]	HMG
ENSG00000145901	29.3497	33.5846	35.697	20.2768	17.6288	21.7464	TNIP1	5	151029945	151093577	-	5793	protein_coding	TNFAIP3 interacting protein 1 [Source:HGNC Symbol;Acc:HGNC:16903]	-
ENSG00000116459	26.2492	21.1311	29.0023	31.7611	26.2891	23.7792	ATP5PB	1	111448864	111462773	+	3138	protein_coding	ATP synthase peripheral stalk-membrane subunit b [Source:HGNC Symbol;Acc:HGNC:840]	-
ENSG00000134291	28.0577	43.4543	34.6094	22.0905	12.9107	17.0777	TMEM106C	12	47963569	47968878	+	3475	protein_coding	transmembrane protein 106C [Source:HGNC Symbol;Acc:HGNC:28775]	-
ENSG00000101294	25.7672	34.228	28.2895	22.3392	22.8736	24.6994	HM13	20	31514410	31577923	+	10805	protein_coding	histocompatibility minor 13 [Source:HGNC Symbol;Acc:HGNC:16435]	-
ENSG00000167565	24.8096	35.0608	27.5674	24.422	20.0593	26.2744	SERTAD3	19	40440844	40444335	-	1848	protein_coding	SERTA domain containing 3 [Source:HGNC Symbol;Acc:HGNC:17931]	-
ENSG00000169592	18.9137	36.8187	20.2145	27.4818	25.1795	29.488	INO80E	16	29995715	30005793	+	5655	protein_coding	INO80 complex subunit E [Source:HGNC Symbol;Acc:HGNC:26905]	-
ENSG00000071626	27.8988	33.2598	28.1956	24.4233	19.419	24.7866	DAZAP1	19	1407569	1435687	+	9201	protein_coding	DAZ associated protein 1 [Source:HGNC Symbol;Acc:HGNC:2683]	-
ENSG00000142156	21.1167	20.7956	23.6926	33.9008	27.416	31.0001	COL6A1	21	45981737	46005050	+	5343	protein_coding	collagen type VI alpha 1 chain [Source:HGNC Symbol;Acc:HGNC:2211]	-
ENSG00000103051	22.6127	39.4219	25.5504	25.7315	19.6207	24.6305	COG4	16	70480568	70523558	-	4779	protein_coding	component of oligomeric golgi complex 4 [Source:HGNC Symbol;Acc:HGNC:18620]	-
ENSG00000131899	17.784	20.0701	20.7823	33.621	31.2914	33.7673	LLGL1	17	18225635	18244875	+	6590	protein_coding	LLGL scribble cell polarity complex component 1 [Source:HGNC Symbol;Acc:HGNC:6628]	-
ENSG00000105696	15.7953	22.0225	21.0798	31.5087	34.1911	32.6045	TMEM59L	19	18607430	18621039	+	2626	protein_coding	transmembrane protein 59 like [Source:HGNC Symbol;Acc:HGNC:13237]	-
novel.552	23.5131	28.2809	25.3181	24.6595	35.0108	20.3414	-	CHR_HSCHR16_4_CTG3_1	71293885	71294938	+	1054	-	- && Q92572.1 RecName: Full=AP-3 complex subunit sigma-1; AltName: Full=AP-3 complex subunit sigma-3A; AltName: Full=Adaptor-related protein complex 3 subunit sigma-1; AltName: Full=Clathrin-associated/assembly/adaptor protein, small 3; AltName: Full=Sigma-3A-adaptin; Short=Sigma3A-adaptin; AltName: Full=Sigma-adaptin 3a >Q9DCR2.2 RecName: Full=AP-3 complex subunit sigma-1; AltName: Full=AP-3 com…	-
ENSG00000198576	21.9208	28.0887	28.7618	27.3983	26.2324	24.6737	ARC	8	142611049	142614479	-	2993	protein_coding	activity regulated cytoskeleton associated protein [Source:HGNC Symbol;Acc:HGNC:648]	-
ENSG00000184232	19.5004	26.1334	25.211	29.4418	28.493	28.2617	OAF	11	120211032	120230334	+	2913	protein_coding	out at first homolog [Source:HGNC Symbol;Acc:HGNC:28752]	-
ENSG00000183978	21.2777	42.3813	27.182	23.6505	18.2677	24.2379	COA3	17	42795147	42798704	-	1931	protein_coding	cytochrome c oxidase assembly factor 3 [Source:HGNC Symbol;Acc:HGNC:24990]	-
ENSG00000149091	17.1826	18.6897	19.0819	29.8913	34.9057	37.0947	DGKZ	11	46332905	46380554	+	10787	protein_coding	diacylglycerol kinase zeta [Source:HGNC Symbol;Acc:HGNC:2857]	-
ENSG00000133895	19.3891	18.6979	20.8992	32.0313	28.5135	37.0899	MEN1	11	64803510	64811294	-	4921	protein_coding	menin 1 [Source:HGNC Symbol;Acc:HGNC:7010]	-
ENSG00000100219	34.5258	37.4608	33.9889	19.6735	15.7612	15.1329	XBP1	22	28794555	28800597	-	3028	protein_coding	X-box binding protein 1 [Source:HGNC Symbol;Acc:HGNC:12801]	TF_bZIP
ENSG00000224858	35.6577	42.6275	26.8951	21.1583	9.6888	20.5068	RPL29P11	3	37016523	37017014	-	492	processed_pseudogene	ribosomal protein L29 pseudogene 11 [Source:HGNC Symbol;Acc:HGNC:36905]	-
ENSG00000143870	40.5683	35.9942	34.8296	15.001	15.945	14.1292	PDIA6	2	10783391	10837977	-	4101	protein_coding	protein disulfide isomerase family A member 6 [Source:HGNC Symbol;Acc:HGNC:30168]	-
ENSG00000137267	31.1538	31.9099	25.4857	22.0923	17.3248	28.2985	TUBB2A	6	3153666	3157544	-	1748	protein_coding	tubulin beta 2A class IIa [Source:HGNC Symbol;Acc:HGNC:12412]	-
ENSG00000177239	20.6403	31.2128	24.3859	28.1182	26.4162	25.3942	MAN1B1	9	137086985	137109183	+	8269	protein_coding	mannosidase alpha class 1B member 1 [Source:HGNC Symbol;Acc:HGNC:6823]	-
ENSG00000160949	16.1507	15.7847	16.8603	34.1331	34.9491	38.2809	TONSL	8	144428775	144444440	-	7107	protein_coding	tonsoku like, DNA repair protein [Source:HGNC Symbol;Acc:HGNC:7801]	-
ENSG00000179094	21.3201	20.3549	22.6566	31.6524	28.9216	31.13	PER1	17	8140472	8156506	-	7002	protein_coding	period circadian regulator 1 [Source:HGNC Symbol;Acc:HGNC:8845]	-
ENSG00000172586	25.6825	47.9026	28.9492	24.6814	10.475	18.3312	CHCHD1	10	73782047	73783652	+	1483	protein_coding	coiled-coil-helix-coiled-coil-helix domain containing 1 [Source:HGNC Symbol;Acc:HGNC:23518]	-
ENSG00000084754	28.5356	27.8802	25.8849	25.3073	19.2936	29.1034	HADHA	2	26190635	26244672	-	4331	protein_coding	hydroxyacyl-CoA dehydrogenase trifunctional multienzyme complex subunit alpha [Source:HGNC Symbol;Acc:HGNC:4801]	-
ENSG00000161671	18.7134	24.6447	20.8474	33.6428	28.3119	29.5827	EMC10	19	50476400	50490870	+	10748	protein_coding	ER membrane protein complex subunit 10 [Source:HGNC Symbol;Acc:HGNC:27609]	-
ENSG00000149925	16.9645	17.5508	16.396	32.8173	31.1822	40.7691	ALDOA	16	30064164	30070457	+	3829	protein_coding	aldolase, fructose-bisphosphate A [Source:HGNC Symbol;Acc:HGNC:414]	-
ENSG00000106399	16.708	40.0114	21.9266	24.6657	24.3446	27.7702	RPA3	7	7636518	7718607	-	3232	protein_coding	replication protein A3 [Source:HGNC Symbol;Acc:HGNC:10291]	-
ENSG00000149182	20.7401	32.1815	23.5769	24.5242	25.8325	28.5209	ARFGAP2	11	47164299	47177125	-	5918	protein_coding	ADP ribosylation factor GTPase activating protein 2 [Source:HGNC Symbol;Acc:HGNC:13504]	-
ENSG00000099284	27.8492	39.172	27.6626	22.3521	14.3686	23.8627	H2AFY2	10	70052846	70112282	+	1932	protein_coding	H2A histone family member Y2 [Source:HGNC Symbol;Acc:HGNC:14453]	-
ENSG00000142945	29.6217	39.6049	28.127	19.3598	18.7347	19.7358	KIF2C	1	44739818	44767767	+	3646	protein_coding	kinesin family member 2C [Source:HGNC Symbol;Acc:HGNC:6393]	-
ENSG00000161249	20.9478	38.8322	23.2173	26.534	18.7138	26.552	DMKN	19	35497220	35513658	-	7444	protein_coding	dermokine [Source:HGNC Symbol;Acc:HGNC:25063]	-
ENSG00000135506	35.8452	34.8764	33.9193	18.8528	15.07	16.1438	OS9	12	57693955	57721557	+	5169	protein_coding	OS9 endoplasmic reticulum lectin [Source:HGNC Symbol;Acc:HGNC:16994]	-
ENSG00000111786	32.4765	32.3651	29.2262	25.2465	15.6481	19.6447	SRSF9	12	120461672	120469748	-	3695	protein_coding	serine and arginine rich splicing factor 9 [Source:HGNC Symbol;Acc:HGNC:10791]	-
ENSG00000185085	16.5774	21.2451	20.1854	29.8082	30.0806	36.6855	INTS5	11	62646848	62653302	-	3285	protein_coding	integrator complex subunit 5 [Source:HGNC Symbol;Acc:HGNC:29352]	-
ENSG00000038358	20.9462	21.7009	22.6287	25.8032	24.8529	38.4444	EDC4	16	67873052	67884499	+	6140	protein_coding	enhancer of mRNA decapping 4 [Source:HGNC Symbol;Acc:HGNC:17157]	-
ENSG00000137100	22.1113	43.2865	25.8476	23.6678	17.634	21.6939	DCTN3	9	34613545	34620523	-	3740	protein_coding	dynactin subunit 3 [Source:HGNC Symbol;Acc:HGNC:2713]	-
ENSG00000114993	20.6797	22.3501	24.4005	26.0051	29.526	31.26	RTKN	2	74425835	74442422	-	5191	protein_coding	rhotekin [Source:HGNC Symbol;Acc:HGNC:10466]	-
ENSG00000140264	23.6389	25.3877	20.2019	38.1006	23.3347	23.5457	SERF2	15	43777087	43802589	+	7347	protein_coding	small EDRK-rich factor 2 [Source:HGNC Symbol;Acc:HGNC:10757]	-
ENSG00000065427	27.7236	28.4093	27.1086	23.5268	19.549	27.2159	KARS	16	75627474	75648643	-	4065	protein_coding	lysyl-tRNA synthetase [Source:HGNC Symbol;Acc:HGNC:6215]	-
ENSG00000182307	24.6908	31.0812	26.0919	25.3337	19.544	26.6063	C8orf33	8	145052465	145066685	+	4353	protein_coding	chromosome 8 open reading frame 33 [Source:HGNC Symbol;Acc:HGNC:26104]	-
ENSG00000185608	21.7725	25.4793	21.3244	29.8719	23.8023	30.7002	MRPL40	22	19431902	19436075	+	1965	protein_coding	mitochondrial ribosomal protein L40 [Source:HGNC Symbol;Acc:HGNC:14491]	-
ENSG00000105088	15.6001	20.5979	18.2901	32.8281	36.3854	29.0629	OLFM2	19	9853718	9936552	-	2500	protein_coding	olfactomedin 2 [Source:HGNC Symbol;Acc:HGNC:17189]	-
ENSG00000162522	25.7946	22.2818	24.5939	27.3774	21.5847	31.0986	KIAA1522	1	32741830	32774970	+	6020	protein_coding	KIAA1522 [Source:HGNC Symbol;Acc:HGNC:29301]	-
ENSG00000108840	17.5501	25.4335	21.5579	28.4758	30.7128	28.8151	HDAC5	17	44076746	44123702	-	7618	protein_coding	histone deacetylase 5 [Source:HGNC Symbol;Acc:HGNC:14068]	-
ENSG00000124587	18.0878	24.7518	21.8948	28.3761	28.1619	31.1198	PEX6	6	42963865	42979181	-	3465	protein_coding	peroxisomal biogenesis factor 6 [Source:HGNC Symbol;Acc:HGNC:8859]	-
ENSG00000137825	20.9395	32.108	26.1318	25.7668	24.3027	22.9644	ITPKA	15	41493393	41503551	+	2093	protein_coding	inositol-trisphosphate 3-kinase A [Source:HGNC Symbol;Acc:HGNC:6178]	-
ENSG00000234742	18.919	49.3665	25.829	21.7818	17.3801	18.684	AC144530.1	3	197850400	197850954	-	555	processed_pseudogene	ribosomal protein L17 (RPL17) pseudogene	-
ENSG00000076248	21.138	22.8416	21.2779	30.166	24.403	32.0437	UNG	12	109097574	109110992	+	2567	protein_coding	uracil DNA glycosylase [Source:HGNC Symbol;Acc:HGNC:12572]	-
ENSG00000217716	18.8788	47.5134	25.0004	25.2872	16.234	18.8636	RPS10P3	9	88016300	88016793	+	494	processed_pseudogene	ribosomal protein S10 pseudogene 3 [Source:HGNC Symbol;Acc:HGNC:23684]	-
ENSG00000122515	22.5788	23.4704	27.0401	24.1281	26.6984	27.6011	ZMIZ2	7	44748581	44769881	+	7354	protein_coding	zinc finger MIZ-type containing 2 [Source:HGNC Symbol;Acc:HGNC:22229]	zf-MIZ
ENSG00000099330	15.3743	27.4269	21.682	27.3269	32.0549	27.5659	OCEL1	19	17226213	17229219	+	1858	protein_coding	occludin/ELL domain containing 1 [Source:HGNC Symbol;Acc:HGNC:26221]	-
ENSG00000198892	19.2366	30.0041	24.0413	27.3104	23.8007	26.9666	SHISA4	1	201888680	201892306	+	1746	protein_coding	shisa family member 4 [Source:HGNC Symbol;Acc:HGNC:27139]	-
ENSG00000135587	11.0232	26.4737	16.3999	29.5402	35.1019	32.7288	SMPD2	6	109440724	109443919	+	2053	protein_coding	sphingomyelin phosphodiesterase 2 [Source:HGNC Symbol;Acc:HGNC:11121]	-
ENSG00000105289	18.6243	27.332	23.3855	30.8525	26.6258	24.445	TJP3	19	3708362	3750813	+	3964	protein_coding	tight junction protein 3 [Source:HGNC Symbol;Acc:HGNC:11829]	-
ENSG00000126698	26.5877	38.8829	31.0372	21.365	12.5853	20.7384	DNAJC8	1	28199456	28233029	-	2892	protein_coding	DnaJ heat shock protein family (Hsp40) member C8 [Source:HGNC Symbol;Acc:HGNC:15470]	-
ENSG00000196363	24.9441	23.83	25.8279	24.7249	20.8623	30.9684	WDR5	9	134135365	134159968	+	3629	protein_coding	WD repeat domain 5 [Source:HGNC Symbol;Acc:HGNC:12757]	-
ENSG00000174791	18.0601	18.5562	23.5565	31.4756	28.9323	30.5044	RIN1	11	66330241	66336840	-	5377	protein_coding	Ras and Rab interactor 1 [Source:HGNC Symbol;Acc:HGNC:18749]	-
ENSG00000060688	27.3656	34.5548	31.6029	21.1486	12.9851	23.361	SNRNP40	1	31259568	31296788	-	3887	protein_coding	small nuclear ribonucleoprotein U5 subunit 40 [Source:HGNC Symbol;Acc:HGNC:30857]	-
ENSG00000169188	16.6719	17.6067	16.6137	32.8027	32.776	34.416	APEX2	X	55000363	55009057	+	3239	protein_coding	apurinic/apyrimidinic endodeoxyribonuclease 2 [Source:HGNC Symbol;Acc:HGNC:17889]	-
ENSG00000025772	22.8411	23.3857	22.3185	24.815	25.525	31.6766	TOMM34	20	44942130	44960397	-	1973	protein_coding	translocase of outer mitochondrial membrane 34 [Source:HGNC Symbol;Acc:HGNC:15746]	-
ENSG00000103335	24.8927	23.5364	29.029	27.0379	19.5132	26.3891	PIEZO1	16	88715338	88785220	-	11292	protein_coding	piezo type mechanosensitive ion channel component 1 [Source:HGNC Symbol;Acc:HGNC:28993]	-
ENSG00000140983	14.1442	20.0824	18.0681	29.3135	33.5834	35.0936	RHOT2	16	668105	674174	+	5155	protein_coding	ras homolog family member T2 [Source:HGNC Symbol;Acc:HGNC:21169]	-
ENSG00000078668	26.0584	38.4926	31.4297	22.6754	11.724	19.6252	VDAC3	8	42391624	42405937	+	3181	protein_coding	voltage dependent anion channel 3 [Source:HGNC Symbol;Acc:HGNC:12674]	-
ENSG00000104884	17.4723	26.5661	19.33	24.5839	28.7187	32.9685	ERCC2	19	45349837	45370918	-	6450	protein_coding	ERCC excision repair 2, TFIIH core complex helicase subunit [Source:HGNC Symbol;Acc:HGNC:3434]	-
novel.714	5.38648	33.8498	14.385	27.0946	55.8673	12.909	-	CHR_HSCHR6_MHC_APD_CTG1	29934629	29938007	+	1574	-	- && P30443.1 RecName: Full=HLA class I histocompatibility antigen, A-1 alpha chain; AltName: Full=MHC class I antigen A*1; Flags: Precursor && PF06623:MHC_I C-terminus	-
ENSG00000006744	21.9814	26.9827	22.2261	23.4419	22.7144	32.1306	ELAC2	17	12991612	13018065	-	7002	protein_coding	elaC ribonuclease Z 2 [Source:HGNC Symbol;Acc:HGNC:14198]	-
ENSG00000112640	24.5667	26.9106	21.5128	23.4238	22.0884	30.9059	PPP2R5D	6	42984553	43012342	+	3260	protein_coding	protein phosphatase 2 regulatory subunit B'delta [Source:HGNC Symbol;Acc:HGNC:9312]	-
ENSG00000183258	19.189	23.0111	20.9786	29.231	26.6509	30.2603	DDX41	5	177511577	177516961	-	4177	protein_coding	DEAD-box helicase 41 [Source:HGNC Symbol;Acc:HGNC:18674]	-
ENSG00000235043	17.7334	26.0718	20.815	25.2041	33.9007	25.5068	TECRP1	4	86949669	86950113	-	445	processed_pseudogene	trans-2,3-enoyl-CoA reductase pseudogene 1 [Source:HGNC Symbol;Acc:HGNC:44050]	-
ENSG00000167799	10.1215	20.4145	15.5261	37.8401	33.0734	32.054	NUDT8	11	67627938	67629937	-	1482	protein_coding	nudix hydrolase 8 [Source:HGNC Symbol;Acc:HGNC:8055]	-
ENSG00000110104	18.5194	20.4288	19.5771	28.1343	26.5135	35.7872	CCDC86	11	60842113	60851081	+	3342	protein_coding	coiled-coil domain containing 86 [Source:HGNC Symbol;Acc:HGNC:28359]	-
ENSG00000156261	24.3029	16.5616	28.8024	27.0773	34.2429	17.9724	CCT8	21	29055805	29073797	-	3341	protein_coding	chaperonin containing TCP1 subunit 8 [Source:HGNC Symbol;Acc:HGNC:1623]	-
ENSG00000130311	24.5933	26.0373	24.7125	27.5924	20.4764	25.5059	DDA1	19	17309518	17323298	+	4593	protein_coding	DET1 and DDB1 associated 1 [Source:HGNC Symbol;Acc:HGNC:28360]	-
novel.320	23.8104	46.9714	21.1577	24.6986	14.1604	18.1114	-	CHR_HG2030_PATCH	133347805	133351646	+	1501	-	- && P62425.2 RecName: Full=60S ribosomal protein L7a >P62424.2 RecName: Full=60S ribosomal protein L7a; AltName: Full=PLA-X polypeptide; AltName: Full=Surfeit locus protein 3 >Q4R5C2.1 RecName: Full=60S ribosomal protein L7a && -	-
ENSG00000198952	22.9566	24.7175	22.1066	23.2605	23.0182	32.7472	SMG5	1	156249224	156282825	-	5304	protein_coding	SMG5 nonsense mediated mRNA decay factor [Source:HGNC Symbol;Acc:HGNC:24644]	-
ENSG00000100220	27.5196	38.2958	28.6454	17.8806	14.6638	21.7747	RTCB	22	32387582	32412248	-	2941	protein_coding	RNA 2',3'-cyclic phosphate and 5'-OH ligase [Source:HGNC Symbol;Acc:HGNC:26935]	-
ENSG00000005007	22.9551	22.3633	22.1309	27.1297	21.7412	32.4173	UPF1	19	18831938	18868236	+	8600	protein_coding	UPF1 RNA helicase and ATPase [Source:HGNC Symbol;Acc:HGNC:9962]	-
ENSG00000158109	21.8389	36.4268	26.27	19.9719	17.7983	26.351	TPRG1L	1	3625015	3630127	+	2401	protein_coding	tumor protein p63 regulated 1 like [Source:HGNC Symbol;Acc:HGNC:27007]	-
ENSG00000169221	20.0199	20.8527	25.0066	28.4674	23.763	30.3962	TBC1D10B	16	30357102	30370494	-	6929	protein_coding	TBC1 domain family member 10B [Source:HGNC Symbol;Acc:HGNC:24510]	-
ENSG00000100380	28.0346	22.7145	29.1787	21.7505	25.3885	21.3881	ST13	22	40824535	40856639	-	3764	protein_coding	ST13 Hsp70 interacting protein [Source:HGNC Symbol;Acc:HGNC:11343]	-
ENSG00000164674	25.8304	39.4456	26.679	22.8429	15.3952	18.1211	SYTL3	6	158650014	158764876	+	2896	protein_coding	synaptotagmin like 3 [Source:HGNC Symbol;Acc:HGNC:15587]	-
ENSG00000117298	27.5578	23.1662	28.6589	26.651	19.1771	23.0865	ECE1	1	21217247	21345572	-	7308	protein_coding	endothelin converting enzyme 1 [Source:HGNC Symbol;Acc:HGNC:3146]	-
ENSG00000227500	19.4166	20.6073	21.183	27.0915	27.7475	32.0577	SCAMP4	19	1905372	1926013	+	6795	protein_coding	secretory carrier membrane protein 4 [Source:HGNC Symbol;Acc:HGNC:30385]	-
ENSG00000220472	25.1937	52.8138	24.3701	21.8042	9.91022	13.917	AL139095.2	6	7338839	7339568	-	730	processed_pseudogene	ribosomal protein S3 (RPS3) pseudogene	-
ENSG00000186994	13.5371	22.3735	16.4044	27.0025	35.5929	32.9855	KANK3	19	8322584	8343262	-	3594	protein_coding	KN motif and ankyrin repeat domains 3 [Source:HGNC Symbol;Acc:HGNC:24796]	-
ENSG00000121774	27.9715	14.4797	22.2365	25.7537	31.2212	26.215	KHDRBS1	1	32013868	32060850	+	3544	protein_coding	KH RNA binding domain containing, signal transduction associated 1 [Source:HGNC Symbol;Acc:HGNC:18116]	-
ENSG00000183298	17.7126	57.1983	20.968	21.6745	10.324	19.9844	RPSAP19	1	101786340	101787219	-	880	processed_pseudogene	ribosomal protein SA pseudogene 19 [Source:HGNC Symbol;Acc:HGNC:36508]	-
ENSG00000124541	27.7963	36.2411	30.6415	17.7213	15.2743	20.117	RRP36	6	43021623	43034156	+	2236	protein_coding	ribosomal RNA processing 36 [Source:HGNC Symbol;Acc:HGNC:21374]	-
ENSG00000125898	18.1134	22.5901	22.5239	29.978	24.7441	29.73	FAM110A	20	833715	857463	+	2722	protein_coding	family with sequence similarity 110 member A [Source:HGNC Symbol;Acc:HGNC:16188]	-
ENSG00000073060	20.4727	21.0749	19.4111	27.6329	26.1316	32.91	SCARB1	12	124776856	124882668	-	7741	protein_coding	scavenger receptor class B member 1 [Source:HGNC Symbol;Acc:HGNC:1664]	-
ENSG00000236439	17.7166	46.731	21.1278	22.2106	20.5336	19.3092	AC099336.2	1	202471864	202472117	-	254	processed_pseudogene	ribosomal protein S27 (metallopanstimulin 1) (RPS27) pseudogene	-
ENSG00000130720	14.2141	20.5291	18.6139	29.3579	31.6355	33.2359	FIBCD1	9	130902438	130939286	-	4056	protein_coding	fibrinogen C domain containing 1 [Source:HGNC Symbol;Acc:HGNC:25922]	-
ENSG00000176022	19.8095	22.3034	22.5126	28.3966	25.1115	29.4248	B3GALT6	1	1232237	1235041	+	2805	protein_coding	beta-1,3-galactosyltransferase 6 [Source:HGNC Symbol;Acc:HGNC:17978]	-
ENSG00000165264	26.9153	44.8804	31.1344	16.6205	15.8613	11.9303	NDUFB6	9	32553001	32573184	-	1386	protein_coding	NADH:ubiquinone oxidoreductase subunit B6 [Source:HGNC Symbol;Acc:HGNC:7701]	-
ENSG00000179820	28.9064	22.0518	27.9993	22.1889	20.851	24.9417	MYADM	19	53864763	53876435	+	4298	protein_coding	myeloid associated differentiation marker [Source:HGNC Symbol;Acc:HGNC:7544]	-
ENSG00000040608	20.6335	21.2979	22.8582	24.1915	25.6904	32.2084	RTN4R	22	20241415	20283246	-	3126	protein_coding	reticulon 4 receptor [Source:HGNC Symbol;Acc:HGNC:18601]	-
ENSG00000104783	24.0447	32.2742	30.7961	22.5315	18.3203	18.7718	KCNN4	19	43766533	43781257	-	3404	protein_coding	potassium calcium-activated channel subfamily N member 4 [Source:HGNC Symbol;Acc:HGNC:6293]	-
ENSG00000119655	26.5948	38.4707	27.8917	23.0383	13.954	16.7452	NPC2	14	74476192	74494177	-	2749	protein_coding	NPC intracellular cholesterol transporter 2 [Source:HGNC Symbol;Acc:HGNC:14537]	-
ENSG00000148180	22.3332	30.8528	27.6025	23.1021	20.9451	21.6529	GSN	9	121207794	121332843	+	11018	protein_coding	gelsolin [Source:HGNC Symbol;Acc:HGNC:4620]	-
ENSG00000156587	26.5679	38.0008	30.4819	17.3275	16.8352	17.2274	UBE2L6	11	57551656	57568284	-	2062	protein_coding	ubiquitin conjugating enzyme E2 L6 [Source:HGNC Symbol;Acc:HGNC:12490]	-
ENSG00000140105	31.4494	30.9608	28.938	19.2099	17.2849	18.5194	WARS	14	100333790	100376805	-	6356	protein_coding	tryptophanyl-tRNA synthetase [Source:HGNC Symbol;Acc:HGNC:12729]	-
ENSG00000068137	18.3989	21.2755	23.5707	28.875	25.3375	28.8546	PLEKHH3	17	42667914	42676994	-	4803	protein_coding	pleckstrin homology, MyTH4 and FERM domain containing H3 [Source:HGNC Symbol;Acc:HGNC:26105]	-
ENSG00000142655	20.4417	23.0724	23.3427	26.2274	22.3215	30.8267	PEX14	1	10472288	10630758	+	2932	protein_coding	peroxisomal biogenesis factor 14 [Source:HGNC Symbol;Acc:HGNC:8856]	-
ENSG00000106268	14.7698	28.6115	14.8572	33.853	23.9544	29.9609	NUDT1	7	2242222	2251146	+	2093	protein_coding	nudix hydrolase 1 [Source:HGNC Symbol;Acc:HGNC:8048]	-
ENSG00000239306	20.3091	17.228	15.4981	24.2747	25.5833	42.9786	RBM14	11	66616582	66627347	+	3937	protein_coding	RNA binding motif protein 14 [Source:HGNC Symbol;Acc:HGNC:14219]	-
ENSG00000136240	29.4559	30.0665	30.6211	17.4993	17.652	20.2529	KDELR2	7	6445953	6484190	-	3930	protein_coding	KDEL endoplasmic reticulum protein retention receptor 2 [Source:HGNC Symbol;Acc:HGNC:6305]	-
ENSG00000122952	25.8731	33.3779	27.1847	25.8527	12.8819	20.3386	ZWINT	10	56357227	56361273	-	2377	protein_coding	ZW10 interacting kinetochore protein [Source:HGNC Symbol;Acc:HGNC:13195]	-
ENSG00000187837	18.4885	35.17	21.5272	20.0854	24.5464	25.2103	HIST1H1C	6	26055787	26056428	-	642	protein_coding	histone cluster 1 H1 family member c [Source:HGNC Symbol;Acc:HGNC:4716]	-
ENSG00000123395	18.4502	37.2438	22.0838	21.2462	20.2481	25.6912	ATG101	12	52069246	52077494	+	3199	protein_coding	autophagy related 101 [Source:HGNC Symbol;Acc:HGNC:25679]	-
ENSG00000125611	14.383	38.2481	19.9868	22.8692	23.3186	26.1322	CHCHD5	2	112584240	112589275	+	3759	protein_coding	coiled-coil-helix-coiled-coil-helix domain containing 5 [Source:HGNC Symbol;Acc:HGNC:17840]	-
ENSG00000105327	22.211	34.716	25.1979	25.1746	22.7499	14.8723	BBC3	19	47220822	47232766	-	3180	protein_coding	BCL2 binding component 3 [Source:HGNC Symbol;Acc:HGNC:17868]	-
ENSG00000171530	25.6837	33.2679	30.146	27.1341	13.2513	15.3267	TBCA	5	77691166	77868780	-	3136	protein_coding	tubulin folding cofactor A [Source:HGNC Symbol;Acc:HGNC:11579]	-
ENSG00000102316	19.8113	35.1767	22.8808	24.4407	20.6564	21.8075	MAGED2	X	54807599	54816015	+	2943	protein_coding	MAGE family member D2 [Source:HGNC Symbol;Acc:HGNC:16353]	-
ENSG00000093010	20.9651	33.3962	25.5563	23.1798	18.5569	22.9279	COMT	22	19941607	19969975	+	5195	protein_coding	catechol-O-methyltransferase [Source:HGNC Symbol;Acc:HGNC:2228]	-
ENSG00000105486	18.5161	19.1764	17.9088	28.77	30.8633	29.279	LIG1	19	48115445	48170603	-	6576	protein_coding	DNA ligase 1 [Source:HGNC Symbol;Acc:HGNC:6598]	-
ENSG00000179222	20.9118	19.5818	19.3559	26.6142	26.3905	31.6084	MAGED1	X	51803007	51902357	+	6016	protein_coding	MAGE family member D1 [Source:HGNC Symbol;Acc:HGNC:6813]	-
ENSG00000183624	24.0202	24.9169	24.7245	23.2878	18.4989	28.9776	HMCES	3	129278828	129306186	+	2783	protein_coding	5-hydroxymethylcytosine binding, ES cell specific [Source:HGNC Symbol;Acc:HGNC:24446]	-
novel.383	16.0332	15.0117	15.6266	26.4421	32.2388	38.7235	-	CHR_HG2419_PATCH	144273993	144291463	-	541	-	- && Q14137.2 RecName: Full=Ribosome biogenesis protein BOP1; AltName: Full=Block of proliferation 1 protein && -	-
ENSG00000088256	21.6459	22.961	22.2937	24.7698	23.7709	28.6168	GNA11	19	3094362	3123999	+	6285	protein_coding	G protein subunit alpha 11 [Source:HGNC Symbol;Acc:HGNC:4379]	-
ENSG00000180964	22.0265	40.3116	37.1512	21.0743	13.013	10.4721	TCEAL8	X	103252995	103255192	-	1211	protein_coding	transcription elongation factor A like 8 [Source:HGNC Symbol;Acc:HGNC:28683]	-
ENSG00000004487	26.4108	15.6672	24.2161	23.7161	23.7107	29.7132	KDM1A	1	23019443	23083689	+	5440	protein_coding	lysine demethylase 1A [Source:HGNC Symbol;Acc:HGNC:29079]	-
ENSG00000112039	17.9276	25.2288	21.8191	25.4971	24.3948	28.2394	FANCE	6	35452356	35467103	+	2692	protein_coding	FA complementation group E [Source:HGNC Symbol;Acc:HGNC:3586]	-
ENSG00000115216	25.2231	39.4563	27.4105	15.6401	16.2592	19.0381	NRBP1	2	27427790	27442259	+	5329	protein_coding	nuclear receptor binding protein 1 [Source:HGNC Symbol;Acc:HGNC:7993]	-
ENSG00000119689	25.1808	28.8066	24.0518	22.9185	19.6925	22.0455	DLST	14	74881891	74903743	+	4548	protein_coding	dihydrolipoamide S-succinyltransferase [Source:HGNC Symbol;Acc:HGNC:2911]	-
ENSG00000171421	18.7004	46.83	20.3413	15.5023	13.9901	27.3228	MRPL36	5	1798385	1801366	-	1395	protein_coding	mitochondrial ribosomal protein L36 [Source:HGNC Symbol;Acc:HGNC:14490]	-
ENSG00000179913	21.8099	28.9106	26.3097	25.4429	20.4355	19.7619	B3GNT3	19	17794828	17813576	+	2769	protein_coding	UDP-GlcNAc:betaGal beta-1,3-N-acetylglucosaminyltransferase 3 [Source:HGNC Symbol;Acc:HGNC:13528]	-
ENSG00000120896	16.3766	14.3302	16.217	31.4488	29.6732	34.4177	SORBS3	8	22544986	22575788	+	6097	protein_coding	sorbin and SH3 domain containing 3 [Source:HGNC Symbol;Acc:HGNC:30907]	-
ENSG00000154102	20.603	30.7715	23.2573	24.3884	20.3136	23.0016	C16orf74	16	85690084	85751129	-	2181	protein_coding	chromosome 16 open reading frame 74 [Source:HGNC Symbol;Acc:HGNC:23362]	-
ENSG00000130787	21.976	27.7757	26.6007	21.2631	20.7925	23.7381	HIP1R	12	122834453	122862961	+	7072	protein_coding	huntingtin interacting protein 1 related [Source:HGNC Symbol;Acc:HGNC:18415]	-
ENSG00000100239	19.3373	25.9611	23.1713	25.8899	22.7721	24.7827	PPP6R2	22	50343304	50445090	+	5349	protein_coding	protein phosphatase 6 regulatory subunit 2 [Source:HGNC Symbol;Acc:HGNC:19253]	-
ENSG00000168883	24.203	28.3789	25.2545	21.3731	18.3437	24.3535	USP39	2	85602856	85649283	+	3953	protein_coding	ubiquitin specific peptidase 39 [Source:HGNC Symbol;Acc:HGNC:20071]	-
ENSG00000105393	16.6266	37.4479	19.2541	24.0695	22.3151	22.0429	BABAM1	19	17267376	17281249	+	2581	protein_coding	BRISC and BRCA1 A complex member 1 [Source:HGNC Symbol;Acc:HGNC:25008]	-
ENSG00000237550	15.2812	44.934	17.9425	21.7312	16.6601	25.0162	AC243919.1	15	82372196	82372912	-	717	transcribed_processed_pseudogene	ribosomal protein L9 pseudogene 9	-
novel.629	15.9362	16.9817	14.9442	25.2829	28.8658	39.5164	-	CHR_HSCHR19_2_CTG3_1	34359702	34381544	+	1461	-	- && P06744.4 RecName: Full=Glucose-6-phosphate isomerase; Short=GPI; AltName: Full=Autocrine motility factor; Short=AMF; AltName: Full=Neuroleukin; Short=NLK; AltName: Full=Phosphoglucose isomerase; Short=PGI; AltName: Full=Phosphohexose isomerase; Short=PHI; AltName: Full=Sperm antigen 36; Short=SA-36 && PF00342:Phosphoglucose isomerase	-
ENSG00000165458	19.0574	21.6666	21.2913	28.605	25.0804	25.547	INPPL1	11	72223701	72239147	+	6574	protein_coding	inositol polyphosphate phosphatase like 1 [Source:HGNC Symbol;Acc:HGNC:6080]	-
ENSG00000175701	16.5986	32.9395	19.8568	26.2944	19.7418	25.7918	MTLN	2	110211529	110245420	-	2051	protein_coding	mitoregulin [Source:HGNC Symbol;Acc:HGNC:27339]	-
ENSG00000156467	13.2718	27.6969	15.6258	34.517	25.7228	24.2613	UQCRB	8	96225920	96235634	-	9715	protein_coding	ubiquinol-cytochrome c reductase binding protein [Source:HGNC Symbol;Acc:HGNC:12582]	-
ENSG00000109501	19.6679	23.3545	21.4203	20.3431	24.2691	32.0284	WFS1	4	6269849	6303265	+	4513	protein_coding	wolframin ER transmembrane glycoprotein [Source:HGNC Symbol;Acc:HGNC:12762]	-
ENSG00000128342	30.1575	34.859	31.4677	18.6682	13.2271	12.6519	LIF	22	30240453	30246759	-	3871	protein_coding	LIF interleukin 6 family cytokine [Source:HGNC Symbol;Acc:HGNC:6596]	-
ENSG00000164713	20.8509	25.3549	22.6734	26.412	21.1273	24.2957	BRI3	7	98252379	98310441	+	5139	protein_coding	brain protein I3 [Source:HGNC Symbol;Acc:HGNC:1109]	-
ENSG00000142784	17.0133	21.4244	21.4657	28.5299	24.9523	27.2389	WDTC1	1	27234632	27308636	+	5911	protein_coding	WD and tetratricopeptide repeats 1 [Source:HGNC Symbol;Acc:HGNC:29175]	-
ENSG00000173171	14.5636	24.4758	16.5954	28.1714	26.3468	30.437	MTX1	1	155208699	155213824	+	3278	protein_coding	metaxin 1 [Source:HGNC Symbol;Acc:HGNC:7504]	-
ENSG00000214063	15.2961	28.8057	19.8235	21.4817	27.6034	27.5482	TSPAN4	11	842812	867116	+	5837	protein_coding	tetraspanin 4 [Source:HGNC Symbol;Acc:HGNC:11859]	-
ENSG00000100387	17.8653	42.4003	24.2746	17.0291	18.1737	20.734	RBX1	22	40951347	40973309	+	3092	protein_coding	ring-box 1 [Source:HGNC Symbol;Acc:HGNC:9928]	-
ENSG00000148840	20.2168	17.1699	20.4371	26.6681	21.6984	34.2798	PPRC1	10	102132994	102150333	+	6097	protein_coding	PPARG related coactivator 1 [Source:HGNC Symbol;Acc:HGNC:30025]	-
ENSG00000105767	25.5439	29.7749	24.233	27.5546	13.8153	19.2469	CADM4	19	43622368	43639850	-	2257	protein_coding	cell adhesion molecule 4 [Source:HGNC Symbol;Acc:HGNC:30825]	-
ENSG00000105612	25.0061	39.7477	26.2481	22.0682	13.5449	13.4909	DNASE2	19	12875209	12881466	-	2389	protein_coding	deoxyribonuclease 2, lysosomal [Source:HGNC Symbol;Acc:HGNC:2960]	-
ENSG00000125844	28.7967	18.5779	24.5184	22.8519	17.7724	27.3434	RRBP1	20	17613678	17682295	-	6980	protein_coding	ribosome binding protein 1 [Source:HGNC Symbol;Acc:HGNC:10448]	-
ENSG00000115694	19.1408	23.6169	20.064	27.0483	24.4265	25.531	STK25	2	241492670	241509730	-	7588	protein_coding	serine/threonine kinase 25 [Source:HGNC Symbol;Acc:HGNC:11404]	-
ENSG00000083857	20.0369	11.8188	15.874	26.7238	36.5444	28.7246	FAT1	4	186587794	186726722	-	16167	protein_coding	FAT atypical cadherin 1 [Source:HGNC Symbol;Acc:HGNC:3595]	-
ENSG00000118816	29.285	14.7705	23.7025	21.2759	27.4538	23.0793	CCNI	4	77047155	77075989	-	3728	protein_coding	cyclin I [Source:HGNC Symbol;Acc:HGNC:1595]	-
ENSG00000197070	16.726	26.6089	19.1833	26.6161	25.2587	25.1605	ARRDC1	9	137605685	137615360	+	3790	protein_coding	arrestin domain containing 1 [Source:HGNC Symbol;Acc:HGNC:28633]	-
ENSG00000142192	26.1346	16.0235	22.58	25.4776	25.0216	24.2498	APP	21	25880550	26171128	-	6316	protein_coding	amyloid beta precursor protein [Source:HGNC Symbol;Acc:HGNC:620]	-
ENSG00000161204	20.2029	26.2921	19.1866	26.5701	21.3037	25.8757	ABCF3	3	184186023	184194012	+	5207	protein_coding	ATP binding cassette subfamily F member 3 [Source:HGNC Symbol;Acc:HGNC:72]	-
ENSG00000151176	17.0354	14.9703	18.7693	27.4179	28.5519	32.4237	PLBD2	12	113358566	113391629	+	5264	protein_coding	phospholipase B domain containing 2 [Source:HGNC Symbol;Acc:HGNC:27283]	-
ENSG00000186283	23.1418	36.346	23.7823	21.7688	13.481	20.624	TOR3A	1	179082070	179098023	+	3224	protein_coding	torsin family 3 member A [Source:HGNC Symbol;Acc:HGNC:11997]	-
ENSG00000173726	23.5034	28.6842	24.3547	18.0501	25.92	18.6065	TOMM20	1	235109341	235128837	-	3438	protein_coding	translocase of outer mitochondrial membrane 20 [Source:HGNC Symbol;Acc:HGNC:20947]	-
ENSG00000141738	19.9624	20.9158	22.992	25.3369	25.772	24.1341	GRB7	17	39737927	39747291	+	3597	protein_coding	growth factor receptor bound protein 7 [Source:HGNC Symbol;Acc:HGNC:4567]	-
ENSG00000004975	17.858	21.737	19.6183	28.9544	26.5597	24.3601	DVL2	17	7225342	7234517	-	5321	protein_coding	dishevelled segment polarity protein 2 [Source:HGNC Symbol;Acc:HGNC:3086]	-
ENSG00000175467	20.5749	19.2559	18.9825	27.9726	21.2578	30.7688	SART1	11	65961728	65980137	+	4593	protein_coding	spliceosome associated factor 1, recruiter of U4/U6.U5 tri-snRNP [Source:HGNC Symbol;Acc:HGNC:10538]	-
ENSG00000079805	19.0419	20.8658	20.6655	24.8449	23.7958	29.5625	DNM2	19	10718079	10833488	+	13443	protein_coding	dynamin 2 [Source:HGNC Symbol;Acc:HGNC:2974]	-
ENSG00000167861	19.0486	20.9973	22.4442	22.5747	26.3437	27.2933	HID1	17	74950742	74973166	-	6197	protein_coding	HID1 domain containing [Source:HGNC Symbol;Acc:HGNC:15736]	-
ENSG00000234965	17.2676	14.4826	22.3941	26.7208	28.3399	29.3724	SHISA8	22	41909554	41914667	-	1405	protein_coding	shisa family member 8 [Source:HGNC Symbol;Acc:HGNC:18351]	-
ENSG00000137198	19.9024	31.246	24.5154	22.7591	17.6687	22.2948	GMPR	6	16238587	16295549	+	2225	protein_coding	guanosine monophosphate reductase [Source:HGNC Symbol;Acc:HGNC:4376]	-
ENSG00000068394	22.9324	32.727	23.6324	21.3067	14.5784	23.2	GPKOW	X	49113407	49123735	-	1658	protein_coding	G-patch domain and KOW motifs [Source:HGNC Symbol;Acc:HGNC:30677]	-
ENSG00000159166	17.7594	20.1152	19.2969	28.6889	23.6982	28.662	LAD1	1	201380833	201399915	-	3261	protein_coding	ladinin 1 [Source:HGNC Symbol;Acc:HGNC:6472]	-
ENSG00000132507	14.841	31.4437	23.1081	21.6615	20.4691	26.6429	EIF5A	17	7306999	7312463	+	2685	protein_coding	eukaryotic translation initiation factor 5A [Source:HGNC Symbol;Acc:HGNC:3300]	-
ENSG00000173334	26.8254	12.9547	24.8033	26.3792	23.9155	23.0245	TRIB1	8	125430358	125438403	+	4099	protein_coding	tribbles pseudokinase 1 [Source:HGNC Symbol;Acc:HGNC:16891]	-
ENSG00000120438	27.1796	13.5248	23.034	22.9141	25.7033	25.5264	TCP1	6	159778498	159789703	-	4883	protein_coding	t-complex 1 [Source:HGNC Symbol;Acc:HGNC:11655]	-
ENSG00000189403	25.7363	28.9097	29.2009	25.8659	15.7546	12.2359	HMGB1	13	30456704	30617597	-	7696	protein_coding	high mobility group box 1 [Source:HGNC Symbol;Acc:HGNC:4983]	HMG
ENSG00000088298	25.0971	32.9223	26.9626	20.3193	15.1812	17.1072	EDEM2	20	35115364	35147336	-	1884	protein_coding	ER degradation enhancing alpha-mannosidase like protein 2 [Source:HGNC Symbol;Acc:HGNC:15877]	-
ENSG00000274523	18.4804	27.9265	19.0966	22.2961	21.1306	28.6204	RCC1L	7	75027122	75074228	-	4196	protein_coding	RCC1 like [Source:HGNC Symbol;Acc:HGNC:14948]	-
ENSG00000084234	27.5098	20.3652	25.8079	22.6148	21.161	20.0253	APLP2	11	130068147	130144811	+	7463	protein_coding	amyloid beta precursor like protein 2 [Source:HGNC Symbol;Acc:HGNC:598]	-
ENSG00000026508	27.1067	13.6491	26.2043	24.6918	25.4787	20.2897	CD44	11	35138870	35232402	+	10004	protein_coding	CD44 molecule (Indian blood group) [Source:HGNC Symbol;Acc:HGNC:1681]	-
ENSG00000181026	23.5836	37.6038	29.5726	14.756	15.6062	16.1797	AEN	15	88621337	88632281	+	5976	protein_coding	apoptosis enhancing nuclease [Source:HGNC Symbol;Acc:HGNC:25722]	-
ENSG00000163832	18.7621	39.5645	20.4729	20.5556	16.7693	21.1225	ELP6	3	47495640	47513712	-	3264	protein_coding	elongator acetyltransferase complex subunit 6 [Source:HGNC Symbol;Acc:HGNC:25976]	-
ENSG00000099860	26.203	43.4123	27.6792	17.3399	10.3086	12.2892	GADD45B	19	2476122	2478259	+	2138	protein_coding	growth arrest and DNA damage inducible beta [Source:HGNC Symbol;Acc:HGNC:4096]	-
ENSG00000136026	32.7868	25.8778	25.9682	17.4039	14.7163	20.3353	CKAP4	12	106237881	106304279	-	3666	protein_coding	cytoskeleton associated protein 4 [Source:HGNC Symbol;Acc:HGNC:16991]	-
ENSG00000112576	19.7272	20.704	20.6906	23.3013	23.1303	29.5137	CCND3	6	41934933	42050357	-	5802	protein_coding	cyclin D3 [Source:HGNC Symbol;Acc:HGNC:1585]	-
ENSG00000213699	22.5805	23.6265	24.4353	23.6318	20.9406	21.7629	SLC35F6	2	26764284	26781231	+	3902	protein_coding	solute carrier family 35 member F6 [Source:HGNC Symbol;Acc:HGNC:26055]	-
ENSG00000041357	20.496	27.1667	26.3823	29.6528	16.5501	16.6397	PSMA4	15	78540405	78552417	+	6994	protein_coding	proteasome subunit alpha 4 [Source:HGNC Symbol;Acc:HGNC:9533]	-
ENSG00000171813	17.7643	26.9052	20.9125	20.3993	24.513	26.2843	PWWP2B	10	132397168	132417859	+	2647	protein_coding	PWWP domain containing 2B [Source:HGNC Symbol;Acc:HGNC:25150]	-
ENSG00000108774	17.952	35.3298	20.9277	20.2868	19.5603	22.7121	RAB5C	17	42124976	42155044	-	2761	protein_coding	RAB5C, member RAS oncogene family [Source:HGNC Symbol;Acc:HGNC:9785]	-
ENSG00000159685	18.3092	35.2192	19.7315	24.2869	17.9207	21.2457	CHCHD6	3	126704240	126960420	+	2757	protein_coding	coiled-coil-helix-coiled-coil-helix domain containing 6 [Source:HGNC Symbol;Acc:HGNC:28184]	-
ENSG00000146834	19.1065	24.5064	19.9346	28.2902	20.8645	23.9076	MEPCE	7	100428790	100434118	+	3212	protein_coding	methylphosphate capping enzyme [Source:HGNC Symbol;Acc:HGNC:20247]	-
ENSG00000099864	15.9194	20.44	18.6178	27.6053	26.5335	27.4868	PALM	19	708935	748329	+	4912	protein_coding	paralemmin [Source:HGNC Symbol;Acc:HGNC:8594]	-
ENSG00000012211	17.0537	21.7988	20.1075	21.9337	25.4328	30.2222	PRICKLE3	X	49174802	49186528	-	3656	protein_coding	prickle planar cell polarity protein 3 [Source:HGNC Symbol;Acc:HGNC:6645]	-
ENSG00000173653	17.6029	21.9471	18.7641	24.3488	25.9569	27.9233	RCE1	11	66842835	66846552	+	3001	protein_coding	Ras converting CAAX endopeptidase 1 [Source:HGNC Symbol;Acc:HGNC:13721]	-
ENSG00000131650	16.6525	24.7693	19.6182	23.8876	22.9161	28.6901	KREMEN2	16	2964216	2968383	+	2342	protein_coding	kringle containing transmembrane protein 2 [Source:HGNC Symbol;Acc:HGNC:18797]	-
ENSG00000166582	20.9612	28.7465	21.3059	22.0569	18.3198	25.0513	CENPV	17	16342534	16353656	-	2850	protein_coding	centromere protein V [Source:HGNC Symbol;Acc:HGNC:29920]	-
ENSG00000188846	23.0145	23.8375	21.3313	25.6543	25.44	17.0898	RPL14	3	40457292	40468587	+	8626	protein_coding	ribosomal protein L14 [Source:HGNC Symbol;Acc:HGNC:10305]	-
ENSG00000133935	22.4046	38.0063	22.2124	18.7297	15.8332	19.1773	ERG28	14	75649791	75660876	-	2320	protein_coding	ergosterol biosynthesis 28 homolog [Source:HGNC Symbol;Acc:HGNC:1187]	-
ENSG00000166166	12.1434	18.4483	16.4531	23.5907	27.8401	37.7005	TRMT61A	14	103529196	103537073	+	3217	protein_coding	tRNA methyltransferase 61A [Source:HGNC Symbol;Acc:HGNC:23790]	-
ENSG00000115286	12.7881	22.8261	14.4443	24.4106	32.1624	29.5446	NDUFS7	19	1383527	1395589	+	7456	protein_coding	NADH:ubiquinone oxidoreductase core subunit S7 [Source:HGNC Symbol;Acc:HGNC:7714]	-
ENSG00000109919	17.7023	44.3285	24.8531	17.5303	16.2734	15.3214	MTCH2	11	47617315	47642607	-	2881	protein_coding	mitochondrial carrier 2 [Source:HGNC Symbol;Acc:HGNC:17587]	-
ENSG00000106305	21.0852	22.5067	21.2738	25.7179	20.739	24.6837	AIMP2	7	6009255	6023834	+	1828	protein_coding	aminoacyl tRNA synthetase complex interacting multifunctional protein 2 [Source:HGNC Symbol;Acc:HGNC:20609]	-
ENSG00000141873	14.9052	21.7269	18.5775	26.0725	24.4183	30.2539	SLC39A3	19	2732204	2740028	-	4428	protein_coding	solute carrier family 39 member 3 [Source:HGNC Symbol;Acc:HGNC:17128]	-
ENSG00000060138	26.2581	19.3688	23.663	25.1394	19.2553	22.2361	YBX3	12	10699089	10723323	-	8621	protein_coding	Y-box binding protein 3 [Source:HGNC Symbol;Acc:HGNC:2428]	CSD
ENSG00000155287	20.1355	33.6012	23.5403	21.763	14.6485	22.0915	SLC25A28	10	99610522	99620609	-	1830	protein_coding	solute carrier family 25 member 28 [Source:HGNC Symbol;Acc:HGNC:23472]	-
ENSG00000149809	15.6561	25.5994	18.3353	26.3144	26.2204	23.6213	TM7SF2	11	65111845	65116396	+	3420	protein_coding	transmembrane 7 superfamily member 2 [Source:HGNC Symbol;Acc:HGNC:11863]	-
ENSG00000172534	17.182	14.6778	15.9084	26.4439	23.4008	38.0766	HCFC1	X	153947557	153971818	-	9011	protein_coding	host cell factor C1 [Source:HGNC Symbol;Acc:HGNC:4839]	-
ENSG00000065054	16.4157	16.118	19.6119	26.379	24.2603	32.8604	SLC9A3R2	16	2025356	2039026	+	3516	protein_coding	SLC9A3 regulator 2 [Source:HGNC Symbol;Acc:HGNC:11076]	-
ENSG00000182944	25.0804	20.5699	21.8489	22.3999	17.7433	27.8265	EWSR1	22	29268009	29300525	+	10326	protein_coding	EWS RNA binding protein 1 [Source:HGNC Symbol;Acc:HGNC:3508]	-
ENSG00000159792	13.4094	17.6122	15.6858	26.3394	31.643	30.7247	PSKH1	16	67893254	67929676	+	3993	protein_coding	protein serine kinase H1 [Source:HGNC Symbol;Acc:HGNC:9529]	-
ENSG00000135451	20.1393	23.2932	19.5217	26.7012	21.5445	24.1347	TROAP	12	49323236	49331731	+	3954	protein_coding	trophinin associated protein [Source:HGNC Symbol;Acc:HGNC:12327]	-
ENSG00000106683	17.662	18.1712	17.9448	26.6905	25.2994	29.5073	LIMK1	7	74082933	74122525	+	7038	protein_coding	LIM domain kinase 1 [Source:HGNC Symbol;Acc:HGNC:6613]	-
ENSG00000124767	22.865	18.978	25.118	18.8996	30.4685	18.7653	GLO1	6	38675925	38703145	-	2356	protein_coding	glyoxalase I [Source:HGNC Symbol;Acc:HGNC:4323]	-
ENSG00000141933	12.4096	24.4065	18.5297	21.1329	33.045	25.4135	TPGS1	19	507497	519654	+	3642	protein_coding	tubulin polyglutamylase complex subunit 1 [Source:HGNC Symbol;Acc:HGNC:25058]	-
ENSG00000079313	18.6921	18.3002	19.0931	24.2929	23.3512	31.0702	REXO1	19	1815248	1848483	-	5579	protein_coding	RNA exonuclease 1 homolog [Source:HGNC Symbol;Acc:HGNC:24616]	-
ENSG00000181392	11.4669	20.5951	14.6565	24.6712	30.4616	32.9151	SYNE4	19	36003307	36008813	-	2548	protein_coding	spectrin repeat containing nuclear envelope family member 4 [Source:HGNC Symbol;Acc:HGNC:26703]	-
ENSG00000177606	41.9701	36.745	37.8513	8.1038	5.50996	4.53906	JUN	1	58780791	58784047	-	3257	protein_coding	Jun proto-oncogene, AP-1 transcription factor subunit [Source:HGNC Symbol;Acc:HGNC:6204]	TF_bZIP
ENSG00000127838	15.2603	28.3713	17.57	23.1642	23.6808	26.5447	PNKD	2	218270392	218346793	+	5184	protein_coding	PNKD metallo-beta-lactamase domain containing [Source:HGNC Symbol;Acc:HGNC:9153]	-
ENSG00000197586	20.4557	28.5672	22.3525	21.5683	21.0272	20.5795	ENTPD6	20	25195693	25228075	+	6673	protein_coding	ectonucleoside triphosphate diphosphohydrolase 6 [Source:HGNC Symbol;Acc:HGNC:3368]	-
ENSG00000172432	25.3088	43.1876	28.0302	17.7352	9.95599	10.022	GTPBP2	6	43605316	43629264	-	4726	protein_coding	GTP binding protein 2 [Source:HGNC Symbol;Acc:HGNC:4670]	-
ENSG00000196235	21.0466	21.0302	21.8618	22.9747	20.1599	26.9776	SUPT5H	19	39436156	39476670	+	8568	protein_coding	SPT5 homolog, DSIF elongation factor subunit [Source:HGNC Symbol;Acc:HGNC:11469]	-
ENSG00000183283	21.969	15.8146	22.6963	24.778	21.4101	27.2644	DAZAP2	12	51238724	51271362	+	5299	protein_coding	DAZ associated protein 2 [Source:HGNC Symbol;Acc:HGNC:2684]	-
ENSG00000112658	23.3372	24.1096	25.767	21.8736	19.4448	19.3916	SRF	6	43171269	43181506	+	4231	protein_coding	serum response factor [Source:HGNC Symbol;Acc:HGNC:11291]	SRF
ENSG00000131043	18.3813	28.9811	20.8378	20.5098	21.5029	23.7014	AAR2	20	36236459	36270918	+	3101	protein_coding	AAR2 splicing factor [Source:HGNC Symbol;Acc:HGNC:15886]	-
ENSG00000040633	24.4597	36.2142	20.7386	19.1431	13.8715	19.3813	PHF23	17	7235029	7239722	-	2733	protein_coding	PHD finger protein 23 [Source:HGNC Symbol;Acc:HGNC:28428]	-
ENSG00000065621	14.6717	34.1482	19.7892	20.0007	21.0516	23.7738	GSTO2	10	104268873	104304950	+	9926	protein_coding	glutathione S-transferase omega 2 [Source:HGNC Symbol;Acc:HGNC:23064]	-
ENSG00000134910	28.6838	30.6165	28.4615	15.6122	13.6455	16.3539	STT3A	11	125591712	125625215	+	7369	protein_coding	STT3 oligosaccharyltransferase complex catalytic subunit A [Source:HGNC Symbol;Acc:HGNC:6172]	-
ENSG00000130164	38.6423	28.943	32.3275	10.9295	8.23995	14.1346	LDLR	19	11089362	11133816	+	7718	protein_coding	low density lipoprotein receptor [Source:HGNC Symbol;Acc:HGNC:6547]	-
[truncated: 59,484 more rows]
